# Supplementary material for: De Novo Transcriptome Identifies Olfactory Genes in Diachasmimorpha longicaudata (Ashmead)
Source: MDPI journal article supplement (doi:10.3390/genes11020144), 2020-01-29
Supplement: s1 [file s1]

|                          | C1                                               | C2                                                | C3                                 | C4                                | C5                                                     | C6                                      |                                 |                            |                                    |        |
|--------------------------|--------------------------------------------------|---------------------------------------------------|------------------------------------|-----------------------------------|--------------------------------------------------------|-----------------------------------------|---------------------------------|----------------------------|------------------------------------|--------|
|                          | *                                                | *                                                 | *                                  | *                                 | *                                                      | *                                       |                                 |                            |                                    |        |
| TRINITY_DN17498_c0_g1_i1 | -----MKF-----                                    | -----LVVVFVCLAGAL-AQELTEAQRRLREHRDI               | IRETDANRAEVDRARQ-GQWADNPQIRCFALCM  | MMRRLRLMSEDGQLNEAAARQRLALVVRP---- | ERVEEIMTKC-KDLKGNTP----                                | CDTGYLVCLKCYTDNRANVVX-----              |                                 |                            |                                    |        |
| TRINITY_DN1796_c0_g1_i1  | -----MARHMVCCFL-----                             | -----IGMAMQALLVSAGRPFITDDMMAMVADDKAR              | CMEHGTTEALIDEVNT-GALPNNRALTCYMDCL  | FAAFGVI-DEGELEVDMLVGFLPDHMQD----  | AARDLLETC-AKQPGADP----                                 | CDKVFEIAKCVQAKRPDLWFMIX-----            |                                 |                            |                                    |        |
| TRINITY_DN1838_c0_g1_i1  | -----MVKYI-----                                  | -----VSAFIAVCLVAAIRAGEIPPEFKEIAPEVRRV             | LEESGAENEWVVKANK-GDFTDDPKFKCYLKCT  | LAQFGAVSRKG-VNFDALTKLAP--PAY----  | KEILDKVISAC-KDTKPTIPGDV                                | CDQVYEASKCFYRAAPDNYFVMX-----            |                                 |                            |                                    |        |
| TRINITY_DN1916_c0_g1_i1  | -----MARHMVCCFL-----                             | -----IGMAMQALLVSAGRPFITDDMMAMVADDKAR              | CMEHGTTEALIDEVNT-GALPNNRALTCYMDCL  | FAAFGVI-DEGELEVDMLVGFLPDHMQD----  | AARDLLETC-AKQPGADP----                                 | CDKVFEIAKCVQAKRPDLWFMIX-----            |                                 |                            |                                    |        |
| TRINITY_DN2097_c0_g1_i2  | -----MKV-----                                    | -----FVVILSTCLIGAL-AQELTEAQKQKVRENRD              | ACITETGADREEVNKANK-GEWADNAKIRCF    | FTLCLMLKKWGMNDAGVLDEAAARQKMG      | LQMKP-----EKVEEIMTKC-KYLKGDTA----                      | CDTAYMMMKCYTDNRAVTVX-----               |                                 |                            |                                    |        |
| TRINITY_DN2097_c0_g1_i2  | -----MKF-----                                    | -----LVVVFVCLAGAL-AQELTEAQRRLREHRDI               | IRETDANRAEVDRARQ-GQWADNPQIRCFALCM  | MMRRLRLMSEDGQLNEAAARQRLALVVRP---- | ERVEEIMTKC-KDLKGNTP----                                | CDTGYLVCLKCYTDNRANVVX-----              |                                 |                            |                                    |        |
| TRINITY_DN2097_c0_g1_i2  | MRLAMKKSSSHCVRLVPDAYIGGHFLQIFTYQHAFATGSNFRELRIIQ | LMKFLVIAVLCIVGAL-ASEQRETPEARRQRYRDA               | CRAETGADQADIDKARK-GEWADKENLR       | CYTLCLMLKKGNLMNDEGVLD             | DEIVTRDTLARKLPA----EQINDIMAKC-KDLKGSNA----             | CGTAQRIMKCYNEQKTHLMX-----               |                                 |                            |                                    |        |
| TRINITY_DN22_c0_g3_i1    | -----MKV-----                                    | -----FVVILSTCLIGAL-AQELTEAQKQKVRENRD              | ACITETGADREEVNKANK-GEWADNAKIRCF    | FTLCLMLKKWGMNDAGVLDEAAARQKMG      | LQMKP-----EKVEEIMTKC-KYLKGDTA----                      | CDTAYMMMKCYTDNRAVTVX-----               |                                 |                            |                                    |        |
| TRINITY_DN23528_c0_g1_i1 | -----MCLLQTVKMKLL-----                           | -----VILLIFHVAF--AGAFRPADIVRFQRAVEK               | CRISEDVSDEVLERVLN-GEIVDDPHFNC      | FAACLL                            | EEFQLLKPDGFSFNDELAVTKIPQDADF--AQQLTDAIKTC-SARRDPDK---- | CTTAHLLFVCMYENNIPTLLFGX-----            |                                 |                            |                                    |        |
| TRINITY_DN2432_c0_g2_i1  | -----WEVLVEFSDSIHQFFFLDSQSKNQNSKMKS              | AFISGLV-----IVLVLFNFDNVG--AKMTIPQVTNMLMPMRKT      | CMQKTGASAE                         | LVDAPKT-GMPDPDPVLQCYACLLKMIKVL    | TKEGLPNVDSMVQM                                         | DMVMLPADDITARLKEVIALCTPAVTSTD           | S---CEGTWQIKCFYETDKNVCFFPX----- |                            |                                    |        |
| TRINITY_DN25035_c0_g1_i1 | MRLAMKKSSSHCVRLVPDAYIGGHFLQIFTYQHAFATGSNFRELRIIQ | LMKFLVIAVLCIVGAL-ASEQRETPEARRQRYRDA               | CRAETGADQADIDKARK-GEWADKENLR       | CYTLCLMLKKGNLMNDEGVLD             | DEIVTRDTLARKLPA----EQINDIMAKC-KDLKGSNA----             | CGTAQRIMKCYNEQKTHLMX-----               |                                 |                            |                                    |        |
| TRINITY_DN2526_c0_g2_i2  | -----MGIKALPIIQRENFK-----                        | -----MRIIGVSLALLSL-VLFVRGDDKDPHPGIREK             | CKDQFGLSSDDL----                   | K-AAMEDP                          | SDVGCYILCFFKDL                                         | SIMDDSGKFDPAALDAIEDSAK----DAKPVLS       | SSCDSKVKKSTTKDPCARALEVVT        | CFKEEAPELYKNLGIFHPLGX----- |                                    |        |
| TRINITY_DN26386_c0_g1_i1 | -----MNTS-----                                   | -----TVVLVFCALAVTF--VSGGDMKAEMHAQVEK              | CIETGVDP                           | SVLKS                             | LHETGGANADENVKLGACIMKGLGVMAADGT                        | VNLDAKSLVPSDAPD--HDALLAAVEEC-HAEKGAND-- | CETAHAIGMCMHKKHVGPMDX-----      |                            |                                    |        |
| TRINITY_DN26629_c0_g1_i1 | NNYLARC                                          | FRRHIAQYSFSMKSGLF-----VV-----                     | ALVGAF                             | AVAAGGP-PDKDCPLMKA-LKESID         | ACIDK--LSEESVKLMEK-DAFADNEE                            | IRCFHACVMT                              | HSGMLTD-GKMDIPALEEMLSGNP        | DPDEEEAQKII                | EIMKMKPEAEISDN--ECEVAGNYVKCFQAKKVN | X----- |
| TRINITY_DN2842_c0_g2_i1  | -----MKF-----                                    | -----LVVVFVCLAGAL-AQELTEAQRRLREHRDI               | IRETDANRAEVDRARQ-GQWADNPQIRCFALCM  | MMRRLRLMSEDGQLNEAAARQRLALVVRP---- | ERVEEIMTKC-KDLKGNTP----                                | CDTGYLVCLKCYTDNRANVVX-----              |                                 |                            |                                    |        |
| TRINITY_DN2842_c0_g3_i1  | MRLAMKKSSSHCVRLVPDAYIGGHFLQIFTYQHAFATGSNFRELRIIQ | LMKFLVIAVLCIVGAL-ASEQRETPEARRQRYRDA               | CRAETGADQADIDKARK-GEWADKENLR       | CYTLCLMLKKGNLMNDEGVLD             | DEIVTRDTLARKLPA----EQINDIMAKC-KDLKGSNA----             | CGTAQRIMKCYNEQKTHLMX-----               |                                 |                            |                                    |        |
| TRINITY_DN2842_c0_g3_i1  | -----MKV-----                                    | -----FVVILSTCLIGAL-AQELTEAQKQKVRENRD              | ACITETGADREEVNKANK-GEWADNAKIRCF    | FTLCLMLKKWGMNDAGVLDEAAARQKMG      | LQMKP-----EKVEEIMTKC-KYLKGDTA----                      | CDTAYMMMKCYTDNRAVTVX-----               |                                 |                            |                                    |        |
| TRINITY_DN2902_c0_g1_i1  | -----MGIKALPIIQRENFK-----                        | -----RRSTGID-----MRIIGVSLALLSL-VLFVRGDDKDPHPGIREK | CKDQFGLSSDDLKAAME-----DP           | SDVGCYILCFFKDL                    | SIMDDSGKFDPAALDAIEDSAK----DAKPVLS                      | SSCDSKVKKSTTKDPCARALEVVT                | CFKEEAPELYKNLGIFHPLGX-----      |                            |                                    |        |
| TRINITY_DN30107_c0_g1_i1 | NNYLARC                                          | FRRHIAQYSFSMKSGLF-----VV-----                     | ALVGAF                             | AVAAGGP-PDKDCPLMKA-LKESID         | ACIDK--LSEESVKLMEK-DAFADNEE                            | IRCFHACVMT                              | HSGMLTD-GKMDIPALEEMLSGNP        | DPDEEEAQKII                | EIMKMKPEAEISDN--ECEVAGNYVKCFQAKKVN | X----- |
| TRINITY_DN30439_c0_g1_i4 | -----MNTS-----                                   | -----TVVLVFCALAVTF--VSGGDMKAEMHAQVEK              | CIETGVDP                           | SVLKS                             | LHETGGANADENVKLGACIMKGLGVMAADGT                        | VNLDAKSLVPSDAPD--HDALLAAVEEC-HAEKGAND-- | CETAHAIGMCMHKKHVGPMDX-----      |                            |                                    |        |
| TRINITY_DN3053_c0_g1_i2  | -----GKYSWNSVIRYIRNFFFLDSQSKNQNSKMKS             | AFISGLV-----IVLVLFNFDNVG--AKMTIPQVTNMLMPMRKT      | CMQKTGASAE                         | LVDAPKT-GMPDPDPVLQCYACLLKMIKVL    | TKEGLPNVDSMVQM                                         | DMVMLPADDITARLKEVIALCTPAVTSTD           | S---CEGTWQIKCFYETDKNVCFFPX----- |                            |                                    |        |
| TRINITY_DN3355_c0_g1_i1  | -----MGIKALPIIQRENFK-----                        | -----RRSTGID-----MRIIGVSLALLSL-VLFVRGDDKDPHPGIREK | CKDQFGLSSDDLKAAME-----DP           | SDVGCYILCFFKDL                    | SIMDDSGKFDPAALDAIEDSAK----DAKPVLS                      | SSCDSKVKKSTTKDPCARALEVVT                | CFKEEAPELYKNLGIFHPLGX-----      |                            |                                    |        |
| TRINITY_DN3475_c0_g1_i4  | -----MRKYVGFLC-----LI-----                       | -----LQVSIHGCGPVG-RPDFVSD                         | EMIALAASVVNAQTQTGVATADIEAVRN-GQWLN | STPLKCYMYCLWEQFGLVDDKRELS         | NGMLTFFQRI                                             | PAY--RAEVQTAIRECKKIADGDN--              | CQYAYTFNLCYSKLS                 | SPRTYYLFX-----             |                                    |        |
| TRINITY_DN3475_c0_g1_i4  | -----MRKYVGFLC-----LI-----                       | -----LQVSIHGCGPVG-RPDFVSD                         | EMIALAASVVNAQTQTGVATADIEAVRN-GQWLN | STPLKCYMYCLWEQFGLVDDKRELS         | NGMLTFFQRI                                             | PAY--RAEVQTAIRECKKIGKFFADGDN            | CQYAYTFNLCYSKLS                 | SPRTYYLFX-----             |                                    |        |
| TRINITY_DN36216_c0_g1_i1 | -----MNTS-----                                   | -----TVVLVFCALAVTF--VSGGDMKAEMHAQVEK              | CIETGVDP                           | SVLKS                             | LHETGGANADENVKLGACIMKGLGVMAADGT                        | VNLDAKSLVPSDAPD--HDALLAAVEEC-HAEKGAND-- | CETAHAIGMCMHKKHVGPMDX-----      |                            |                                    |        |
| TRINITY_DN3638_c0_g1_i1  | -----EVLVEFSDSIHQFFFLDSQSKNQNSKMKS               | AFISGLV-----IVLVLFNFDNVG--AKMTIPQVTNMLMPMRKT      | CMQKTGASAE                         | LVDAPKT-GMPDPDPVLQCYACLLKMIKVL    | TKEGLPNVDSMVQM                                         | DMVMLPADDITARLKEVIALCTPAVTSTD           | S---CEGTWQIKCFYETDKNVCFFPX----- |                            |                                    |        |
| TRINITY_DN3641_c0_g2_i1  | -----MVKYI-----                                  | -----VSAFIAVCLVAAIRAGEIPPEFKEIAPEVRRV             | LEESGAENEWVVKANK-GDFTDDPKFKCYLKCT  | LAQFGAVSRKG-VNFDALTKLAP--PAY----  | KEILDKVISAC-KDTKPTIPGDV                                | CDQVYEASKCFYRAAPDNYFVMX-----            |                                 |                            |                                    |        |
| TRINITY_DN3807_c0_g1_i3  | -----MRKYVGFLC-----LI-----                       | -----LQVSIHGCGPVG-RPDFVSD                         | EMIALAASVVNAQTQTGVATADIEAVRN-GQWLN | STPLKCYMYCLWEQFGLVDDKRELS         | NGMLTFFQRI                                             | PAY--RAEVQTAIRECKKIGKFFADGDN            | CQYAYTFNLCYSKLS                 | SPRTYYLFX-----             |                                    |        |
| TRINITY_DN4374_c0_g1_i4  | -----MRKYVGFLC-----LI-----                       | -----LQVSIHGCGPVG-RPDFVSD                         | EMIALAASVVNAQTQTGVATADIEAVRN-GQWLN | STPLKCYMYCLWEQFGLVDDKRELS         | NGMLTFFQRI                                             | PAY--RAEVQTAIRECKKIGKFFADGDN            | CQYAYTFNLCYSKLS                 | SPRTYYLFX-----             |                                    |        |
| TRINITY_DN5058_c0_g1_i1  | -----MRKYVGFLC-----LI-----                       | -----LQVSIHGCGPVG-RPDFVSD                         | EMIALAASVVNAQTQTGVATADIEAVRN-GQWLN | STPLKCYMYCLWEQFGLVDDKRELS         | NGMLTFFQRI                                             | PAY--RAEVQTAIRECKKIGKFFADGDN            | CQYAYTFNLCYSKLS                 | SPRTYYLFX-----             |                                    |        |
| TRINITY_DN5692_c0_g1_i2  | NNYLARC                                          | FRRHIAQYSFSMKSGLF-----VV-----                     | ALVGAF                             | AVAAGGP-PDKDCPLMKA-LKESID         | ACIDK--LSEESVKLMEK-DAFADNEE                            | IRCFHACVMT                              | HSGMLTD-GKMDIPALEEMLSGNP        | DPDEEEAQKII                | EIMKMKPEAEISDN--ECEVAGNYVKCFQAKKVN | X----- |
| TRINITY_DN7227_c0_g2_i1  | -----QTVKMKLL-----                               | -----VILLIFHVAF--AGAFRPADIVRFQRAVEK               | CRISEDVSDEVLERVLN-GEIVDDPHFNC      | FAACLL                            | EEFQLLKPDGFSFNDELAVTKIPQDADF--AQQLTDAIKTC-SARRDPDK---- | CTTAHLLFVCMYENNIPTLLFGX-----            |                                 |                            |                                    |        |
| cluster_contig12763      | -----MRKYVGFLC-----LI-----                       | -----LQVSIHGCGPVG-RPDFVSD                         | EMIALAASVVNAQTQTGVATADIEAVRN-GQWLN | STPLKCYMYCLWEQFGLVDDKRELS         | NGMLTFFQRI                                             | PAY--RAEVQTAIRECKKIGKFFADGDN            | CQYAYTFNLCYSKLS                 | SPRTYYLFX-----             |                                    |        |
| cluster_contig3353       | -----MCLLQTVKMKLL-----                           | -----VILLIFHVAF--AGAFRPADIVRFQRAVEK               | CRISEDVSDEVLERVLN-GEIVDDPHFNC      | FAACLL                            | EEFQLLKPDGFSFNDELAVTKIPQDADF--AQQLTDAIKTC-SARRDPDK---- | CTTAHLLFVCMYENNIPTLLFGX-----            |                                 |                            |                                    |        |
| cluster_contig3738       | -----MVKYI-----                                  | -----VSAFIAVCLVAAIRAGEIPPEFKEIAPEVRRV             | LEESGAENEWVVKANK-GDFTDDPKFKCYLKCT  | LAQFGAVSRKG-VNFDALTKLAP--PAY----  | KEILDKVISAC-KDTKPTIPGDV                                | CDQVYEASKCFYRAAPDNYFVMX-----            |                                 |                            |                                    |        |
| cluster_contig4520       | -----MKV-----                                    | -----FVVILSTCLIGAL-AQELTEAQKQKVRENRD              | ACITETGADREEVNKANK-GEWADNAKIRCF    | FTLCLMLKKWGMNDAGVLDEAAARQKMG      | LQMKP-----EKVEEIMTKC-KYLKGDTA----                      | CDTAYMMMKCYTDNRAVTVX-----               |                                 |                            |                                    |        |
| cluster_contig4670       | MRLAMKKSSSHCVRLVPDAYIGGHFLQIFTYQHAFATGSNFRELRIIQ | LMKFLVIAVLCIVGAL-ASEQRETPEARRQRYRDA               | CRAETGADQADIDKARK-GEWADKENLR       | CYTLCLMLKKGNLMNDEGVLD             | DEIVTRDTLARKLPA----EQINDIMAKC-KDLKGSNA----             | CGTAQRIMKCYNEQKTHLMX-----               |                                 |                            |                                    |        |
| cluster_contig6435       | -----FTYWEVLVEFSDSIHQFFFLDSQSKNQNSKMKS           | AFISGLV-----IVLVLFNFDNVG--AKMTIPQVTNMLMPMRKT      | CMQKTGASAE                         | LVDAPKT-GMPDPDPVLQCYACLLKMIKVL    | TKEGLPNVDSMVQM                                         | DMVMLPADDITARLKEVIALCTPAVTSTD           | S---CEGTWQIKCFYETDKNVCFFPX----- |                            |                                    |        |
| cluster_contig6516       | -----MKF-----                                    | -----LVVVFVCLAGAL-AQELTEAQRRLREHRDI               | IRETDANRAEVDRARQ-GQWADNPQIRCFALCM  | MMRRLRLMSEDGQLNEAAARQRLALVVRP---- | ERVEEIMTKC-KDLKGNTP----                                | CDTGYLVCLKCYTDNRANVVX-----              |                                 |                            |                                    |        |
