# Supplementary material for: De Novo Transcriptome Identifies Olfactory Genes in Diachasmimorpha longicaudata (Ashmead)
Source: Genes (Basel). 2020 Jan 29;11(2):144. doi: 10.3390/genes11020144 (PMC7074194; doi:10.3390/genes11020144)
Supplement: Supplementary file 1 [file genes-11-00144-s001.gz]

Archive with 10 entries (10 files):
- ._Figure S1.pdf
- Figure S1.pdf
- ._Table S1.xlsx
- Table S1.xlsx
- ._Table S2.xlsx
- Table S2.xlsx
- ._Table S3.xlsx
- Table S3.xlsx
- ._Table S4.xlsx
- Table S4.xlsx
