# Supplementary material for: De Novo Transcriptome Identifies Olfactory Genes in Diachasmimorpha longicaudata (Ashmead)
Source: Genes (Basel). 2020 Jan 29;11(2):144. doi: 10.3390/genes11020144 (PMC7074194; doi:10.3390/genes11020144)
Supplement: Supplementary file 1 [file genes-11-00144-s001.gz › Table S1.xlsx]

## Sheet: Sheet1
Table S1. miRNA precursors identified in the parasitoid wasp transcriptome.
TranscriptID	Start	End	Strand	Length	Energy	Sequence	miRNA	Type
TRINITY_DN21313_c0_g1_i4	741	814	-	74(nt)	-19.60(kcal/mol)	ATCACACGGCATCGAATATCTTCATGATGGGGCAGTGCCTCCAGTCGTACATAGAGATTTGAAGTCCGCCAACA	miR-10504	coding
cluster_contig16194	869	942	-	74(nt)	-19.60(kcal/mol)	ATCACACGGCATCGAATATCTTCATGATGGGGCAGTGCCTCCAGTCGTACATAGAGATTTGAAGTCCGCCAACA	miR-10504	coding
TRINITY_DN22790_c0_g1_i1	136	219	+	84(nt)	-33.20(kcal/mol)	AGGTGTCGCGGTTCAAGTGGAGAAGTGGTCTCTGCGCTTGGCATTAAAAGTGAGATTCAACTCCTCCAACTTATTCCGGGCACC	miR-1175	coding
TRINITY_DN7850_c0_g2_i1	347	430	-	84(nt)	-33.20(kcal/mol)	AGGTGTCGCGGTTCAAGTGGAGAAGTGGTCTCTGCGCTTGGCATTAAAAGTGAGATTCAACTCCTCCAACTTATTCCGGGCACC	miR-1175	coding
TRINITY_DN8855_c0_g1_i2	210	293	+	84(nt)	-33.20(kcal/mol)	AGGTGTCGCGGTTCAAGTGGAGAAGTGGTCTCTGCGCTTGGCATTAAAAGTGAGATTCAACTCCTCCAACTTATTCCGGGCACC	miR-1175	coding
cluster_contig12230	97	180	-	84(nt)	-33.20(kcal/mol)	AGGTGTCGCGGTTCAAGTGGAGAAGTGGTCTCTGCGCTTGGCATTAAAAGTGAGATTCAACTCCTCCAACTTATTCCGGGCACC	miR-1175	coding
TRINITY_DN1634_c1_g1_i2	1023	1096	-	74(nt)	-30.20(kcal/mol)	AGATGAGCACGGGCCGGGCGTTGTTTGTGGTGGTGTGCGTAGCGGCGGCGGCGGCGGGGGGGCGGTGCTGGGGT	miR-11976	coding
TRINITY_DN9043_c0_g2_i1	44	108	-	65(nt)	-28.10(kcal/mol)	GCTGGGCGCGCGACGGCGATGGCGAGGCGGCAGCGGCGGCGGCGGCGGCGCGGCGAGGGCGACGG	miR-11976	coding
TRINITY_DN2315_c0_g1_i4	1056	1136	-	81(nt)	-37.50(kcal/mol)	GGCACGGGTGTGAGTATTACATCAGGTACTGGTGTATGTTTATTATCAACCAGTGCTTGTGTTATACTTTCGCTCATGTCT	miR-12	coding
TRINITY_DN11956_c0_g1_i6	1098	1194	+	97(nt)	-41.60(kcal/mol)	AGGCCGCAGCACTTCTTGCAGCCCCAGCTGCTGCATCTCCTGCGGCCCGGCCTGCTGTGAGCTCCCCTGCGCTGGGGTTGGGAAGGGTCTGCATTCA	miR-12056	coding*
TRINITY_DN1022_c0_g1_i7	1907	1997	-	91(nt)	-35.30(kcal/mol)	GTGACGTCCACATGCGTCCAGGAGGTCGTTTTCCCTCATTTGGATGTTCGAACAGAGGGGGTGAGGACTGGGGAGGGTGAGAAGGGCGTCA	miR-1224	coding
TRINITY_DN1213_c0_g1_i10	1912	2002	-	91(nt)	-35.30(kcal/mol)	GTGACGTCCACATGCGTCCAGGAGGTCGTTTTCCCTCATTTGGATGTTCGAACAGAGGGGGTGAGGACTGGGGAGGGTGAGAAGGGCGTCA	miR-1224	coding
TRINITY_DN1213_c0_g1_i2	2240	2330	-	91(nt)	-35.30(kcal/mol)	GTGACGTCCACATGCGTCCAGGAGGTCGTTTTCCCTCATTTGGATGTTCGAACAGAGGGGGTGAGGACTGGGGAGGGTGAGAAGGGCGTCA	miR-1224	coding
TRINITY_DN1213_c0_g1_i6	1912	2002	-	91(nt)	-35.30(kcal/mol)	GTGACGTCCACATGCGTCCAGGAGGTCGTTTTCCCTCATTTGGATGTTCGAACAGAGGGGGTGAGGACTGGGGAGGGTGAGAAGGGCGTCA	miR-1224	coding
TRINITY_DN206_c0_g1_i13	8547	8637	-	91(nt)	-35.30(kcal/mol)	GTGACGTCCACATGCGTCCAGGAGGTCGTTTTCCCTCATTTGGATGTTCGAACAGAGGGGGTGAGGACTGGGGAGGGTGAGAAGGGCGTCA	miR-1224	coding
TRINITY_DN223_c0_g1_i10	8799	8889	-	91(nt)	-35.30(kcal/mol)	GTGACGTCCACATGCGTCCAGGAGGTCGTTTTCCCTCATTTGGATGTTCGAACAGAGGGGGTGAGGACTGGGGAGGGTGAGAAGGGCGTCA	miR-1224	coding
TRINITY_DN262_c0_g1_i12	10081	10171	-	91(nt)	-35.30(kcal/mol)	GTGACGTCCACATGCGTCCAGGAGGTCGTTTTCCCTCATTTGGATGTTCGAACAGAGGGGGTGAGGACTGGGGAGGGTGAGAAGGGCGTCA	miR-1224	coding
TRINITY_DN262_c0_g1_i7	10157	10247	-	91(nt)	-35.30(kcal/mol)	GTGACGTCCACATGCGTCCAGGAGGTCGTTTTCCCTCATTTGGATGTTCGAACAGAGGGGGTGAGGACTGGGGAGGGTGAGAAGGGCGTCA	miR-1224	coding
TRINITY_DN283_c1_g1_i3	2294	2384	-	91(nt)	-35.30(kcal/mol)	GTGACGTCCACATGCGTCCAGGAGGTCGTTTTCCCTCATTTGGATGTTCGAACAGAGGGGGTGAGGACTGGGGAGGGTGAGAAGGGCGTCA	miR-1224	coding
TRINITY_DN515_c0_g1_i1	2137	2227	-	91(nt)	-35.30(kcal/mol)	GTGACGTCCACATGCGTCCAGGAGGTCGTTTTCCCTCATTTGGATGTTCGAACAGAGGGGGTGAGGACTGGGGAGGGTGAGAAGGGCGTCA	miR-1224	coding
TRINITY_DN17674_c0_g1_i1	38	117	-	80(nt)	-32.40(kcal/mol)	CTTCGCCGGTTCCCTGAGACCCTAACTTGTGACGTCGCGTCCGATATCTCACAGGCTAGATTCTCTGGTATTGGCGATGA	miR-125b	coding
TRINITY_DN29104_c0_g1_i1	52	130	+	79(nt)	-30.60(kcal/mol)	CATCGCCAATACCAGAGAATCTAGCCTGTGAGATATCGGACGCGACGTCACAAGTTAGGGTCTCAGGGAACCGGCGAAG	miR-125b	coding
TRINITY_DN29104_c0_g1_i1	51	130	-	80(nt)	-32.40(kcal/mol)	CTTCGCCGGTTCCCTGAGACCCTAACTTGTGACGTCGCGTCCGATATCTCACAGGCTAGATTCTCTGGTATTGGCGATGA	miR-125c	coding
TRINITY_DN21976_c3_g1_i1	7	106	-	100(nt)	-39.00(kcal/mol)	GGGAGACTGAGGCAGAATGGTGTGAACCCAGGAGGTGGAGGTTGCAGTGAGCCAAGATTGCGCCACTGCACTCCAGCCTGGGCGACAGAGCGAGACTCCG	miR-1285	coding
TRINITY_DN1292_c0_g2_i4	4613	4708	+	96(nt)	-22.70(kcal/mol)	ATTGTTGAAGACTGAAAATTCCCTCGCAAATAATTTCATTTAATTGTCTCATTAATTTAACCAATATCTGCAAGAGAATTTTCAGTCACTGAACGA	miR-1339	coding
cluster_contig1333	1210	1305	+	96(nt)	-22.70(kcal/mol)	ATTGTTGAAGACTGAAAATTCCCTCGCAAATAATTTCATTTAATTGTCTCATTAATTTAACCAATATCTGCAAGAGAATTTTCAGTCACTGAACGA	miR-1339	coding
TRINITY_DN4918_c0_g1_i4	7423	7509	+	87(nt)	-26.70(kcal/mol)	AGCGCCATTTCTGCAGGGAGACGTCATCACGCACTCGTCGACATCTTCATCGCAGAGACGACCAGTGTAGCCAACAGTGCAGGTGCA	miR-1419e	coding
cluster_contig12647	7312	7398	+	87(nt)	-26.70(kcal/mol)	AGCGCCATTTCTGCAGGGAGACGTCATCACGCACTCGTCGACATCTTCATCGCAGAGACGACCAGTGTAGCCAACAGTGCAGGTGCA	miR-1419e	coding
TRINITY_DN4492_c0_g1_i1	734	815	-	82(nt)	-26.00(kcal/mol)	GACGGACCATCCGGGTGGGGCTGGTATGGGTGCGTGTCTTGGACAGATTGTTCCACTTGCATCTCTACCTCTTGATGCTGGA	miR-1584	coding
cluster_contig8476	885	966	-	82(nt)	-26.00(kcal/mol)	GACGGACCATCCGGGTGGGGCTGGTATGGGTGCGTGTCTTGGACAGATTGTTCCACTTGCATCTCTACCTCTTGATGCTGGA	miR-1584	coding
TRINITY_DN12177_c1_g1_i1	702	782	-	81(nt)	-33.00(kcal/mol)	GCATCCGTGAGGGTGATTCGGCGGTTCGGCTGAGGGAGGCTGCGGGCTCGATTGGGCTGGGCTGGGTCTGGTCGAGGGTGG	miR-1587	coding
TRINITY_DN12177_c1_g1_i3	599	679	-	81(nt)	-33.00(kcal/mol)	GCATCCGTGAGGGTGATTCGGCGGTTCGGCTGAGGGAGGCTGCGGGCTCGATTGGGCTGGGCTGGGTCTGGTCGAGGGTGG	miR-1587	coding
cluster_contig16909	262	344	-	83(nt)	-32.10(kcal/mol)	GCGGGCTCGGTTGGGCTGGGCTGGCTCGGGTCGAGGGTGGCTGGTTCGGGTGCGGTGCGGGAGCTGGGCTGAGGGTGAAGGCG	miR-1587	coding
cluster_contig5435	409	492	-	84(nt)	-34.10(kcal/mol)	GTGCCTAAAGCCCCTTATCATTCTCTTGTCCGGTGTAAATGGTCGTCTCGACTGGACGGAGAACTGATAAGGGCCCGAGGGTTA	miR-184a	coding
TRINITY_DN5515_c3_g1_i1	39	109	-	71(nt)	-19.30(kcal/mol)	AGTTAGACTAGTTGGATTTATTGGATTTGTTAGATATATTTGATATGTTTGATATGTTAGACTGGTTAGAC	miR-190	coding
TRINITY_DN5515_c3_g1_i1	129	217	-	89(nt)	-24.50(kcal/mol)	TGTTAGACTGGTTTGACTAGTTAGACTAGTTGGATTTATTGGATTTGTTAGATATATTTGATATGTTTGATATGTTAGACTGGTTAGAC	miR-190	coding
TRINITY_DN14975_c0_g1_i6	1541	1628	-	88(nt)	-22.60(kcal/mol)	CCTGATACCTTGGAATGGAAAGCAGGATGTTTTGATTGACAGATTTGACGGTCGAGCGCTTCTTGACTTTATCCGTGATGGTAGTGCC	miR-1c	coding
TRINITY_DN16014_c1_g1_i6	1069	1168	+	100(nt)	-23.80(kcal/mol)	CGAGTGCAGGATTTTCTGCTGCTGCAGATGCAACAAAGGTCTCGATATCACTTGGTCTATTGAAGCTGGTCATGACAGGGGTGGCGGTTCTGGTTGTTGA	miR-2281	coding
TRINITY_DN36557_c0_g2_i1	128	208	+	81(nt)	-18.70(kcal/mol)	CCGAAATTTAAAATTTGGTTCGGATTTTTCGGATTTTCGGATCGGTTCGGATGGAAAAATTTAAAAAATTGGATTTTCGGT	miR-2284f	noncoding
TRINITY_DN16738_c0_g2_i1	1447	1540	+	94(nt)	-32.70(kcal/mol)	TGCCCTGTTCCTAAGTACTAGTGCCGCAGGAGTGACTAGACTGGGCTAGAAATTACCATGTCTCCTGCTGCTCAAGTGCTTATCAATGGGTCGG	miR-252	coding
TRINITY_DN5755_c0_g1_i1	85	177	-	93(nt)	-32.20(kcal/mol)	CCCTGTTCCTAAGTACTAGTGCCGCAGGAGTGACTAGACTGGGCTAGAAATTACCATGTCTCCTGCTGCTCAAGTGCTTATCAATGGGTCGGG	miR-252	coding
cluster_contig2504	130	222	-	93(nt)	-32.20(kcal/mol)	CCCTGTTCCTAAGTACTAGTGCCGCAGGAGTGACTAGACTGGGCTAGAAATTACCATGTCTCCTGCTGCTCAAGTGCTTATCAATGGGTCGGG	miR-252	coding
TRINITY_DN3935_c0_g1_i3	1284	1377	+	94(nt)	-32.70(kcal/mol)	TGCCCTGTTCCTAAGTACTAGTGCCGCAGGAGTGACTAGACTGGGCTAGAAATTACCATGTCTCCTGCTGCTCAAGTGCTTATCAATGGGTCGG	miR-252a	coding
TRINITY_DN7266_c2_g1_i1	168	260	-	93(nt)	-32.20(kcal/mol)	CCCTGTTCCTAAGTACTAGTGCCGCAGGAGTGACTAGACTGGGCTAGAAATTACCATGTCTCCTGCTGCTCAAGTGCTTATCAATGGGTCGGG	miR-252a	coding
TRINITY_DN2850_c0_g2_i2	2553	2632	+	80(nt)	-32.30(kcal/mol)	AGTTGGGGCTCGTGCCAGATGCGCGTTTACACGGGCCCTGAATACTGTAAATGCACTATCTGGTACGACATCTCTTCTGT	miR-277	coding
TRINITY_DN3039_c0_g1_i1	2402	2481	+	80(nt)	-32.30(kcal/mol)	AGTTGGGGCTCGTGCCAGATGCGCGTTTACACGGGCCCTGAATACTGTAAATGCACTATCTGGTACGACATCTCTTCTGT	miR-277	coding
TRINITY_DN3039_c0_g1_i3	2584	2663	+	80(nt)	-32.30(kcal/mol)	AGTTGGGGCTCGTGCCAGATGCGCGTTTACACGGGCCCTGAATACTGTAAATGCACTATCTGGTACGACATCTCTTCTGT	miR-277	coding
TRINITY_DN6545_c0_g1_i1	1431	1510	+	80(nt)	-32.30(kcal/mol)	AGTTGGGGCTCGTGCCAGATGCGCGTTTACACGGGCCCTGAATACTGTAAATGCACTATCTGGTACGACATCTCTTCTGT	miR-277	coding
cluster_contig362	3625	3704	+	80(nt)	-32.30(kcal/mol)	AGTTGGGGCTCGTGCCAGATGCGCGTTTACACGGGCCCTGAATACTGTAAATGCACTATCTGGTACGACATCTCTTCTGT	miR-277	coding
cluster_contig1348	4113	4178	-	66(nt)	-29.50(kcal/mol)	GGACGATGTCTTCACCGGCCGTCCTGTTCCCAGGTCGGTGGGACTTTCGTCCGTTTGCAAAGGTCG	miR-278	coding
TRINITY_DN8324_c0_g3_i1	488	562	-	75(nt)	-34.20(kcal/mol)	GCTTAGTCAAATATCAGCTGGTAATTCTGGGCTGTTGTGAGTGACCCAGGATTCTGGCTGGTATGAGGCTACGTA	miR-283	coding
TRINITY_DN9199_c0_g2_i1	4	81	-	78(nt)	-34.60(kcal/mol)	TGGCTTAGTCAAATATCAGCTGGTAATTCTGGGCTGTTGTGAGTGACCCAGGATTCTGGCTGGTATGAGGCTACGTAC	miR-283	coding
TRINITY_DN38455_c0_g1_i1	1	76	-	76(nt)	-29.60(kcal/mol)	AGGCAGAGGTACTGACTTCTGTGAGTGCTGGGGTTCCCTTAAAACGTCCTAGCACCATTTGAAATCAGTACTGCTC	miR-29	coding
cluster_contig357	361	444	+	84(nt)	-40.10(kcal/mol)	ACCGGCGTGCTGGCAGTGTGGTTAGCTGGTTGTGTGATTCCCAACCAAAACACGACCGCTATCGACACTGCATTTACGACGGTC	miR-34	coding
TRINITY_DN11637_c0_g1_i3	184	278	-	95(nt)	-19.00(kcal/mol)	ATGGTACTTCCCTGGAGGGCAACTCCATTTGGGCCAATACTTGATTCGAAGTTGAGAAAGTTGAGACTGTGGAGGGTTTTTATGGACTGTGATTT	miR-3558	coding
TRINITY_DN38455_c0_g1_i1	1	72	+	72(nt)	-27.70(kcal/mol)	GAGCAGTACTGATTTCAAATGGTGCTAGGACGTTTTAAGGGAACCCCAGCACTCACAGAAGTCAGTACCTCT	miR-3587	coding
TRINITY_DN17674_c0_g1_i1	39	117	+	79(nt)	-30.60(kcal/mol)	CATCGCCAATACCAGAGAATCTAGCCTGTGAGATATCGGACGCGACGTCACAAGTTAGGGTCTCAGGGAACCGGCGAAG	miR-3588	coding
TRINITY_DN2487_c0_g2_i2	362	451	+	90(nt)	-31.30(kcal/mol)	TTTGGTCTGATACATCGGGCCCAGCGTGCAATAAACTTTGAATCATTATTTTATTAAGTTTGTTCGTTCGGCTCGAGTTACCAGATCGAT	miR-375	coding
TRINITY_DN2487_c0_g2_i3	362	451	+	90(nt)	-31.30(kcal/mol)	TTTGGTCTGATACATCGGGCCCAGCGTGCAATAAACTTTGAATCATTATTTTATTAAGTTTGTTCGTTCGGCTCGAGTTACCAGATCGAT	miR-375	coding
TRINITY_DN2701_c0_g1_i3	417	506	+	90(nt)	-31.30(kcal/mol)	TTTGGTCTGATACATCGGGCCCAGCGTGCAATAAACTTTGAATCATTATTTTATTAAGTTTGTTCGTTCGGCTCGAGTTACCAGATCGAT	miR-375	coding
TRINITY_DN3977_c0_g2_i2	8218	8309	-	92(nt)	-31.30(kcal/mol)	GTTTGGTCTGATACATCGGGCCCAGCGTGCAATAAACTTTGAATCATTATTTTATTAAGTTTGTTCGTTCGGCTCGAGTTACCAGATCGATC	miR-375	coding
TRINITY_DN5643_c0_g1_i2	226	315	+	90(nt)	-31.30(kcal/mol)	TTTGGTCTGATACATCGGGCCCAGCGTGCAATAAACTTTGAATCATTATTTTATTAAGTTTGTTCGTTCGGCTCGAGTTACCAGATCGAT	miR-375	coding
TRINITY_DN5643_c0_g1_i5	226	315	+	90(nt)	-31.30(kcal/mol)	TTTGGTCTGATACATCGGGCCCAGCGTGCAATAAACTTTGAATCATTATTTTATTAAGTTTGTTCGTTCGGCTCGAGTTACCAGATCGAT	miR-375	coding
cluster_contig10479	4683	4772	+	90(nt)	-31.30(kcal/mol)	TTTGGTCTGATACATCGGGCCCAGCGTGCAATAAACTTTGAATCATTATTTTATTAAGTTTGTTCGTTCGGCTCGAGTTACCAGATCGAT	miR-375	coding
cluster_contig4201	362	451	+	90(nt)	-31.30(kcal/mol)	TTTGGTCTGATACATCGGGCCCAGCGTGCAATAAACTTTGAATCATTATTTTATTAAGTTTGTTCGTTCGGCTCGAGTTACCAGATCGAT	miR-375	coding
TRINITY_DN277_c0_g2_i1	233	327	-	95(nt)	-32.20(kcal/mol)	CCGGCTACTCGGAGGCTTGTTGTTGTGGAGGATCTGAGGTCGGGGGTCACTATGGGTGCGGGATCCACGTTGACTGGGCGTCCGCGCTAAGCTCA	miR-3759	coding
cluster_contig3538	222	316	-	95(nt)	-32.20(kcal/mol)	CCGGCTACTCGGAGGCTTGTTGTTGTGGAGGATCTGAGGTCGGGGGTCACTATGGGTGCGGGATCCACGTTGACTGGGCGTCCGCGCTAAGCTCA	miR-3759	coding
TRINITY_DN568_c0_g1_i1	2246	2328	+	83(nt)	-37.10(kcal/mol)	ATACCGACGTAATCCTGCATCAAGTGCGTTGCGAGTGTAAATATAAGTTGCAATGCATTGCACGCAGGGTAGCGTTTGTGTGC	miR-3770	coding
cluster_contig11041	104	186	+	83(nt)	-37.10(kcal/mol)	ATACCGACGTAATCCTGCATCAAGTGCGTTGCGAGTGTAAATATAAGTTGCAATGCATTGCACGCAGGGTAGCGTTTGTGTGC	miR-3770	coding
TRINITY_DN16815_c0_g1_i15	346	434	+	89(nt)	-20.00(kcal/mol)	AATAGCTTGGAGTGCTCTTACTGTGACATCACGAATCAACTCTTCTAATAGGGATTCGCGATCTACGTTGGAGTTCACTGATAGTGTGG	miR-4071	coding
TRINITY_DN1258_c0_g2_i2	1	78	+	78(nt)	-48.60(kcal/mol)	ATATATATATATATGTGTGTGTGTATGTATATATATATATATATATATATACATACACACACACATATATATATATAT	miR-467e	coding
TRINITY_DN38957_c0_g1_i1	168	233	+	66(nt)	-23.50(kcal/mol)	TGCGTGATACTCACACTAGCATCGAATACCACGTGTGTGTGTTTGTGTGTGAGTGTTCATAACGCT	miR-574	noncoding
TRINITY_DN1498_c0_g1_i11	2471	2548	+	78(nt)	-29.00(kcal/mol)	TTCTGTCGTCAAACGGATCAAGCTTTTTGTGAGACTTGGATCAATCACAAAAAGCGGGATTCGCTTTTCGCATAGGAA	miR-6067	coding
TRINITY_DN1735_c0_g1_i6	55	132	+	78(nt)	-29.00(kcal/mol)	TTCTGTCGTCAAACGGATCAAGCTTTTTGTGAGACTTGGATCAATCACAAAAAGCGGGATTCGCTTTTCGCATAGGAA	miR-6067	coding
TRINITY_DN1956_c0_g1_i6	53	130	+	78(nt)	-29.00(kcal/mol)	TTCTGTCGTCAAACGGATCAAGCTTTTTGTGAGACTTGGATCAATCACAAAAAGCGGGATTCGCTTTTCGCATAGGAA	miR-6067	coding
TRINITY_DN2774_c0_g1_i5	51	128	+	78(nt)	-29.00(kcal/mol)	TTCTGTCGTCAAACGGATCAAGCTTTTTGTGAGACTTGGATCAATCACAAAAAGCGGGATTCGCTTTTCGCATAGGAA	miR-6067	coding
TRINITY_DN696_c0_g1_i12	1933	2010	-	78(nt)	-29.00(kcal/mol)	TTCTGTCGTCAAACGGATCAAGCTTTTTGTGAGACTTGGATCAATCACAAAAAGCGGGATTCGCTTTTCGCATAGGAA	miR-6067	coding
TRINITY_DN696_c0_g1_i5	2083	2160	-	78(nt)	-29.00(kcal/mol)	TTCTGTCGTCAAACGGATCAAGCTTTTTGTGAGACTTGGATCAATCACAAAAAGCGGGATTCGCTTTTCGCATAGGAA	miR-6067	coding
cluster_contig11296	2479	2556	+	78(nt)	-29.00(kcal/mol)	TTCTGTCGTCAAACGGATCAAGCTTTTTGTGAGACTTGGATCAATCACAAAAAGCGGGATTCGCTTTTCGCATAGGAA	miR-6067	coding
cluster_contig115	4282	4359	+	78(nt)	-29.00(kcal/mol)	TTCTGTCGTCAAACGGATCAAGCTTTTTGTGAGACTTGGATCAATCACAAAAAGCGGGATTCGCTTTTCGCATAGGAA	miR-6067	coding
cluster_contig391	11651	11728	+	78(nt)	-29.00(kcal/mol)	TTCTGTCGTCAAACGGATCAAGCTTTTTGTGAGACTTGGATCAATCACAAAAAGCGGGATTCGCTTTTCGCATAGGAA	miR-6067	coding
TRINITY_DN7742_c0_g1_i3	86	183	-	98(nt)	-23.60(kcal/mol)	ACGGCATTAGCCAGTTTGTTCTCAATCTCTTGACCTTGTGATCCACCTGCCTCGGCCTCCCAAAGTGCTGGGATTACAGGCATGAGCCACCGCGCCCA	miR-619	coding
TRINITY_DN231_c0_g1_i12	468	562	-	95(nt)	-26.20(kcal/mol)	GAAGCTCATGAGATTTATAGAATTATCGAGAAGGCTAAACTTTGCATGCTGAGAACTCAGTTGTTTGGGTGACATTTGTAGATCGAATGAGTTAT	miR-7202	coding
TRINITY_DN2905_c0_g1_i5	735	829	-	95(nt)	-26.20(kcal/mol)	GAAGCTCATGAGATTTATAGAATTATCGAGAAGGCTAAACTTTGCATGCTGAGAACTCAGTTGTTTGGGTGACATTTGTAGATCGAATGAGTTAT	miR-7202	coding
TRINITY_DN2905_c0_g1_i6	275	369	-	95(nt)	-26.20(kcal/mol)	GAAGCTCATGAGATTTATAGAATTATCGAGAAGGCTAAACTTTGCATGCTGAGAACTCAGTTGTTTGGGTGACATTTGTAGATCGAATGAGTTAT	miR-7202	coding
cluster_contig14139	605	699	-	95(nt)	-26.20(kcal/mol)	GAAGCTCATGAGATTTATAGAATTATCGAGAAGGCTAAACTTTGCATGCTGAGAACTCAGTTGTTTGGGTGACATTTGTAGATCGAATGAGTTAT	miR-7202	coding
cluster_contig7106	600	694	-	95(nt)	-26.20(kcal/mol)	GAAGCTCATGAGATTTATAGAATTATCGAGAAGGCTAAACTTTGCATGCTGAGAACTCAGTTGTTTGGGTGACATTTGTAGATCGAATGAGTTAT	miR-7202	coding
TRINITY_DN29383_c0_g1_i1	1245	1323	-	79(nt)	-22.00(kcal/mol)	CCAGGATATCCGTGGAGGACGAGGAGGATGATGATAGCTCCACCACGACTCGCCTTCTTGTCTGCATGAATTCTCCCTC	miR-7847	coding
TRINITY_DN19136_c0_g1_i1	154	239	+	86(nt)	-38.50(kcal/mol)	TGATTGTCGTGCAGGCGGAGATGAGCGCACTATTTGTGATTTTTTTGTATATCAAATTGCACTCGTCCCGGCCTGCGGGATTATCG	miR-92	coding
TRINITY_DN19136_c0_g1_i1	16	99	+	84(nt)	-34.80(kcal/mol)	TTGCATGAGAGATAGGTCGAGATATGTGACAATGTTTCCATGATCTTTGTAATATTGCACTTGTCCCGGCCTATCGAAGTGCAG	miR-92a	coding
TRINITY_DN31327_c0_g1_i1	1	72	-	72(nt)	-32.70(kcal/mol)	CACAGACGTCCGGGTTTCGTGACAAGCGAGCCGTCACTGTAATACGGGTTCGTTGTCGACGAAACCTGCACG	miR-981	noncoding
cluster_contig13481	1	69	+	69(nt)	-30.70(kcal/mol)	ACGTAGACTGAAGGTATCCGGAGTGTAATCCTGTCCGGTATACCTTCAGTATACGTAACAGGAGGCTAC	miR-iab	coding
cluster_contig13481	1	67	-	67(nt)	-30.60(kcal/mol)	AGCCTCCTGTTACGTATACTGAAGGTATACCGGACAGGATTACACTCCGGATACCTTCAGTCTACGT	miR-iab	coding
*Coding gene specifically identified in the parasitoid wasp.
