# Supplementary material for: De Novo Transcriptome Identifies Olfactory Genes in Diachasmimorpha longicaudata (Ashmead)
Source: Genes (Basel). 2020 Jan 29;11(2):144. doi: 10.3390/genes11020144 (PMC7074194; doi:10.3390/genes11020144)
Supplement: Supplementary file 1 [file genes-11-00144-s001.gz › Table S2.xlsx]

## Sheet: Sheet1
Table S2. Expression profile of transcripts encoding olfactory proteins.
TranscriptID	G1	G2	G3	M1	M2	M3	C1	C2	C3	Protien	Description
TRINITY_DN15518_c0_g2_i1	0	0	2.4	0	0	9.82	0	1.26	8.01	IR25A	Ionotropic receptor 25a
cluster_contig10267	57.89	0	42.73	0	8.27	14.43	33.19	4.67	0	CSP	chemosensory protein
TRINITY_DN20146_c0_g1_i1	0	0	0	0	0	4	0	0	1	LOC105269299	Odorant receptor
TRINITY_DN4104_c1_g1_i3	0	1.85	0	0	2.58	6.25	0	0.33	1	LOC105270483	Odorant receptor
TRINITY_DN22849_c0_g1_i1	0	0	4	0	2	5	0	1	2	OB69A	General odorant-binding protein 69a
cluster_contig1344	58.45	223.07	50.44	15.45	89.45	135.35	33.99	79.6	123.48	AZQ24964.1	chemosensory protein, partial
cluster_contig14210	0	0	0	2	0	0	0	0	0	LOC105270609	Odorant receptor
cluster_contig14284	575.97	1434.49	796.29	399.04	1100.09	1578.41	1520.3	755.9	875.81	AZQ24964.1	chemosensory protein, partial
TRINITY_DN7530_c0_g1_i1	0	0	0	0	0	0	0	3.91	0	LOC107037008	Odorant receptor
TRINITY_DN23357_c0_g1_i1	0	0	0	0	0	0	0	0	0	LOC107041471	gustatory receptor
TRINITY_DN4828_c0_g1_i2	0	0	0	0	0	0	0	0	3	LOC107039144 isoform X2	Odorant receptor
TRINITY_DN8035_c0_g2_i1	0	0	0	0	0	1	0	0	0	LOC105269621	gustatory receptor
TRINITY_DN2902_c0_g1_i1	912.81	1554.59	949.06	770.94	3549.46	4919.18	2647.94	697.18	3159.44	OB83A	General odorant-binding protein 83a
TRINITY_DN13633_c0_g2_i1	0	0	2	0	0	0	0	0	0	LOC107040339	Odorant receptor
TRINITY_DN32913_c0_g1_i1	0	0	0	0	0	0	4	0	0	LOC107041471	Odorant receptor
cluster_contig12468	851.43	9427.22	39817.7	2921.58	5249.95	62414.5	1181.72	11356.5	11979.4	LOC107043576	Odorant receptor
cluster_contig6330	2493.29	13507.2	108094	26203.8	8111.09	170414	108.23	11788	60418.1	LOC107043577	Odorant receptor
cluster_contig16781	1.84	124.6	234.14	51.62	29.13	244.95	27.24	17.82	162.62	LOC107043586	Odorant receptor
TRINITY_DN4337_c0_g1_i6	0	95.43	0	0	0	0	0	0	0	LOC107043586	Odorant receptor
TRINITY_DN6127_c0_g2_i1	0	0	0	0	0	0	0	0	0	IR21A	Ionotropic receptor 21a
TRINITY_DN4337_c0_g1_i12	31.36	0	2034.21	449.83	58.98	1334.33	753.39	123.2	446.84	LOC107043586	Odorant receptor
TRINITY_DN4407_c0_g1_i9	0	0	28.51	16.7	55.38	215.75	0	0	34.13	OR	Odorant receptor
TRINITY_DN1367_c1_g1_i3	248.03	0	255.53	107.03	213.88	461.34	213.03	430.42	515.03	OR	Odorant receptor
cluster_contig14285	0	0	0	0	148.62	0	0	235.76	52.91	AZQ24964.1	chemosensory protein, partial
TRINITY_DN2807_c1_g2_i1	0	0	0	0	0	0	0	0	0	OR1	odorant receptor Or1-like
TRINITY_DN5967_c0_g2_i1	14.49	10	15.79	5	14	23	2.2	3	22.19	OR1	Odorant receptor Or1
TRINITY_DN2413_c0_g1_i2	0	0	0	0	0	0	0	0	5.72	OR1	odorant receptor Or1-like
TRINITY_DN7102_c0_g1_i3	7.77	6	0	0	11.01	7	1	0	0	OR1	Odorant receptor Or1
TRINITY_DN35151_c0_g1_i1	0	0	7.64	0	1.07	1.16	13	0	5.03	OR1	Odorant receptor Or1
TRINITY_DN24901_c0_g1_i1	2	0	0	0	0.99	0	1	0	9	OR1	odorant receptor Or1-like
cluster_contig10052	9	7	6	1	23	23	26	8	3	OR1	odorant receptor Or1-like
TRINITY_DN8576_c0_g1_i2	0	0	0	0	1	0	0	0	0	OR1	odorant receptor Or1-like isoform X3
TRINITY_DN5018_c0_g2_i6	0	0	4.1	0	3.74	0	0	0	0	OR1	odorant receptor Or1-like
cluster_contig9808	0	0	0	42	67	20.96	0	16	0	OR1	Odorant receptor Or1
cluster_contig7693	25.32	73.52	0	17.83	27.09	21.2	29.19	6.52	32.04	OR1	odorant receptor Or1
cluster_contig9807	25	0	0	0	5	0	0	0	1	OR1	odorant receptor Or1-like
TRINITY_DN24760_c0_g1_i1	9	22	10	16	30	8	18	6	37	OR1	Odorant receptor Or1
TRINITY_DN30523_c0_g1_i1	0	0	0	0	0	0	2	0	0	OR1	odorant receptor Or1-like
TRINITY_DN7655_c0_g2_i2	0	0	6	0	13.04	0	0	1	6	OR1	odorant receptor Or1
TRINITY_DN3853_c0_g1_i7	0	0	0	0	0	1.83	5	0	1.1	OR1	odorant receptor Or1-like
TRINITY_DN4278_c0_g1_i9	0	3.6	0	0	20.5	0	6.77	23.68	2.07	OR1	odorant receptor Or1-like
TRINITY_DN2413_c1_g2_i1	0	8.17	5.93	0	2.42	15.97	12.29	0.8	12.81	OR1	Odorant receptor Or1
TRINITY_DN7526_c0_g1_i1	0	0	0	0	10.22	0	0	0	11.97	OR1	Odorant receptor Or1
TRINITY_DN2413_c0_g1_i1	15.25	0	15.84	10.96	5.34	4.43	12.12	0	21.13	OR1	odorant receptor Or1-like
cluster_contig9052	46.05	4	0	0	4.26	0	17.53	8.17	0	OR1	odorant receptor Or1
TRINITY_DN36024_c0_g1_i1	0	0	7	0	0	0	2	0	0	OR1	odorant receptor Or1-like
TRINITY_DN20951_c0_g1_i2	0	0	0	0	0	0	2	0	0	OR1	odorant receptor Or1-like (LOC107045218), mRNA
TRINITY_DN15867_c0_g2_i1	0	0	0	3	1	2	0	0	1	OR1	odorant receptor Or1-like
cluster_contig2075	0	5	5.36	6	1.71	9.84	0	2	0	OR1	Odorant receptor Or1
TRINITY_DN8889_c0_g1_i1	35.12	0	0	0	0	0	8.07	12.6	0	GR107	gustatory receptor Gr107
TRINITY_DN6833_c0_g1_i1	0	0	0	0	0	0	0	1	4	OR1	odorant receptor Or1-like
TRINITY_DN2493_c0_g2_i6	13.45	12.42	3.37	0	0	0	0	0	0	OR1	odorant receptor Or1-like
TRINITY_DN18162_c0_g1_i2	0	0	0	0	7	7	2.15	1	0	OR1	odorant receptor Or1
cluster_contig9219	7.51	69.43	0	16.99	33.15	8.88	7.58	22.63	0	GR107	gustatory receptor Gr107
cluster_contig12763	0	0	0	0	0	0	14.27	0	0	OB83A	General odorant-binding protein 83a
TRINITY_DN13912_c1_g2_i1	41.22	11.6	9.81	2.97	17.39	11.76	33.68	2.05	25.39	IR25A	Ionotropic receptor 25a
TRINITY_DN8317_c0_g1_i1	4.55	18.14	0	6.45	5.81	14.79	23.24	10.07	53.53	IR25A	Ionotropic receptor 25a
TRINITY_DN2807_c1_g1_i1	0	0	0	0	0	0	0	1	0	OR1	odorant receptor Or1-like
TRINITY_DN4652_c0_g1_i2	16.68	8.92	3.89	0	15.44	14.51	1.69	1.42	10.45	OR1	odorant receptor Or1-like
TRINITY_DN25124_c0_g1_i1	2	0	2	4	2	2	13	0	4	OR1	odorant receptor Or1-like
TRINITY_DN31395_c0_g1_i1	0	0	0	0	0	7	0	0	0	OR1	Odorant receptor Or1
TRINITY_DN15319_c0_g1_i1	5	18	9	2	7	18	13	0	21	OR1	Odorant receptor Or1
TRINITY_DN191_c0_g2_i1	0	0	1	0	0	0	0	0	0	OR1	odorant receptor Or1-like
TRINITY_DN11328_c0_g1_i1	9.86	32.73	80.68	21.97	49.59	46.24	55.76	52.62	26.99	IR25A	Ionotropic receptor 25a
TRINITY_DN4795_c0_g2_i1	3.34	8.39	0	5.44	45.5	56.08	8.22	27.86	0	IR25A	Ionotropic receptor 25a
TRINITY_DN7765_c0_g1_i1	0	0	0	0	0	0	0	0	0	OR1	odorant receptor Or1
TRINITY_DN5206_c0_g1_i2	0	0	0	2	0	0	0	2	0	OR1	odorant receptor Or1
TRINITY_DN3853_c0_g1_i5	1.45	0	9.04	3.03	8.96	0	1.84	0	2.41	OR1	odorant receptor Or1-like
cluster_contig13396	23	29.2	13.78	20	14.36	0	0	2.6	8.24	OR1	Odorant receptor Or1
TRINITY_DN34214_c0_g1_i1	0	0	2	0	0	3	5	4	0	OR1	odorant receptor Or1-like
TRINITY_DN1363_c0_g1_i2	0	3.51	4.5	0	5	8.5	0	11.28	11.15	OR1	odorant receptor Or1-like
TRINITY_DN8247_c0_g1_i4	4.45	0	0	1.75	21.85	6.12	10.57	10.93	6.69	OR1	odorant receptor Or1-like
cluster_contig9053	109.95	0	3	7	17.7	30	22.32	11.83	0	OR1	odorant receptor Or1
TRINITY_DN4707_c0_g1_i3	6	43	19	0	0	31.4	18	0	50.49	OR1	Odorant receptor Or1
TRINITY_DN5967_c0_g1_i2	0	0	0	0	0	0	1.95	0	0	OR1	Odorant receptor Or1
TRINITY_DN7102_c0_g1_i2	5.23	0	0	0	3	0	0	0	0	OR1	odorant receptor Or1-like
TRINITY_DN13907_c0_g1_i1	0	0	0	0	0	0	0	0	0	OR10a	odorant receptor 10a-like
TRINITY_DN16034_c0_g1_i1	0	0	0	0	0	0	0	0	2	OR10a	odorant receptor 10a-like
TRINITY_DN21853_c0_g2_i1	0	0	0	0	0	0	0	0	0	OR10a	odorant receptor 10a-like
TRINITY_DN14932_c0_g1_i2	9.99	5	5.87	4	25	36.03	0	0	0	OR10A	Odorant receptor 10a
TRINITY_DN12406_c0_g1_i1	0	0	0	1	1	0	3	0	0	OR10a	odorant receptor 10a-like
TRINITY_DN5019_c0_g1_i2	0	37.42	0	0	2.86	0	16.78	0	29.27	OR10A	Odorant receptor 10a
TRINITY_DN7459_c0_g1_i1	8	0	0	0	0	0	0	4	0	OR10a	odorant receptor 10a-like
TRINITY_DN4416_c0_g2_i1	0	4	2.99	0	0	0	7.86	0	0	GR28b	putative gustatory receptor 28b
TRINITY_DN7469_c0_g1_i1	0	0	0	0	4	0	0	0	2	OR10a	odorant receptor 10a-like
TRINITY_DN12124_c0_g1_i2	30.28	4.82	13.78	1.81	9.36	9.37	78.66	1.66	10.22	OR10A	Odorant receptor 10a
cluster_contig13282	5	7.8	35.9	16	14.28	10	21	4.21	2.01	OR10A	Odorant receptor 10a
cluster_contig14748	1184.74	5350.16	4502.92	1185.27	3512.37	7135.03	1605.13	1838.33	3741.53	THK33222.1	chemosensory protein 5
TRINITY_DN4324_c0_g1_i3	7.42	6.16	3.71	12.38	42.41	1.29	0	11.25	0.71	OR10A	Odorant receptor 10a
cluster_contig1601	6	6.57	0	27.65	21.87	5.33	0	7.15	29.49	THK33134.1	chemosensory protein 8
cluster_contig11456	11	1	3	0	1	5	2	6	2	OR10a	odorant receptor 10a-like
TRINITY_DN7459_c0_g2_i1	0	0	0	0	0	0	0	1	0	OR10a	odorant receptor 10a-like
TRINITY_DN39570_c0_g1_i1	0	0	0	0	0	0	6	0	0	OR10a	odorant receptor 10a-like
TRINITY_DN27819_c0_g2_i1	0	0	0	0	4.14	4.07	0	0	0	IR25A	Ionotropic receptor 25a
TRINITY_DN21853_c0_g1_i2	0	2	0	0	0	0	0	0	0	OR10a	odorant receptor 10a-like
cluster_contig16425	0	0	0	0	0	0	0	0	0	OR10a	odorant receptor 10a-like
TRINITY_DN19116_c0_g1_i1	0	0	2	0	1	7	0	0	4	OR10a	odorant receptor 10a-like
cluster_contig10636	26.3	9.26	0	32.02	7.43	35.57	20.85	8.09	11.82	OR10A	Odorant receptor 10a
cluster_contig11454	0	2	0	0	0	0	0	0	0	OR10a	odorant receptor 10a-like
TRINITY_DN2097_c0_g1_i2	0	0	0	0	5.48	44.83	36.15	24.66	0	OB56D	General odorant-binding protein 56d
TRINITY_DN19807_c0_g2_i1	0	0	0	0	0	0	4	0	0	OR10a	odorant receptor 10a-like
TRINITY_DN5019_c0_g1_i1	13	8.52	8	8.79	27.3	23.77	36	11	30.98	OR10A	Odorant receptor 10a
TRINITY_DN5284_c0_g1_i2	0	0	0	0	0	1	0	0	5.1	OR13a	odorant receptor 13a-like
cluster_contig1798	13.62	9.42	6.04	9.64	36.75	28.22	27.3	3.88	15.09	THK33220.1	chemosensory protein 3
cluster_contig1814	0	7.9	39.26	0	0	16.6	0	0	0	OR13A	Odorant receptor 13a
TRINITY_DN1046_c0_g1_i4	0	0	0	0	0	37.72	0	0	0	OR13A	Odorant receptor 13a
TRINITY_DN23826_c0_g1_i1	0	0	0	0	0	0	0	0	2	OR13a	Odorant receptor 13a
TRINITY_DN3641_c0_g2_i1	887.82	10701.5	3442.18	5808.6	12169	21245	165.5	10487.3	3862.08	OB69A	General odorant-binding protein 69a
TRINITY_DN15528_c0_g1_i2	0	0	0	8	9	9	0	0	5	OR13a	odorant receptor 13a-like
TRINITY_DN6431_c0_g1_i1	0	0	5	1	5.62	0	0	1.78	17.78	OR13A	Odorant receptor 13a
cluster_contig6516	0	0	0	12.33	0	0	0	0	0	OB56D	General odorant-binding protein 56d
TRINITY_DN19576_c0_g1_i1	1	5	1	7	6	5	1	0	7	OR13a	odorant receptor 13a-like
cluster_contig4356	0	0	0	0	2.17	0	3.05	1.79	0	OR13a	odorant receptor 13a-like
TRINITY_DN8604_c0_g1_i1	6	2.46	0	0	0.2	2.95	0	0	12	OR13A	Odorant receptor 13a
TRINITY_DN26666_c0_g1_i1	0	0	0	0	0	0	0	0	0	OR13a	odorant receptor 13a-like
TRINITY_DN31464_c0_g1_i1	0	0	0	0	0	0	0	0	0	OR13a	odorant receptor 13a-like
cluster_contig20	36.93	70.56	50.78	25.88	148.32	20.32	0	116.58	9.87	AZQ24964.1	chemosensory protein, partial
TRINITY_DN4615_c0_g1_i1	0	0	0	0	0	0	0	0	3	OR13a	odorant receptor 13a-like (LOC107040353), transcript variant X1, mRNA
TRINITY_DN3578_c0_g1_i4	0	20.79	0	3.14	62.62	28.3	5.24	6.55	6.13	OR13A	Odorant receptor 13a
TRINITY_DN11024_c0_g2_i1	0	0	0	0	3	0	0	3	0	OR13a	odorant receptor 13a-like isoform X2
TRINITY_DN12589_c0_g1_i2	0	20.02	7.07	0	0	0	0	27.93	0	OR13A	Odorant receptor 13a
TRINITY_DN24089_c0_g1_i1	0	0	0	0	0	0	0	0	0	OR13a	odorant receptor 13a-like
TRINITY_DN8643_c0_g2_i1	0	0	0	0	0	0	0	0	1	OR13a	odorant receptor 13a-like
TRINITY_DN4122_c0_g1_i3	0	21.61	0	7.19	22.86	0	28.87	2.82	4.2	OR13A	Odorant receptor 13a
TRINITY_DN22599_c0_g1_i1	0	0	0	1	0	0	1	0	3	OR13a	odorant receptor 13a-like
TRINITY_DN8643_c0_g1_i1	0	0	0	0	0	0	0	0	0	OR13a	odorant receptor 13a-like
TRINITY_DN17640_c0_g1_i1	0	0	0	0	0	0	0	0	0	GR28A	putative gustatory receptor 28a
TRINITY_DN6094_c0_g1_i1	0	0	2	0	0	2.31	0	5	0	OR13a	odorant receptor 13a-like
cluster_contig3738	1724.18	22918.8	22013.2	9236.08	17743.9	14277.7	21402.3	12946.5	28642.6	OB69A	General odorant-binding protein 69a
cluster_contig5610	3	5	2	5	8	18	1	0	3	OR13a	odorant receptor 13a-like
TRINITY_DN1796_c0_g1_i1	391.03	9578.2	7471.13	1989.86	6273.68	3087.22	1194.89	1265.75	3703.78	OB69A	General odorant-binding protein 69a
TRINITY_DN13236_c0_g1_i1	0	0	1	0	0	0	0	0	1	OR13a	odorant receptor 13a-like
TRINITY_DN38591_c0_g1_i1	0	2	5.36	3.67	3.2	17.29	21.58	0	1.41	OR13a	odorant receptor 13a-like
TRINITY_DN5284_c0_g1_i1	0	0	1	0	0	14	11.19	13.59	22	OR13a	odorant receptor 13a-like
cluster_contig3353	9.17	37.54	38	1.51	25.96	56.45	11.86	34.65	33.56	OB56D	General odorant-binding protein 56d
TRINITY_DN39365_c0_g1_i1	0	0	0	0	0	0	4	0	0	GR64A	Gustatory receptor for sugar taste 64a
cluster_contig8239	0	3.54	0	6	7.8	4.05	0	0	0	OR13A	Odorant receptor 13a
TRINITY_DN5481_c0_g1_i1	6.32	1.68	4.45	4.84	0	9.92	0	2.94	28.76	OR13A	Odorant receptor 13a
TRINITY_DN15975_c0_g1_i2	4	0	1	0	0	6	0	0	7.13	OR13a	odorant receptor 13a-like isoform X2
TRINITY_DN3559_c0_g1_i3	0	0	2	7	7.29	20.22	3.41	1	0	OR13a	odorant receptor 13a-like
TRINITY_DN22459_c0_g1_i1	0	0	2	1	0	0	1	0	7	OR13a	odorant receptor 13a-like
cluster_contig8505	28.13	63.29	27.88	6.84	49.85	47.27	52	29.23	37.51	IR25A	Ionotropic receptor 25a
TRINITY_DN23576_c0_g1_i1	0	0	0	0	0	0	0	0	0	OR13a	odorant receptor 13a-like
cluster_contig2812	295.53	0	0	31.4	32.22	51.34	0	51.72	19.47	AZQ24958.1	chemosensory protein, partial
TRINITY_DN34238_c0_g1_i1	0	0	0	0	0	0	1	0	0	OR13a	odorant receptor 13a-like
TRINITY_DN37390_c0_g1_i1	0	0	0	0	0	2	0	0	0	OR13a	odorant receptor 13a-like
cluster_contig5462	34.19	38.1	15.51	0	42.71	13.75	59	11.72	6.96	OR13A	Odorant receptor 13a
cluster_contig10129	0.14	37.15	35.64	0	11.41	29.57	12	0	15.9	OR13A	Odorant receptor 13a
TRINITY_DN12397_c0_g1_i1	0	0	0	0	0	0	0	0	4	OR13a	odorant receptor 13a-like
TRINITY_DN25480_c0_g1_i1	0	0	0	0	1	3.69	0	0	9	OR13a	odorant receptor 13a-like
TRINITY_DN5817_c0_g1_i2	3	0	0	0	0	0	0	0	0	OR13a	odorant receptor 13a-like (LOC107045316)
TRINITY_DN11936_c0_g1_i1	0	0	0	0	0	0	0	0	0	OR13a	odorant receptor 13a-like
TRINITY_DN25904_c0_g1_i1	0	0	0	0	0	0	0	0	2	OR13a	odorant receptor 13a-like
TRINITY_DN1216_c1_g1_i1	16.29	10.74	8.75	1.2	5.71	0	0	9.72	3.52	OR13a	odorant receptor 13a-like
TRINITY_DN7606_c0_g1_i2	0	0	0	0	0	0	3	0	0	OR13a	odorant receptor 13a-like
TRINITY_DN2802_c0_g3_i1	0	0	0	0	0	0	0	0	0	GR15	gustatory receptor 15
TRINITY_DN23723_c0_g2_i1	1.44	0	0	0	2.66	0	0	0	1.03	IR25A	Ionotropic receptor 25a
TRINITY_DN6456_c0_g1_i3	0	6.02	0	15.38	19.7	27.19	12.84	6.21	25.64	OR13A	Odorant receptor 13a
TRINITY_DN4615_c0_g3_i1	0	6	0	0	1	2	4	0	2.87	OR13a	odorant receptor 13a-like isoform X2
TRINITY_DN22958_c0_g1_i1	0	0	0	0	0	0	0	0	2	OR13a	odorant receptor 13a-like
TRINITY_DN23206_c0_g1_i1	2	0	0	0	0	0	0	0	1	OR13a	odorant receptor 13a-like
cluster_contig4270	2667.24	3067.43	1894.09	1162.25	3284.62	3613.02	4111.03	2295.21	2903.94	AZQ24958.1	chemosensory protein, partial
TRINITY_DN2526_c0_g2_i2	496.73	4079.36	3447.26	1317.73	1065.3	80.8	106.82	2032.73	948.85	OB83A	General odorant-binding protein 83a
cluster_contig8125	17.32	22	21.44	0	27.81	35.68	2.79	0	0	OR13A	Odorant receptor 13a
TRINITY_DN23520_c0_g1_i1	0	0	0	0	0	0	0	0	2	LOC107038380	gustatory receptor
TRINITY_DN7606_c0_g2_i1	0	0	0	0	0	0	2	0	0	OR13a	odorant receptor 13a-like
TRINITY_DN10889_c0_g1_i1	0	0	0	0	0.72	0	0	0	0	OR13a	odorant receptor 13a-like
cluster_contig7011	0	15.76	0	0	0	0	9.9	0	0	OR13A	Odorant receptor 13a
TRINITY_DN18862_c0_g2_i1	0	0	0	0	0	0	0	0	1	OR13a	odorant receptor 13a
TRINITY_DN6431_c0_g2_i1	0	0	0	0	0	0	0	0	0	OR13A	Odorant receptor 13a
TRINITY_DN7055_c0_g1_i1	0	0	0	0	0	0	0	0	0	OR13a	odorant receptor 13a-like
TRINITY_DN17865_c0_g1_i1	0	0	0	0	0	0	1	0	0	GR28B	Putative gustatory receptor 28b
TRINITY_DN28551_c0_g1_i1	0	0	0	0	0	0	3	0	0	OR13a	odorant receptor 13a-like
TRINITY_DN7421_c0_g1_i1	0	0	0	0	0	0	0	0	9.03	OR13a	odorant receptor 13a-like
TRINITY_DN461_c0_g4_i1	0	0	0	0	0	0	0	0	0	OR13a	odorant receptor 13a-like (LOC107036754), mRNA
TRINITY_DN4428_c0_g1_i6	0	0	0	0	3.24	0	0	0	2.68	OR13a	odorant receptor 13a-like
TRINITY_DN1214_c0_g2_i1	8.42	0	36.03	3.78	0	42.61	8.57	6.59	19.69	OR13A	Odorant receptor 13a
TRINITY_DN30433_c0_g1_i1	0	0	0	0	1	0	5	0	0	OR13a	odorant receptor 13a-like
cluster_contig6688	0	0	6.06	0	9.4	0	0	0	3.24	OR13A	Odorant receptor 13a
TRINITY_DN19991_c0_g1_i1	0	0	0	0	0	0	0	0	5	OR13a	odorant receptor 13a-like
TRINITY_DN6471_c0_g1_i2	0	0	2.45	0	2.46	5.71	0	0	0	OR13A	Odorant receptor 13a
TRINITY_DN13942_c0_g1_i1	0	0	0	3.72	0	0	15.38	5.22	28.01	OR13A	Odorant receptor 13a
TRINITY_DN20954_c0_g1_i1	0	0	0	0	0	0	0	0	5	GR2a	putative gustatory receptor 2a
TRINITY_DN19661_c0_g1_i1	0	0	0	0	0	0	0	0	6	OR13a	Odorant receptor 13a
TRINITY_DN39295_c0_g1_i1	0	2.64	0	0	1.66	9.72	6	0	0.09	OR13a	odorant receptor 13a
cluster_contig725	9.01	1	0	0	0	5.98	3.86	0	2.08	OR13a	odorant receptor 13a-like
TRINITY_DN8785_c0_g1_i1	0	0	0	0	0	0	6.23	0	0	OR13a	odorant receptor 13a-like
TRINITY_DN13633_c0_g1_i2	0	0	3	0	2	0	0	0	0	OR13A	Odorant receptor 13a
TRINITY_DN3053_c0_g1_i2	0	433	272.27	86.79	196.88	325.68	73.17	135.96	332.46	OBP72	General odorant-binding protein 72
TRINITY_DN11721_c0_g1_i1	7	0	0	3.81	1.93	6.8	0	0	7.96	OR13a	odorant receptor 13a-like
cluster_contig4579	0	3	0	0	179.95	293.53	0	0	0	THK33131.1	chemosensory protein 1
TRINITY_DN10344_c0_g1_i1	0	0	0	0	0	0	12	0	0	OR13a	odorant receptor 13a-like
cluster_contig14549	0	0	0	0	0	2	0	2	0	OR13a	odorant receptor 13a-like
TRINITY_DN5329_c0_g1_i2	6.01	0	0	4	0	32.32	0	0	4.08	OR13a	odorant receptor 13a-like
TRINITY_DN6750_c0_g1_i2	0	0	0	1	7	0	0	0	0	OR13A	Odorant receptor 13a
TRINITY_DN34526_c1_g1_i1	0	0	0	1	0	0	3	0	0	OR13a	odorant receptor 13a-like isoform X2
TRINITY_DN4652_c0_g1_i7	9.32	9.36	6.16	0	17.53	9.86	23.68	9	8.4	OR13A	Odorant receptor 13a
TRINITY_DN14061_c0_g1_i3	100.42	89.49	85.45	18.54	171.34	158.28	174.34	35.54	26.34	GR43a	gustatory receptor for sugar taste 43a-like
cluster_contig3118	118	40	65	4	88	44	38	1	56	OR13A	Odorant receptor 13a
TRINITY_DN21092_c0_g1_i1	0	0	0	0	0	0	0	0	2	OR13a	odorant receptor 13a-like
TRINITY_DN19581_c0_g1_i1	0	0	0	0	3	2	0	0	5	OR13a	Odorant receptor 13a
TRINITY_DN4481_c0_g1_i1	11	12	5	1	19	5	15	8	2.02	OR13a	odorant receptor 13a-like
TRINITY_DN36216_c0_g1_i1	2320.83	3901.28	4429.14	1691.39	3900.74	6482.88	3709.45	2047.32	6171.2	OB56H	General odorant-binding protein 56h
TRINITY_DN3289_c0_g1_i8	32.16	7.77	0	0	4.89	5.26	11.38	10.67	0	OR13a	odorant receptor 13a-like
TRINITY_DN3748_c0_g1_i5	0	0	0	1.75	0	9.46	0	0	1.56	OR13a	odorant receptor 13a-like
TRINITY_DN39400_c0_g1_i1	0	0	0	0	0	0	2	0	0	OR13A	Odorant receptor 13a
cluster_contig1238	0	11.67	8	2	17	16	10	4	1.01	OR13A	Odorant receptor 13a
TRINITY_DN16335_c1_g1_i1	0	0	0	0	0	0	0	0	0	GR02A	Putative gustatory receptor 2a
TRINITY_DN10792_c0_g1_i2	0	0	0	0	0	0	2	0	0	OR13a	odorant receptor 13a-like
TRINITY_DN28643_c0_g1_i1	0	4	0	0	0	4	9	0	0	OR13a	odorant receptor 13a-like
TRINITY_DN22440_c0_g1_i1	0	8	0	0	0	0	0	0	7	OR13a	odorant receptor 13a-like
TRINITY_DN8441_c0_g2_i1	0	0	0	0	0	0	3.47	0	0	OR13a	Odorant receptor 13a
TRINITY_DN6529_c0_g1_i2	5.5	0	9.4	0	0	0	0	2.59	2.54	OB56D	General odorant-binding protein 56h
TRINITY_DN14505_c0_g1_i1	0	0	0	0	0	0	0	0	0	OR13a	odorant receptor 13a-like
cluster_contig4905	460.56	222.74	457.83	0	1252.82	857.6	1506.81	100.47	1102.4	THK33176.1	chemosensory protein 6
TRINITY_DN5329_c0_g1_i1	0	2.54	0	0	7.3	0	0	0	3.92	OR13a	odorant receptor 13a-like
cluster_contig11544	1	13	3.55	0	11.92	2.29	0	3.22	7.22	OR13A	Odorant receptor 13a
TRINITY_DN35818_c0_g1_i1	0	0	0	0	0	0	6.59	0	0	OR13a	odorant receptor 13a-like
TRINITY_DN6434_c0_g1_i1	0	0	1	5	1	0	0	0	2	OR13a	odorant receptor 13a-like
TRINITY_DN8550_c0_g2_i1	0	0	0	0	3	0	0	0	0	OR13a	odorant receptor 13a-like
TRINITY_DN9119_c0_g1_i2	150.15	597.86	619.04	366.01	342.34	759.56	389.87	581.95	665.95	GR107	gustatory receptor Gr107
TRINITY_DN11102_c0_g1_i1	0	0	0	0	0	0	0	0	0	OR13a	odorant receptor 13a-like
TRINITY_DN25325_c0_g1_i1	0	0	0	0	0	0	0	0	5	OR13a	odorant receptor 13a-like
TRINITY_DN22382_c0_g2_i1	9.88	8	4	0	1.6	0	5	0	5	OR13a	odorant receptor 13a-like (LOC107036754), mRNA
TRINITY_DN9142_c0_g1_i1	0	0	0	0	1	0	1	0	0	OR13a	odorant receptor 13a-like
TRINITY_DN4855_c0_g1_i4	13.72	6.35	0	0	0	0	0.11	15.05	3.89	OR13a	odorant receptor 13a-like
TRINITY_DN13419_c0_g1_i2	0	5	6	0	4.35	18	3	0	0	OR13A	Odorant receptor 13a
TRINITY_DN17757_c0_g1_i1	3	0	0	0	0	0	1	2	0	OR13a	odorant receptor 13a-like
TRINITY_DN5062_c0_g1_i1	7.57	2.67	4.58	0	0	6	5.63	17.48	0	LOC105270483	gustatory receptor
cluster_contig12394	18.64	16.46	0	0	15.17	1.46	0	0	10.32	OR13a	odorant receptor 13a-like
TRINITY_DN3553_c0_g1_i4	4.26	14	7.62	2.3	9.15	15.3	36.29	12.4	29.73	OR13a	odorant receptor 13a-like
cluster_contig3252	35	8.77	5	3	14.34	15	13.53	0	28.21	OR13A	Odorant receptor 13a
TRINITY_DN4615_c0_g2_i1	0	0	0	0	3	0	2	0	9	OR13a	odorant receptor 13a-like isoform X2
TRINITY_DN18593_c0_g1_i1	0	0	0	0	0	0	0	6	0	OR13a	odorant receptor 13a-like (LOC107044108), mRNA
TRINITY_DN30991_c0_g1_i1	0	0	0	0	0	0	3	0	0	OR13a	odorant receptor 13a-like
TRINITY_DN13236_c0_g2_i1	0	0	0	0	0	0	0	0	1	OR13a	odorant receptor 13a-like
cluster_contig511	105.19	191.02	276.36	86.2	127.91	242.66	439.91	101.99	297.39	AZQ24964.1	chemosensory protein, partial
TRINITY_DN19875_c0_g1_i2	4	16.64	2	1	7	7	0	0	0	OR13A	Odorant receptor 13a
cluster_contig4982	0	4	0	3	0	8	0	0	2	OR13A	Odorant receptor 13a
TRINITY_DN26072_c0_g1_i1	0	0	0	0	0	0	0	0	5	GR66a	gustatory receptor for bitter taste 66a-like
TRINITY_DN15909_c0_g1_i1	0	1	0	0	0	2	0	0	2	OR13A	Odorant receptor 13a
TRINITY_DN6388_c1_g1_i1	0	0	0	0	0	0	0	0	0	OR13a	odorant receptor 13a-like
TRINITY_DN6569_c0_g1_i2	0	0	0	0	2.19	0	3.6	5	2.99	OR13A	Odorant receptor 13a
TRINITY_DN15688_c0_g1_i1	33	33.98	27.93	38	81	115	60	39.07	34	OR13A	Odorant receptor 13a
TRINITY_DN28534_c0_g1_i1	0	0	0	0	0	0	7	0	0	OR13a	odorant receptor 13a-like
cluster_contig14544	0	16	2	1.19	19.07	21.22	4.92	6.63	0	OR13A	Odorant receptor 13a
TRINITY_DN1354_c1_g1_i1	0	0	4	0	3	5	0	0	0	OR2	odorant receptor Or2-like
TRINITY_DN21466_c0_g1_i1	0	0	0	0	0	0	0	0	0	GR2a	putative gustatory receptor 2a
TRINITY_DN7134_c1_g1_i1	0	0	0	0	0	0	0	0	0	OR2	odorant receptor Or2-like
cluster_contig9305	0	24.32	5	4	9	8.51	1	0	2.68	OR2	odorant receptor Or2-like isoform X1
TRINITY_DN31630_c0_g1_i1	0	0	0	0	0	0	2	0	0	OR2	odorant receptor Or2-like
TRINITY_DN11541_c0_g1_i1	0	0	0	0	2	6	0	0	4	OR2	Odorant receptor Or2
cluster_contig11563	8	0	7	5	7.4	8	12.28	5.81	0	OR2	odorant receptor Or2-like
TRINITY_DN10707_c0_g3_i1	5	0	0	0	0	0	0	0	0	OR2	odorant receptor Or2-like
cluster_contig8065	0	1.23	0	0	4.19	7.58	4.73	5	2.51	OR2	odorant receptor Or2-like
TRINITY_DN11134_c0_g1_i2	0	2	0	6	0	1	1	0	0	OR2	odorant receptor Or2-like
cluster_contig11455	0	10	2	0	4	3	0	0	2	OR2	Odorant receptor Or2
cluster_contig5479	312.75	329.62	234.34	143.51	199.61	322.81	272.8	245.63	337.1	THK33176.1	chemosensory protein 6
TRINITY_DN4338_c0_g1_i2	6.22	0	0	0	3.4	0	0	0	0	GR107	Gr107; gustatory receptor Gr107
TRINITY_DN5405_c0_g1_i1	0	0	0	0	0	0	0	0	8	OR2	odorant receptor Or2-like
TRINITY_DN9004_c0_g1_i1	2	4.68	3	0	2	17.49	2	1	3.32	OR2	odorant receptor Or2-like
TRINITY_DN5902_c0_g1_i3	0	0	0	0	7.89	27.35	0	0	0	OR2	odorant receptor Or2-like
TRINITY_DN6140_c0_g1_i1	1.13	0	4.52	0	24.85	6.82	54.3	29.84	4.47	GR28B	Putative gustatory receptor 28b
TRINITY_DN15507_c0_g1_i1	0	1	3	0	1	0	1	0	3	OR2	odorant receptor Or2-like
cluster_contig6303	10	12	8.59	10	5	5.93	11	5	4	IR68a	putative chemosensory ionotropic receptor IR68a
cluster_contig36	470.64	162.81	236.84	54.12	0	77.34	0	0	92.86	GR43a	gustatory receptor for sugar taste 43a-like (LOC107042314)
TRINITY_DN6596_c0_g1_i2	0	0	0	1.85	0	0.46	0.61	0	0	IR25A	ionotropic receptor 25a
TRINITY_DN10313_c0_g1_i1	0	0	0	0	0	0	0	0	0	OR2	odorant receptor Or2-like (LOC107038174), mRNA
TRINITY_DN8110_c0_g2_i2	5.3	0	46.74	0	0	0	0	0	4.78	OR2	odorant receptor Or2-like
cluster_contig6356	2216.05	2338.74	1526.78	708.98	2710.4	1520.05	894.01	910.59	963.31	AZQ24964.1	chemosensory protein, partial
cluster_contig3053	7.25	0	0	0	0	0	7.12	0	5.57	LOC105192322	gustatory receptor
TRINITY_DN15606_c0_g1_i1	0	0	0	0	0	0	0	0	0	IR93A	Ionotropic receptor 93a
TRINITY_DN10266_c0_g1_i1	0	0	0	0	0	0	0	0	0	IR21A	Ionotropic receptor 21a
TRINITY_DN23011_c0_g2_i1	0	0	0	0	0	0	0.95	0.97	0	OR2	odorant receptor Or2-like
TRINITY_DN6569_c0_g1_i4	0	0	7.53	0	0.06	0	0	2.19	6.96	OR2	odorant receptor Or2-like
TRINITY_DN26456_c0_g1_i1	0	0	0	0	0	0	0	0	4	IR21A	Ionotropic receptor 21a
TRINITY_DN6569_c0_g2_i1	0	0	0	0	0	6	0	0	0	OR2	odorant receptor Or2-like
TRINITY_DN4104_c1_g1_i6	5	5.59	0	1.88	5.73	0	4.16	0	6	LOC105270483	gustatory receptor
TRINITY_DN5902_c0_g1_i5	8.12	0	3.73	0	14.37	0	0	1.66	7.34	OR2	odorant receptor Or2-like
TRINITY_DN17811_c0_g1_i2	0	0	0	0	0	0	2	0	0	OR2	odorant receptor Or2-like
cluster_contig6988	13.1	8.43	7.08	0	9.46	3.58	6.87	0	2.35	THK33222.1	chemosensory protein 5
TRINITY_DN24202_c0_g1_i1	0	0	0	0	0	0	0	0	0	OR2	odorant receptor Or2-like
TRINITY_DN10868_c0_g2_i2	0	0	0	11	0	0	0	0	0	OR2	odorant receptor Or2-like
TRINITY_DN8110_c0_g2_i3	0	0	0	7.78	0	1.3	0	0	0	OR2	odorant receptor Or2-like
TRINITY_DN10868_c0_g1_i3	0	0	0	2	0	0	0	0	0	OR2	odorant receptor Or2-like
cluster_contig7018	933.29	312.56	603.12	284.47	463.75	778.86	286.76	406.95	497.66	AZQ24964.1	chemosensory protein, partial
TRINITY_DN7796_c0_g1_i1	0	7	0	0	12.6	8	1.77	6.22	6	OR2	odorant receptor Or2-like
TRINITY_DN7688_c0_g1_i2	3	0	0	0	0	0	0	0	0	OR2	odorant receptor Or2-like
TRINITY_DN23613_c0_g1_i1	0	0	0	0	0	0	0	0	1	OR2	Odorant receptor Or2
TRINITY_DN3807_c0_g1_i3	6.03	36.83	20.44	8.86	15.86	33.96	0	45.65	6.33	OB83A	General odorant-binding protein 83a
cluster_contig8943	1813.9	1464.19	887.39	504.83	1215.45	664.12	115.15	89.81	1704.64	THK33176.1	chemosensory protein 6
cluster_contig7225	7.12	9.16	44.91	0	3.53	49.01	3.16	0	7.48	OR2	odorant receptor Or2-like
TRINITY_DN12644_c0_g2_i1	0	0	1	0	0	0	0	0	2	OR2	Odorant receptor Or2
TRINITY_DN17811_c0_g1_i1	0	0	0	0	0	0	1	0	0	OR2	odorant receptor Or2-like
TRINITY_DN22499_c0_g1_i1	0	0	0	0	0.99	0	0	0	3.38	OR2	odorant receptor Or2-like
TRINITY_DN6569_c0_g1_i6	0	0	0	0	4.04	27.66	0	0	7.15	OR2	odorant receptor Or2-like
TRINITY_DN6112_c0_g1_i1	0	3.73	2.54	3	0	0	0	0	2.8	OR22B	Odorant receptor 22b
TRINITY_DN6211_c0_g1_i1	2.75	6.87	0	0	0	1.33	0	8.61	3.72	IR25A	Ionotropic receptor 25a
TRINITY_DN5844_c1_g1_i3	3	0	6.38	0	27.52	0	5.89	0	2.59	OR22B	Odorant receptor 22b
TRINITY_DN35512_c0_g1_i1	0	4.63	1.32	2.93	2.86	2.77	9.85	0.96	0	OR22B	Odorant receptor 22b
TRINITY_DN4631_c0_g1_i1	13	5.52	14	7.76	24.57	11.37	0	4.13	32.9	OR22B	Odorant receptor 22b
TRINITY_DN12903_c0_g2_i1	0	0	0	0.07	0	0	0.46	0	2.42	OR22B	Odorant receptor 22b
TRINITY_DN4210_c0_g2_i1	0	4	1	4	3	13.46	6	8	4	GR2a	putative gustatory receptor 2a
TRINITY_DN15253_c0_g1_i1	3	10	0	3	14	11	0	0	20	OR22B	Odorant receptor 22b
TRINITY_DN31508_c0_g1_i1	0	0	0	0	0	6.45	17	0	0	OR22B	Odorant receptor 22b
cluster_contig134	5	36	17	7	19	12	15	2.99	8.18	OR22B	Odorant receptor 22b
TRINITY_DN8720_c0_g4_i1	0	0	0	0	0	0	0	0	0	GR28b	putative gustatory receptor 28b
TRINITY_DN1005_c0_g1_i1	304.19	159.6	111.06	282.28	271.99	433.16	0	178.38	602.91	AZQ24964.1	chemosensory protein, partial
TRINITY_DN5844_c0_g1_i2	0	1.81	0	2.24	1.43	0	0	0	0.81	OR22B	Odorant receptor 22b
cluster_contig2514	0	1.37	8.74	0	15.63	14.23	11.14	3.13	22.37	OR22B	Odorant receptor 22b
TRINITY_DN3485_c0_g2_i2	0	0	0	0	0	25.18	0	1.87	5.29	OR22B	Odorant receptor 22b
TRINITY_DN15518_c0_g3_i1	1.65	0	3.8	0	1.08	0	0	0.13	0	IR25A	Ionotropic receptor 25a
cluster_contig14062	19.33	14.09	5.26	2	0	0	3.87	0	3.8	OR22c	odorant receptor 22c-like
TRINITY_DN17594_c0_g3_i1	0	0	0	0	0	0	0	0	2	OR22c	odorant receptor 22c-like
cluster_contig10865	0	0	0	0	0	0	0	0	0	OR22c	odorant receptor 22c-like
TRINITY_DN8440_c0_g1_i2	1	2.89	2	2	3	12	15.24	9.38	0	OR22c	odorant receptor 22c-like
TRINITY_DN9967_c0_g2_i1	0	0	0	0	2	0	2	0	0	OR22c	odorant receptor 22c-like
TRINITY_DN7257_c0_g1_i1	0	0	0	0	0	0	0	0	0	OR22c	odorant receptor 22c-like
TRINITY_DN9548_c0_g1_i2	0	6.67	5	7	1.13	6	28.08	1	2	OR22c	odorant receptor 22c-like
TRINITY_DN23720_c0_g1_i1	10	5	2	0	7	0	9	0	13	OR22C	Odorant receptor 22c
TRINITY_DN8131_c0_g1_i1	2	2	0	0	3	6	0	1	8	OR22c	odorant receptor 22c-like
TRINITY_DN4329_c0_g1_i7	9.17	0	10.78	4.86	5.49	17.92	18.32	0	15.39	IR25A	ionotropic receptor 25a
TRINITY_DN17594_c0_g2_i1	12	8	8	2	22	17	2	2	28	OR22c	odorant receptor 22c-like
TRINITY_DN1005_c0_g1_i4	225.96	26.87	64.83	41.17	149.88	0	0	64.93	206.23	AZQ24964.1	chemosensory protein, partial
TRINITY_DN15909_c0_g2_i1	0	0	0	0	0	0	0	0	1	OR22c	odorant receptor 22c-like
TRINITY_DN2683_c0_g1_i4	0	0	0	0	248.49	0	0	0	36.56	OR22c	odorant receptor 22c-like (LOC107042002), mRNA
TRINITY_DN17521_c0_g1_i1	0	0	0	0	0	0	0	0	0	OR22c	odorant receptor 22c-like
TRINITY_DN10541_c0_g1_i1	0	0	0	0	0	0	0	0	0	OR22c	odorant receptor 22c-like
TRINITY_DN26411_c0_g1_i1	0	0	0	0	0	0	0	0	2	OR22c	odorant receptor 22c-like
TRINITY_DN9795_c1_g1_i1	0	1	0	0	1	0	0	0	0	OR22c	odorant receptor 22c-like
TRINITY_DN7006_c0_g2_i2	0	0	10.41	0	0	5	0	0	0	OR22c	odorant receptor 22c-like
TRINITY_DN21026_c0_g1_i1	0	0	0	0	0	0	0	0	0.93	GR2a	putative gustatory receptor 2a
TRINITY_DN5949_c1_g1_i1	0	1.33	5	2	0	3	0	0	0	OR22c	odorant receptor 22c-like
TRINITY_DN6914_c0_g2_i1	0	0	0	0	0	0	0	0	0	OR22c	odorant receptor 22c-like
TRINITY_DN13412_c0_g1_i1	0	0	0	0	0	0	0	0	0	OR22c	odorant receptor 22c-like
TRINITY_DN1011_c1_g1_i1	0	0	0	0	2	0	2	0	0	IR68a	putative chemosensory ionotropic receptor IR68a
TRINITY_DN25035_c0_g1_i1	0	863.04	126.19	245.08	273.36	60.81	912.63	745.89	62.18	OB56H	General odorant-binding protein 56h
TRINITY_DN18053_c1_g1_i1	0	0	0	0	3	0	0	0	0	OR22c	odorant receptor 22c-like
TRINITY_DN533_c1_g1_i2	0	0	0	0	1	0	0	0	1	OR22c	odorant receptor 22c-like
TRINITY_DN3748_c0_g1_i2	0	4.63	2.14	3.72	6.39	13.12	0	11.38	0	OR22c	odorant receptor 22c-like
TRINITY_DN6893_c0_g1_i1	0	0	0	0	0	0	0	0	0	OR22c	odorant receptor 22c-like
TRINITY_DN5763_c0_g1_i1	4	0	0	0	1	0	1	1	14	OR22c	odorant receptor 22c-like
TRINITY_DN1011_c1_g2_i1	0	0	0	0	5	3	0	0	0	IR68a	putative chemosensory ionotropic receptor IR68a
TRINITY_DN24073_c0_g1_i1	0	0	0	0	0	0	0	0	0	OR22c	odorant receptor 22c-like
TRINITY_DN2688_c0_g1_i5	0	0	1	4	1.04	5.57	6	1.04	1.04	OR22c	odorant receptor 22c-like
TRINITY_DN6370_c0_g1_i1	0	0	0	0	0	0	0	0	3	OR22c	odorant receptor 22c-like
TRINITY_DN1018_c0_g1_i5	162.55	20880.1	12154.6	5886.17	22106.7	18868	7086.11	12863.4	10142.3	CSP	chemosensory protein
cluster_contig15198	0	7	3	0	0	0	0	0	0	OR22c	odorant receptor 22c-like
cluster_contig11575	1	0	0	0	4	0	0	0	0	OR22c	odorant receptor 22c-like
TRINITY_DN3133_c0_g1_i5	2	0	0	2	1.01	0	1	1.03	6.13	OR22c	odorant receptor 22c-like
TRINITY_DN4375_c0_g1_i2	0	0.83	3.69	0	0	0	14.71	0	0	OR22c	odorant receptor 22c-like
TRINITY_DN6047_c0_g1_i1	0	0	0	0	0	0	3	0	0	OR22c	odorant receptor 22c-like
TRINITY_DN2683_c0_g1_i1	0	0	0	0	29.78	25.06	67.03	13.63	0	OR22c	odorant receptor 22c-like (LOC107042002), mRNA
TRINITY_DN26623_c1_g1_i1	0	0	0	0	0	0	0	0	0	OR1FC_HUMAN	Olfactory receptor 1F12
TRINITY_DN9548_c0_g1_i1	0	6	0	0	3.87	0	5.92	0	0	OR22c	odorant receptor 22c-like
TRINITY_DN38603_c0_g1_i1	0	0	0	0	0	0	5	0	0	GR64e	gustatory receptor for sugar taste 64e-like
TRINITY_DN13419_c0_g2_i1	0	0	0	0	0	6	4	0	0	OR23a	odorant receptor 23a isoform X1
TRINITY_DN1306_c0_g1_i12	62.73	73.9	136.7	33.79	193.05	73.99	184.09	33.4	269.98	THK33176.1	chemosensory protein 6
TRINITY_DN25186_c0_g1_i1	0	0	0	0	3.65	5	0	0	7	OR23a	odorant receptor 23a isoform X1
TRINITY_DN39971_c0_g1_i1	0	0	0	0	0	0	1	0	0	OR245	odorant receptor 245
TRINITY_DN16270_c0_g1_i1	0	0	1	0	3	0	0	0	7	OR245	odorant receptor 245
TRINITY_DN26765_c0_g1_i1	0	0	0	0	0	0	0	0	3	OR24a	odorant receptor 24a-like
TRINITY_DN5692_c0_g1_i2	956.38	2512.8	2467.95	1113.35	1834.02	2464.62	2117.87	1926.48	3119.11	OB56A	General odorant-binding protein 56a
TRINITY_DN9951_c0_g1_i1	0	0.23	1	0	1.66	0	0	1	9.79	OR24a	odorant receptor 24a-like
TRINITY_DN23164_c0_g1_i1	0	0	0	0	1	0	0	0	1	LOC107038269	gustatory receptor
TRINITY_DN8549_c0_g1_i2	0	0	1	0	0	0	5	0	0	OR24a	odorant receptor 24a-like
TRINITY_DN8720_c0_g1_i1	2	0	0	0	0	0	0	0	1	GR28b	putative gustatory receptor 28b
TRINITY_DN9296_c0_g1_i1	0	7	0.98	0	1	0	0	0	5	OR24a	odorant receptor 24a-like
TRINITY_DN23918_c0_g1_i1	6	0	0	0	3	3	8	0	4	OR24a	odorant receptor 24a-like
TRINITY_DN10792_c0_g1_i1	0	0	0	0	0	0	4	0	0	OR24a	odorant receptor 24a-like
TRINITY_DN9113_c0_g2_i1	0	0	0	2	0	0	0	0	0	OR24a	odorant receptor 24a-like
TRINITY_DN12150_c0_g1_i1	0	0	0	0	0	0	0	0	5	OR24a	odorant receptor 24a-like
TRINITY_DN1347_c0_g1_i4	261.73	402.08	214.74	45.22	30.52	241.54	509.75	0	0	AZQ24964.1	chemosensory protein, partial
TRINITY_DN25147_c0_g1_i1	0	2	0	0	0	0	0	0	7	OR260	odorant receptor 260
TRINITY_DN20822_c0_g1_i1	0	0	0	0	0	0	0	0	9.72	OR266	odorant receptor 266
TRINITY_DN8698_c0_g1_i2	1	0	2	0	11.28	0	0	0	3.28	OR266	odorant receptor 266
cluster_contig12229	0	2	0	0	1	0	0	0	2	OR277	odorant receptor 277
TRINITY_DN147_c0_g1_i10	0	0	0	0	0	0	0	0	0	THK33176.1	chemosensory protein 6
TRINITY_DN29065_c0_g1_i1	0	0	0	0	0	0	1.73	0	0	OR2a	odorant receptor 2a-like (LOC105268607
TRINITY_DN12589_c0_g2_i1	0	0	0	0	0	0	0	0	0	OR2a	odorant receptor 2a-like
TRINITY_DN10678_c0_g1_i1	0	0.2	4.1	0	0	0	0	1.79	0	OR2A	Odorant receptor 2a
TRINITY_DN10253_c0_g1_i2	0	0	0	0	0.18	0	0	0	0	OR2A	Odorant receptor 2a
TRINITY_DN10253_c0_g2_i2	0	0	1	7.15	7.02	6	3	5.97	16	OR2A	Odorant receptor 2a
TRINITY_DN8411_c0_g1_i1	0	0	0	0	0	0	0	0	4	OR2A	Odorant receptor 2a
TRINITY_DN7939_c0_g1_i3	0	0	0	0	3	2	1	0	1	OR2A	Odorant receptor 2a
TRINITY_DN25709_c0_g1_i1	0	3.36	0	0	0	0	0	3	4	OR2A	Odorant receptor 2a
TRINITY_DN7560_c0_g1_i1	6.39	0	1	7	2.09	0	12.74	0	4.06	GR23a	putative gustatory receptor 23a, isoform B
cluster_contig13563	0	15	0	0	23.32	13	4.17	1.98	0	OR2A	Odorant receptor 2a
TRINITY_DN5872_c0_g1_i3	0	0	1.09	0	3.44	7.93	0	0	0	OR30a	odorant receptor 30a-like
TRINITY_DN16683_c0_g1_i1	0	0	0	0	0	0	0	0	2	OR30a	odorant receptor 30a-like
cluster_contig3054	5.61	0	0	1	0	10.98	8.43	0	2	OR30a	odorant receptor 30a-like (LOC107046892), mRNA
cluster_contig8205	0	5	0.77	0	13.87	4.33	12.18	0	0	OR30a	odorant receptor 30a-like
TRINITY_DN5872_c0_g1_i2	1	0	6.1	0	0	14.38	0.77	3	1	OR30a	odorant receptor 30a-like
TRINITY_DN15043_c0_g1_i1	0	0	0	0	0	0	0	0	0	OR30a	odorant receptor 30a-like (LOC107047367), mRNA
TRINITY_DN147_c0_g1_i9	163.66	6.09	93.79	87.79	9.09	161.17	171.66	0	0	THK33176.1	chemosensory protein 6
TRINITY_DN17603_c0_g1_i1	0	0	0	0	0	0	0	0	2	OR30a	odorant receptor 30a-like
TRINITY_DN9736_c0_g1_i1	0	0	0	0	0	0	0	1.01	0	OR30A	Odorant receptor 30a
TRINITY_DN28749_c0_g1_i1	0	5	0	0	0	0	4	0	0	OR30a	odorant receptor 30a-like
TRINITY_DN14352_c1_g1_i1	0	0	0	0	0	0	0	0	2	OR30a	odorant receptor 30a-like
TRINITY_DN3681_c0_g2_i1	0	0	0	0	0	2.95	0	0	0	GR43A	Gustatory receptor for sugar taste 43a
TRINITY_DN6207_c0_g1_i1	0	0	0	0	0	0	0	1	5	OR30a	odorant receptor 30a-like
TRINITY_DN16128_c0_g1_i1	0	0	0	0	0	0	0	0	0	OR30a	odorant receptor 30a-like
TRINITY_DN2824_c0_g1_i5	3.18	2.39	2.54	0	3.41	12.11	0	3.33	22.02	OR30a	odorant receptor 30a-like (LOC107046892), mRNA
TRINITY_DN1685_c0_g1_i1	680.34	900.38	548.04	474.86	371.93	878.29	905.12	410.91	1877.69	CSP	chemosensory protein
TRINITY_DN9300_c0_g1_i1	0	0	0	0	0	0	0	0	0	OR30a	odorant receptor 30a-like
TRINITY_DN2824_c0_g1_i2	6.68	12.15	12.5	12	7.19	0	30.39	0	30.13	OR30a	odorant receptor 30a-like (LOC107046892), mRNA
TRINITY_DN5369_c0_g1_i4	1.77	5	2	0	1	1	0	0	0.89	OR33a	odorant receptor 33a-like
TRINITY_DN16232_c0_g1_i2	0	0	0	0	0	0	0	0	0	OR33a	odorant receptor 33a-like
TRINITY_DN1696_c0_g1_i2	54.1	122.2	152.63	67.57	368.85	62.56	1112	67.57	418.01	CSP	chemosensory protein
TRINITY_DN17991_c0_g2_i1	0	0	0	0	0	0	0	0	0	OR33b	odorant receptor 33b-like
TRINITY_DN4374_c0_g1_i4	9.99	15.16	29.18	21.67	32.16	7.8	6.27	0	27.34	OB83A	General odorant-binding protein 83a
TRINITY_DN31297_c0_g1_i1	0	0	0	0	0	0	1	0	0	OR33b	odorant receptor 33b-like
TRINITY_DN22442_c0_g1_i1	0	0	0	0	0	0	0	0	3	OR33b	odorant receptor 33b-like
TRINITY_DN1848_c0_g1_i6	581.2	11308.6	3473.26	2829.29	788.94	6123.59	1563.35	2984.68	10210.5	CSP	chemosensory protein
TRINITY_DN3959_c0_g1_i3	1	4	0	0	1	0	2	0	10	OR33b	odorant receptor 33b-like
TRINITY_DN10490_c0_g1_i1	0	0	1	0	0	0	2	0	2	OR4	odorant receptor 4-like
TRINITY_DN21454_c3_g1_i1	0	0	0	0	0	3	0	0	0	OR1FC_HUMAN	Olfactory receptor 1F12
TRINITY_DN1848_c0_g1_i7	47.41	0	34.86	45.68	53.66	10.01	43.55	9.66	45.75	CSP	chemosensory protein
TRINITY_DN4828_c0_g2_i1	0	0	0	0	0	0	0	0	7	OR4	odorant receptor 4-like
TRINITY_DN25945_c0_g2_i1	0	0	0	0	0	7	2	0	0	OR4	odorant receptor 4-like
TRINITY_DN30734_c0_g1_i1	1	0	4	3	6	1	0	0	0	OR4	odorant receptor 4-like
TRINITY_DN12678_c0_g1_i1	0	0	0	0	0	12	0	0	0	OR4	odorant receptor 4-like
TRINITY_DN4681_c0_g3_i4	0	0	3.32	0	0	6.48	0	3.81	0	OR4	odorant receptor 4-like
TRINITY_DN25222_c0_g2_i1	0	0	0	0	0	0	2	0	0	OR4	odorant receptor 4-like
TRINITY_DN17709_c0_g1_i1	1	3	2	3	2	0	4	0	17	OR4	odorant receptor 4
TRINITY_DN5546_c0_g1_i2	0	0	0	0	0	0	6	1	0	OR4	odorant receptor 4 (LOC107044764), mRNA
TRINITY_DN12401_c0_g2_i1	0	0	0	0	0	0	0	0	0	GR28a	putative gustatory receptor 28a
TRINITY_DN1884_c0_g1_i2	0	17.42	59.53	0	10.64	0	0	42.76	0	CSP	chemosensory protein
cluster_contig6609	2	2	0	0	1	0	0	0	0	OR4	odorant receptor 4
TRINITY_DN16093_c0_g3_i1	0	0	0	0	0	0	0	0	0	OR4	odorant receptor 4-like
TRINITY_DN20971_c0_g1_i1	0	0	0	0	0	2	0	0	6	OR4	odorant receptor 4-like
TRINITY_DN27558_c0_g1_i1	0	0	0	0	0	0	0	1	0	OR4	odorant receptor 4
TRINITY_DN14334_c0_g2_i1	3	0	0	0	0	0	0	0	4	Gr15	gustatory receptor 15
TRINITY_DN39272_c0_g1_i1	0	0	0	0	0	0	2	0	0	OR4	odorant receptor 4-like
TRINITY_DN15811_c0_g1_i1	0	0	0	0	0	0	0	0	2	OR4	odorant receptor 4
TRINITY_DN9011_c0_g2_i1	0	0	0	0	3	7	0	0	0	OR4	odorant receptor 4
TRINITY_DN23468_c0_g1_i1	0	0.33	0	0	0	0	0	0	3.99	OR4	odorant receptor 4-like
cluster_contig13855	1.55	0	3	0	0	0	0	0	3	OR4	odorant receptor 4-like
TRINITY_DN19670_c0_g1_i1	0	0	0	0	0	0	0	0	2	OR4	odorant receptor 4-like
TRINITY_DN1716_c0_g2_i1	0	0	0	0	0	0	0	0	0	OR4	odorant receptor 4-like
TRINITY_DN1903_c0_g1_i2	173.47	438.75	661.96	219.44	246.25	968.96	294.86	517.38	198.96	CSP	chemosensory protein
TRINITY_DN38092_c0_g1_i1	0	0	0	0	0	0	4	0	0	OR4	odorant receptor 4-like
TRINITY_DN35175_c0_g1_i1	0	0	0	0	0	0	3	0	0	OR4	odorant receptor 4-like
TRINITY_DN31638_c0_g1_i1	0	0	0	0	1	0	0	0	0	OR4	odorant receptor 4-like
TRINITY_DN6567_c0_g2_i1	26.33	15.64	10.05	9.93	0	13.98	0	28.4	32.73	IR25A	Ionotropic receptor 25a
TRINITY_DN21401_c0_g1_i2	45.38	101	0	14.68	70.97	97	22.61	45.08	63.14	THK32840.1	chemosensory protein 7
TRINITY_DN23793_c0_g1_i1	0	0	2.2	0	0	0	0	0	59.21	THK33220.1	chemosensory protein 3
TRINITY_DN22_c0_g3_i1	5531.14	52200.5	66825	23546.6	31608.2	109902	16144.1	42604.7	58936.4	OB56D	General odorant-binding protein 56d
TRINITY_DN6596_c0_g2_i1	15.47	8	0	3.63	12.45	4.01	7.64	0	9.47	IR25A	ionotropic receptor 25a
TRINITY_DN13671_c0_g1_i1	0	0	0	0	0	0	0	0	3	OR4	Odorant receptor 4
TRINITY_DN5466_c0_g1_i1	0	0	0	0	0	0	0	0	0	OR4	odorant receptor 4-like
TRINITY_DN18254_c0_g1_i1	0	0	0	0	0	0	0	3	0	OR24	olfactory receptor 24
TRINITY_DN21556_c0_g3_i1	8	0	0	0	0	0	0	0	0	OR4	odorant receptor 4-like
TRINITY_DN15797_c0_g1_i1	0	0	0	0	0	0	0	0	0	OR4	odorant receptor 4-like
TRINITY_DN7686_c0_g1_i3	15.23	3	25.54	4.16	0	6.18	0	0	0	LOC105271259	gustatory receptor
TRINITY_DN11328_c0_g2_i1	0	0	0	0	0	0	0	0	0	IR25A	Ionotropic receptor 25a
TRINITY_DN22512_c0_g1_i1	0	0	0	0	0	0	0	0	4	OR4	odorant receptor 4-like
TRINITY_DN16093_c0_g2_i1	0	3	2	0	2	0	0	0	1	OR4	odorant receptor 4-like
TRINITY_DN2421_c0_g1_i2	345.38	232.45	508.7	42.62	32.72	197.81	496.99	200.48	183.08	CSP	chemosensory protein
TRINITY_DN245_c0_g1_i1	0	145.07	121.27	0	0	0	74.94	75.66	0	THK33176.1	chemosensory protein 6
TRINITY_DN24561_c0_g1_i1	0	0	0	0	0	0	0	0	1	OR4	odorant receptor 4-like
TRINITY_DN15202_c0_g2_i1	0	0	0	2	0	6	3	1	0	OR4	odorant receptor 4-like
TRINITY_DN30439_c0_g1_i4	5.17	43.72	20.86	4.05	22.87	52.12	28.42	20.68	7.8	OB56H	General odorant-binding protein 56h
TRINITY_DN245_c0_g1_i2	504.35	904.31	743.85	691.52	412.64	1394.63	795.29	1388.72	296.7	THK33176.1	chemosensory protein 6
TRINITY_DN12903_c0_g1_i2	0	0	6.67	0	0	0	5.66	0	12.53	OR42B	Odorant receptor 42b
cluster_contig12291	25	8	12.89	5	13	19	0	2	11.09	OR42B	Odorant receptor 42b
TRINITY_DN34135_c0_g1_i1	0	0	0	0	0	0	6	0	0	OR42B	Odorant receptor 42b
TRINITY_DN245_c0_g1_i6	58.45	176.18	2.45	37.72	81.35	205.58	73.69	275.13	0	THK33176.1	chemosensory protein 6
TRINITY_DN19510_c0_g1_i1	0	0	1.87	0	0	0	0	0	0	GR28a	Putative gustatory receptor 28a
TRINITY_DN12169_c0_g1_i1	0	0	0	0	0	0	0	0	0	OR42B	Odorant receptor 42b
TRINITY_DN9051_c0_g1_i1	0	0	0	0	0	0	0	0	0	OR42B	Odorant receptor 42b
TRINITY_DN16177_c0_g1_i1	0	0	0	0	0	0	0	0	2	OR69	olfactory receptor 69
TRINITY_DN38734_c0_g1_i1	0	0	0	0	0	0	2	0	0	OR43A	Odorant receptor 43a
cluster_contig14238	0	0	0	0	2	0	0	0	0	OR43A	Odorant receptor 43a
TRINITY_DN3275_c0_g3_i1	0	0	0	0	0	0	0	0	0	OR43a	odorant receptor 43a-like
TRINITY_DN1357_c0_g1_i6	540.91	9990.17	12766.3	17269	6053.54	59466.1	2459.12	19607.8	18196.8	OR43A	Odorant receptor 43a
cluster_contig14958	4	0	0	0	0	3	0	0	0	OR43A	Odorant receptor 43a
TRINITY_DN16358_c0_g1_i1	0	0	0	0	0	2	0	0	0	OR43A	odorant receptor 43a-like
TRINITY_DN1357_c0_g1_i5	1012.95	12878.1	40237.9	17554.7	6261.42	46881.7	3077.99	9547.45	22868.9	OR43A	Odorant receptor 43a
TRINITY_DN14106_c0_g1_i1	0	0	1.54	0	7.71	6.45	0	0	0	OR43A	Odorant receptor 43a
cluster_contig9759	113.34	3404.81	4987.58	2303.91	536.51	3905.95	438.98	2040.43	7957.68	OR43A	Odorant receptor 43a
cluster_contig12467	8.4	225.09	366.56	324.27	71.92	44.07	8.51	152.86	0	OR43A	Odorant receptor 43a
TRINITY_DN2008_c0_g1_i4	0	0	0	0	0	0	0	0	0	OR43A	Odorant receptor 43a
TRINITY_DN23614_c0_g1_i1	0	0	3	0	0	5.54	3	0	10.95	OR43A	Odorant receptor 43a
TRINITY_DN4496_c0_g1_i4	0	0	0	0	0	0	0	0	402.74	GR43A	gustatory receptor for sugar taste 43a-like isoform X2
TRINITY_DN180_c0_g2_i3	0	0	0	0	0	0	0	0	0	OR43A	Odorant receptor 43a
TRINITY_DN10063_c0_g2_i1	2	0	2	0	13	9	1	0	30	OR43A	Odorant receptor 43a
TRINITY_DN2432_c0_g2_i1	145.13	3771.75	3481.89	1527.52	1750.39	3374.7	1192.42	512.57	3065.69	OBP72	General odorant-binding protein 72
TRINITY_DN2456_c0_g1_i2	0	0	0	0	0	0	0	0	0	THK33221.1	chemosensory protein 4
TRINITY_DN23524_c0_g1_i1	0	3	6	0	1	3	6	0	4	OR45A	Odorant receptor 45a
cluster_contig11890	3	2	0	0	1	3	0	0	4	OR45B	Odorant receptor 45b
TRINITY_DN1916_c0_g1_i1	149.97	588.8	673.87	461.14	9.32	6001.78	1881.12	299.25	4296.22	OB69A	General odorant-binding protein 69a
TRINITY_DN10025_c0_g2_i1	0	0	0	0	0	0	0	0	0	OR1FC_HUMAN	Olfactory receptor 1F12
TRINITY_DN25531_c0_g1_i1	5	2	7	0	1	10	0	0	5	OR46a	odorant receptor 46a, isoform A-like isoform X1
TRINITY_DN4260_c0_g1_i4	0	0	0	0	0	0	0	0	0	GR68a	gustatory receptor 68a
TRINITY_DN2522_c0_g1_i4	0	23.63	7.64	0	18.9	36.58	59.62	0.25	35.89	AZQ24958.1	chemosensory protein, partial
TRINITY_DN8030_c0_g1_i2	29.87	21.06	19.59	4.11	11.62	40.97	24	19.29	32.97	OR46a	odorant receptor 46a, isoform A-like
TRINITY_DN36017_c0_g1_i1	1	4	2	0	2.01	12	5	0	0	OR46A	Odorant receptor 46a, isoform A
TRINITY_DN19764_c0_g1_i2	0	1.75	1.01	4.97	0	0	0	0	0	OR46a	odorant receptor 46a, isoform A-like
TRINITY_DN26629_c0_g1_i1	67.5	74.91	145.08	7.65	55.87	158.85	60.13	36.31	84.81	OB56A	General odorant-binding protein 56a
TRINITY_DN5799_c0_g1_i2	12.14	0	2.74	7.19	13.96	0	12.26	0	2.56	OR46A	Odorant receptor 46a, isoform A
TRINITY_DN12608_c0_g1_i2	0	0	0	0	0	2	0	0	0	OR46a	odorant receptor 46a, isoform A-like
TRINITY_DN15945_c0_g1_i1	0	0	0	0	0	0	0	0	0	OR46a	odorant receptor 46a, isoform A-like
cluster_contig13395	43.17	32.99	13.1	0	11.84	2.17	1.48	7.12	4.34	OR46a	odorant receptor 46a, isoform A-like isoform X2
TRINITY_DN6157_c0_g2_i1	0	0	0	1.38	5.29	0	0	0	5.65	OR46a	odorant receptor 46a, isoform A-like
TRINITY_DN6245_c0_g2_i1	0	0	0	0	4	0	0	2	0	GR28b	putative gustatory receptor 28b
TRINITY_DN14160_c1_g2_i3	0	0	0	5	0	0	0	0	0	OR46a	odorant receptor 46a, isoform A-like
TRINITY_DN3853_c0_g3_i1	0	0	0	0	0	2.75	1	0	0	OR46a	odorant receptor 46a, isoform A-like isoform X2
TRINITY_DN5799_c0_g2_i1	0	0	0.07	0	3.75	0	0	1	2.36	OR46A	Odorant receptor 46a, isoform A
TRINITY_DN3681_c0_g2_i5	2.14	0	18.49	0	33.71	41.17	31.7	6.93	20.79	GR43A	gustatory receptor for sugar taste 43a-like isoform X2
cluster_contig4942	36.1	39.97	22.85	16.27	56.27	54.49	45.89	26.62	29.93	OR46a	odorant receptor 46a, isoform A-like
TRINITY_DN2549_c0_g4_i1	7.62	0	99	72.32	0	0	53.39	47.92	0	THK32840.1	chemosensory protein 7
TRINITY_DN3853_c0_g2_i2	0	0	0	10.53	11.37	27.43	8.93	0	0	OR46a	odorant receptor 46a, isoform A-like isoform X2
cluster_contig1346	12.04	0	6	10.13	10.49	1.57	41.64	3.01	12.32	IR25A	Ionotropic receptor 25a
cluster_contig15069	2.86	23.37	25.96	1.46	6.18	7.19	14.27	12	15.39	OR46A	Odorant receptor 46a, isoform A
TRINITY_DN23200_c0_g1_i1	0	0	0	0	0	0	0	0	2	OR46a	odorant receptor 46a, isoform A-like isoform X2
TRINITY_DN4203_c0_g1_i2	1.46	4.54	2.23	0	3.57	12.59	14.64	28.14	13.2	OR46a	odorant receptor 46a, isoform A-like isoform X2
TRINITY_DN23528_c0_g1_i1	518.83	7057.84	3985.13	2537.83	6067.19	7498.83	4151.56	4471.75	10062.9	OB56D	General odorant-binding protein 56d
TRINITY_DN17476_c1_g1_i1	0	0	0	0	0	0	0	0	0	OR46a	odorant receptor 46a, isoform A-like
TRINITY_DN9075_c0_g1_i3	0	0	0	0	0	0	0	0	0	OR46a	odorant receptor 46a, isoform A-like
TRINITY_DN15262_c0_g1_i1	0	0	0	0	0	0	0	0	0	OR46a	odorant receptor 46a, isoform A-like
TRINITY_DN2413_c1_g1_i6	1.12	41.24	7.5	0	19	19.29	0	10.27	94.89	OR46a	odorant receptor 46a, isoform A-like isoform X2
TRINITY_DN30107_c0_g1_i1	103.12	762.29	618.98	0	784.1	370.53	677	450.21	1055.07	OB56A	General odorant-binding protein 56a
TRINITY_DN6942_c1_g1_i1	0	0	0	0	1	0	3	0	1	OR46a	odorant receptor 46a, isoform A-like
TRINITY_DN26033_c0_g1_i1	0	33.42	0	11.05	0	0	0	16.67	11.83	THK33222.1	chemosensory protein 5
TRINITY_DN6157_c0_g1_i1	0	4.88	15.23	0	3.83	16.81	11.48	0	7.03	OR46a	odorant receptor 46a, isoform A-like
TRINITY_DN8012_c0_g1_i1	0	0	0	0	8	5	0	0	0	OR46a	odorant receptor 46a, isoform B-like
TRINITY_DN24581_c0_g1_i1	0	0	0	0	0	1	0	0	1	OR47a	odorant receptor 47a-like isoform X1
TRINITY_DN19436_c0_g3_i1	0	0	0	0	0	3	0	0	0	OR47a	odorant receptor 47a-like isoform X1
TRINITY_DN2205_c0_g3_i4	0	0	12.11	0	1.07	0	0	0	0	OR47A	Odorant receptor 47a
TRINITY_DN2610_c0_g1_i2	205.92	93.35	227.59	215.22	117.04	31.62	0	41.92	30.33	CSP	chemosensory protein
TRINITY_DN10324_c0_g2_i1	0	0	0	0	0	2	0	0	0	OB56A	General odorant-binding protein 56a
cluster_contig25	0	0	14.12	2.42	0	0	0	29.39	13.06	OR47A	Odorant receptor 47a
TRINITY_DN7638_c0_g3_i1	0	0	0	0	4.94	2.81	5.44	0	10.61	OR47a	odorant receptor 47a-like isoform X2
TRINITY_DN11316_c0_g1_i1	0.45	0	4.5	2	5.78	0	0	0	0	OR47a	odorant receptor 47a-like isoform X2
TRINITY_DN2849_c0_g1_i2	0	382.98	319.58	100.09	414.25	82.69	415.92	661.97	183.5	THK33131.1	chemosensory protein 1
TRINITY_DN10576_c0_g3_i1	7.78	5	3.74	0	0	24.57	1.72	19.07	4.24	OR47a	odorant receptor 47a-like isoform X2
TRINITY_DN3643_c0_g1_i2	0	0	0	0	9.66	11.69	0	0	0	OR47a	odorant receptor 47a-like isoform X2
TRINITY_DN4298_c0_g5_i1	0	0	0	0	0	0	0	0	0	OR47a	odorant receptor 47a-like isoform X2
TRINITY_DN6846_c0_g1_i2	0	0	0	0	0	0	0	0	0	OR47a	odorant receptor 47a-like isoform X2
TRINITY_DN8540_c0_g1_i1	0	0	0	0	0	0	0	0	2	OR47a	odorant receptor 47a-like isoform X2
cluster_contig10459	0	0	2	1	13.27	0	3	1	1.15	OR47a	odorant receptor 47a-like isoform X2
TRINITY_DN6618_c0_g1_i2	11.37	0	13	0	0	0	0	0	0	OR47a	odorant receptor 47a-like isoform X2
TRINITY_DN4298_c0_g1_i1	0	0	0	0	0	0	2	0	0	OR47a	odorant receptor 47a-like isoform X2
cluster_contig12083	0	0	0	0	1	3	0	1	2	OR47a	odorant receptor 47a-like isoform X1
cluster_contig10331	1.06	0	4.41	0	1.21	0	2.19	0	0	OR47a	odorant receptor 47a-like isoform X1
TRINITY_DN1349_c1_g1_i3	10.01	4.71	4.97	0	2.12	0	8.23	0	16.72	OR47a	odorant receptor 47a-like isoform X2
cluster_contig2727	4	0	1	3	7	6	1	0	1	OR47a	odorant receptor 47a-like isoform X1
TRINITY_DN2874_c0_g1_i4	20.43	0	0	0	0	0	61.29	0	0	AZQ24958.1	chemosensory protein, partial
TRINITY_DN4298_c0_g3_i3	0	0	0	0	0	0	0	0	0	OR47a	odorant receptor 47a-like isoform X2
cluster_contig12082	6	12	1	0	7	5	8	3	3	OR47a	odorant receptor 47a-like isoform X1
TRINITY_DN1349_c1_g1_i2	0	0	0	0	0	0	0	0	0	OR47a	odorant receptor 47a-like isoform X2
TRINITY_DN5503_c0_g1_i2	0	5.29	0	13.04	0	9.23	3.47	0	2.22	OR47a	odorant receptor 47a-like isoform X2
TRINITY_DN9764_c0_g1_i1	0	0	1	2	7	7	0	1	10	OR47a	odorant receptor 47a-like isoform X1
TRINITY_DN5627_c0_g1_i2	0	0	0	0	5	0	0	0	0	OR47a	odorant receptor 47a-like isoform X2
TRINITY_DN10163_c0_g1_i4	3	3	0	0	0	6	4	0	0.6	OR47a	odorant receptor 47a-like isoform X1
TRINITY_DN19169_c0_g3_i1	0	0	0	0	0	0	0	0	0	OR1FC_HUMAN	Olfactory receptor 1F12
TRINITY_DN4611_c0_g1_i4	8.4	24	14.75	25.41	30	18.74	10.82	14.93	10.47	OR47a	odorant receptor 47a-like isoform X2
TRINITY_DN6846_c0_g1_i1	0	0	0	0	0	0	2	0	0	OR47a	odorant receptor 47a-like isoform X2
TRINITY_DN4298_c0_g3_i2	0	0	0	0	0	0	0	0	0	OR47a	odorant receptor 47a-like isoform X2
TRINITY_DN10180_c0_g1_i1	0	0	0	0	0	0	0	0	2	OR47a	odorant receptor 47a-like isoform X2
TRINITY_DN5503_c0_g1_i4	0	0	0	1.69	2.32	0	12.83	4.91	0	OR47a	odorant receptor 47a-like isoform X2
TRINITY_DN22002_c0_g1_i1	0	0	0	0	0	2	0	0	0	OR47a	odorant receptor 47a-like isoform X2
TRINITY_DN6846_c2_g2_i1	0	0	0	0	0	0	5	0	0	OR47a	odorant receptor 47a-like isoform X2
TRINITY_DN17185_c0_g1_i1	0	0	2	0	2	7	0	2	3	OR47A	Odorant receptor 47a
TRINITY_DN4648_c0_g1_i2	0	0	5	0	3	2	4	4	6	OR47A	Odorant receptor 47a
TRINITY_DN11263_c0_g2_i1	0	0	0	0	1	0	0	0	0	OR47a	odorant receptor 47a-like isoform X1
TRINITY_DN26930_c0_g1_i1	0	0	2	0	1	0	2	4	0	OR47a	odorant receptor 47a-like isoform X1
TRINITY_DN5503_c0_g1_i5	0	0	0	0	0	0	0	0	0	OR47a	odorant receptor 47a-like isoform X2
cluster_contig6313	3	19	5	4	11	5	6	1	8	OR47a	odorant receptor 47a-like isoform X1
TRINITY_DN7638_c0_g1_i3	1.37	1.76	0	3.28	13.3	1.94	16.27	1.42	5.1	OR47a	odorant receptor 47a-like isoform X2
cluster_contig4520	16.86	202.25	232.06	168.84	92.39	342.77	97.96	101.91	365.2	OB56D	General odorant-binding protein 56d
TRINITY_DN9113_c0_g1_i2	3	0	2	0	3	17	0	4	0	OR47A	Odorant receptor 47a
TRINITY_DN6846_c0_g2_i1	0	0	0	0	0	0	2.01	0	0	OR47a	odorant receptor 47a-like isoform X2
TRINITY_DN22_c0_g2_i1	8.01	3.77	62.03	17.97	45.98	108.54	20.33	48.94	52.64	OB56D	General odorant-binding protein 56d
TRINITY_DN19436_c0_g3_i4	0	0	0	0	0	3.88	0	0	2	OR47a	odorant receptor 47a-like isoform X2
cluster_contig10850	0	0	0	0	0	0	0	0	0	OR1FC_HUMAN	Olfactory receptor 1F12
TRINITY_DN13259_c0_g1_i1	0	0	0	0	0	0	0	0	0	GR28b	putative gustatory receptor 28b
TRINITY_DN39929_c0_g1_i1	0	0	0	0	0	0	3	0	0	GR28b	putative gustatory receptor 28b isoform X1
TRINITY_DN3176_c0_g2_i1	20.56	1.34	0	0	0	0.13	0	14.68	2.65	OR47a	odorant receptor 47a-like isoform X2
cluster_contig7043	17.64	36.99	0	2.25	13.98	0	0	6.45	3.83	OR47A	Odorant receptor 47a
TRINITY_DN13350_c1_g1_i1	0	0	0	0	0	0	0	0	0	OR47a	odorant receptor 47a-like isoform X2
TRINITY_DN10163_c0_g1_i3	0	13.51	2.61	0	0	0	0	0	3.67	OR47a	odorant receptor 47a-like isoform X2
cluster_contig4103	0	11.67	9	0	0	0	0	0	0	OR47b	odorant receptor 47b-like
TRINITY_DN29761_c0_g1_i1	0	0	0	0	0	0	2.01	0	0	OR49a	odorant receptor 49a-like isoform X1
TRINITY_DN26751_c0_g1_i1	0	0	0	0	0	0	0	0	2.98	OR49A	odorant receptor 49a-like
TRINITY_DN26020_c0_g1_i1	1	3	0	0	0	0	0	0	4.95	OR49A	odorant receptor 49a-like
TRINITY_DN4397_c0_g2_i1	0	18.79	6.59	0	16.66	40.96	0	2.42	11.35	OR49B	Odorant receptor 49b
TRINITY_DN13984_c0_g1_i1	0	0	0	0.99	0	0	0	1.87	0	OR49b	odorant receptor 49b-like
cluster_contig13107	0	0	4	0	3	17	0	0	1.05	OR49b	odorant receptor 49b-like
TRINITY_DN16396_c0_g1_i1	6	0	1	0	4	0	0	0	15	OR49b	odorant receptor 49b-like
cluster_contig1766	17.14	0	1.68	0	6.67	19.04	10.9	1.58	14.8	OR49b	odorant receptor 49b-like
cluster_contig1413	0	0	0	21	16.35	0	0	4.43	2.89	OR49B	Odorant receptor 49b
cluster_contig12563	7	6	8	3	13	7	5	4	12	OR49B	Odorant receptor 49b
TRINITY_DN22866_c0_g1_i2	0	8.62	9.14	0	7.48	0	0	15.21	0	OR49B	Odorant receptor 49b
TRINITY_DN14346_c0_g2_i1	0	0	0	0	0	0	0	2	0	OR49b	odorant receptor 49b-like
cluster_contig13030	26.64	14	7	0	0	0	0	0.98	0	GR28B	Putative gustatory receptor 28b
TRINITY_DN7202_c0_g1_i1	0	13.21	0	2.67	0	0	22.83	0	12.16	OR49B	Odorant receptor 49b
TRINITY_DN37958_c0_g1_i1	0	0	0	0	4.54	0	14.33	3.08	0	OR49B	Odorant receptor 49b
TRINITY_DN3638_c0_g1_i1	4.86	3.25	4.73	0	15.68	22.44	0	0	18.91	OBP72	General odorant-binding protein 72
TRINITY_DN16407_c0_g1_i1	0	0	0	0	0	0	6.95	0	2.38	OR49B	Odorant receptor 49b
TRINITY_DN2874_c0_g1_i6	0	0	0	0	0	0	0	0	0	AZQ24958.1	chemosensory protein, partial
TRINITY_DN22248_c0_g1_i1	0	1	5	0	0	0	0	0	9	OR49b	odorant receptor 49b-like
TRINITY_DN5046_c0_g1_i1	0	0	0	0	0	0	0	0	0	OR49B	Odorant receptor 49b
TRINITY_DN12350_c0_g1_i1	21	32	20	3.01	20	31	22.05	7.13	38.62	OR49B	Odorant receptor 49b
TRINITY_DN27627_c0_g1_i2	0	0	0	0	0	0	0	0	0	OR49b	odorant receptor 49b-like
TRINITY_DN22645_c0_g1_i1	5.38	0	0	0	0	0	0	0	5.69	OR49b	odorant receptor 49b-like
TRINITY_DN2842_c0_g3_i1	0	49.52	92.37	69.52	51.21	107.76	167.69	178.66	45.25	OB56D	General odorant-binding protein 56d
TRINITY_DN10441_c0_g1_i2	1	4.97	0	1	0	16	0	3.74	3.9	OR49B	Odorant receptor 49b
TRINITY_DN5638_c0_g1_i2	0	0	0	0	2	0	0	0	2.1	OR49B	Odorant receptor 49b
TRINITY_DN25645_c0_g1_i1	0	0	0	0	0	0	0	0	3	OR49b	odorant receptor 49b-like
TRINITY_DN5046_c0_g1_i2	60.86	0	14.72	2.33	5.67	0	9.27	0	36.69	OR49B	Odorant receptor 49b
TRINITY_DN10629_c0_g2_i1	4	0	0	0	1	0	0	0	2	OR49B	Odorant receptor 49b
TRINITY_DN5638_c0_g2_i1	1	10.41	12.86	0	5.98	7	5.67	8.96	17	OR49B	Odorant receptor 49b
TRINITY_DN12903_c0_g1_i1	0	0	0	0	0	0	0	0	0	OR59B	Odorant receptor 59b
TRINITY_DN12031_c0_g1_i2	3.01	0	0	0	2	0	0	0	0	OR59C	Putative odorant receptor 59c
TRINITY_DN45939_c0_g1_i1	0	0	0	0	0	0	0	0	0	OR5a	odorant receptor 5a (or5a gene)
TRINITY_DN7844_c0_g1_i2	0	0	14.13	0	0	3.97	20	19	34	OR63A	Odorant receptor 63a
TRINITY_DN23581_c0_g2_i1	0	0	0	0	1	2	0	0	1	OR67a	odorant receptor 67a-like
TRINITY_DN14603_c0_g1_i1	0	0	0	0	0	0	0	0	0	OR67a	odorant receptor 67a-like
TRINITY_DN11656_c0_g2_i1	1	0	0	0	1	0	0	0	7	OR67a	odorant receptor 67a-like
cluster_contig5589	5	3	0	1	0	0	0	0	0	OR67A	Odorant receptor 67a
TRINITY_DN36507_c0_g1_i1	0	0	0	0	0	0	2	0	0	OR67a	odorant receptor 67a-like
TRINITY_DN12289_c0_g1_i1	0	0	0	0	0	0	0	0	0	GR28b	putative gustatory receptor 28b isoform X1
TRINITY_DN2888_c0_g1_i2	83.18	30.62	135.79	0	143.81	304.17	200.66	146.58	122.08	CSP	chemosensory protein
TRINITY_DN9150_c0_g1_i3	12	1	0	2	0	0	0	0	0	OR67a	odorant receptor 67a-like
cluster_contig11091	3	2	0	0	0	1	0	1	0	IR93A	Ionotropic receptor 93a
TRINITY_DN11656_c0_g1_i1	0	0	0	0	1	0	0	0	5	OR67A	Odorant receptor 67a
TRINITY_DN7428_c0_g3_i1	0	0	0	0	2	0	6	1	0	OR67A	Odorant receptor 67a
TRINITY_DN7428_c0_g2_i1	0	0	0	0	0	0	1	0	0	OR67A	Odorant receptor 67a
TRINITY_DN3275_c0_g5_i1	0	0	0	0	0	0	0	0	0	OR67a	odorant receptor 67a-like
TRINITY_DN13198_c0_g1_i4	0	2.25	0	0	0	1.02	0	0	0	OR67B	Odorant receptor 67b
cluster_contig12228	4.54	21.73	27.49	15.77	19.46	23.64	28.63	3.1	12.23	OR67B	Odorant receptor 67b
TRINITY_DN27083_c0_g1_i1	0	0	0	1	1	0	0	0	1	OB83A	General odorant-binding protein 83a
TRINITY_DN2346_c0_g1_i4	0	0	4.83	0	2.06	0	0	8.58	0	OR67B	Odorant receptor 67b
TRINITY_DN3272_c0_g1_i1	611.67	625.14	1651.47	518.48	834.1	914.27	390.91	583.83	1065.15	THK33131.1	chemosensory protein 1
TRINITY_DN29862_c0_g1_i1	6.68	0	6.56	0.28	0	5.32	5.23	0.78	0	OR67B	Odorant receptor 67b
TRINITY_DN11605_c0_g1_i2	0	2.01	2	3.7	4.97	5.66	0	0	13.5	OR67B	Odorant receptor 67b
TRINITY_DN3272_c0_g1_i2	236.11	202.8	327.08	26.11	0	0	13.71	337.98	279.61	THK33131.1	chemosensory protein 1
cluster_contig11064	2.41	0	4.63	0	7.64	4.46	0	1.16	8.21	OR67B	Odorant receptor 67b
TRINITY_DN4543_c0_g2_i1	0	0	0	0	0	0	0	0	0	OR67c	odorant receptor 67c-like
TRINITY_DN4543_c0_g3_i1	0	0	0	3	0	0	0	1	0	OR67c	odorant receptor 67c-like
TRINITY_DN15833_c0_g1_i1	0	0	0	0	0	0	0	0	0	OR67c	odorant receptor 67c-like
TRINITY_DN11099_c0_g2_i1	0	0	0	0	0	4.34	0	0	0	OR67c	odorant receptor 67c-like
TRINITY_DN36009_c0_g1_i1	0	20.34	19	0	0	54.43	48.98	0	0	THK33134.1	chemosensory protein 8
TRINITY_DN14961_c0_g2_i1	0	0	0	0	0	0	1	0	0	OR67c	odorant receptor 67c-like
cluster_contig4670	115.5	48046.7	13215.1	47096	25842.4	10934.4	158302	82812.2	8571.4	OB56H	General odorant-binding protein 56h
TRINITY_DN28258_c0_g2_i1	0	0	0	0	0	4	0	0	0	GR28B	Putative gustatory receptor 28b
TRINITY_DN1402_c0_g1_i5	0	0	0	0	7	0	0	0	2	OB83A	General odorant-binding protein 83a
TRINITY_DN3681_c0_g2_i3	0	0	0	0	0	1.88	0	0	0	GR43A	Gustatory receptor for sugar taste 43a
TRINITY_DN5160_c0_g1_i2	0	0	0	0	0	0	0	0	4.36	OR67C	Odorant receptor 67c
TRINITY_DN4338_c0_g1_i4	0	221.7	48.96	0	178.11	53.56	40.48	37.82	113.73	GR107	Gr107; gustatory receptor Gr107
TRINITY_DN16667_c0_g1_i2	0	0	0	0	1	2	0	0	0	OR67C	Odorant receptor 67c
TRINITY_DN13765_c0_g1_i2	0	1	0	1	4	3	0	4	2	OR67c	odorant receptor 67c-like
TRINITY_DN29880_c0_g1_i1	0	0	0	0	0	0	4	0	0	OR67c	odorant receptor 67c-like
TRINITY_DN23244_c0_g2_i1	0	0	0	0	0	0	0	0	0	GR02A	Putative gustatory receptor 2a
cluster_contig11007	0	12	0	0	0	3	0	0	0	OR67c	odorant receptor 67c-like
TRINITY_DN4828_c0_g1_i3	0	0	1.96	0	10.74	0	0	0	0.3	OR67C	Odorant receptor 67c
TRINITY_DN18587_c0_g1_i1	0	0	4	0	2	5	0	2	3	OR67c	odorant receptor 67c-like
TRINITY_DN7137_c0_g3_i1	0	0	0	2	0	0	0	4	0	OR67c	odorant receptor 67c-like
TRINITY_DN33665_c0_g1_i1	0	0	0	0	0	0	2	0	0	OR67c	odorant receptor 67c-like
TRINITY_DN3880_c0_g1_i1	250.67	0	0	113.22	289.78	147.87	322.81	9.77	238.41	AZQ24958.1	chemosensory protein, partial
TRINITY_DN17498_c0_g1_i1	21	90	55.55	0	60.99	52.22	0	114.38	90	OB56D	General odorant-binding protein 56d
TRINITY_DN3880_c0_g1_i2	299.71	57.26	91.32	182.49	160.83	267.83	265.04	129.26	285.33	AZQ24958.1	chemosensory protein, partial
TRINITY_DN4091_c0_g1_i2	99.85	655.71	488.8	191.81	327.21	397.38	449.22	493.84	315.85	AZQ24958.1	chemosensory protein, partial
TRINITY_DN5733_c0_g1_i2	0	0	0	0	1	0	0	0	0	OR67c	odorant receptor 67c-like isoform X3
cluster_contig7443	0	0	0	4.5	8.5	0	8.75	0	1.94	OR67C	Odorant receptor 67c
TRINITY_DN20119_c0_g1_i1	0	0	0	0	0	0	0	0	2	OR67c	odorant receptor 67c-like
TRINITY_DN6017_c0_g1_i3	0	10	0	0	1	0	0	0	3	OR67C	Odorant receptor 67c
TRINITY_DN11099_c0_g3_i1	0	0	0	0	0	0	0	1	2	OR67c	odorant receptor 67c-like
TRINITY_DN5160_c0_g1_i1	7	5	10	3	12	10	1	7	21.64	OR67C	Odorant receptor 67c
TRINITY_DN13752_c0_g1_i1	0	0	2	0	1	0	0	2	3	OR67c	odorant receptor 67c-like
TRINITY_DN15687_c0_g1_i1	0	0	0	0	0	0	0	0	0	OR67c	odorant receptor 67c-like
TRINITY_DN411_c0_g1_i1	985.28	561.2	1151.41	335.01	116.37	1485.63	1944.86	877.44	1257.6	AZQ24964.1	chemosensory protein, partial
TRINITY_DN11099_c0_g1_i1	0	0	0	0	0	0	0	0	0	OR67c	odorant receptor 67c-like
TRINITY_DN4828_c0_g1_i1	5.55	5.76	0	0	0	0	8.28	0	20.21	OR67C	Odorant receptor 67c
cluster_contig11704	5	0	0	0	4.59	4	0	0	1.21	OR67c	odorant receptor 67c-like
cluster_contig14854	0	7	2	0	6	4	3	0	1	OR67c	odorant receptor 67c-like
TRINITY_DN3289_c0_g1_i1	12.41	20.08	0	0	4.94	0	2.96	16.87	10.76	OR67C	Odorant receptor 67c
TRINITY_DN27155_c0_g1_i1	0	5	2	0	6	17.66	7	0	9	OR67c	odorant receptor 67c-like
TRINITY_DN20794_c0_g1_i1	0	0	0	1	2.41	0	2	0	6.79	OR67c	odorant receptor 67c-like
TRINITY_DN2586_c0_g1_i4	0	6.65	0	0	5.77	1.16	0	0	9.28	OR67C	Odorant receptor 67c
TRINITY_DN12705_c0_g2_i1	0	0	0	0	0	0	0	0	0	OR67c	odorant receptor 67c-like
TRINITY_DN3748_c0_g1_i4	11.92	4.7	20.9	2.3	13.77	47.61	0	4.42	12.96	OR67C	Odorant receptor 67c
TRINITY_DN5473_c0_g1_i3	27.44	10.31	7.51	14.14	5.96	76.93	9.19	36.69	2.17	OR71A	Putative odorant receptor 71a
cluster_contig12730	68.5	153	115.25	90.02	159.31	162.21	158.34	195.1	241.31	OR71A	Putative odorant receptor 71a
TRINITY_DN21683_c1_g1_i1	0	0	0	0	2	0	0	0	0	OR1FC_HUMAN	Olfactory receptor 1F12
TRINITY_DN1007_c0_g1_i4	39.56	64.71	87.72	81.57	52.79	100.98	37.83	18.01	44.84	OR71A	Putative odorant receptor 71a
TRINITY_DN15316_c0_g1_i1	0	5	2	2	11	14	10	19	0	GR02A	Putative gustatory receptor 2a
cluster_contig10882	59.03	16.76	7.27	0	19.04	111.21	27.88	13.26	30.39	OR71A	Putative odorant receptor 71a
TRINITY_DN22187_c0_g1_i1	3	3	0	0	1	3	0	1	9	OR71a	putative odorant receptor 71a
cluster_contig12729	0	18.52	4.75	9.14	5	16.08	9.87	8.3	0	OR71A	Putative odorant receptor 71a
TRINITY_DN2008_c2_g1_i1	0	0	0	0	0	0	3	0	0	OR7A	odorant receptor 7a-like (LOC105270852), transcript variant X2, mRNA
TRINITY_DN2824_c0_g1_i1	0	0	0	0	0	0	0	0	6.02	OR7A	Odorant receptor 7a
TRINITY_DN18403_c0_g1_i2	0	0	0	0	6	0	0	0	0	OR7a	odorant receptor 7a-like isoform X2
TRINITY_DN4386_c0_g3_i1	10	1	4.47	0	5	0	2	0	1.24	OR7A	Odorant receptor 7a
TRINITY_DN13636_c0_g1_i2	0	4	0	0	1	0	1	0	1	OR7a	odorant receptor 7a-like isoform X2
TRINITY_DN38952_c0_g1_i1	0	3	2	0	0	6	3	0	0	OR7a	odorant receptor 7a-like isoform X2
TRINITY_DN411_c0_g1_i2	577.19	506.58	542.32	51.23	388.62	427.84	1332.67	413.75	720.84	AZQ24964.1	chemosensory protein, partial
TRINITY_DN9133_c0_g1_i1	0	0	0	0	1	0	0	3	0	OR7a	odorant receptor 7a-like isoform X2
TRINITY_DN5025_c0_g2_i1	0	0	0	0	0	0	0	0	0	OR7a	odorant receptor 7a-like isoform X2
TRINITY_DN2824_c0_g1_i7	0	0	1.83	3	0	7.37	9	0	11.3	OR7A	Odorant receptor 7a
TRINITY_DN4252_c0_g2_i3	0	0	0	0	14.85	0	4.05	1	7.19	OR7A	Odorant receptor 7a
TRINITY_DN7227_c0_g2_i1	0	14.02	11.12	8.66	25.85	18.22	23.05	19.6	22.13	OB56D	General odorant-binding protein 56d
TRINITY_DN37709_c0_g1_i1	0	0	0	0	0	0	0	0	0	OR7a	odorant receptor 7a-like isoform X2
TRINITY_DN4258_c0_g1_i1	4478	4186	4952	2057	5970	6188	6593	5279	6058	AZQ24964.1	chemosensory protein, partial
TRINITY_DN5025_c0_g1_i1	0	0	0	0	0	0	0	0	0	OR7a	odorant receptor 7a-like isoform X2
TRINITY_DN7126_c0_g1_i2	0	0	0	0	1	0	0	0	0	OR7a	odorant receptor 7a-like isoform X2
cluster_contig12911	0	0	4	0	0	0	0	0	0	OR81	odorant receptor 81
TRINITY_DN32389_c0_g1_i1	0	0	7	0	3	3	7	0	0	OR82	odorant receptor 82
TRINITY_DN5617_c0_g2_i1	1.75	0	0	0	0	0	0	0	0	OR82a	odorant receptor 82a-like
TRINITY_DN4821_c0_g1_i2	0	0	0	28.68	711.17	65.63	0	0	6.92	THK33222.1	chemosensory protein 5
TRINITY_DN15111_c0_g1_i2	0	0	0	0	0	0	0	0	0	OR82a	odorant receptor 82a-like
TRINITY_DN5420_c0_g1_i3	0	0	0	0	4	0	0	0	0	OR82A	Odorant receptor 82a
TRINITY_DN2519_c1_g2_i1	0	0	0	1	0	2	0	0	1	OR82a	odorant receptor 82a-like (LOC107044779), mRNA
TRINITY_DN14629_c0_g2_i1	0	0	0	0	0	9	0	1	0	OR82a	odorant receptor 82a-like
TRINITY_DN2346_c0_g1_i7	0	0	3.61	0	0	2	0	0	0	OR82a	odorant receptor 82a-like
TRINITY_DN21492_c0_g2_i1	1	0	0	0	0	0	0	0	0	GR02A	Putative gustatory receptor 2a
TRINITY_DN11605_c0_g1_i3	0	0	0	0.35	1	0	0	0	4.17	OR82a	odorant receptor 82a-like (LOC107044779), mRNA
TRINITY_DN27848_c0_g1_i1	2	10	6.08	8.44	8.49	32.54	22	7.92	0	GR02A	Putative gustatory receptor 2a
cluster_contig8626	5	51.41	5.1	20.35	23.64	53	45.45	26.96	10.81	OR82a	odorant receptor 82a-like
TRINITY_DN9488_c0_g1_i1	0	0	0	0	0	0	0	0	2	OR82a	odorant receptor 82a-like
TRINITY_DN9105_c0_g1_i1	0	0	0	0	0	0	0	1	0	OR82a	odorant receptor 82a-like
TRINITY_DN30533_c0_g1_i1	0	0	0	0	0	0	2	0	0	OR82a	odorant receptor 82a-like
TRINITY_DN1046_c0_g2_i4	0	0	0	0	4	12	0	0	2	OR82a	odorant receptor 82a-like
cluster_contig2736	3	5	2	8	21	26	14	5	15	OR82a	odorant receptor 82a-like (LOC107044779), mRNA
TRINITY_DN3331_c0_g1_i3	0	1	4.39	0	3	5	0	8.8	1	OR82a	odorant receptor 82a-like
TRINITY_DN6653_c0_g1_i2	0	0	0	21.29	0	0	0	0	7.39	OR82a	odorant receptor 82a-like
TRINITY_DN35308_c0_g1_i1	0	0	0	0	0	0	2	0	0	OR82a	odorant receptor 82a-like
TRINITY_DN16163_c0_g1_i1	0	0	0	0	0	0	0	0	3	OR82a	odorant receptor 82a-like (LOC107044779), mRNA
TRINITY_DN2869_c0_g1_i5	0	35.08	34.92	18.12	58.47	0	47.36	48.47	12.08	OR82a	odorant receptor 82a-like
TRINITY_DN2869_c0_g1_i3	0	0	1.46	0	0	0	5.64	0	0	OR82a	odorant receptor 82a-like
cluster_contig8627	15.79	25.02	29.46	1.83	14.15	1.62	8.78	22.42	2.58	OR82a	odorant receptor 82a-like
TRINITY_DN36523_c0_g1_i1	0	0	2	0	3	4	9	0	1	OR82A	Odorant receptor 82a
TRINITY_DN5420_c0_g1_i2	7	4	3	11.31	8	0	7	0	3	OR82A	Odorant receptor 82a
TRINITY_DN4829_c0_g1_i3	0	0	0	0	12.03	0	0	0	23.86	THK32840.1	chemosensory protein 7
TRINITY_DN39923_c0_g1_i1	0	0	0	0	0	0	3	0	0	OR82a	odorant receptor 82a-like
TRINITY_DN6984_c1_g1_i1	0	0	0	0	0	0	0	0	2	OR82a	odorant receptor 82a-like
TRINITY_DN26386_c0_g1_i1	0	0	0	3.56	3.39	0	2.13	0	24	OB56H	General odorant-binding protein 56h
TRINITY_DN19135_c0_g1_i1	0	0	0	0	0	0	0	3	0	OR82a	odorant receptor 82a-like
TRINITY_DN11499_c0_g1_i1	0	0	0	0	1	0	5.66	3	0	OR82a	odorant receptor 82a-like (LOC107044779), mRNA
TRINITY_DN27789_c0_g1_i1	0	0	0	0	0	0	3	0	0	OR82a	odorant receptor 82a-like (LOC107039122), mRNA
TRINITY_DN2205_c0_g3_i3	0	26.83	0	0	18.26	0	0	0	0	OR82a	odorant receptor 82a-like
TRINITY_DN38663_c0_g1_i1	0	0	0	0	0	2	3	0	0	OR82a	odorant receptor 82a-like
TRINITY_DN16852_c0_g1_i1	0	0	0	0	0	0	0	0	0	OR82a	odorant receptor 82a-like
TRINITY_DN13744_c0_g1_i1	0	0	0	0	0	0	5	0	0	OR82a	odorant receptor 82a-like
TRINITY_DN36761_c0_g1_i1	0	0	0	0	0	0	2	0	0	OR82a	odorant receptor 82a-like
TRINITY_DN5388_c0_g1_i2	0	0	0	0	2	0	0	0	0	OR82a	odorant receptor 82a-like
TRINITY_DN27447_c0_g1_i1	0	0	0	0	0	0	0	0	5	OR82a	odorant receptor 82a-like
TRINITY_DN23745_c0_g1_i1	0	0	0	0	0	0	0	0	2	GR66a	gustatory receptor for bitter taste 66a-like
TRINITY_DN8133_c0_g1_i2	1	0	0	2	3.62	5.63	0	0	1	OR82a	odorant receptor 82a-like
TRINITY_DN2525_c0_g1_i3	0	0	0	0	3	4.16	0	0	1	OR82a	odorant receptor 82a-like
cluster_contig8086	0	7	4	7	22	13	8	5	5.58	OR82a	odorant receptor 82a-like
TRINITY_DN20461_c0_g1_i2	0	0	0	0	1	0	0	0	0	OR82a	odorant receptor 82a-like
TRINITY_DN20258_c0_g1_i1	0	0	0	0	0	0	0	0	0	OR82a	odorant receptor 82a-like
cluster_contig4210	0	0	0	0	16.93	0	0	0	0	OR82a	odorant receptor 82a-like
TRINITY_DN1046_c0_g1_i3	0	0	0	0	1.29	4.68	0	0	0	OR82a	odorant receptor 82a-like
TRINITY_DN15033_c0_g1_i1	0	0	0	0	0	0	0	0	1.93	GR28b	putative gustatory receptor 28b
TRINITY_DN511_c0_g1_i4	279.99	137.24	217.44	194.41	524.15	430.91	331.05	317.37	80.55	AZQ24964.1	chemosensory protein, partial
TRINITY_DN511_c0_g1_i6	59.58	58.06	13.06	10.34	134.08	90.64	0	240.49	52.85	AZQ24964.1	chemosensory protein, partial
cluster_contig6555	15.34	0	59.78	0	0	0	105.98	0	32.91	GR43a	gustatory receptor for sugar taste 43a-like (LOC107042314)
TRINITY_DN2519_c1_g1_i4	0	0	0	0	0	0	0	0	0	OR82a	odorant receptor 82a-like
cluster_contig3544	10.62	6.44	6.15	12.13	6.07	8.43	0	4.81	0	OR82a	odorant receptor 82a-like
TRINITY_DN6805_c0_g1_i1	0	0	0	0	0	0	0	0	0	GR28b	putative gustatory receptor 28b isoform X1
TRINITY_DN2519_c1_g1_i8	0	2.2	0	0	0	2.4	0	0	0	OR82a	odorant receptor 82a-like
TRINITY_DN29379_c0_g1_i1	1.27	0	0	0	0	2	0	0	0	OR82a	odorant receptor 82a-like
TRINITY_DN35536_c0_g1_i1	0	0	0	0	0	0	2	0	0	OR82a	odorant receptor 82a-like
TRINITY_DN4203_c1_g1_i7	0	0	0	0	0	1.15	9.65	0	0	OR82a	odorant receptor 82a-like
TRINITY_DN14629_c0_g1_i1	0	0	0	0	1	2	0	0	0	OR82a	odorant receptor 82a-like
TRINITY_DN11569_c0_g1_i1	0	0	0	0	0	0	0	0	0	OR82a	odorant receptor 82a-like
TRINITY_DN7530_c0_g1_i2	0	0	0	0	0	0	7	0	0	OR82a	odorant receptor 82a-like
cluster_contig6435	0	126	113.11	37.69	68.05	72.18	9.41	9.47	99.94	OBP72	General odorant-binding protein 72
cluster_contig10023	9	0	0	0	0	0	0	0	3	GR02A	Putative gustatory receptor 2a
TRINITY_DN15506_c0_g1_i1	0	0	0	0	0	0	0	0	0	OR82a	odorant receptor 82a-like
TRINITY_DN14552_c0_g2_i1	0	4	0	0	2.38	1.37	0	2	1	OR82a	odorant receptor 82a-like
TRINITY_DN2869_c0_g1_i1	25.35	9.1	19.38	0	0	0	0	12.12	0	OR82a	odorant receptor 82a-like
TRINITY_DN17193_c0_g1_i2	3.98	0	0	0	0	0	0	0	0	OR82a	odorant receptor 82a-like
TRINITY_DN5130_c0_g1_i1	0	0	0	0	0	0	0	0	2	IR68a	putative chemosensory ionotropic receptor IR68a
TRINITY_DN2842_c0_g2_i1	0	0	59.45	29.67	0	0	142.94	0	0	OB56D	General odorant-binding protein 56d
cluster_contig8087	2	0	1	0	0	0	0	0	0	OR82a	odorant receptor 82a-like
TRINITY_DN4424_c0_g1_i4	8.3	0	0	0	0	0	44.23	0	3.06	OR82a	odorant receptor 82a-like
cluster_contig3545	3.19	0	0	0	0	17.85	18.77	0	0	OR82a	odorant receptor 82a-like
TRINITY_DN10074_c0_g1_i1	31.52	0	0	14.92	0.01	59.74	0	1.57	36.58	OR82a	odorant receptor 82a-like
TRINITY_DN7740_c0_g1_i1	0	0	0	0	0	0	0	0	0	OR82a	odorant receptor 82a-like
TRINITY_DN26043_c0_g1_i2	2.33	0	0	0	0	11.18	0	0	0	OR82a	odorant receptor 82a-like
TRINITY_DN25403_c0_g1_i1	0	0	0	0	1	0	0	0	8	GR28b	putative gustatory receptor 28b
TRINITY_DN2525_c0_g1_i4	10.65	1.21	16.33	10.87	0	13.48	6.83	2.17	0	OR82a	odorant receptor 82a-like
cluster_contig3718	5.77	1.07	1	0	2.88	6	7.46	0	0	OR85b	odorant receptor 85b
TRINITY_DN16199_c0_g1_i1	0	0	0	0	3	0	0	0	0	OB69A	General odorant-binding protein 69a
TRINITY_DN16289_c0_g1_i1	0	0	2	0	0	7	0	0	9	OR85b	odorant receptor 85b-like
TRINITY_DN23106_c0_g1_i1	0	0	0	0	0	0	0	0	2	OR85b	odorant receptor 85b
TRINITY_DN13099_c0_g1_i2	3	0	2	0	0	0	0	7	0	OR85b	odorant receptor 85b
TRINITY_DN2271_c0_g1_i7	2	50.3	0	0	1	0	6.87	3	0	OR85b	odorant receptor 85b
TRINITY_DN4572_c0_g1_i1	42	32.81	0	0	3.99	0	0	27.6	0	OR85b	odorant receptor 85b
cluster_contig13821	2	0	0	0	0	0	0	4	0	OR85b	odorant receptor 85b
TRINITY_DN1814_c0_g1_i4	0	0	0	0	0	0	20.91	0	0	OR85b	odorant receptor 85b
cluster_contig11489	5	10	22.46	5	7.87	13.01	12	0	11.05	OR85B	Odorant receptor 85b
TRINITY_DN4265_c0_g1_i1	0	0	0	0	0	0	0	0	0	OB83A	General odorant-binding protein 83a
TRINITY_DN6268_c0_g1_i2	28.22	889.07	150.87	234.32	82.71	500.51	220.45	97.22	314.74	THK33131.1	chemosensory protein 1
TRINITY_DN1814_c0_g1_i3	3.24	50.83	1	0	1.13	0	30.76	3.4	0	OR85b	odorant receptor 85b
TRINITY_DN14977_c0_g1_i1	0	0	3	0	0	0	4	1	0	OR85b	odorant receptor 85b
TRINITY_DN17478_c0_g2_i1	0	0	0	0	1	3	0	0	0	OR85c	odorant receptor 85c
TRINITY_DN500_c0_g1_i2	0	2.92	13.85	266.95	1159.76	346.04	7.64	4.66	10.65	LOC103033887	olfactory receptor 142-like
TRINITY_DN23581_c0_g1_i1	0	2	0	0	0	3	0	0	5	OR85c	odorant receptor 85c-like isoform X2
TRINITY_DN17147_c0_g2_i1	0	0	0	0	0	0	0	0	0	OR85c	odorant receptor 85c-like
TRINITY_DN3853_c0_g1_i6	25.41	0	2.54	0	34.13	61.98	11.58	11.55	27.75	OR85D	Putative odorant receptor 85d
TRINITY_DN10469_c0_g1_i2	6	0	1	0	0	0	0	0	0	OR85d	putative odorant receptor 85d
TRINITY_DN657_c0_g3_i1	0	1.34	0	11.51	20.25	0	8.43	90.69	10.84	CSP	chemosensory protein
TRINITY_DN7265_c0_g2_i2	0	0	0	0	3.62	2.02	0	0	4.24	OR85D	Putative odorant receptor 85d
TRINITY_DN2493_c0_g2_i7	10	0	0	0	0	0	0	0	0	OR85d	putative odorant receptor 85d isoform X1
cluster_contig11752	6.07	25.02	26.54	4.49	44.55	27.67	22.75	33.64	0	IR25A	Ionotropic receptor 25a
TRINITY_DN16739_c0_g1_i1	0	0	1	14.57	0	17.17	0	5.24	0	OR85D	Putative odorant receptor 85d
TRINITY_DN20491_c0_g1_i1	0	0	0	0	0	0	0	0	0	OR85d	putative odorant receptor 85d
cluster_contig2301	11.48	17.24	10.94	5.43	24.37	0	7.58	1.73	5.14	OR85D	Putative odorant receptor 85d
TRINITY_DN7265_c0_g2_i1	6.52	2.76	3.06	0	9	14.14	7.57	7.03	14.62	OR85D	Putative odorant receptor 85d
TRINITY_DN5894_c0_g2_i1	0	0	0	0	0	0	1	0	0	OR85d	putative odorant receptor 85d
TRINITY_DN4008_c0_g1_i5	0	8.62	8.8	0	3.77	0	20.18	0	5.66	OR85D	Putative odorant receptor 85d
TRINITY_DN16244_c0_g1_i1	0	0	0	0	0	1	0	1	8	OR85d	putative odorant receptor 85d
TRINITY_DN4943_c0_g1_i1	0	0	8	0	2.42	0	3	3	7	OR85d	putative odorant receptor 85d
TRINITY_DN661_c1_g1_i1	4831	10671	12841	3933	13307	13343	8249	6772	8153	THK33221.1	chemosensory protein 4
TRINITY_DN7265_c0_g1_i1	0	0	0	0	0	1.67	0.84	0	0	OR85e	putative odorant receptor 85e
TRINITY_DN5831_c0_g1_i2	0	0	5	0	0	0	0	0	0	OR85e	putative odorant receptor 85e
TRINITY_DN22622_c0_g1_i1	0	3	1	2	8	2	1	0	4	OR85e	putative odorant receptor 85e
TRINITY_DN22945_c0_g1_i1	2	0	0	0	0	0	0	0	2	OR85E	Putative odorant receptor 85e
TRINITY_DN692_c0_g1_i2	32.3	8.91	43.97	0	62.53	105.94	22.49	9.51	16.23	AZQ24958.1	chemosensory protein, partial
TRINITY_DN22301_c0_g2_i1	3	0	0	0	0	0	0	0	0	OR85f	odorant receptor 85f-like
TRINITY_DN5577_c0_g3_i1	0	0	0	0	0	0	0	0	2	OR85f	odorant receptor 85f-like
TRINITY_DN16610_c0_g2_i1	0	1.53	0	6.89	9.57	0	0	3.15	12.32	GR28B	Putative gustatory receptor 28b
TRINITY_DN692_c0_g1_i6	104.06	0	0	0	0	0	0	0	0	AZQ24958.1	chemosensory protein, partial
TRINITY_DN5577_c0_g2_i1	0	0	0	0	0	0	0	0	4.82	OR85f	odorant receptor 85f-like
TRINITY_DN3525_c0_g1_i10	3.97	253.29	609.57	151.45	292.1	558.39	410.6	278.9	1.01	GR43A	gustatory receptor for sugar taste 43a-like isoform X2
cluster_contig8104	0	0	0	0	0	5	0	3	0	Gr15	gustatory receptor 15
TRINITY_DN34118_c0_g1_i1	0	0	0	0	0	0	1	0	0	OR85f	odorant receptor 85f-like
TRINITY_DN5577_c0_g1_i1	0	0	0	0	2	5	0	0	6	OR85f	odorant receptor 85f-like
TRINITY_DN16176_c0_g1_i1	0	0	0	0	3	0	0	0	3	OR85f	odorant receptor 85f-like
cluster_contig15132	0	1	0	0	5	3	0	0	0	OR85f	odorant receptor 85f-like
TRINITY_DN4206_c0_g1_i3	0	2.42	0	0	0	0	2.82	1.24	0	OR92A	Putative odorant receptor 92a
TRINITY_DN4008_c0_g1_i4	0	0	0	0	0	1	2	0	0	OR92a	putative odorant receptor 92a
TRINITY_DN36177_c0_g1_i1	0	0	0	0	0	0	2	0	0	OR92A	Putative odorant receptor 92a
TRINITY_DN21477_c0_g1_i1	0	0	0	0	0	6	0	0	3	OR92a	putative odorant receptor 92a
cluster_contig3234	9.37	6.45	16.33	19.98	26.01	51.57	19.67	11.44	13.49	OR92A	Putative odorant receptor 92a
TRINITY_DN7483_c0_g1_i1	0	3.1	1	1.35	8.55	5.23	2.02	4.85	2.05	THK33134.1	chemosensory protein 8
TRINITY_DN3475_c0_g1_i4	6.72	46.22	41.21	25.47	31.32	98.34	61.68	49.51	9.97	OB83A	General odorant-binding protein 83a
cluster_contig11267	0	0	4.72	0	0	0	0	0	0	OR92A	Putative odorant receptor 92a
TRINITY_DN12877_c0_g1_i1	10.51	0	4.49	0	10	22	7.85	0	7.81	OR92A	Putative odorant receptor 92a
TRINITY_DN15919_c0_g1_i3	5	1.3	16.01	2.67	0	3.98	3.67	0	0	OR92A	Putative odorant receptor 92a
TRINITY_DN10811_c0_g1_i2	0	0	0	0	0	0	2.2	5.16	0	OR92a	putative odorant receptor 92a
TRINITY_DN5058_c0_g1_i1	19.63	43.8	7.17	0	25.58	26.89	0	22.21	31.36	OB83A	General odorant-binding protein 83a
TRINITY_DN8648_c0_g1_i1	14.38	84.58	85.79	16.36	45.25	97.78	17.7	18.12	24.04	THK33220.1	chemosensory protein 3
TRINITY_DN8720_c0_g1_i3	0	0	0	0	2	0	0	0	0	OR92A	Putative odorant receptor 92a
TRINITY_DN3355_c0_g1_i1	38.2	47.49	27	0	42.28	60.15	21.63	53.11	31.87	OB83A	General odorant-binding protein 83a
TRINITY_DN22303_c0_g1_i1	3.63	0.25	0.65	2.34	0	0	0.18	8.86	9.82	OR92a	putative odorant receptor 92a
TRINITY_DN4008_c0_g1_i3	16.07	0	0	0	0	0	13.72	0	0	OR94A	Odorant receptor 94a
TRINITY_DN24834_c0_g1_i1	0	0	0	0	0	0	0	0	1.95	OR94A	Odorant receptor 94a
cluster_contig6813	3	7	0	11	5	14	0	0	0	OR94A	Odorant receptor 94a
TRINITY_DN2497_c1_g1_i2	8.22	3.28	7.12	0	15.74	9.32	8.8	2.74	7.57	OR94a	odorant receptor 94a
TRINITY_DN24844_c0_g1_i1	0	0	6	7	1	0	1	1	8	OR94A	Odorant receptor 94a
TRINITY_DN8654_c0_g1_i1	0	0	0	0	0	0	0	1	0	GR28a	Putative gustatory receptor 28a
TRINITY_DN9589_c0_g1_i1	0	0	0	5	1	1	0	0	0	OR94A	Odorant receptor 94a
TRINITY_DN16072_c0_g1_i1	0	0	0	0	0	0	0	0	0	OR94a	odorant receptor 94a
TRINITY_DN24240_c0_g1_i1	0	0	0	0	0	4	0	0	1	OR94a	odorant receptor 94a
TRINITY_DN25895_c0_g1_i1	0	0	0	0	0	0	0	0	2	OR94A	odorant receptor 94a-like
TRINITY_DN15577_c0_g1_i1	0	0	0	0	0	0	0	0	0	OR94a	odorant receptor 94a-like isoform X1
TRINITY_DN4424_c0_g1_i2	16.1	11.32	21.37	6.45	10.65	21.65	36.74	18.11	88.68	IR25A	Ionotropic receptor 25a
cluster_contig13669	20.53	6.56	8.12	0	9.32	20.22	0	1.61	2.56	OR94B	Odorant receptor 94b
TRINITY_DN23044_c0_g1_i1	0	10	0	0	10.22	0	0	0	6	OR98B	Putative odorant receptor 98b
TRINITY_DN34291_c0_g1_i1	0	0	0	0	0	0.43	1.64	0	0	OR98b	putative odorant receptor 98b
TRINITY_DN886_c0_g1_i5	0	386.05	67.67	0	397.94	0	1375.27	184.68	399.65	THK33176.1	chemosensory protein 6
TRINITY_DN31060_c0_g1_i1	0	1.33	0	5.16	7.94	29	5.36	0	0	OR98b	putative odorant receptor 98b
TRINITY_DN39556_c0_g1_i1	0	0	0	0	0.92	0	0	0	0	OR98b	putative odorant receptor 98b
TRINITY_DN24173_c0_g1_i1	0	2.67	7	3.84	5.92	2.57	0	0	11	OR98b	putative odorant receptor 98b
TRINITY_DN7622_c0_g1_i1	0	0	0	0	0	2	5	1	0	OR9A	Odorant receptor 9a
cluster_contig2429	3.62	7	34	0	11	20	1	1	1.36	OR9A	Odorant receptor 9a
cluster_contig14361	0	1.36	0	0	4.98	3.21	0	0	4.45	OR9A	Odorant receptor 9a
TRINITY_DN8937_c0_g1_i4	0	0	1	0	1.36	3.06	0	1	6.47	OR9A	odorant receptor 9a-like
TRINITY_DN1838_c0_g1_i1	0	11.06	127.66	0	86.22	23.31	20.07	13.02	30.74	OB69A	General odorant-binding protein 69a
TRINITY_DN8654_c0_g2_i1	0	0	0	0	0	0	0	0	0	GR28a	Putative gustatory receptor 28a
TRINITY_DN9691_c0_g2_i2	43.16	0	0	0	0	0.76	0	0	21.38	THK33222.1	chemosensory protein 5
cluster_contig13894	0	3.97	0	3.62	4.1	4.26	0	3	0	ORCO	Odorant receptor coreceptor
cluster_contig14018	151.97	511	254.74	144.31	430.71	369.37	296.47	196.89	397.84	ORCO	Odorant receptor coreceptor
cluster_contig14653	0	0	0	0	0	5	0	0	0	ORCO	Odorant receptor coreceptor
TRINITY_DN4667_c0_g1_i1	126.18	244	303.26	116.69	472.29	458.63	230.09	55.11	662.16	Orco	odorant receptor coreceptor
TRINITY_DN9922_c0_g1_i1	0	0	0	0	2.58	0	0	0	3.45	THK33134.1	chemosensory protein 8
TRINITY_DN22448_c0_g1_i1	0	0	2	0	2	0	0	0	8	ORCO	Odorant receptor coreceptor
TRINITY_DN18634_c0_g1_i1	2	30.03	9	3.38	13.9	15.74	3	0	27	ORCO	Odorant receptor coreceptor
TRINITY_DN27112_c0_g1_i1	0	0	0	0	0	0	0	3	0	Orco	odorant receptor coreceptor-like
TRINITY_DN12532_c0_g1_i1	9	1	5	3	5	1	0	1	7	ORCO	Odorant receptor coreceptor
TRINITY_DN7095_c0_g4_i2	0.86	0	0	0	0	0	15.43	0	0	Orco	odorant receptor coreceptor
cluster_contig2129	14	11.46	9	5	14.83	27.14	7.87	3.42	19	SNMP2	Sensory neuron membrane protein 2
cluster_contig237	3.42	71.2	58.99	68.67	85.69	115.94	16.92	36.83	48.47	SNMP1	Sensory neuron membrane protein 1
cluster_contig4264	28.01	96.6	85.99	26.98	108.21	84.49	67.42	20.89	52.6	SNMP1	Sensory neuron membrane protein 1
TRINITY_DN1058_c1_g1_i1	0	0	5	0	0	0	0	0	0	SNMP1	Sensory neuron membrane protein 1
TRINITY_DN1867_c0_g2_i1	15	158.1	87.07	73.02	134.91	44	34.2	50.48	66.55	SNMP1	Sensory neuron membrane protein 1-like
TRINITY_DN1934_c0_g1_i1	678	5092.9	4931.93	1965.98	3422.95	5508	3549.41	4426.18	7376.45	SNMP1	Sensory neuron membrane protein 1
TRINITY_DN2526_c0_g1_i1	16.2	7.86	9.91	2	11.84	15.45	30.91	18.39	46.05	SNMP1	Sensory neuron membrane protein 1
TRINITY_DN2526_c0_g2_i1	7.79	4.54	4.1	3.03	1.94	64.05	1.34	21.72	74.34	SNMP1	Sensory neuron membrane protein 1
TRINITY_DN39280_c0_g1_i1	0	0	0	0	0	0	9.33	0	0	SNMP1	Sensory neuron membrane protein 1
TRINITY_DN4108_c0_g2_i1	0	2	0	1	1	3	11	0	1	SNMP1	Sensory neuron membrane protein 1
TRINITY_DN4634_c0_g1_i3	0	1.54	0	0	3.17	24.86	7.13	2.58	0	SNMP2	Sensory neuron membrane protein 2
TRINITY_DN4669_c1_g1_i1	77.82	257.69	195.36	62.33	246.32	306.1	145.21	112.55	361.14	SNMP1	Sensory neuron membrane protein 1
TRINITY_DN990_c0_g1_i1	0	0	0	0	72.16	0	216.59	35.95	0	SNMP1	Sensory neuron membrane protein 1
