# Supplementary material for: De Novo Transcriptome Identifies Olfactory Genes in Diachasmimorpha longicaudata (Ashmead)
Source: Genes (Basel). 2020 Jan 29;11(2):144. doi: 10.3390/genes11020144 (PMC7074194; doi:10.3390/genes11020144)
Supplement: Supplementary file 1 [file genes-11-00144-s001.gz › Table S3.xlsx]

## Sheet: Sheet1
Table S3. OBP and CSP sequences for the phylogenetic analysis.
ID	Species	TranscriptID	Description
OBP1	Diachasmimorpha longicaudata	TRINITY_DN22_c0_g3_i1	General odorant-binding protein 56d
OBP2	Diachasmimorpha longicaudata	TRINITY_DN23528_c0_g1_i1	General odorant-binding protein 56
OBP3	Diachasmimorpha longicaudata	TRINITY_DN3641_c0_g2_i1	General odorant-binding protein 69a
OBP4	Diachasmimorpha longicaudata	cluster_contig3738	General odorant-binding protein 69a
OBP5	Diachasmimorpha longicaudata	cluster_contig4670	General odorant-binding protein 56h
OBP1	Aethina tumida	XP_019866305.1	general odorant-binding protein 56d-like
OBP1	Aphidius gifuensis	AZQ25002.1	odorant-binding protein
OBP1	Cephus cinctus	XP_015603383.1	general odorant-binding protein 56d-like
OBP1	Cotesia chilonis	QBB02065.1	putative general odorant-binding protein 83a-like, partial
OBP2	Cotesia chilonis	QBB02090.1	odorant-binding protein 10, partial
OBP1	Diachasma alloeum	XP_015125079.1	general odorant-binding protein 56d
OBP2	Diachasma alloeum	XP_015113058.1	general odorant-binding protein 56d
OBP3	Diachasma alloeum	XP_015114445.1	uncharacterized protein LOC107039382
OBP4	Diachasma alloeum	XP_015125081.1	general odorant-binding protein 69a
OBP5	Diachasma alloeum	XP_015114461.1	general odorant-binding protein 69a isoform X1
OBP6	Diachasma alloeum	XP_015109650.1	general odorant-binding protein 83a
OBP7	Diachasma alloeum	XP_015118617.1	general odorant-binding protein 83a
OBP1	Fopius arisanus	XP_011311566.1	PREDICTED: general odorant-binding protein 56a-like
OBP2	Fopius arisanus	XP_011299086.1	PREDICTED: general odorant-binding protein 56d-like
OBP3	Fopius arisanus	XP_011299167.1	PREDICTED: general odorant-binding protein 83a-like
OBP4	Fopius arisanus	XP_011312148.1	PREDICTED: general odorant-binding protein 72-like
OBP1	Megachile rotundata	XP_003708550.1	PREDICTED: general odorant-binding protein 56a-like
OBP1	Meteorus pulchricornis	AQN78389.1	odorant-binding protein 11
OBP1	Microplitis demolitor	XP_008548247.1	PREDICTED: general odorant-binding protein 56d
OBP2	Microplitis demolitor	XP_008548248.1	PREDICTED: general odorant-binding protein 56d
OBP3	Microplitis demolitor	XP_008559485.1	PREDICTED: general odorant-binding protein 69a
OBP4	Microplitis demolitor	XP_014299218.1	PREDICTED: general odorant-binding protein 72
OBP1	Microplitis mediator	ANT46046.1	odorant-binding protein 17
OBP2	Microplitis mediator	ANT46045.1	odorant-binding protein 16
OBP3	Microplitis mediator	AEO27860.1	odorant-binding protein 10
CSP1	Diachasmimorpha longicaudata	TRINITY_DN1018_c0_g1_i5	chemosensory protein
CSP2	Diachasmimorpha longicaudata	TRINITY_DN1848_c0_g1_i6	chemosensory protein
CSP3	Diachasmimorpha longicaudata	TRINITY_DN4258_c0_g1_i1	chemosensory protein, partial
CSP4	Diachasmimorpha longicaudata	TRINITY_DN661_c1_g1_i1	chemosensory protein 4
CSP5	Diachasmimorpha longicaudata	cluster_contig14748	chemosensory protein 5
CSP1	Vespa velutina	AXF54361.1	chemosensory protein 1, partial
CSP2	Vespa velutina	AXF54362.1	chemosensory protein 2, partial
CSP5	Cephus cinctus	ARN17836.1	chemosensory protein 5
CSP4	Cephus cinctus	ARN17835.1	chemosensory protein 4
CSP3	Cephus cinctus	ARN17834.1	chemosensory protein 3
CSP2	Cephus cinctus	ARN17833.1	chemosensory protein 2
CSP1	Cephus cinctus	ARN17832.1	chemosensory protein 1
CSP6	Sclerodermus	ALG36159.1	chemosensory protein 6
CSP5	Sclerodermus	ALG36158.1	chemosensory protein 5
CSP4	Sclerodermus	ALG36157.1	chemosensory protein 4
CSP3	Sclerodermus	ALG36156.1	chemosensory protein 3
CSP2	Sclerodermus	ALG36155.1	chemosensory protein 2
CSP1	Meteorus pulchricornis	AQN78395.1	chemosensory protein 1
CSP2	Meteorus pulchricornis	AQN78396.1	chemosensory protein 2
CSP3	Meteorus pulchricornis	AQN78397.1	chemosensory protein 3
CSP4	Meteorus pulchricornis	AQN78398.1	chemosensory protein 4
CSP5	Meteorus pulchricornis	AQN78399.1	chemosensory protein 5
CSP1	Yemma signatus	AYN07329.1	chemosensory protein 1
CSP2	Yemma signatus	AYN07330.1	chemosensory protein 2, partial
CSP3	Yemma signatus	AYN07331.1	chemosensory protein 3
CSP4	Yemma signatus	AYN07332.1	chemosensory protein 4
CSP5	Yemma signatus	AYN07333.1	chemosensory protein 5
