# Supplementary material for: De Novo Transcriptome Identifies Olfactory Genes in Diachasmimorpha longicaudata (Ashmead)
Source: Genes (Basel). 2020 Jan 29;11(2):144. doi: 10.3390/genes11020144 (PMC7074194; doi:10.3390/genes11020144)
Supplement: Supplementary file 1 [file genes-11-00144-s001.gz › Table S4.xlsx]

## Sheet: Sheet1
Table S4. Differentially expressed transcripts in the parasitoid wasps of fruit flies fed with different fruits.
TranscriptID	C_vs_G(logFC)	C_vs_G(FDR)	C_vs_G(Regulation)	C_vs_M(logFC)	C_vs_M(FDR)	C_vs_M(Regulation)	M_vs_G(logFC)	M_vs_G(FDR)	M_vs_G(Regulation)	symbol	description
cluster_contig10005	11.0508	4.55e-35	UP	0.511468	0.339618	NC	10.4469	3.75e-31	UP	PCX1_MOUSE	Pecanex-like protein 1
cluster_contig10008	-0.0418432	1	NC	-1.12489	0.0388751	NC	1.10063	0.0314808	UP	RAPH1_HUMAN	Ras-associated and pleckstrin homology domains-containing protein 1
cluster_contig1001	-2.40644	3.4e-07	DOWN	-1.39878	0.00875425	DOWN	-0.995598	0.0336924	NC
cluster_contig10011	1.25455	0.00368518	UP	0.367618	0.505007	NC	0.900779	0.0470598	NC	HOT_AEDAE	Probable hydroxyacid-oxoacid transhydrogenase, mitochondrial
cluster_contig10014	-0.0355322	1	NC	-1.59019	0.0012308	DOWN	1.56772	0.0014321	UP
cluster_contig10020	-3.55307	7.19e-08	DOWN	0	1	NC	-7.49427	3.17e-11	DOWN
cluster_contig10024	1.22063	0.00551525	UP	1.65728	0.000144252	UP	-0.427701	0.426981	NC	PAN2_CHICK	PAB-dependent poly(A)-specific ribonuclease subunit PAN2 {ECO:0000255|HAMAP-Rule:MF_03182}
cluster_contig10025	-0.832764	0.0738883	NC	-1.48729	0.000704669	DOWN	0.668405	0.165962	NC	COR2B_XENTR	Coronin-2B
cluster_contig10030	0.774513	0.229271	NC	-0.361646	0.597479	NC	1.14712	0.046601	UP	LOLA3_DROME	Longitudinals lacking protein, isoforms A/B/D/L
cluster_contig10034	1.67421	0.000942649	UP	-0.304387	0.669045	NC	1.982	7.97e-05	UP	TT30A_XENTR	Tetratricopeptide repeat protein 30A
cluster_contig10037	1.74812	9.24e-05	UP	2.03777	9.72e-06	UP	-0.278132	0.714957	NC	DOA_DROME	Serine/threonine-protein kinase Doa
cluster_contig10040	-6.44431	2.22e-33	DOWN	0	1	NC	-6.36396	4.79e-31	DOWN	NPDC1_HUMAN	Neural proliferation differentiation and control protein 1
cluster_contig10053	0.370949	0.542532	NC	1.00712	0.0421174	UP	-0.62257	0.250037	NC	S38AA_XENLA	Putative sodium-coupled neutral amino acid transporter 10
cluster_contig10054	0	1	NC	-3.33503	1.53e-09	NC	2.10512	5.84e-05	UP	MACF1_MOUSE	Microtubule-actin cross-linking factor 1
cluster_contig10064	-0.325086	0.54641	NC	1.19555	0.00673614	UP	-1.51287	0.000400587	DOWN	PELP1_XENLA	Proline-, glutamic acid- and leucine-rich protein 1
cluster_contig10066	-1.82109	2.29e-05	DOWN	-1.14381	0.01266	DOWN	-0.660786	0.169803	NC	RN19A_HUMAN	E3 ubiquitin-protein ligase RNF19A
cluster_contig10070	1.30859	0.00244951	UP	-0.211001	0.734476	NC	1.52474	0.000367393	UP	PYG_DROME	Glycogen phosphorylase
cluster_contig10071	-1.70007	0.000705166	DOWN	-2.00866	5.21e-05	DOWN	0.326047	0.56642	NC	PLXA4_HUMAN	Plexin-A4
cluster_contig10075	-0.973079	0.0392573	NC	0.780837	0.111568	NC	-1.74266	7.81e-05	DOWN	CF2_DROME	Chorion transcription factor Cf2
cluster_contig10078	0.697951	0.155919	NC	1.09467	0.0173688	UP	-0.38555	0.470858	NC
cluster_contig10086	-0.950279	0.0481147	NC	0.666001	0.185563	NC	-1.61145	0.000326482	DOWN	ACO11_SPOLI	Acyl-CoA Delta(11) desaturase
cluster_contig10087	0	1	NC	-1.46356	0.00547476	DOWN	3.05025	4.27e-08	NC
cluster_contig10088	-1.04681	0.0184658	DOWN	-0.27413	0.649928	NC	-0.764818	0.100861	NC	GARL3_HUMAN	GTPase-activating Rap/Ran-GAP domain-like protein 3
cluster_contig1010	-0.655971	0.195512	NC	-1.0138	0.0337121	DOWN	0.372493	0.49082	NC	AFAD_MOUSE	Afadin
cluster_contig10107	-1.59361	0.000233613	DOWN	-2.02338	2.56e-06	DOWN	0.438055	0.395375	NC	TRET1_BOMMO	Facilitated trehalose transporter Tret1 {ECO:0000303|PubMed:20035867}
cluster_contig10115	1.86675	1.67e-05	UP	0.405883	0.463608	NC	1.47132	0.000897108	UP
cluster_contig10117	0	1	NC	-2.7029	1.01e-07	DOWN	3.49145	3.58e-10	NC	NSUN2_DROME	tRNA (cytosine(34)-C(5))-methyltransferase
cluster_contig10119	0.287002	0.657495	NC	8.86363	4.14e-18	UP	-8.46618	6.89e-17	DOWN	NCDN_DROME	Neurochondrin homolog
cluster_contig10122	-0.173249	0.790764	NC	1.29376	0.00771365	NC	-1.4621	0.00205691	DOWN	ZDHC2_HUMAN	Palmitoyltransferase ZDHHC2
cluster_contig10123	0.147351	0.848156	NC	8.71459	3.84e-17	UP	-8.45839	8.13e-17	DOWN	PPAN_DROME	Protein Peter pan
cluster_contig10129	-1.61712	0.00359229	DOWN	0	1	NC	-0.979694	0.0599378	NC	OR13A	Odorant receptor 13a
cluster_contig10134	0	1	NC	-0.72536	0.316379	NC	1.41289	0.0225821	UP	GRIK2_XENLA	Glutamate receptor ionotropic, kainate 2
cluster_contig10135	-1.92798	2.09e-05	DOWN	-0.867751	0.103524	NC	-1.0413	0.0277388	DOWN	DUT_RAT	Deoxyuridine 5'-triphosphate nucleotidohydrolase
cluster_contig10137	-0.538693	0.268224	NC	0.706642	0.141533	NC	-1.23655	0.00436755	DOWN	XP_015120318.1	PREDICTED: glycine-rich cell wall structural protein 1.8-like isoform X1 [Diachasma alloeum] &gt;XP_015120319.1 PREDICTED: glycine-rich cell wall structural protein 1.8-like isoform X2 [Diachasma alloeum]
cluster_contig1014	0	1	NC	-1.68866	0.00109049	DOWN	3.7224	7.33e-11	NC
cluster_contig10151	-2.20369	7.75e-06	DOWN	6.8971	2.24e-08	UP	-8.98848	2.45e-20	DOWN	MPC2_HUMAN	Mitochondrial pyruvate carrier 2
cluster_contig10158	-1.08985	0.0257865	NC	-1.6151	0.000539076	DOWN	0.54054	0.298441	NC	VDDP4_VESVU	Venom dipeptidyl peptidase 4
cluster_contig10159	-1.22284	0.00984889	DOWN	-0.84064	0.0990677	NC	-0.371362	0.559789	NC	VAMP2_XENLA	Vesicle-associated membrane protein 2
cluster_contig10164	1.0635	0.0203112	UP	0.974718	0.0359518	NC	0.0886997	0.92343	NC	UNC22_CAEEL	Twitchin {ECO:0000303|PubMed:7190524}
cluster_contig10166	2.17467	1.03e-05	NC	8.83876	6.24e-18	UP	-6.54897	6.15e-07	NC	NDRG3_PONAB	Protein NDRG3
cluster_contig10178	1.35983	0.00533761	UP	2.94262	3.67e-09	NC	0	1	NC	TRPV6_MOUSE	Transient receptor potential cation channel subfamily V member 6
cluster_contig10179	1.4081	0.0220361	UP	0.050837	1	NC	0	1	NC	TRPV6_MOUSE	Transient receptor potential cation channel subfamily V member 6
cluster_contig10184	-1.83334	3.76e-05	DOWN	-0.988971	0.0512494	NC	-0.828214	0.0725102	NC	ABI2_MOUSE	Abl interactor 2
cluster_contig10185	-7.91082	1.3e-13	DOWN	0	1	NC	-2.89402	1.51e-05	DOWN	VIP1_DROME	Inositol hexakisphosphate and diphosphoinositol-pentakisphosphate kinase
cluster_contig1019	-2.02983	0.000510351	DOWN	-2.42712	1.15e-05	NC	0.417172	0.399683	NC
cluster_contig10190	0.567891	0.324932	NC	-4.86393	1.58e-24	DOWN	5.4518	1.4e-28	NC	DYST_HUMAN	Dystonin
cluster_contig10199	0	1	NC	-2.34369	0.000396347	DOWN	0.379648	0.690605	NC
cluster_contig10205	-1.63609	0.000123489	DOWN	0.549669	0.27537	NC	-2.17238	2.66e-07	DOWN	SDCB1_RAT	Syntenin-1
cluster_contig10213	-0.529755	0.303501	NC	2.14291	2.02e-06	UP	-2.66618	2.41e-09	DOWN	PRP39_DANRE	Pre-mRNA-processing factor 39
cluster_contig10214	0.825466	0.0892737	NC	1.23981	0.00561848	UP	-0.407267	0.414361	NC	ITA4_MOUSE	Integrin alpha-4
cluster_contig10219	-1.04146	0.0355654	DOWN	-0.480262	0.357495	NC	-0.543411	0.45264	NC
cluster_contig10222	2.59322	5.41e-05	UP	0.103659	0.825955	NC	2.49679	0.000430215	UP	B9D2_DANRE	B9 domain-containing protein 2
cluster_contig10224	2.06521	0.00165995	UP	0.360751	0.50679	NC	1.71253	0.0312025	UP
cluster_contig10238	-1.02702	0.0325949	DOWN	-0.412354	0.512265	NC	-0.601709	0.259497	NC	UBTD1_DANRE	Ubiquitin domain-containing protein 1
cluster_contig10241	-1.35387	0.0192042	DOWN	-1.7082	0.0023637	DOWN	0.36108	0.633957	NC	GXLT1_HUMAN	Glucoside xylosyltransferase 1
cluster_contig10246	-0.615976	0.235556	NC	-2.16182	9.83e-07	NC	1.55836	0.000435916	UP	NCKXH_DROME	Probable sodium/potassium/calcium exchanger CG1090
cluster_contig10255	-0.759004	0.121486	NC	-1.79527	4.46e-05	DOWN	1.04532	0.0220574	UP	XP_015110587.1	PREDICTED: uncharacterized protein LOC107036872 [Diachasma alloeum]
cluster_contig10257	-0.440985	0.41636	NC	0.609915	0.277003	NC	-1.03934	0.0345847	DOWN	ROR1_DROME	Tyrosine-protein kinase transmembrane receptor Ror
cluster_contig10263	-8.86424	9.28e-20	DOWN	-6.52115	1.5e-06	NC	-2.33559	1.69e-06	NC
cluster_contig10266	-1.02233	0.0211437	DOWN	-1.85794	1.2e-05	DOWN	0.848915	0.0632297	NC	MVL_DROME	Protein Malvolio
cluster_contig10267	-1.74496	0.000774871	NC	0.555357	0.375316	NC	-2.29117	1.09e-05	DOWN	CSP	chemosensory protein
cluster_contig10268	0.859141	0.0578446	NC	1.4629	0.000676572	UP	-0.594422	0.217899	NC	MVL_DROME	Protein Malvolio
cluster_contig10270	-0.74578	0.108534	NC	0.964375	0.0351405	NC	-1.69676	6.74e-05	DOWN	SDA1_HUMAN	Protein SDA1 homolog
cluster_contig10272	-7.28965	2.7e-10	DOWN	0	1	NC	-2.11071	0.000812448	NC
cluster_contig10275	-0.880328	0.0807596	NC	0.744843	0.28944	NC	-1.6079	0.0030283	DOWN
cluster_contig10276	0.501045	0.401564	NC	1.15192	0.0195543	UP	-0.645253	0.21089	NC	TLK2_DANRE	Serine/threonine-protein kinase tousled-like 2 {ECO:0000250|UniProtKB:Q86UE8}
cluster_contig10279	-4.24058	1.02e-17	DOWN	-3.29846	3.09e-11	DOWN	-0.930749	0.0530352	NC	VGFR1_CHICK	Vascular endothelial growth factor receptor 1
cluster_contig10280	-7.67046	2.55e-12	DOWN	-8.52815	5.03e-17	DOWN	0.863853	0.0880145	NC	KIT_FSVHZ	Tyrosine-protein kinase transforming protein kit
cluster_contig10284	2.57545	8.62e-09	UP	1.88424	2.21e-05	UP	0.707102	0.203509	NC	GRM1B_HUMAN	GRAM domain-containing protein 1B
cluster_contig10290	-2.41671	2.96e-07	NC	-1.00343	0.0925202	NC	-1.4071	0.00206234	DOWN	LBR_CHICK	Lamin-B receptor
cluster_contig10292	-2.22712	4.23e-05	DOWN	-1.32505	0.0446428	DOWN	-0.89063	0.0950466	NC	NUDT6_ARATH	Nudix hydrolase 6
cluster_contig10294	0.109812	0.876143	NC	-1.23419	0.00684369	DOWN	1.36243	0.00240545	UP	DPY19_CAEEL	C-mannosyltransferase dpy-19
cluster_contig1030	0.890128	0.0558505	NC	-0.340299	0.563182	NC	1.24478	0.00583666	UP
cluster_contig10304	-8.79213	3.16e-19	DOWN	-7.11496	6.19e-09	NC	-1.67066	0.000530524	NC	NFIA_RAT	Nuclear factor 1 A-type
cluster_contig10307	-1.34185	0.00808694	DOWN	2.11726	0.0015856	UP	-3.45085	4.2e-09	DOWN
cluster_contig10313	1.07504	0.0220425	UP	-0.653791	0.194525	NC	1.73972	9.02e-05	UP	PNR_DROME	GATA-binding factor A
cluster_contig10317	-1.06235	0.0200583	DOWN	-0.459042	0.442738	NC	-0.590388	0.2189	NC	AATM_XENTR	Aspartate aminotransferase, mitochondrial
cluster_contig10322	-1.20011	0.00837516	DOWN	-0.0626408	0.962649	NC	-1.12476	0.0133577	DOWN	UNC89_CAEEL	Muscle M-line assembly protein unc-89
cluster_contig10323	1.07428	0.0371266	UP	-0.204765	0.771001	NC	1.29795	0.0113929	NC
cluster_contig10334	0.364124	0.525573	NC	-1.07939	0.0235851	DOWN	1.46105	0.00138401	UP	SPAST_DROGR	Spastin {ECO:0000255|HAMAP-Rule:MF_03021}
cluster_contig10335	-0.350998	0.568662	NC	-1.55064	0.00109417	DOWN	1.21069	0.0133294	UP	ZFHX3_MOUSE	Zinc finger homeobox protein 3
cluster_contig10338	-1.04854	0.0273564	DOWN	-1.1853	0.0143746	NC	0.157448	0.83079	NC	CCNT2_HUMAN	Cyclin-T2
cluster_contig10339	0	1	NC	-1.74255	0.0152446	DOWN	0.125358	1	NC
cluster_contig1034	0	1	NC	-1.63363	0.00320487	DOWN	2.59437	9.68e-06	NC	TSNAX_RAT	Translin-associated protein X
cluster_contig10344	9.57931	5.42e-25	UP	0.183945	0.745576	NC	9.30891	1.65e-22	NC	CA1AB_XENLA	Chromatin assembly factor 1 subunit A-B
cluster_contig10348	1.03046	0.0239851	UP	0.621726	0.227376	NC	0.41418	0.445737	NC	PDE4A_DROME	cAMP-specific 3',5'-cyclic phosphodiesterase, isoform I
cluster_contig10354	-1.45374	0.000887489	DOWN	-0.971019	0.0398464	NC	-0.472378	0.358879	NC	LRC59_CHICK	Leucine-rich repeat-containing protein 59
cluster_contig10359	-0.23412	0.681059	NC	1.36457	0.00280357	UP	-1.58764	0.000355905	DOWN	VATA_AEDAL	V-type proton ATPase catalytic subunit A
cluster_contig10364	-1.42591	0.00477181	DOWN	-1.07012	0.0592282	NC	-0.345336	0.545795	NC	TRYT_DROME	Trypsin theta
cluster_contig10365	-2.23316	0.000341639	DOWN	0	1	NC	-7.08415	2.9e-09	DOWN	CTRC_BOVIN	Chymotrypsin-C
cluster_contig10367	1.43772	0.00132948	UP	1.84661	1.87e-05	NC	-0.408806	0.410687	NC	Y34F_DROME	Uncharacterized protein CG43867
cluster_contig1037	-1.22574	0.01062	DOWN	0.171263	0.901931	NC	-1.38204	0.00789786	DOWN
cluster_contig10376	-2.26592	3.61e-06	DOWN	0	1	NC	-2.44484	3.45e-06	NC	PRS55_HUMAN	Serine protease 55
cluster_contig10378	1.86266	1.42e-05	NC	8.96196	2.75e-39	UP	-7.08757	1.61e-24	NC	PIPA_DROME	1-phosphatidylinositol 4,5-bisphosphate phosphodiesterase
cluster_contig10382	-1.50549	0.00288803	NC	-0.370826	0.730907	NC	-1.11923	0.0248707	DOWN
cluster_contig10385	1.80626	0.00515069	UP	0.0739853	1	NC	0	1	NC	RU2B_MOUSE	U2 small nuclear ribonucleoprotein B''
cluster_contig10386	-0.83515	0.0735998	NC	0.41881	0.437297	NC	-1.23974	0.00501422	DOWN	PPIA_BLAGE	Peptidyl-prolyl cis-trans isomerase
cluster_contig1039	-4.62825	1.72e-14	NC	0	1	NC	-8.77348	6.86e-19	DOWN	ENDOU_DROME	Poly(U)-specific endoribonuclease homolog
cluster_contig104	-1.80821	3.99e-05	DOWN	-0.672663	0.208258	NC	-1.12585	0.0127784	DOWN	MOT9_HUMAN	Monocarboxylate transporter 9
cluster_contig10405	0.216887	0.737262	NC	-1.13747	0.015136	DOWN	1.35874	0.00309842	UP	PPM1J_HUMAN	Protein phosphatase 1J
cluster_contig10412	-1.70136	0.00026779	NC	-0.691784	0.283666	NC	-1.0003	0.0322707	DOWN
cluster_contig1042	1.18371	0.0087951	UP	0.405835	0.457453	NC	0.781605	0.111939	NC	DPOLA_HUMAN	DNA polymerase alpha catalytic subunit
cluster_contig10423	1.21244	0.00912915	UP	1.08835	0.0173184	UP	0.14178	0.897031	NC	BAZ2B_HUMAN	Bromodomain adjacent to zinc finger domain protein 2B
cluster_contig10425	-0.224476	0.707773	NC	-1.65063	0.000147827	DOWN	1.44007	0.000933796	UP	AQR_HUMAN	Intron-binding protein aquarius
cluster_contig10427	7.2051	3.57e-10	NC	0.160016	0.70424	NC	6.95274	2.7e-08	UP	REPS1_MOUSE	RalBP1-associated Eps domain-containing protein 1
cluster_contig10429	1.3255	0.0104093	UP	-1.30361	0.00602303	DOWN	2.64122	2.96e-08	UP	ATNA_DROME	Sodium/potassium-transporting ATPase subunit alpha
cluster_contig1044	-1.11097	0.018226	DOWN	-1.04335	0.0336167	DOWN	-0.0583857	0.927116	NC	LIPB1_MOUSE	Liprin-beta-1
cluster_contig10444	1.56146	0.000848811	UP	0.32209	0.551621	NC	1.24892	0.0137536	UP	DNJC7_MOUSE	DnaJ homolog subfamily C member 7
cluster_contig10449	-0.117718	0.889491	NC	-1.35881	0.0071779	DOWN	1.25386	0.0138409	UP
cluster_contig10450	1.86459	5.27e-05	UP	-0.251465	0.708302	NC	2.12525	3.74e-06	UP	ZCHC7_XENLA	Zinc finger CCHC domain-containing protein 7
cluster_contig10453	-9.0737	3.57e-21	NC	-8.57075	3.11e-17	DOWN	-0.509905	0.43657	NC	SNUT2_MOUSE	U4/U6.U5 tri-snRNP-associated protein 2
cluster_contig10455	-1.78981	0.000113371	DOWN	-0.499838	0.488556	NC	-1.27857	0.00411646	DOWN	XKR6_TETNG	XK-related protein 6
cluster_contig10463	-1.59497	0.000647881	DOWN	-0.456803	0.452556	NC	-1.12239	0.0266106	DOWN	AURKB_DROME	Aurora kinase B
cluster_contig10470	-1.34969	0.00195136	NC	0.797786	0.0872024	NC	-2.14091	4.23e-07	DOWN	XP_015123420.1	PREDICTED: uncharacterized protein LOC107045610 [Diachasma alloeum]
cluster_contig10480	1.24992	0.0060855	UP	-0.57187	0.267627	NC	1.83496	3.44e-05	UP
cluster_contig10492	0.168269	0.783411	NC	1.54251	0.000387389	UP	-1.37046	0.00160037	DOWN	OLM2B_HUMAN	Olfactomedin-like protein 2B
cluster_contig10504	-1.69682	0.000937971	DOWN	-0.890452	0.177473	NC	-0.792357	0.113352	NC	MMP17_HUMAN	Matrix metalloproteinase-17
cluster_contig10507	-0.532551	0.407285	NC	-1.24207	0.0216421	DOWN	0.717545	0.240593	NC	ACSF2_MACFA	Acyl-CoA synthetase family member 2, mitochondrial
cluster_contig10529	0.405831	0.437963	NC	1.10073	0.0157519	UP	-0.684958	0.15771	NC	N42L1_MOUSE	NEDD4-binding protein 2-like 1
cluster_contig10532	1.28973	0.00457484	UP	0.0712024	0.953698	NC	1.23188	0.00730728	UP	SETX_MOUSE	Probable helicase senataxin
cluster_contig10535	-1.03924	0.0182585	DOWN	-0.493999	0.339981	NC	-0.533079	0.279268	NC	TREA_PIMHY	Trehalase
cluster_contig10537	-1.96896	3.58e-06	DOWN	0.653037	0.197196	NC	-2.60437	1.32e-09	NC	MCM6_ANOGA	DNA replication licensing factor Mcm6
cluster_contig10545	0.986132	0.0378231	NC	-0.580321	0.267944	NC	1.57639	0.000467016	UP	T132E_HUMAN	Transmembrane protein 132E
cluster_contig10552	-1.66096	0.00189437	DOWN	0	1	NC	-0.855942	0.121879	NC	RERE_HUMAN	Arginine-glutamic acid dipeptide repeats protein
cluster_contig10554	-0.698031	0.14347	NC	-1.10971	0.0145192	DOWN	0.415649	0.430857	NC	ASM_HUMAN	Sphingomyelin phosphodiesterase
cluster_contig10556	-0.877583	0.120547	NC	-1.30515	0.0128098	DOWN	0.435532	0.497656	NC	ANR28_HUMAN	Serine/threonine-protein phosphatase 6 regulatory ankyrin repeat subunit A
cluster_contig10557	-1.94203	3.33e-05	DOWN	-1.37689	0.00555092	DOWN	-0.550493	0.380297	NC
cluster_contig10559	1.24242	0.00708265	UP	-0.504821	0.345508	NC	1.76399	7.86e-05	UP	NLRC5_HUMAN	Protein NLRC5
cluster_contig1056	-1.14492	0.0207304	DOWN	-0.418814	0.510766	NC	-0.714431	0.221876	NC	GP152_HUMAN	Probable G-protein coupled receptor 152
cluster_contig10568	1.43648	0.00140535	UP	0.751927	0.142997	NC	0.703491	0.1586	NC	FAT2_DROME	Fat-like cadherin-related tumor suppressor homolog
cluster_contig10569	0.761166	0.141296	NC	-1.33183	0.00416302	DOWN	2.10467	3.38e-06	UP	FAT2_DROME	Fat-like cadherin-related tumor suppressor homolog
cluster_contig10571	-1.1579	0.00789773	DOWN	-0.00105969	1	NC	-1.14602	0.00923177	DOWN	SYWC_BOVIN	Tryptophan--tRNA ligase, cytoplasmic
cluster_contig10575	-1.53564	0.00031835	DOWN	0.10413	0.882921	NC	-1.63433	0.000125585	DOWN	TRIPC_RAT	E3 ubiquitin-protein ligase TRIP12
cluster_contig10578	-0.954479	0.0387061	NC	-1.57491	0.000337637	DOWN	0.633989	0.192191	NC	SYLM_HUMAN	Probable leucine--tRNA ligase, mitochondrial
cluster_contig10579	-0.239906	0.669154	NC	0.872057	0.0607379	NC	-1.10006	0.0128627	DOWN	KGP1_DROME	cGMP-dependent protein kinase, isozyme 1
cluster_contig10590	-2.73956	4.6e-08	DOWN	-2.41677	2.43e-06	DOWN	-0.308811	0.658169	NC
cluster_contig10593	-0.37426	0.52719	NC	-1.6391	0.000316364	NC	1.27305	0.00632015	UP	MTG1_AEDAE	Mitochondrial GTPase 1 {ECO:0000250|UniProtKB:Q9BT17}
cluster_contig10596	0.793565	0.144777	NC	-1.22325	0.010567	DOWN	2.03193	1.42e-05	NC	CDK2_CARAU	Cyclin-dependent kinase 2
cluster_contig10608	0.361008	0.509059	NC	1.25329	0.00557707	UP	-0.886688	0.0588385	NC
cluster_contig10609	1.75809	0.000328699	UP	1.47904	0.00131528	UP	0.286592	0.840329	NC
cluster_contig10616	-1.13899	0.0117384	DOWN	-0.409735	0.462847	NC	-0.714569	0.1521	NC	IN80B_HUMAN	INO80 complex subunit B
cluster_contig10636	0	1	NC	-1.30635	0.0161799	DOWN	1.26772	0.0198629	UP	OR10A	Odorant receptor 10a
cluster_contig10637	0.505754	0.328062	NC	1.04689	0.025651	UP	-0.535649	0.300276	NC	DDX27_MOUSE	Probable ATP-dependent RNA helicase DDX27
cluster_contig10639	1.35182	0.00759443	NC	-1.68367	0.00043436	DOWN	3.04809	2.14e-10	NC	THOC2_CALMO	THO complex subunit 2
cluster_contig1065	1.57747	0.00103012	UP	1.42369	0.00250742	UP	0.162363	0.895971	NC
cluster_contig10655	-0.662003	0.157929	NC	0.491598	0.342574	NC	-1.1467	0.00875494	DOWN	AL1A7_MOUSE	Aldehyde dehydrogenase, cytosolic 1
cluster_contig1067	-1.69329	0.00024888	DOWN	-0.286095	0.669414	NC	-1.388	0.0045663	NC	FOSL_DROGR	Transcription factor kayak {ECO:0000250|UniProtKB:P21525}
cluster_contig10678	-0.806999	0.098857	NC	0.425532	0.487692	NC	-1.22362	0.0103849	DOWN	ZASP_DROME	PDZ and LIM domain protein Zasp
cluster_contig10679	-2.31234	6.08e-08	DOWN	-4.83676	8.71e-26	DOWN	2.52802	2.01e-09	UP	XP_015123421.1	PREDICTED: ribosome-binding protein 1-like [Diachasma alloeum]
cluster_contig10685	-2.88816	1.38e-05	DOWN	-3.24908	4.17e-07	DOWN	0.366681	0.678617	NC	SKEL1_DROME	Protein Skeletor, isoforms B/C
cluster_contig10691	1.18588	0.0106522	UP	1.03124	0.0432336	UP	0.167675	0.789839	NC	ALS_PAPHA	Insulin-like growth factor-binding protein complex acid labile subunit
cluster_contig10692	-0.595774	0.250979	NC	-1.47502	0.00123497	DOWN	0.886646	0.0643985	NC
cluster_contig10695	-1.4749	0.00102381	NC	0.538227	0.290049	NC	-2.00045	4.21e-06	DOWN	LIPB1_HUMAN	Liprin-beta-1
cluster_contig10697	1.94272	1.49e-05	UP	1.56405	0.000578372	UP	0.390428	0.515197	NC	FTZF1_BOMMO	Nuclear hormone receptor FTZ-F1
cluster_contig10698	4.43272	4.35e-21	UP	-0.309928	0.593664	NC	4.75502	2.38e-23	UP	CHD7_MOUSE	Chromodomain-helicase-DNA-binding protein 7
cluster_contig10701	-7.43396	5.27e-11	DOWN	-9.09259	1.08e-20	NC	1.66152	0.000746816	NC	MOT12_XENTR	Monocarboxylate transporter 12
cluster_contig10702	-0.90216	0.0682469	NC	-1.23724	0.00943993	DOWN	0.353524	0.510114	NC	CASP1_SPOFR	Caspase-1
cluster_contig10703	-1.12566	0.0100112	DOWN	-0.886525	0.0549625	NC	-0.224953	0.696775	NC	XP_015126412.1	PREDICTED: uncharacterized protein LOC107047987 [Diachasma alloeum]
cluster_contig10706	-1.63974	0.000176713	DOWN	-1.07542	0.0212166	DOWN	-0.549339	0.284561	NC	ARHG7_HUMAN	Rho guanine nucleotide exchange factor 7
cluster_contig10707	-1.71507	6.25e-05	DOWN	-0.602228	0.239221	NC	-1.09957	0.0140033	DOWN	ARHG7_HUMAN	Rho guanine nucleotide exchange factor 7
cluster_contig10709	7.94101	6.87e-14	UP	-1.9612	1.5e-05	NC	9.8158	2.5e-26	NC	BRAT_DROME	Brain tumor protein
cluster_contig1071	-0.565491	0.24253	NC	1.43558	0.000945074	UP	-1.98776	2.42e-06	DOWN	IF4B_MOUSE	Eukaryotic translation initiation factor 4B
cluster_contig10712	1.35663	0.00570852	UP	0.584757	0.250153	NC	0.778417	0.199891	NC
cluster_contig1072	-0.276518	0.636225	NC	-1.00593	0.0313495	DOWN	0.740487	0.122011	NC	ABT1_BOVIN	Activator of basal transcription 1
cluster_contig10736	-0.175139	0.776606	NC	0.858194	0.094498	NC	-1.01503	0.0374457	DOWN	ARL6_MOUSE	ADP-ribosylation factor-like protein 6
cluster_contig10740	-1.08792	0.0138699	DOWN	-0.616475	0.218277	NC	-0.453737	0.377544	NC	S30BP_HUMAN	SAP30-binding protein
cluster_contig10744	-0.0959454	0.908987	NC	-1.62322	0.000404014	DOWN	1.54065	0.000702344	UP	TRBID_DROME	Ubiquitin thioesterase trabid
cluster_contig10749	-1.4279	0.0106268	DOWN	-0.552462	0.496878	NC	-0.858488	0.140538	NC
cluster_contig10761	0.433936	0.457883	NC	2.62792	1.86e-07	UP	-2.17727	3.22e-05	NC	ZN346_XENLA	Zinc finger protein 346 {ECO:0000250|UniProtKB:Q9R0B7}
cluster_contig10767	-1.14917	0.0129465	DOWN	-0.13743	0.914153	NC	-1.00502	0.0260827	DOWN	STK26_HUMAN	Serine/threonine-protein kinase 26 {ECO:0000305}
cluster_contig10769	-0.939591	0.0820089	NC	-5.91054	1.81e-32	DOWN	4.98512	3.9e-26	NC
cluster_contig10771	0.408932	0.517279	NC	-1.21362	0.0161748	DOWN	1.63104	0.000918543	UP	MOT14_MOUSE	Monocarboxylate transporter 14
cluster_contig10774	0.342887	0.526665	NC	1.12849	0.0124658	UP	-0.780869	0.095888	NC	GPDA_DROME	Glycerol-3-phosphate dehydrogenase [NAD(+)], cytoplasmic
cluster_contig10775	-1.94192	0.000200265	DOWN	-1.432	0.0154885	NC	-0.493199	0.345123	NC	NPC2_MOUSE	Epididymal secretory protein E1
cluster_contig10776	1.04882	0.045433	UP	0.25291	0.6518	NC	0.812243	0.186606	NC	GPDA_DROPS	Glycerol-3-phosphate dehydrogenase [NAD(+)], cytoplasmic
cluster_contig10780	0	1	NC	-0.618441	0.381332	NC	1.40131	0.0289441	UP	NRF6_CAEEL	Nose resistant to fluoxetine protein 6
cluster_contig10781	-0.927546	0.105888	NC	0	1	NC	-1.10584	0.0493878	DOWN
cluster_contig10782	-1.48617	0.00153278	DOWN	1.57191	0.00206277	UP	-3.0452	2.76e-10	DOWN
cluster_contig10786	1.96724	5.58e-06	UP	0.812834	0.080258	NC	1.16438	0.0118529	UP
cluster_contig1080	-1.72845	5.01e-05	DOWN	0.245116	0.698259	NC	-1.95207	5.01e-06	DOWN	FBRL_DROER	rRNA 2'-O-methyltransferase fibrillarin
cluster_contig10804	0.0809932	0.90594	NC	1.40487	0.00294386	UP	-1.31191	0.00563173	NC	CAD87_DROME	Cadherin-87A
cluster_contig1081	-1.92781	4.54e-06	DOWN	-0.0479191	0.955151	NC	-1.87249	8.61e-06	DOWN	ARRB1_MACFA	Beta-arrestin-1
cluster_contig10816	0	1	NC	-1.48705	0.0111991	DOWN	0.319608	0.694039	NC
cluster_contig10823	-0.785912	0.0904157	NC	1.90912	1.68e-05	UP	-2.67408	1.06e-09	DOWN	MSL1_HUMAN	Male-specific lethal 1 homolog
cluster_contig10829	0.10007	0.926356	NC	-1.03922	0.0441364	DOWN	1.15129	0.0241384	UP	H1E_STRPU	Histone H1, early embryonic
cluster_contig10835	-0.3056	0.686131	NC	-1.28174	0.0126974	DOWN	0.983861	0.058702	NC	LAR_DROME	Tyrosine-protein phosphatase Lar
cluster_contig10837	-1.6555	0.00802631	DOWN	0	1	NC	-0.852551	0.107269	NC
cluster_contig10844	-0.899859	0.0456478	NC	0.782375	0.100759	NC	-1.67744	8.17e-05	DOWN
cluster_contig1085	-1.63904	0.000202626	DOWN	-1.96283	7.74e-06	DOWN	0.334022	0.542188	NC	AMCI_APIME	Chymotrypsin inhibitor
cluster_contig10858	-1.03437	0.0277412	DOWN	-0.492036	0.383028	NC	-0.529676	0.330596	NC	SHRM_DROME	Protein Shroom
cluster_contig10859	-1.93156	2.38e-05	DOWN	-0.67906	0.248172	NC	-1.25259	0.00651424	NC	TRET1_CULQU	Facilitated trehalose transporter Tret1 {ECO:0000250|UniProtKB:Q7PIR5}
cluster_contig1086	0	1	NC	-1.55337	0.00545213	DOWN	1.76782	0.00156945	NC	DHX35_HUMAN	Probable ATP-dependent RNA helicase DHX35
cluster_contig10862	-0.847001	0.0776665	NC	1.33124	0.00991388	UP	-2.16789	5.58e-06	DOWN	XP_015113656.1	PREDICTED: uncharacterized protein LOC107038860 isoform X1 [Diachasma alloeum]
cluster_contig10866	2.0607	6.43e-05	UP	0.246577	0.643212	NC	1.82652	0.00110149	UP	TAF1_DROME	Transcription initiation factor TFIID subunit 1
cluster_contig10874	1.57083	0.000370693	UP	0.594455	0.224572	NC	0.986323	0.0419246	NC	ZN608_MOUSE	Zinc finger protein 608
cluster_contig10880	9.2693	1.02e-22	UP	2.83457	5.81e-09	NC	6.3472	4.16e-06	NC	NID1_MOUSE	Nidogen-1
cluster_contig10884	-0.738453	0.14877	NC	0.6244	0.3088	NC	-1.34881	0.00590506	DOWN
cluster_contig10885	2.91569	6.77e-10	UP	0.726543	0.175275	NC	2.20329	5.54e-06	UP	ITSN2_MOUSE	Intersectin-2
cluster_contig10886	-0.361932	0.531655	NC	-1.00397	0.040829	DOWN	0.656976	0.218734	NC	RHG06_HUMAN	Rho GTPase-activating protein 6
cluster_contig10894	0.400092	0.533881	NC	-1.08035	0.028622	DOWN	1.49108	0.00219435	UP	ICA_APIME	Icarapin-like
cluster_contig10895	0.0908279	0.887729	NC	-1.25119	0.00500411	DOWN	1.34465	0.00214824	NC	XP_011306621.1	PREDICTED: uncharacterized protein LOC105268618 isoform X5 [Fopius arisanus]
cluster_contig10902	1.37687	0.0112478	NC	1.23891	0.0405996	UP	0.153094	0.852393	NC	SPRTN_RAT	SprT-like domain-containing protein Spartan
cluster_contig10903	-1.17334	0.00816081	DOWN	-0.76709	0.113784	NC	-0.398384	0.456853	NC	VIT6_OSCTI	Vitellogenin-6
cluster_contig1091	-9.90183	2.33e-27	DOWN	0	1	NC	-9.79492	7.51e-25	DOWN	AP3B2_HUMAN	AP-3 complex subunit beta-2
cluster_contig10916	-2.02864	0.000310591	DOWN	0	1	NC	-2.51831	0.000862364	NC	IF2_CHLPD	Translation initiation factor IF-2 {ECO:0000255|HAMAP-Rule:MF_00100}
cluster_contig10919	-1.25521	0.00419042	DOWN	-1.70373	7.85e-05	DOWN	0.458526	0.367658	NC	PLMN_RAT	Plasminogen
cluster_contig1092	0.238106	0.67653	NC	1.68479	8.14e-05	UP	-1.44131	0.000790457	DOWN	AP3B2_HUMAN	AP-3 complex subunit beta-2
cluster_contig10933	2.30502	1.09e-07	NC	1.74094	8.09e-05	UP	0.58137	0.264829	NC	MNB_DROME	Serine/threonine-protein kinase minibrain
cluster_contig10939	-0.116007	0.852854	NC	1.06527	0.0202765	UP	-1.16948	0.00926204	DOWN	ARI4B_MOUSE	AT-rich interactive domain-containing protein 4B
cluster_contig10940	-0.259203	0.671286	NC	1.39574	0.00495697	UP	-1.64609	0.000537067	DOWN	MARK2_RAT	Serine/threonine-protein kinase MARK2
cluster_contig10956	-1.57654	0.00034659	DOWN	-0.631345	0.220792	NC	-0.937615	0.054627	NC	GDF8_CHICK	Growth/differentiation factor 8
cluster_contig10962	-1.73227	0.00132887	DOWN	-0.574555	0.464919	NC	-1.14077	0.0416182	DOWN	DCUP_DROVI	Uroporphyrinogen decarboxylase
cluster_contig10963	-1.50102	0.0087235	DOWN	-1.48395	0.0166869	DOWN	-0.0114474	0.903714	NC	PLD3_XENLA	Phospholipase D3
cluster_contig10970	-0.44845	0.380163	NC	-1.2654	0.00442805	DOWN	0.818532	0.0812757	NC	XP_015126026.1	PREDICTED: neuropeptide-like protein 31 isoform X2 [Diachasma alloeum]
cluster_contig10974	-0.028429	0.984329	NC	-1.4584	0.00224116	DOWN	1.44361	0.00260123	UP	NLGNX_HUMAN	Neuroligin-4, X-linked
cluster_contig10977	1.51683	0.000496555	UP	-0.328651	0.563732	NC	1.8588	1.61e-05	UP	GSC1L_MOUSE	GLTSCR1-like protein
cluster_contig1098	-1.81632	0.000118941	DOWN	-2.34799	3.36e-07	DOWN	0.544135	0.290767	NC	H33_XENTR	Histone H3.3
cluster_contig10987	-1.74392	5.63e-05	DOWN	-0.790026	0.105437	NC	-0.936583	0.0456175	NC	LINES_DROME	Protein lines
cluster_contig1099	3.86107	5.16e-13	UP	0.856057	0.128858	NC	3.01495	4.25e-08	UP	KALRN_HUMAN	Kalirin
cluster_contig10997	-0.490606	0.393942	NC	0.74717	0.201829	NC	-1.23194	0.0168888	DOWN
cluster_contig11000	0	1	NC	-1.59704	0.00382486	DOWN	1.49432	0.00885344	UP	ZBED8_HUMAN	Protein ZBED8
cluster_contig11004	-1.76379	0.000125079	DOWN	-1.41838	0.00321468	DOWN	-0.340219	0.538252	NC	CTR1_SOLIN	Chymotrypsin-1
cluster_contig11006	0.964399	0.0821041	NC	-0.759509	0.126678	NC	1.73402	0.000457782	UP
cluster_contig11009	0.549492	0.343329	NC	1.46427	0.00571224	UP	-0.899842	0.125277	NC	CP6K1_BLAGE	Cytochrome P450 6k1
cluster_contig1101	0.0495281	0.943576	NC	1.0186	0.0295019	UP	-0.959782	0.0397112	NC	GEMI5_MOUSE	Gem-associated protein 5
cluster_contig11013	9.2052	2.93e-22	UP	9.21704	1.41e-20	UP	0	1	NC	CPSF3_DROME	Cleavage and polyadenylation specificity factor 73 {ECO:0000312|EMBL:AAF55578.2}
cluster_contig11017	-1.72003	5.73e-05	DOWN	-1.69906	8.47e-05	DOWN	-0.011169	0.993017	NC	PDGFB_HUMAN	Platelet-derived growth factor subunit B
cluster_contig11028	0	1	NC	-6.1969	3.65e-28	NC	4.47573	5.3e-20	UP	ZXDC_MOUSE	Zinc finger protein ZXDC
cluster_contig11037	0.231661	0.711068	NC	-1.48322	0.00165445	DOWN	1.72963	0.000166662	UP	NECAP_DROME	NECAP-like protein CG9132
cluster_contig11052	0	1	NC	-2.51064	4.58e-06	DOWN	2.05096	0.000188228	NC	PAQR3_MOUSE	Progestin and adipoQ receptor family member 3
cluster_contig11053	-0.0484697	0.952689	NC	1.08338	0.0356727	UP	-1.12108	0.0284587	DOWN	EXT3_DROME	Exostosin-3
cluster_contig11060	-7.5333	1.44e-11	DOWN	0	1	NC	-1.28633	0.129187	NC	ZDH17_HUMAN	Palmitoyltransferase ZDHHC17
cluster_contig11061	1.90212	0.000175643	UP	1.46633	0.00209298	NC	0.44876	0.644633	NC	SUR8_CULQU	Leucine-rich repeat protein soc-2 homolog
cluster_contig11065	-2.8485	3.04e-06	DOWN	0	1	NC	-1.59791	0.00746808	DOWN
cluster_contig11067	1.04029	0.0268729	UP	0.62369	0.237375	NC	0.430369	0.449546	NC	N6MT2_XENLA	N(6)-adenine-specific DNA methyltransferase 2
cluster_contig11068	-0.971882	0.0463644	NC	1.1381	0.0266324	UP	-2.10243	8.67e-06	DOWN
cluster_contig1107	1.27	0.00376042	UP	0.746083	0.114103	NC	0.52859	0.31148	NC	GOR_HUMAN	Putative exonuclease GOR
cluster_contig11080	-1.1912	0.0639912	NC	-1.54714	0.0235312	DOWN	0.369994	0.745366	NC	SBK1_DANRE	Serine/threonine-protein kinase SBK1
cluster_contig11085	-9.54637	1.2e-24	DOWN	-10.238	2.7e-29	DOWN	0.699966	0.150843	NC	SAMD1_RABIT	Atherin
cluster_contig11090	-13.0013	1.54e-52	DOWN	-12.766	4.2e-50	DOWN	-0.240569	0.668866	NC	PI3R4_RAT	Phosphoinositide 3-kinase regulatory subunit 4
cluster_contig11093	0.228	0.699082	NC	1.83406	0.000377905	UP	-1.59604	0.00239368	DOWN	LRRT2_HUMAN	Leucine-rich repeat transmembrane neuronal protein 2
cluster_contig11095	-0.860039	0.0601254	NC	0.381283	0.493517	NC	-1.22781	0.00524299	DOWN	JNK_DROME	Stress-activated protein kinase JNK
cluster_contig11099	1.19431	0.0108163	NC	1.30317	0.00703376	UP	-0.0943621	0.931671	NC	SHAN3_MOUSE	SH3 and multiple ankyrin repeat domains protein 3
cluster_contig11101	0.303575	0.594747	NC	-1.38773	0.00240771	DOWN	1.70297	0.000130513	UP
cluster_contig11108	-0.311965	0.591791	NC	-1.00985	0.0369429	DOWN	0.705418	0.168161	NC	CTRB1_LITVA	Chymotrypsin BI
cluster_contig11110	-1.49763	0.00463467	DOWN	-0.236347	0.918258	NC	-1.24903	0.0100048	DOWN	FARP1_HUMAN	FERM, RhoGEF and pleckstrin domain-containing protein 1
cluster_contig11115	-0.862955	0.133794	NC	-1.88339	0.000155486	DOWN	1.02441	0.0540652	NC	TRE12_DROSI	Facilitated trehalose transporter Tret1-2 homolog {ECO:0000250|UniProtKB:Q8MKK4}
cluster_contig11116	-2.82698	1.51e-08	NC	6.3797	2.18e-06	NC	-9.08734	5.13e-21	DOWN
cluster_contig11117	-8.26276	1.07e-15	NC	-11.3302	4.51e-38	DOWN	3.0702	5.73e-12	NC	XP_015120666.1	PREDICTED: supervillin [Diachasma alloeum]
cluster_contig11120	-1.14098	0.0172643	DOWN	-1.10953	0.0247408	DOWN	-0.0218949	0.998649	NC	CCD39_CANFA	Coiled-coil domain-containing protein 39
cluster_contig11127	-0.766948	0.14153	NC	1.85879	0.00191316	UP	-2.61416	1.83e-06	DOWN	SC5A7_TORMA	High-affinity choline transporter 1
cluster_contig11129	-1.09702	0.0137197	DOWN	-0.982637	0.0333578	NC	-0.104348	0.874509	NC	NCKX5_DANRE	Sodium/potassium/calcium exchanger 5
cluster_contig11132	-0.319642	0.566738	NC	8.99319	2.5e-27	UP	-9.25182	4.61e-30	NC	COM1_XENLA	DNA endonuclease RBBP8
cluster_contig11135	1.28572	0.00671283	UP	0.105916	0.892915	NC	1.19395	0.0130613	UP	PTK7_CHICK	Inactive tyrosine-protein kinase 7
cluster_contig11145	-0.609936	0.237749	NC	-1.38513	0.00238138	DOWN	0.786967	0.101019	NC	RBM26_MOUSE	RNA-binding protein 26
cluster_contig11146	-1.22434	0.00621959	DOWN	-1.03077	0.0270589	DOWN	-0.182478	0.778096	NC	SYYM_DROME	Tyrosine--tRNA ligase, mitochondrial
cluster_contig11150	0.56334	0.266601	NC	-1.21613	0.00755184	DOWN	1.7889	4.32e-05	UP	GCY_STRPU	Speract receptor
cluster_contig11156	-2.68874	2.84e-10	NC	-1.10306	0.0153163	DOWN	-1.5879	0.000195503	NC	BRC1_DROME	Broad-complex core protein isoforms 1/2/3/4/5
cluster_contig11157	-1.99737	4.1e-06	NC	-0.774237	0.138671	NC	-1.21635	0.00531162	DOWN	WDR48_PONAB	WD repeat-containing protein 48
cluster_contig11160	-0.619412	0.222408	NC	0.436308	0.450162	NC	-1.04265	0.0281789	DOWN	CNOT2_HUMAN	CCR4-NOT transcription complex subunit 2
cluster_contig11163	-0.353875	0.500067	NC	0.757232	0.113639	NC	-1.0932	0.013779	DOWN	ANR17_MOUSE	Ankyrin repeat domain-containing protein 17
cluster_contig11166	0	1	NC	-3.00609	5.33e-06	DOWN	2.6301	4.95e-05	UP	WHITE_CERCA	Protein white
cluster_contig1117	9.83003	6.97e-27	UP	0.958089	0.0577085	NC	8.78577	5.94e-19	UP	NCOR1_MOUSE	Nuclear receptor corepressor 1
cluster_contig11170	1.69881	0.00362919	UP	-0.0165968	0.966394	NC	0	1	NC	TLL1_DANRE	Dorsal-ventral patterning tolloid-like protein 1
cluster_contig11174	6.67593	9.99e-08	NC	-1.53138	0.00571224	NC	8.11584	2.06e-14	UP	CU025_HUMAN	C2 domain-containing protein 2
cluster_contig11176	-0.807738	0.145642	NC	-2.48783	6.96e-08	NC	1.69518	0.000137516	UP	CBP_HUMAN	CREB-binding protein
cluster_contig1118	0.969896	0.0358945	NC	-0.391451	0.472803	NC	1.37975	0.00189801	UP
cluster_contig1119	-0.89934	0.0536682	NC	-1.18448	0.00971923	DOWN	0.300926	0.608894	NC	GUN4_THEFU	Endoglucanase E-4
cluster_contig11190	1.02502	0.0206085	UP	-0.131515	0.846841	NC	1.16352	0.00803204	UP	EDC4_DANRE	Enhancer of mRNA-decapping protein 4
cluster_contig11191	1.36902	0.00640929	NC	-1.17812	0.0126223	DOWN	2.55086	6.04e-08	NC	EDC4_DANRE	Enhancer of mRNA-decapping protein 4
cluster_contig11194	2.98891	2.06e-10	UP	0.823202	0.0962806	NC	2.18067	5.6e-06	UP	MAST3_XENLA	Microtubule-associated serine/threonine-protein kinase 3
cluster_contig11202	1.19883	0.0181679	UP	-0.631076	0.235235	NC	1.84343	0.000119011	UP	AN13D_MOUSE	Ankyrin repeat domain-containing protein 13D
cluster_contig11207	-3.48432	3.04e-11	DOWN	0	1	NC	-1.78261	0.00232203	NC	SMO_DROME	Protein smoothened
cluster_contig1121	1.24516	0.00537243	UP	0.0855778	0.915222	NC	1.17074	0.0100597	UP	DJC13_HUMAN	DnaJ homolog subfamily C member 13
cluster_contig11216	0	1	NC	-1.17215	0.0783625	NC	1.36721	0.0332123	UP	SLTM_MOUSE	SAFB-like transcription modulator
cluster_contig1122	-1.36237	0.00169266	DOWN	0.953556	0.0444392	NC	-2.30596	8.6e-08	DOWN	LUCI_LUCMI	Luciferin 4-monooxygenase
cluster_contig11220	-1.53483	0.00495839	DOWN	-1.35267	0.0196654	DOWN	-0.175532	0.818873	NC	CU20_TENMO	Adult-specific cuticular protein ACP-20
cluster_contig11222	-1.41913	0.00224171	NC	8.23461	4.1e-14	NC	-9.53508	6.47e-23	DOWN	CHSS1_MOUSE	Chondroitin sulfate synthase 1
cluster_contig11223	0.969267	0.0361237	NC	1.04109	0.0241843	UP	-0.0639018	0.926287	NC	FRMD5_MOUSE	FERM domain-containing protein 5
cluster_contig11230	-0.138957	0.82011	NC	3.05223	3e-12	UP	-3.18456	3.35e-13	DOWN	HTS_DROME	Protein hu-li tai shao
cluster_contig11235	-0.82278	0.0753846	NC	-1.13814	0.0114694	DOWN	0.325327	0.54981	NC	PPAP_BOVIN	Prostatic acid phosphatase
cluster_contig11240	1.73282	4.96e-05	UP	0.62349	0.209001	NC	1.11981	0.0124524	UP	DGKQ_MOUSE	Diacylglycerol kinase theta
cluster_contig11241	9.29858	6.08e-23	NC	0.77655	0.166133	NC	8.43575	1.14e-16	UP	S12A4_MOUSE	Solute carrier family 12 member 4
cluster_contig11252	-0.398263	0.562619	NC	-1.24346	0.0167518	DOWN	0.85623	0.108279	NC	RPGR_CANFA	X-linked retinitis pigmentosa GTPase regulator
cluster_contig1126	-1.36877	0.00141235	DOWN	-0.100864	0.887512	NC	-1.26246	0.003606	DOWN	ACAC_CHICK	Acetyl-CoA carboxylase
cluster_contig11263	-0.406884	0.456456	NC	0.775046	0.176081	NC	-1.16291	0.0223792	DOWN	HCN4_HUMAN	Potassium/sodium hyperpolarization-activated cyclic nucleotide-gated channel 4
cluster_contig11264	1.38863	0.00196582	UP	1.14765	0.0123637	UP	0.246271	0.70707	NC	DCAF6_PONAB	DDB1- and CUL4-associated factor 6
cluster_contig11268	-0.718811	0.151082	NC	0.704886	0.228902	NC	-1.41263	0.0037901	DOWN	LSD1_DROME	Lipid storage droplets surface-binding protein 1
cluster_contig11269	-0.442264	0.395211	NC	-1.18785	0.00875531	DOWN	0.753752	0.115992	NC	SRSF7_HUMAN	Serine/arginine-rich splicing factor 7
cluster_contig11272	-7.30304	2.7e-10	DOWN	0	1	NC	-1.53026	0.0109502	NC	SRSF7_HUMAN	Serine/arginine-rich splicing factor 7
cluster_contig11295	-0.89192	0.0522999	NC	-1.23202	0.00607271	DOWN	0.34794	0.525638	NC	BL1S1_PONAB	Biogenesis of lysosome-related organelles complex 1 subunit 1
cluster_contig11297	-0.930538	0.0381142	NC	0.783374	0.101308	NC	-1.70916	6.15e-05	DOWN
cluster_contig113	-0.256621	0.642639	NC	-2.30422	4.6e-08	DOWN	2.06444	8.47e-07	UP	ART2_YEAST	Putative uncharacterized protein ART2
cluster_contig11304	-1.16325	0.00996241	DOWN	-2.93967	1.27e-11	NC	1.79764	2.6e-05	NC	ANXB9_DROME	Annexin B9
cluster_contig11308	-1.26851	0.00699101	DOWN	-2.06179	4.77e-06	DOWN	0.801737	0.0957256	NC	XP_015121914.1	PREDICTED: uncharacterized protein LOC107044517 isoform X1 [Diachasma alloeum]
cluster_contig11319	-1.92972	6.05e-06	NC	9.71431	3.72e-24	NC	-11.5258	1.72e-38	DOWN	GOLP3_DROME	Golgi phosphoprotein 3 homolog rotini
cluster_contig11321	-1.52651	0.00192335	DOWN	-1.90323	9.65e-05	DOWN	0.386899	0.522892	NC
cluster_contig11324	-2.67522	7.19e-09	DOWN	-2.08479	1.51e-05	DOWN	-0.581936	0.239196	NC	RIOK2_HUMAN	Serine/threonine-protein kinase RIO2
cluster_contig11329	-7.74128	1.25e-12	DOWN	-8.37273	6.55e-16	NC	0.639055	0.204351	NC	KAPR2_DROME	cAMP-dependent protein kinase type II regulatory subunit
cluster_contig11330	-1.52771	0.00112024	DOWN	0.905061	0.157423	NC	-2.41614	1.07e-06	DOWN	CHSS1_MOUSE	Chondroitin sulfate synthase 1
cluster_contig11331	-0.415446	0.416747	NC	-1.5899	0.000206709	DOWN	1.18092	0.00690642	UP	MRJP1_APIME	Major royal jelly protein 1
cluster_contig11333	-0.569372	0.294198	NC	8.68049	6.83e-17	UP	-9.13955	2.06e-21	DOWN	SO4C1_MOUSE	Solute carrier organic anion transporter family member 4C1
cluster_contig1134	-7.97283	5.53e-14	DOWN	0	1	NC	-2.27618	2.66e-05	DOWN	NINJ2_MOUSE	Ninjurin-2
cluster_contig11340	12.291	2.72e-45	UP	1.29057	0.0038824	UP	10.9146	6.85e-35	UP	PTEN_MOUSE	Phosphatidylinositol 3,4,5-trisphosphate 3-phosphatase and dual-specificity protein phosphatase PTEN
cluster_contig11341	0	1	NC	-9.21852	1.09e-21	DOWN	9.11261	3.62e-21	UP	RBP2A_PLAF7	Reticulocyte-binding protein 2 homolog a {ECO:0000312|EMBL:CAD52492.1}
cluster_contig11342	-10.4812	7.08e-32	DOWN	-7.40817	2.4e-10	NC	-3.0706	1.28e-11	NC	PTEN_MOUSE	Phosphatidylinositol 3,4,5-trisphosphate 3-phosphatase and dual-specificity protein phosphatase PTEN
cluster_contig11346	-2.50001	5.57e-09	DOWN	-1.69192	0.000112365	DOWN	-0.795264	0.0926971	NC	ZN363_HUMAN	RING finger and CHY zinc finger domain-containing protein 1
cluster_contig11349	-0.979547	0.0339948	NC	0.127996	0.874739	NC	-1.09978	0.0183973	DOWN	MMSA_ANOGA	Probable methylmalonate-semialdehyde dehydrogenase [acylating], mitochondrial
cluster_contig11351	-8.85242	1.21e-19	DOWN	-7.71152	6.24e-12	NC	-1.1317	0.0178636	NC	SFXN2_MOUSE	Sideroflexin-2
cluster_contig11357	-1.04532	0.0192397	DOWN	-0.00773801	0.9912	NC	-1.02682	0.0245287	DOWN	Y2138_DROME	Formin-like protein CG32138
cluster_contig11365	-3.66928	5.47e-16	NC	-2.19338	1.39e-06	DOWN	-1.46102	0.000760732	NC	460R_IIV6	Uncharacterized protein 460R
cluster_contig11367	0.576834	0.316053	NC	-0.896538	0.0981195	NC	1.48409	0.00253602	UP	PRDM4_HUMAN	PR domain zinc finger protein 4
cluster_contig11370	-1.20396	0.00672982	NC	0.646864	0.212959	NC	-1.83939	2.5e-05	DOWN	DUS2L_HUMAN	tRNA-dihydrouridine(20) synthase [NAD(P)+]-like
cluster_contig11376	-1.02588	0.0201314	DOWN	-0.694306	0.150666	NC	-0.317816	0.558905	NC	BNIP3_HUMAN	BCL2/adenovirus E1B 19 kDa protein-interacting protein 3
cluster_contig11377	-1.04645	0.0390008	DOWN	-0.436498	0.454346	NC	-0.59416	0.380653	NC	TF3C1_HUMAN	General transcription factor 3C polypeptide 1
cluster_contig11382	-2.82831	6.78e-11	DOWN	-2.61304	1.8e-09	NC	-0.191963	0.764745	NC	ABCAD_MOUSE	ATP-binding cassette sub-family A member 13
cluster_contig11383	-1.3738	0.00293027	DOWN	-0.159564	0.899606	NC	-1.20158	0.00703229	DOWN	MED4_ANOGA	Mediator of RNA polymerase II transcription subunit 4
cluster_contig11384	-1.2003	0.00599615	DOWN	-0.358506	0.520021	NC	-0.823821	0.0772238	NC	MED4_ANOGA	Mediator of RNA polymerase II transcription subunit 4
cluster_contig1139	-0.819556	0.12279	NC	1.65978	0.00676008	UP	-2.46975	1.12e-05	DOWN
cluster_contig11393	-0.67749	0.172707	NC	-1.37613	0.00219718	DOWN	0.718462	0.132846	NC	XP_011304901.1	PREDICTED: uncharacterized protein LOC105267618 [Fopius arisanus]
cluster_contig11398	-0.600769	0.217747	NC	1.28477	0.00680317	UP	-1.87951	2.68e-05	DOWN	NPL_MOUSE	N-acetylneuraminate lyase
cluster_contig11409	-3.09201	6.25e-10	DOWN	-0.83903	0.267771	NC	-2.24125	2.17e-06	NC	K1109_HUMAN	Uncharacterized protein KIAA1109
cluster_contig1141	0.521797	0.326265	NC	2.41423	1.36e-07	UP	-1.88197	4.92e-05	DOWN	KI10A_DROME	Kinesin-like protein Klp10A
cluster_contig11421	1.15037	0.0228516	UP	2.29198	2.89e-06	UP	0	1	NC	NDRG3_PONAB	Protein NDRG3
cluster_contig11422	-12.7967	7.29e-51	DOWN	-11.5224	1.18e-39	NC	-1.29058	0.00276834	NC	XP_015114358.1	PREDICTED: uncharacterized protein LOC107039315 [Diachasma alloeum]
cluster_contig11424	-1.99582	0.000344654	DOWN	0	1	NC	-3.05307	1.66e-05	NC
cluster_contig11429	-1.09125	0.0475291	DOWN	-2.48596	3.04e-07	DOWN	1.41225	0.00271097	UP	SC6A1_HUMAN	Sodium- and chloride-dependent GABA transporter 1
cluster_contig1143	1.95457	7.06e-06	NC	-1.21671	0.00625426	DOWN	3.18942	3.81e-13	NC	SMG1_HUMAN	Serine/threonine-protein kinase SMG1
cluster_contig11448	1.722	7.65e-05	UP	0.580042	0.257265	NC	1.15149	0.0120913	UP	SH319_HUMAN	SH3 domain-containing protein 19
cluster_contig11457	-0.565032	0.395368	NC	-1.42593	0.00631056	DOWN	0.870751	0.112243	NC
cluster_contig11458	0	1	NC	-1.93067	0.000861349	DOWN	3.01386	4.86e-07	NC
cluster_contig11463	1.28228	0.00397499	UP	-0.433217	0.427836	NC	1.72282	7.81e-05	UP	CSKP_DROME	Peripheral plasma membrane protein CASK
cluster_contig11468	1.50377	0.00423194	UP	0.503128	0.424726	NC	1.01136	0.0864771	NC	HMCN2_HUMAN	Hemicentin-2
cluster_contig11469	2.46307	2.32e-07	UP	0.327167	0.641687	NC	2.14919	1.03e-05	UP	PPME1_MOUSE	Protein phosphatase methylesterase 1
cluster_contig11487	1.73443	5.48e-05	UP	-0.246789	0.682892	NC	1.98922	3.42e-06	UP	CSDE1_RAT	Cold shock domain-containing protein E1
cluster_contig11491	0.851945	0.0918386	NC	-0.432057	0.45937	NC	1.29373	0.00710395	UP	GRM_DROME	Metabotropic glutamate receptor
cluster_contig11495	-1.14329	0.0101002	DOWN	-1.79876	3e-05	DOWN	0.660399	0.168846	NC	CHS8_USTMA	Chitin synthase 8
cluster_contig11496	-1.23411	0.00449774	DOWN	-0.832325	0.0761084	NC	-0.391078	0.459233	NC	CBPD_DROME	Carboxypeptidase D
cluster_contig115	0.108476	0.869276	NC	-1.26286	0.00495049	DOWN	1.38398	0.00169983	UP	BL1S1_PONAB	Biogenesis of lysosome-related organelles complex 1 subunit 1
cluster_contig11507	-1.54473	0.000424382	DOWN	-0.891631	0.0666614	NC	-0.639245	0.190653	NC	ECI1_MOUSE	Enoyl-CoA delta isomerase 1, mitochondrial
cluster_contig11508	-0.43621	0.424831	NC	-1.05395	0.0373449	DOWN	0.623254	0.27401	NC	TPH1_CHICK	Tryptophan 5-hydroxylase 1
cluster_contig11515	0.701998	0.140255	NC	1.17684	0.00865013	UP	-0.46032	0.371071	NC	MBL_DROME	Protein muscleblind
cluster_contig11527	-1.82893	0.00312436	DOWN	0	1	NC	-2.02264	0.000665956	DOWN
cluster_contig11530	-1.5158	0.0121138	DOWN	0	1	NC	-0.00200464	0.902356	NC	GBX2_MOUSE	Homeobox protein GBX-2
cluster_contig11535	-1.41245	0.000931107	DOWN	-2.06907	9.39e-07	DOWN	0.658919	0.165158	NC	LRC15_MOUSE	Leucine-rich repeat-containing protein 15
cluster_contig11548	-2.34343	1.28e-07	DOWN	-2.72808	1.03e-09	DOWN	0.393373	0.475542	NC	SH3K1_HUMAN	SH3 domain-containing kinase-binding protein 1
cluster_contig1156	-1.40736	0.00578939	DOWN	-1.67508	0.000913238	NC	0.285669	0.664191	NC
cluster_contig1157	-8.91582	4.22e-20	DOWN	0	1	NC	-8.81817	3.43e-19	DOWN	ANM3_HUMAN	Protein arginine N-methyltransferase 3
cluster_contig11574	0.795931	0.159712	NC	-0.696158	0.21107	NC	1.49578	0.00323908	UP	TXN4A_MOUSE	Thioredoxin-like protein 4A
cluster_contig11579	-1.47722	0.00426123	DOWN	-0.896835	0.137298	NC	-0.568633	0.33947	NC	SMC6_XENLA	Structural maintenance of chromosomes protein 6
cluster_contig11580	-1.01206	0.0241127	DOWN	0.153057	0.826816	NC	-1.14987	0.0102954	DOWN	OGG1_MOUSE	N-glycosylase/DNA lyase
cluster_contig11586	0.00322264	0.994498	NC	-1.88438	3.12e-05	DOWN	1.89685	1.99e-05	UP	NDRG3_HUMAN	Protein NDRG3
cluster_contig11594	2.12474	0.0008499	UP	0.380848	0.638075	NC	0	1	NC	KCNQ1_SQUAC	Potassium voltage-gated channel subfamily KQT member 1
cluster_contig11595	-1.42576	0.00102251	DOWN	-0.118455	0.874754	NC	-1.30039	0.00296765	DOWN	WAP1_PHIOL	Waprin-Phi1
cluster_contig11605	1.31649	0.00252202	UP	0.987831	0.0302614	NC	0.33748	0.545749	NC	UBA5_BOMMO	Ubiquitin-like modifier-activating enzyme 5
cluster_contig11608	-1.07377	0.0243269	DOWN	-0.673691	0.215498	NC	-0.390378	0.506399	NC	TRET1_POLVA	Facilitated trehalose transporter Tret1 {ECO:0000303|PubMed:17606922, ECO:0000312|EMBL:BAF63703.1}
cluster_contig11613	-8.07679	1.31e-14	DOWN	0	1	NC	-7.9695	8.83e-14	DOWN	DAPK3_HUMAN	Death-associated protein kinase 3
cluster_contig11619	0.730765	0.237674	NC	-0.574096	0.351789	NC	1.31682	0.0142891	UP	LOLA3_DROME	Longitudinals lacking protein, isoforms A/B/D/L
cluster_contig1162	-1.43362	0.00355208	DOWN	-0.994973	0.0870603	NC	-0.429916	0.398471	NC	PUR4_DROME	Phosphoribosylformylglycinamidine synthase
cluster_contig11624	-2.12748	3.69e-06	DOWN	-0.484694	0.428506	NC	-1.63148	0.000624067	DOWN	SO2B1_MOUSE	Solute carrier organic anion transporter family member 2B1
cluster_contig11626	-0.423525	0.405419	NC	0.675611	0.170749	NC	-1.07986	0.0155111	DOWN	ARF2_DROME	ADP-ribosylation factor 2
cluster_contig11628	-1.39207	0.00128171	DOWN	-0.59801	0.236777	NC	-0.782805	0.094549	NC	PPM1E_MOUSE	Protein phosphatase 1E
cluster_contig11631	1.55777	0.00106718	UP	-0.744973	0.145983	NC	2.31414	5.19e-07	UP	STNB_DROME	Protein stoned-B
cluster_contig11633	1.33837	0.0138763	UP	-0.446397	0.482411	NC	1.79461	0.000764654	UP	GABR2_HUMAN	Gamma-aminobutyric acid type B receptor subunit 2
cluster_contig1164	-1.27211	0.00466639	DOWN	-1.20792	0.00872108	DOWN	-0.0576134	0.941758	NC	FACR1_DROME	Putative fatty acyl-CoA reductase CG5065 {ECO:0000250|UniProtKB:Q922J9, ECO:0000312|EMBL:AAF57974.1}
cluster_contig11640	-0.470359	0.349324	NC	1.01968	0.0266324	UP	-1.47949	0.00065493	DOWN	PEX1_HUMAN	Peroxisome biogenesis factor 1
cluster_contig11649	-0.832048	0.0735689	NC	1.39689	0.00183547	UP	-2.21777	2.81e-07	DOWN	FMR1_DROME	Fragile X mental retardation syndrome-related protein 1
cluster_contig1166	-0.718587	0.221371	NC	0	1	NC	-1.92466	0.00101867	DOWN	PRS27_RAT	Serine protease 27
cluster_contig11665	-1.28151	0.0111664	DOWN	-1.02627	0.0555541	NC	-0.24138	0.731121	NC	TMM43_DROME	Transmembrane protein 43 homolog
cluster_contig11666	0.876089	0.0632561	NC	1.20983	0.00791426	UP	-0.319573	0.57448	NC	FAS3_DROME	Fasciclin-3
cluster_contig11668	-1.9118	7.33e-06	DOWN	-0.0734281	0.947933	NC	-1.83203	1.46e-05	DOWN	FAS3_DROME	Fasciclin-3
cluster_contig11672	1.15281	0.008838	UP	0.156624	0.809937	NC	1.00042	0.0272118	UP	XP_015118511.1	PREDICTED: uncharacterized protein LOC107042131 isoform X1 [Diachasma alloeum] &gt;XP_015118512.1 PREDICTED: uncharacterized protein LOC107042131 isoform X1 [Diachasma alloeum]
cluster_contig11674	3.17188	2.93e-12	UP	1.72777	6.23e-05	NC	1.4638	0.00291699	NC	XP_015118514.1	PREDICTED: uncharacterized protein LOC107042131 isoform X3 [Diachasma alloeum]
cluster_contig1168	-1.10925	0.0327949	DOWN	-1.23864	0.0177842	DOWN	0.139499	0.864769	NC
cluster_contig11690	-0.926224	0.063722	NC	-1.32789	0.00530051	DOWN	0.407775	0.469681	NC	TRIM2_BOVIN	Tripartite motif-containing protein 2
cluster_contig11696	-2.44201	6e-05	DOWN	0	1	NC	0.419334	0.476263	NC	LSD2_DROME	Lipid storage droplets surface-binding protein 2
cluster_contig11699	-0.91561	0.0494467	NC	1.6011	0.00100102	UP	-2.49643	5.77e-08	DOWN	MAGI1_MOUSE	Membrane-associated guanylate kinase, WW and PDZ domain-containing protein 1
cluster_contig11703	0.829168	0.136868	NC	1.4009	0.00994715	UP	0	1	NC
cluster_contig11713	-12.9227	6.39e-52	DOWN	-8.02582	8.28e-14	NC	-4.89244	1.58e-25	NC	GAK_HUMAN	Cyclin-G-associated kinase
cluster_contig11718	-0.432853	0.398735	NC	0.690813	0.155893	NC	-1.10984	0.0123996	DOWN	FBX33_HUMAN	F-box only protein 33
cluster_contig11727	-0.121299	0.86377	NC	-1.21426	0.0137841	DOWN	1.10469	0.028278	UP	COMD2_HUMAN	COMM domain-containing protein 2
cluster_contig11730	0.740808	0.255443	NC	1.26333	0.0191492	UP	0	1	NC
cluster_contig11734	-2.05853	0.000272811	DOWN	-1.50177	0.0311942	DOWN	-0.548351	0.298951	NC
cluster_contig11737	0.510818	0.358935	NC	-1.37707	0.00382438	DOWN	1.90307	3.8e-05	NC
cluster_contig11739	-2.84102	1.92e-08	DOWN	0	1	NC	-3.44193	1.05e-10	NC
cluster_contig11742	0.460063	0.374146	NC	-0.820827	0.0882765	NC	1.29198	0.00364828	UP
cluster_contig11743	-0.874037	0.123469	NC	0.475973	0.566722	NC	-1.33899	0.0181669	DOWN	HERC4_MOUSE	Probable E3 ubiquitin-protein ligase HERC4
cluster_contig11745	-1.98764	4.12e-06	DOWN	-1.90901	1.21e-05	DOWN	-0.0681616	0.925028	NC	FACR1_DROME	Putative fatty acyl-CoA reductase CG5065 {ECO:0000250|UniProtKB:Q922J9, ECO:0000312|EMBL:AAF57974.1}
cluster_contig11748	-1.18134	0.0385952	DOWN	0	1	NC	-2.78836	8.18e-05	DOWN	DCNL1_MOUSE	DCN1-like protein 1
cluster_contig11753	-0.0947983	0.921965	NC	-2.36321	4.76e-07	NC	2.27612	1.7e-06	UP	CI016_BOVIN	UPF0184 protein C9orf16 homolog
cluster_contig11763	1.0627	0.0210953	UP	4.65731	1.67e-19	NC	-3.58261	6.24e-12	NC	LIPR2_MYOCO	Pancreatic lipase-related protein 2
cluster_contig11767	-1.9742	3.7e-06	DOWN	-0.808136	0.0943548	NC	-1.15654	0.00927229	DOWN	XP_015114898.1	PREDICTED: uncharacterized protein LOC107039661 isoform X2 [Diachasma alloeum]
cluster_contig11769	2.11491	3.5e-06	UP	1.05277	0.0254656	UP	1.06854	0.0370723	UP	DLG1_DROME	Disks large 1 tumor suppressor protein
cluster_contig11774	1.06569	0.0182581	UP	0.238185	0.700937	NC	0.837872	0.0768358	NC	HD_MOUSE	Huntingtin
cluster_contig11777	-1.69956	6.26e-05	DOWN	-1.64902	0.000122835	DOWN	-0.0311815	0.969292	NC	PGSC2_DROSI	Peptidoglycan-recognition protein SC2
cluster_contig1178	-7.29722	2.05e-10	DOWN	-8.148	1.61e-14	NC	0.841876	0.185127	NC	WRIP1_MOUSE	ATPase WRNIP1
cluster_contig11792	0	1	NC	-1.98811	7.57e-05	DOWN	3.35788	3.6e-09	NC	SSBP3_CHICK	Single-stranded DNA-binding protein 3
cluster_contig11808	-1.39427	0.00355099	DOWN	-1.51093	0.00158724	DOWN	0.125901	0.83839	NC	YH24_CAEEL	Putative aminopeptidase W07G4.4
cluster_contig11810	-0.326109	0.55836	NC	-1.22767	0.00629592	DOWN	0.915301	0.0475208	NC	RM24_DROME	Probable 39S ribosomal protein L24, mitochondrial
cluster_contig11817	0.662895	0.172323	NC	1.07416	0.023267	UP	-0.390936	0.495562	NC	GALK2_RAT	N-acetylgalactosamine kinase
cluster_contig1182	1.05028	0.0192859	UP	0.452019	0.407803	NC	0.615589	0.211496	NC	SO3A1_RAT	Solute carrier organic anion transporter family member 3A1
cluster_contig11822	-1.06993	0.0505078	NC	0.560706	0.287181	NC	-1.62355	0.000769393	DOWN	GAS8_HUMAN	Growth arrest-specific protein 8
cluster_contig11824	7.6741	1.59e-12	UP	-2.35274	7.38e-07	DOWN	9.92885	4.27e-27	UP	MRP9_MOUSE	Multidrug resistance-associated protein 9
cluster_contig11828	-1.0174	0.0784123	NC	-1.15987	0.0467518	DOWN	0.150752	0.872133	NC
cluster_contig11846	0.998316	0.0256695	NC	-0.210206	0.740543	NC	1.2211	0.00552704	UP	DYRK2_DROME	Dual specificity tyrosine-phosphorylation-regulated kinase 2
cluster_contig11849	1.22466	0.0406671	UP	-0.276791	0.766303	NC	1.51074	0.0133444	UP
cluster_contig11859	-8.41993	9.07e-17	DOWN	0	1	NC	-4.03405	6.61e-11	NC	LOLA2_DROME	Longitudinals lacking protein, isoforms H/M/V
cluster_contig1186	-1.27719	0.0208975	DOWN	-2.35231	2.68e-06	DOWN	1.08824	0.0298067	UP	SV2B_MOUSE	Synaptic vesicle glycoprotein 2B
cluster_contig1187	0	1	NC	-2.26627	7.39e-05	DOWN	7.89964	2.08e-13	UP	NOX5_HUMAN	NADPH oxidase 5
cluster_contig11871	9.38721	1.48e-23	UP	9.39929	8.05e-22	UP	0	1	NC	FABD_DROME	Probable malonyl-CoA-acyl carrier protein transacylase, mitochondrial
cluster_contig11872	-2.06732	9.31e-06	DOWN	-1.76183	0.000301128	DOWN	-0.293399	0.593904	NC	GBB5_MOUSE	Guanine nucleotide-binding protein subunit beta-5
cluster_contig11873	-1.16965	0.0128594	DOWN	0.0816834	0.898438	NC	-1.23899	0.00740373	DOWN
cluster_contig11879	0.299683	0.702729	NC	-1.01797	0.0636224	NC	1.32578	0.0126662	UP
cluster_contig11894	-0.624338	0.198177	NC	-1.46923	0.000789298	DOWN	0.853534	0.0649788	NC	YC91_CAEEL	Uncharacterized MFS-type transporter C09D4.1
cluster_contig11898	-1.84031	0.000484608	DOWN	0	1	NC	-2.41737	3.87e-05	DOWN	M3K7_BOVIN	Mitogen-activated protein kinase kinase kinase 7
cluster_contig1190	-0.861825	0.0632584	NC	-1.64818	0.000151613	DOWN	0.799305	0.0899176	NC	ACBD5_XENLA	Acyl-CoA-binding domain-containing protein 5
cluster_contig11900	0.4887	0.36415	NC	3.29543	1.43e-08	NC	-2.79494	4.59e-06	DOWN	IYD1_PONAB	Iodotyrosine dehalogenase 1
cluster_contig11908	-1.21604	0.00576649	DOWN	0.166842	0.776757	NC	-1.37748	0.00134949	DOWN	VGFR1_HUMAN	Vascular endothelial growth factor receptor 1
cluster_contig11913	-2.41759	2.83e-07	NC	1.20189	0.0358636	NC	-3.6033	1.06e-12	DOWN	NTP1_MSEPV	Nucleoside triphosphatase I
cluster_contig11916	-1.68025	0.000147968	DOWN	-0.519171	0.37555	NC	-1.14545	0.0104612	DOWN	ABCGK_DICDI	ABC transporter G family member 20
cluster_contig11918	1.47268	0.00715089	UP	0.191779	0.811568	NC	1.29351	0.0294862	UP
cluster_contig11924	0.443062	0.380008	NC	9.92331	3.23e-56	UP	-9.46479	6.43e-52	DOWN	NAA11_MOUSE	N-alpha-acetyltransferase 11
cluster_contig11928	-1.22431	0.00614874	DOWN	0.930929	0.055943	NC	-2.14431	9.51e-07	DOWN	ACOX1_DROME	Probable peroxisomal acyl-coenzyme A oxidase 1
cluster_contig11938	-0.166833	0.77972	NC	-1.37646	0.0016053	DOWN	1.22065	0.00525143	UP	NETR_MOUSE	Neurotrypsin
cluster_contig11951	1.48448	0.000611177	UP	0.702973	0.147693	NC	0.793251	0.0954648	NC	HUNB_BOMMO	Protein hunchback
cluster_contig11959	-2.90951	1.8e-08	DOWN	-3.26306	1.95e-10	NC	0.372348	0.533591	NC	VF201_IIV6	Putative Bro-N domain-containing protein 201R
cluster_contig11970	-0.830491	0.118633	NC	-1.17045	0.0215175	DOWN	0.355175	0.559478	NC	XPO6_HUMAN	Exportin-6
cluster_contig11971	-0.096972	0.894086	NC	1.42595	0.00277568	UP	-1.51287	0.00141483	DOWN	MFSD1_MOUSE	Major facilitator superfamily domain-containing protein 1
cluster_contig11972	-1.71037	6.16e-05	DOWN	-1.57115	0.000291755	DOWN	-0.126548	0.843024	NC	AL7A1_BOVIN	Alpha-aminoadipic semialdehyde dehydrogenase
cluster_contig11975	-1.07215	0.0212208	DOWN	-1.19554	0.00997889	DOWN	0.140417	0.797044	NC	GAP2_DROME	Probable Ras GTPase-activating protein
cluster_contig11978	-0.74949	0.219567	NC	-1.62173	0.0018506	DOWN	0.887982	0.105489	NC
cluster_contig11986	-1.80166	2.25e-05	NC	-0.445988	0.409029	NC	-1.34933	0.00199117	DOWN
cluster_contig12	0.206172	0.759698	NC	-1.1899	0.0094995	NC	1.39673	0.00214099	UP	MIB1_HUMAN	E3 ubiquitin-protein ligase MIB1
cluster_contig12003	-4.20149	3.27e-20	NC	1.25933	0.0266324	NC	-5.4559	1.5e-27	DOWN	HCD2_DROME	3-hydroxyacyl-CoA dehydrogenase type-2
cluster_contig12019	-6.2036	2.32e-26	DOWN	0	1	NC	-5.77384	6.4e-24	DOWN	CDO66793.1	conserved Plasmodium protein, unknown function [Plasmodium reichenowi]
cluster_contig12022	-1.60527	0.00320823	DOWN	-1.69452	0.00174297	DOWN	0.102096	0.874815	NC	SYCC_DROPS	Cysteine--tRNA ligase, cytoplasmic
cluster_contig12023	0.0231227	0.975575	NC	-1.23394	0.033715	NC	1.26431	0.0212368	UP	ARSJ_HUMAN	Arylsulfatase J
cluster_contig12046	-0.722529	0.119574	NC	1.03328	0.0228053	UP	-1.74104	4.13e-05	DOWN	BLMH_CHICK	Bleomycin hydrolase
cluster_contig12047	0	1	NC	-1.59677	0.0141622	NC	2.84981	2.22e-05	UP
cluster_contig12057	-0.819306	0.0724255	NC	0.532486	0.298735	NC	-1.3422	0.00188131	DOWN	RAB14_PONAB	Ras-related protein Rab-14
cluster_contig12065	1.06449	0.0158818	NC	2.36758	4.82e-08	UP	-1.28595	0.00451696	NC	CHIA_RAT	Acidic mammalian chitinase
cluster_contig12066	1.50523	0.000424429	UP	2.04182	1.98e-06	UP	-0.52236	0.312665	NC	CHIA_RAT	Acidic mammalian chitinase
cluster_contig1207	0.752355	0.14216	NC	-0.253171	0.669631	NC	1.02093	0.034364	UP	ANAG_HUMAN	Alpha-N-acetylglucosaminidase
cluster_contig12075	1.41072	0.00151815	NC	1.22882	0.00707292	UP	0.178964	0.795593	NC	WEE1_RAT	Wee1-like protein kinase
cluster_contig12086	-1.30757	0.00255521	DOWN	-0.53548	0.296563	NC	-0.758425	0.110044	NC	FMR1_DROME	Fragile X mental retardation syndrome-related protein 1
cluster_contig12087	1.48966	0.000583347	UP	0.95288	0.037952	NC	0.552122	0.280614	NC	XP_011313445.1	PREDICTED: uncharacterized protein LOC105272909 [Fopius arisanus]
cluster_contig12088	-0.9929	0.0449895	NC	0.0679535	0.991692	NC	-1.04558	0.0493193	DOWN	HYKK_XENLA	Hydroxylysine kinase
cluster_contig1209	-1.77414	0.000120155	NC	0.230906	0.78643	NC	-1.98801	2.62e-05	DOWN	APOP1_BOVIN	Apoptogenic protein 1, mitochondrial
cluster_contig12094	-0.55928	0.25162	NC	0.519257	0.318182	NC	-1.06836	0.0167417	DOWN	UBA5_BOMMO	Ubiquitin-like modifier-activating enzyme 5
cluster_contig12095	-2.38255	2.07e-08	DOWN	-0.796043	0.0983993	NC	-1.57616	0.00025039	DOWN	PERO_DROME	Peroxidase
cluster_contig121	0.246234	0.674345	NC	1.02507	0.0318903	UP	-0.771337	0.116879	NC	XP_015108933.1	PREDICTED: uncharacterized protein LOC107035847 [Diachasma alloeum]
cluster_contig12103	-0.861759	0.057801	NC	0.88181	0.0646824	NC	-1.73175	5.79e-05	DOWN	EDEM3_HUMAN	ER degradation-enhancing alpha-mannosidase-like protein 3
cluster_contig12117	-1.05977	0.0266895	DOWN	-0.279655	0.668448	NC	-0.764543	0.14338	NC
cluster_contig12118	-0.48575	0.342384	NC	0.593202	0.258696	NC	-1.06438	0.0211414	DOWN	THIO_OPHHA	Thioredoxin
cluster_contig1213	0.63284	0.211495	NC	-0.436858	0.432439	NC	1.07996	0.0206939	UP	ITSN2_MOUSE	Intersectin-2
cluster_contig12131	1.51157	0.00238533	NC	1.11046	0.0200571	UP	0.408195	0.66814	NC	AN13C_HUMAN	Ankyrin repeat domain-containing protein 13C
cluster_contig12137	-1.2482	0.00492003	DOWN	0.865633	0.0949995	NC	-2.10392	2.58e-06	DOWN	HTH_DROME	Homeobox protein homothorax
cluster_contig12148	1.39292	0.00120846	UP	0.710201	0.145583	NC	0.70095	0.138906	NC	ORCT_DROME	Organic cation transporter protein
cluster_contig12152	-1.85894	9.51e-06	DOWN	-0.956644	0.0354	NC	-0.89326	0.0483146	NC	TRET1_CULQU	Facilitated trehalose transporter Tret1 {ECO:0000250|UniProtKB:Q7PIR5}
cluster_contig12155	1.88673	2.57e-05	UP	0.950337	0.0641914	NC	0.951602	0.0514086	NC	HPS1_MACFA	Hermansky-Pudlak syndrome 1 protein homolog
cluster_contig12160	1.29037	0.00379522	UP	0.795069	0.100558	NC	0.506153	0.336024	NC	NEUR_DROME	Protein neuralized
cluster_contig12173	-0.698103	0.134362	NC	-1.25299	0.00428464	DOWN	0.562707	0.249261	NC	CP4C1_BLADI	Cytochrome P450 4C1
cluster_contig12174	-0.380996	0.529933	NC	-1.15917	0.0166526	DOWN	0.790527	0.114234	NC
cluster_contig12179	-13.2217	2.28e-54	DOWN	-9.19053	1.91e-21	DOWN	-4.02451	1.52e-18	DOWN	TRIPC_RAT	E3 ubiquitin-protein ligase TRIP12
cluster_contig12187	0.533516	0.377649	NC	-0.774248	0.186813	NC	1.31419	0.0132284	UP
cluster_contig12194	-0.696637	0.257371	NC	2.62437	5.86e-06	UP	-3.30912	1.3e-08	DOWN	XP_013091018.1	PREDICTED: major royal jelly protein 5-like, partial [Biomphalaria glabrata]
cluster_contig122	-1.57686	0.00217731	DOWN	-1.55169	0.00290041	DOWN	-0.00931004	0.976954	NC
cluster_contig1220	-2.01962	9.97e-06	DOWN	-2.67137	4.69e-09	DOWN	0.659751	0.196743	NC	EPC1_MOUSE	Enhancer of polycomb homolog 1
cluster_contig12203	0.908609	0.162473	NC	-0.618331	0.301917	NC	1.5363	0.00712682	UP	VEIN_DROME	Protein vein
cluster_contig12205	-3.02972	7.32e-09	DOWN	-2.22041	8.95e-05	DOWN	-0.802744	0.096983	NC
cluster_contig12213	1.41794	0.00232481	UP	-0.0638602	0.958401	NC	1.49178	0.00141609	UP	HTH_DROME	Homeobox protein homothorax
cluster_contig12219	-0.162741	0.792454	NC	-1.23073	0.00628195	DOWN	1.07648	0.0175071	UP	PIGF_HUMAN	Phosphatidylinositol-glycan biosynthesis class F protein
cluster_contig12226	-1.31931	0.00444743	DOWN	-0.329191	0.636842	NC	-0.979894	0.0402136	NC	GALT3_DROME	Polypeptide N-acetylgalactosaminyltransferase 3
cluster_contig1223	7.69949	1.25e-12	NC	-1.55037	0.00202241	NC	9.16405	1.65e-21	UP	ESCA_DROME	Protein escargot
cluster_contig12234	-2.95787	1.66e-11	DOWN	-1.83129	4.32e-05	DOWN	-1.11729	0.0115778	DOWN	HNRPK_CHICK	Heterogeneous nuclear ribonucleoprotein K
cluster_contig12239	0.0465141	0.947414	NC	2.44872	3.3e-07	UP	-2.38697	7.55e-07	DOWN	ZC21C_MOUSE	Zinc finger C2HC domain-containing protein 1C
cluster_contig12240	0.250375	0.659703	NC	1.09913	0.0194466	UP	-0.836135	0.0867618	NC	CPN2_MOUSE	Carboxypeptidase N subunit 2
cluster_contig12249	-1.86557	1.48e-05	DOWN	-1.51758	0.000603348	DOWN	-0.332874	0.555968	NC	RNH1_MOUSE	Ribonuclease H1
cluster_contig12258	-0.926749	0.0510001	NC	0.583015	0.243646	NC	-1.49762	0.000696972	DOWN	EPN2_MOUSE	Epsin-2
cluster_contig12264	-1.23166	0.00458103	DOWN	0.317709	0.58044	NC	-1.53634	0.000328832	DOWN	GLPK3_HUMAN	Putative glycerol kinase 3
cluster_contig12268	-2.14668	1.95e-05	DOWN	0	1	NC	-2.03704	9.94e-05	DOWN	SCHI1_HUMAN	Schwannomin-interacting protein 1
cluster_contig1228	-1.19122	0.00628832	DOWN	-0.622954	0.211442	NC	-0.558941	0.253493	NC	OTU1_DROME	Ubiquitin thioesterase OTU1
cluster_contig12284	1.40039	0.0025596	NC	-1.58429	0.000342922	DOWN	2.99909	1.89e-11	NC	RPGF6_HUMAN	Rap guanine nucleotide exchange factor 6
cluster_contig12286	0	1	NC	-10.8183	7.15e-34	DOWN	10.712	3.28e-33	UP	RPGF6_HUMAN	Rap guanine nucleotide exchange factor 6
cluster_contig12290	-1.70125	0.00178744	DOWN	-1.65186	0.00321427	DOWN	-0.0413632	0.945041	NC
cluster_contig12299	0.0585809	0.933908	NC	-1.0948	0.0315269	DOWN	1.16339	0.0171764	UP	GAGA_DROME	Transcription factor GAGA
cluster_contig12300	0.407704	0.450636	NC	-0.589446	0.249946	NC	1.00704	0.0298744	UP	DNAT_DROME	Dopamine N-acetyltransferase {ECO:0000312|EMBL:AAF47172.1}
cluster_contig12308	0	1	NC	-1.59571	0.0498252	DOWN	2.82194	0.0013799	NC
cluster_contig1231	0.84728	0.0836629	NC	-0.646149	0.213402	NC	1.50664	0.000980039	UP	SMO_DROME	Protein smoothened
cluster_contig12311	-1.09441	0.0579951	NC	-1.14542	0.0463661	DOWN	0.0649129	0.965022	NC	PP12C_MOUSE	Protein phosphatase 1 regulatory subunit 12C
cluster_contig1233	-20.2453	1.72e-151	DOWN	-16.9925	2.1e-122	NC	-3.23568	4.1e-14	NC	POL1_TORVR	RNA1 polyprotein
cluster_contig12341	-0.899953	0.0784971	NC	-1.41403	0.00309412	DOWN	0.534775	0.32801	NC	MCFD2_PONAB	Multiple coagulation factor deficiency protein 2 homolog
cluster_contig12354	-1.04763	0.0193598	DOWN	-0.226298	0.722789	NC	-0.810743	0.0819869	NC	PGM2_HUMAN	Phosphoglucomutase-2
cluster_contig12356	-1.51149	0.000419231	DOWN	-0.471571	0.370524	NC	-1.02794	0.022931	DOWN	LUCI_PHOPE	Luciferin 4-monooxygenase
cluster_contig12359	7.08421	2.07e-09	UP	2.20482	0.000916551	NC	0	1	NC	FL2D_DROME	Pre-mRNA-splicing regulator female-lethal(2)D
cluster_contig1236	1.06807	0.0249377	UP	-1.06	0.0216896	DOWN	2.14023	1.28e-06	UP	USP9X_HUMAN	Probable ubiquitin carboxyl-terminal hydrolase FAF-X
cluster_contig12362	-2.08721	3.09e-05	DOWN	0	1	NC	-2.12542	0.000117988	DOWN	MET14_DROME	Methyltransferase-like protein 14 homolog
cluster_contig12363	-1.7059	0.000184775	DOWN	0.368347	0.650207	NC	-2.05955	1.61e-05	DOWN	GNL1_RAT	Guanine nucleotide-binding protein-like 1
cluster_contig12372	0.393596	0.466949	NC	-0.720472	0.14619	NC	1.12733	0.0129882	UP	EGFR_APIME	Epidermal growth factor receptor
cluster_contig12383	1.23694	0.0222152	UP	-0.0300914	0.992272	NC	1.27481	0.0210323	UP	MSTAA_DROME	Protein msta, isoform A
cluster_contig12388	1.30401	0.00334787	UP	0.364259	0.536185	NC	0.95464	0.0410702	NC	ABCA5_MOUSE	ATP-binding cassette sub-family A member 5
cluster_contig12398	-1.67538	0.00155322	DOWN	0	1	NC	-1.53826	0.0115597	DOWN
cluster_contig12400	0.698839	0.185706	NC	9.09799	9.76e-20	UP	-8.28431	9.44e-16	DOWN
cluster_contig12402	-1.6421	0.000106164	DOWN	-0.879382	0.0580382	NC	-0.759416	0.102687	NC	MAL2_DROVI	Maltase 2
cluster_contig12403	-1.34452	0.001686	DOWN	-0.638046	0.19227	NC	-0.702192	0.13434	NC	MAL1_DROVI	Maltase 1
cluster_contig12409	0.383011	0.462313	NC	1.25332	0.00444745	UP	-0.861113	0.0601804	NC	SRRM2_MOUSE	Serine/arginine repetitive matrix protein 2
cluster_contig12415	1.9044	0.00331994	UP	0.491925	0.496878	NC	0	1	NC
cluster_contig12419	1.40245	0.0218474	UP	1.10856	0.0995884	NC	0	1	NC
cluster_contig12420	-0.302154	0.5777	NC	1.02156	0.025814	UP	-1.31715	0.00264491	DOWN	CHS8_USTMA	Chitin synthase 8
cluster_contig12422	-2.90888	1.98e-10	DOWN	-0.703402	0.227376	NC	-2.19526	1.67e-06	DOWN	ATE1_HUMAN	Arginyl-tRNA--protein transferase 1
cluster_contig12425	-0.569295	0.394935	NC	1.02143	0.245932	NC	-1.57879	0.0294862	DOWN	S17A5_HUMAN	Sialin
cluster_contig12436	-1.26417	0.00899368	DOWN	-1.52732	0.00131371	DOWN	0.276628	0.657321	NC	OCTL_DROME	Organic cation transporter-like protein
cluster_contig12438	1.23377	0.00560189	UP	0.604522	0.240291	NC	0.641693	0.197007	NC	CNTN2_CHICK	Contactin-2
cluster_contig12453	-1.13793	0.0280371	DOWN	-0.63601	0.35267	NC	-0.491449	0.346501	NC	LOV_DROME	Protein jim lovell
cluster_contig12458	-1.26118	0.00429377	DOWN	0.501144	0.365965	NC	-1.74992	6.42e-05	DOWN	LUCI_LUCMI	Luciferin 4-monooxygenase
cluster_contig12459	-1.29557	0.0027994	DOWN	0.910444	0.0524447	NC	-2.19327	2.55e-07	DOWN	LUCI_LUCMI	Luciferin 4-monooxygenase
cluster_contig12473	-0.387805	0.458944	NC	0.623017	0.209674	NC	-1.00091	0.0261949	DOWN	PNKP_HUMAN	Bifunctional polynucleotide phosphatase/kinase
cluster_contig12492	-2.34256	3.88e-08	DOWN	-1.59894	0.000255359	DOWN	-0.734152	0.117397	NC	AR8BA_DANRE	ADP-ribosylation factor-like protein 8B-A
cluster_contig12495	-7.78644	6.22e-13	DOWN	0	1	NC	-7.68686	2.61e-12	DOWN	LAP4_DROME	Protein lap4
cluster_contig12503	1.94597	0.000761067	UP	0.0286776	0.989659	NC	0	1	NC	PERC_DROME	Chorion peroxidase
cluster_contig12523	-1.34497	0.0161178	DOWN	-2.10332	3.93e-05	DOWN	0.775645	0.122148	NC
cluster_contig12527	-1.29016	0.00725347	DOWN	-0.703653	0.256539	NC	-0.576699	0.229969	NC	DUSTY_APIME	Dual serine/threonine and tyrosine protein kinase {ECO:0000303|PubMed:17123648}
cluster_contig12537	-1.30162	0.00263593	DOWN	2.91764	7.69e-11	UP	-4.2139	4.68e-20	DOWN	NDRG3_HUMAN	Protein NDRG3
cluster_contig1254	-0.077328	0.902985	NC	1.07997	0.0169684	UP	-1.14283	0.00997646	DOWN	FSH_DROME	Homeotic protein female sterile
cluster_contig12547	-2.16199	2.81e-07	DOWN	-0.687941	0.159528	NC	-1.46559	0.000652016	DOWN	DDI2_XENTR	Protein DDI1 homolog 2
cluster_contig12548	-1.69186	6.12e-05	DOWN	0.496837	0.335883	NC	-2.18909	1.8e-07	DOWN	DDI2_XENTR	Protein DDI1 homolog 2
cluster_contig12551	-1.32748	0.00530986	DOWN	2.70868	8.96e-07	NC	-4.02266	4.78e-14	NC
cluster_contig12557	-1.3676	0.00168264	DOWN	0.545568	0.292076	NC	-1.90562	8.12e-06	DOWN	CL004_PONAB	Uncharacterized protein C12orf4 homolog
cluster_contig12565	-0.991147	0.0383761	NC	0.194191	0.873629	NC	-1.17209	0.0244151	DOWN	KGP1_DROME	cGMP-dependent protein kinase, isozyme 1
cluster_contig12566	-3.29746	2.91e-10	DOWN	-2.49277	7.06e-06	DOWN	-0.79656	0.111857	NC
cluster_contig12567	-1.96645	0.000426423	DOWN	0	1	NC	-1.31776	0.0117128	NC
cluster_contig12573	0.196306	0.77679	NC	-0.929266	0.0655725	NC	1.14359	0.0189567	UP	RN19A_HUMAN	E3 ubiquitin-protein ligase RNF19A
cluster_contig12574	0.593833	0.220073	NC	1.18258	0.00809182	UP	-0.578895	0.241332	NC	DLL_DROME	Homeotic protein distal-less
cluster_contig1258	-1.08675	0.0158818	DOWN	0.214822	0.758384	NC	-1.29506	0.0041415	DOWN	SEC62_HUMAN	Translocation protein SEC62
cluster_contig12583	10.4147	2.11e-31	UP	10.4271	1.46e-29	UP	0	1	NC	CDK1_DROME	Cyclin-dependent kinase 1
cluster_contig12584	-1.33262	0.00277554	DOWN	-0.218423	0.777405	NC	-1.10406	0.0137678	DOWN	TTPAL_PONAB	Alpha-tocopherol transfer protein-like
cluster_contig12589	1.29097	0.00594577	UP	0.561704	0.256762	NC	0.73825	0.183453	NC	SXL_MEGSC	Sex-lethal homolog
cluster_contig1259	-1.24228	0.00519867	DOWN	-0.789065	0.108853	NC	-0.444458	0.399364	NC	XP_015108578.1	PREDICTED: glutamic acid-rich protein-like [Diachasma alloeum]
cluster_contig12590	0.688664	0.157022	NC	-0.700039	0.157142	NC	1.40133	0.00154674	UP	SEPT4_MACFA	Septin-4
cluster_contig12595	1.15822	0.0086985	UP	-0.80123	0.0897436	NC	1.97677	3.18e-06	UP	L259_DROME	Probable multidrug resistance-associated protein lethal(2)03659
cluster_contig12597	-4.02768	3.62e-12	NC	-2.60613	0.000117823	NC	-1.40643	0.00270366	DOWN	RRP7A_PONAB	Ribosomal RNA-processing protein 7 homolog A
cluster_contig126	-1.01583	0.0561548	NC	0.422407	0.533837	NC	-1.42666	0.00590506	DOWN	STMN3_RAT	Stathmin-3
cluster_contig12604	-0.968373	0.0305599	NC	-1.06021	0.0187652	DOWN	0.102546	0.874055	NC	UPP1_MOUSE	Uridine phosphorylase 1
cluster_contig12606	-1.46733	0.000665636	DOWN	-1.39445	0.00148785	DOWN	-0.0571013	0.935681	NC	EP15R_HUMAN	Epidermal growth factor receptor substrate 15-like 1
cluster_contig12607	-1.02915	0.021515	DOWN	0.407702	0.436643	NC	-1.4318	0.000839076	DOWN	LZTR1_HUMAN	Leucine-zipper-like transcriptional regulator 1
cluster_contig12608	0.510041	0.317051	NC	-0.484475	0.361186	NC	1.01109	0.027596	UP	LZTR1_HUMAN	Leucine-zipper-like transcriptional regulator 1
cluster_contig12609	-1.02072	0.0232113	DOWN	-1.61154	0.00020835	DOWN	0.603055	0.220941	NC	XP_015126381.1	PREDICTED: uncharacterized protein LOC107047959 [Diachasma alloeum]
cluster_contig12611	-1.00193	0.0258237	DOWN	-0.978567	0.0337431	NC	-0.0102061	0.994881	NC	LPP_MOUSE	Lipoma-preferred partner homolog
cluster_contig12617	-1.61347	0.000311229	NC	-1.2764	0.00628757	DOWN	-0.327099	0.559466	NC	SMRC2_HUMAN	SWI/SNF complex subunit SMARCC2
cluster_contig12621	-1.3476	0.00190624	DOWN	-0.685049	0.165082	NC	-0.650283	0.178286	NC	UCK_DROME	Probable uridine-cytidine kinase
cluster_contig12625	0.76788	0.105501	NC	1.29359	0.00442805	UP	-0.519252	0.321175	NC	RXR_LYMST	Retinoic acid receptor RXR {ECO:0000250|UniProtKB:Q8T5C6}
cluster_contig12632	-1.29822	0.00267038	DOWN	-0.995236	0.0287227	NC	-0.281137	0.617157	NC	ISCU_MOUSE	Iron-sulfur cluster assembly enzyme ISCU, mitochondrial
cluster_contig12634	0.148861	0.906322	NC	-1.05033	0.0585564	NC	1.21154	0.0294408	UP	KIF19_MOUSE	Kinesin-like protein KIF19
cluster_contig12635	0	1	NC	-2.40144	8.47e-05	DOWN	1.14387	0.0480419	UP
cluster_contig12647	2.18749	1.27e-06	UP	0.663737	0.222911	NC	1.54402	0.000984327	UP	NOTCH_DROME	Neurogenic locus Notch protein
cluster_contig1265	0.573396	0.262152	NC	-1.19012	0.00941994	DOWN	1.76955	5.81e-05	UP	RU17_DROME	U1 small nuclear ribonucleoprotein 70 kDa
cluster_contig12655	-1.29953	0.00655953	DOWN	-1.71183	0.000255097	DOWN	0.428416	0.422636	NC	TITIN_MOUSE	Titin
cluster_contig12658	-1.00436	0.0254079	DOWN	0.419795	0.468734	NC	-1.40878	0.00150552	DOWN	GCSP_MOUSE	Glycine dehydrogenase (decarboxylating), mitochondrial
cluster_contig1266	-4.43251	1.59e-18	NC	-2.11698	0.000131023	NC	-2.30041	2.94e-07	DOWN	DNK_DROME	Deoxynucleoside kinase
cluster_contig12668	-1.33684	0.00466678	NC	0.0181254	0.928922	NC	-1.33907	0.0031742	DOWN	I7_AMEPV	Core protease I7 homolog
cluster_contig12669	-3.60198	6.3e-11	DOWN	0	1	NC	-3.88133	1.29e-09	NC	I7_AMEPV	Core protease I7 homolog
cluster_contig12684	-9.56465	8.4e-25	DOWN	0	1	NC	-3.36836	5.68e-09	NC	VAT1L_HUMAN	Synaptic vesicle membrane protein VAT-1 homolog-like
cluster_contig12686	0.085714	0.903047	NC	-2.44107	2.25e-08	DOWN	2.53925	5.91e-09	UP	PPN_DROME	Papilin
cluster_contig1269	-3.3602	1.3e-07	DOWN	0	1	NC	-7.66195	4.21e-12	DOWN	DISP1_DANRE	Protein dispatched homolog 1
cluster_contig12695	-0.772009	0.099154	NC	-1.39351	0.0015115	DOWN	0.627403	0.196012	NC	TMM8A_MOUSE	Transmembrane protein 8A
cluster_contig12706	-1.3332	0.00855694	DOWN	-0.8775	0.113784	NC	-0.448596	0.462326	NC	ITBN_DROME	Integrin beta-nu
cluster_contig12708	0.84607	0.0962396	NC	-0.302734	0.650412	NC	1.15871	0.017699	UP
cluster_contig12711	-3.19206	2.87e-08	NC	0	1	NC	-8.47614	5.86e-17	DOWN
cluster_contig1272	1.01713	0.0239902	UP	1.05933	0.0197312	UP	-0.0343749	0.960542	NC	NXF1_DROME	Nuclear RNA export factor 1
cluster_contig12740	1.54565	0.000755623	UP	2.40161	8.34e-08	UP	-0.845251	0.0833993	NC	XP_015114139.1	PREDICTED: uncharacterized protein LOC107039168 [Diachasma alloeum]
cluster_contig12748	-0.227965	0.874025	NC	-2.16623	3.03e-05	NC	1.95566	6.11e-05	UP	PCMD2_PONAB	Protein-L-isoaspartate O-methyltransferase domain-containing protein 2
cluster_contig1275	-3.96716	7.51e-09	NC	0	1	NC	-1.99098	0.00254468	DOWN
cluster_contig12754	-1.29298	0.00266714	DOWN	-0.44051	0.407161	NC	-0.839834	0.0667967	NC	TXNL1_HUMAN	Thioredoxin-like protein 1
cluster_contig12757	-1.20884	0.011724	DOWN	-0.764366	0.166025	NC	-0.435445	0.428898	NC	TBA_XENLA	Tubulin alpha chain
cluster_contig1276	-1.24558	0.00470028	DOWN	-0.854476	0.0740467	NC	-0.378192	0.47732	NC	UBCD1_DROME	Ubiquitin-conjugating enzyme E2-17 kDa
cluster_contig1277	-3.22264	1.67e-06	DOWN	-3.24458	4.93e-06	DOWN	0.0257118	0.925433	NC	GNRR2_CLAGA	Gonadotropin-releasing hormone II receptor
cluster_contig12784	-1.11158	0.109275	NC	-1.4992	0.0149329	DOWN	0.4023	0.596756	NC
cluster_contig12794	8.25075	8.92e-16	UP	-2.48111	2.42e-08	DOWN	10.6435	1.17e-32	UP	NBEA_DROME	Neurobeachin
cluster_contig1280	-4.3846	3.39e-09	DOWN	0	1	NC	-0.77238	0.262388	NC
cluster_contig12804	-0.71934	0.159993	NC	8.12742	1.85e-13	NC	-8.7298	1.22e-18	DOWN	ABLM2_HUMAN	Actin-binding LIM protein 2
cluster_contig12818	-2.6867	1.34e-07	DOWN	-1.28539	0.0456884	NC	-1.39457	0.0023995	NC	H1B_CHITE	Histone H1B
cluster_contig12819	-1.61353	0.000347814	NC	8.11867	2.25e-13	NC	-9.6196	1.56e-23	DOWN	DCTN6_DANRE	Dynactin subunit 6
cluster_contig1283	1.49966	0.000566338	UP	1.42528	0.00101333	NC	0.0936026	0.920382	NC	SMG8_CULQU	Protein SMG8
cluster_contig12837	0.153158	0.821831	NC	9.1607	3.85e-20	UP	-8.88694	1.15e-19	DOWN	MRP5_RAT	Multidrug resistance-associated protein 5
cluster_contig12854	-1.22328	0.00550542	DOWN	0.18986	0.795263	NC	-1.39534	0.00174364	DOWN	NLE1_HUMAN	Notchless protein homolog 1
cluster_contig12855	1.23254	0.00500344	UP	0.480314	0.367041	NC	0.761175	0.108027	NC	SPTCB_DROME	Spectrin beta chain
cluster_contig12874	0	1	NC	-1.18108	0.0594246	NC	2.79911	6.46e-06	UP
cluster_contig12876	-0.748785	0.105034	NC	0.928352	0.0444776	NC	-1.66021	9.65e-05	DOWN	ARAP2_MOUSE	Arf-GAP with Rho-GAP domain, ANK repeat and PH domain-containing protein 2
cluster_contig12878	-0.978161	0.057801	NC	-1.24641	0.0118438	DOWN	0.285055	0.615057	NC	SIX1B_DANRE	Homeobox protein six1b
cluster_contig12880	0.607991	0.252415	NC	3.01423	5.53e-08	UP	-2.38671	4.17e-05	DOWN	S39AD_DROME	Zinc transporter ZIP13 homolog
cluster_contig12882	-1.04781	0.0189031	DOWN	-0.479452	0.363105	NC	-0.550626	0.277061	NC	MED4_ANOGA	Mediator of RNA polymerase II transcription subunit 4
cluster_contig12887	-1.15887	0.00813121	DOWN	1.20238	0.00628399	NC	-2.36152	2.04e-08	NC	STRN3_BOVIN	Striatin-3
cluster_contig12891	-0.144524	0.82584	NC	9.32163	2.93e-21	UP	-9.35421	1.38e-21	DOWN	TRET1_POLVA	Facilitated trehalose transporter Tret1 {ECO:0000303|PubMed:17606922, ECO:0000312|EMBL:BAF63703.1}
cluster_contig12904	1.82566	1.69e-05	UP	2.46563	8.41e-09	UP	-0.629086	0.20335	NC	SYFAB_XENLA	Phenylalanine--tRNA ligase alpha subunit B
cluster_contig12905	-0.96167	0.034815	NC	2.03985	3.66e-06	UP	-2.98825	1.07e-11	DOWN	SYFAB_XENLA	Phenylalanine--tRNA ligase alpha subunit B
cluster_contig12914	0	1	NC	-7.47432	1.05e-10	DOWN	1.3689	0.0429378	NC	KMCP1_RAT	Kidney mitochondrial carrier protein 1
cluster_contig12925	-1.06401	0.0153878	DOWN	-0.266397	0.651801	NC	-0.785777	0.0888533	NC	SKP1_XENLA	S-phase kinase-associated protein 1
cluster_contig12926	-1.50857	0.000435534	NC	-1.34496	0.00220705	DOWN	-0.143944	0.826988	NC	SCRB1_BOVIN	Scavenger receptor class B member 1
cluster_contig1293	0	1	NC	-8.78212	1.09e-18	DOWN	2.5067	1.29e-06	NC	AREL1_HUMAN	Apoptosis-resistant E3 ubiquitin protein ligase 1
cluster_contig12948	1.19167	0.0151355	UP	0.740326	0.169373	NC	0.461802	0.442921	NC	CGAT2_HUMAN	Chondroitin sulfate N-acetylgalactosaminyltransferase 2
cluster_contig1295	0	1	NC	-1.95317	0.00173971	DOWN	1.18621	0.0691863	NC
cluster_contig12950	-0.0763318	0.911993	NC	0.940842	0.0754318	NC	-1.0055	0.0482501	DOWN	APC1_HUMAN	Anaphase-promoting complex subunit 1
cluster_contig12958	0.805647	0.153147	NC	-0.299783	0.723335	NC	1.11467	0.0461607	UP
cluster_contig1296	0.0768266	0.9026	NC	-1.43025	0.0012674	DOWN	1.51522	0.000516001	UP	PDIA3_PONAB	Protein disulfide-isomerase A3
cluster_contig12962	-0.582173	0.233615	NC	1.29648	0.00302563	UP	-1.87032	1.01e-05	DOWN	XRN1_HUMAN	5'-3' exoribonuclease 1
cluster_contig1297	-0.556299	0.251201	NC	0.950791	0.0399586	NC	-1.49344	0.000530524	DOWN	PDIA3_PONAB	Protein disulfide-isomerase A3
cluster_contig12984	-0.208883	0.717413	NC	-1.20164	0.00672167	DOWN	1.0031	0.0254168	UP	TAKT_DROME	Protein takeout
cluster_contig12986	-1.3587	0.00546389	DOWN	-1.37015	0.0061082	DOWN	0.0207332	0.99719	NC
cluster_contig12989	-1.4068	0.00754668	DOWN	-1.6805	0.00132883	DOWN	0.280491	0.694934	NC
cluster_contig12998	-2.09422	5.88e-07	DOWN	0.208991	0.742429	NC	-2.28483	5.93e-08	DOWN	PUR1_DROME	Amidophosphoribosyltransferase
cluster_contig13004	0.284019	0.609483	NC	-0.78283	0.10502	NC	1.07731	0.0170054	UP	MNB_DROME	Serine/threonine-protein kinase minibrain
cluster_contig13014	-1.46133	0.0037858	DOWN	-0.809529	0.178051	NC	-0.645767	0.242529	NC	LGR4_MOUSE	Leucine-rich repeat-containing G-protein coupled receptor 4
cluster_contig1302	-0.658055	0.219871	NC	-1.7005	0.000208175	NC	1.05611	0.0238147	UP	JIP3_MOUSE	C-Jun-amino-terminal kinase-interacting protein 3
cluster_contig13023	0.71226	0.156441	NC	-1.55905	0.000450841	DOWN	2.28254	2.15e-07	UP	DYST_HUMAN	Dystonin
cluster_contig13025	-1.33401	0.00463218	DOWN	-1.86545	4.21e-05	DOWN	0.539122	0.300517	NC	GAPR1_HUMAN	Golgi-associated plant pathogenesis-related protein 1
cluster_contig13029	-2.09975	0.000111204	DOWN	0	1	NC	-1.41602	0.037923	DOWN
cluster_contig13033	0.999324	0.0247687	NC	1.12545	0.0117692	UP	-0.120904	0.848814	NC	SYIC_HUMAN	Isoleucine--tRNA ligase, cytoplasmic
cluster_contig13034	1.26679	0.0143912	UP	1.46596	0.00265184	UP	0	1	NC	MYCB2_HUMAN	E3 ubiquitin-protein ligase MYCBP2
cluster_contig13037	-1.97913	0.000942649	DOWN	-2.20568	0.000136488	DOWN	0.235099	0.738804	NC
cluster_contig13041	-0.617482	0.205833	NC	-1.32806	0.00286282	DOWN	0.727101	0.126396	NC	DUS10_BOVIN	Dual specificity protein phosphatase 10
cluster_contig13042	-1.86868	0.00289973	DOWN	0	1	NC	-0.845611	0.352874	NC	UNC79_HUMAN	Protein unc-79 homolog
cluster_contig1305	-0.0802866	0.915276	NC	1.14238	0.0365785	UP	-1.2095	0.024422	DOWN	TL5B_TACTR	Techylectin-5B
cluster_contig1306	0.904737	0.0602859	NC	1.29724	0.0124174	UP	-0.374506	0.645304	NC	MRP4_HUMAN	Multidrug resistance-associated protein 4
cluster_contig13060	-1.85035	1.88e-05	DOWN	-0.517458	0.325203	NC	-1.3214	0.00369898	DOWN	PKN2_DANRE	Serine/threonine-protein kinase N2
cluster_contig13066	-1.91159	2.94e-05	DOWN	0.581327	0.441297	NC	-2.47942	4.69e-07	DOWN	NTP1_MSEPV	Nucleoside triphosphatase I
cluster_contig1307	-1.40649	0.00116208	DOWN	-0.766528	0.111907	NC	-0.623453	0.199283	NC	MYLK3_DANRE	Myosin light chain kinase 3
cluster_contig13070	-8.79389	2.75e-19	DOWN	-6.30146	7e-06	NC	-2.48632	5.86e-07	NC	MARH3_BOVIN	E3 ubiquitin-protein ligase MARCH3
cluster_contig13071	-1.52704	0.000632916	DOWN	0.447654	0.529589	NC	-1.95503	3.38e-05	DOWN	RGF1B_MOUSE	Ras-GEF domain-containing family member 1B
cluster_contig13079	-2.3048	8.08e-08	DOWN	-1.51559	0.000656134	DOWN	-0.7765	0.0989145	NC	BCAT1_MOUSE	Branched-chain-amino-acid aminotransferase, cytosolic
cluster_contig13085	-1.01973	0.0219379	DOWN	-0.510025	0.326935	NC	-0.499865	0.321527	NC	SPIN_DROME	Protein spinster
cluster_contig13087	-1.07611	0.0154099	DOWN	-1.60111	0.000208089	DOWN	0.537575	0.276116	NC	AT8A1_MOUSE	Phospholipid-transporting ATPase IA
cluster_contig13088	-1.48539	0.00281006	DOWN	-1.5384	0.00228423	DOWN	0.0617932	0.938683	NC	C4G15_DROME	Cytochrome P450 4g15
cluster_contig1309	-1.77697	4.27e-05	DOWN	-0.742608	0.151149	NC	-1.02546	0.021124	DOWN	BAIP3_MOUSE	BAI1-associated protein 3
cluster_contig13093	-1.15022	0.00902477	DOWN	-1.23868	0.00524113	DOWN	0.0964251	0.881469	NC	KHK_RAT	Ketohexokinase
cluster_contig13097	-1.03365	0.021515	DOWN	-0.427236	0.433076	NC	-0.593331	0.236103	NC	M10L1_MOUSE	Putative helicase Mov10l1
cluster_contig13103	-1.91369	2.72e-05	DOWN	-0.224691	0.842713	NC	-1.6716	0.000149555	NC	ACO11_SPOLI	Acyl-CoA Delta(11) desaturase
cluster_contig13108	-1.68125	0.00181071	DOWN	-1.46842	0.00970699	DOWN	-0.202705	0.789527	NC	PAOX_HUMAN	Peroxisomal N(1)-acetyl-spermine/spermidine oxidase
cluster_contig13119	-2.05278	0.000264399	DOWN	-2.28943	3.52e-05	DOWN	0.245719	0.779176	NC
cluster_contig13122	1.36776	0.00159493	UP	1.73272	6.66e-05	UP	-0.358405	0.527476	NC	CP6K1_BLAGE	Cytochrome P450 6k1
cluster_contig13126	-1.9628	0.000177118	NC	0.0337851	1	NC	-1.99061	0.00032077	DOWN	WHITE_CERCA	Protein white
cluster_contig1313	0.215794	0.844842	NC	1.26933	0.0214455	UP	0	1	NC
cluster_contig13139	-0.651896	0.383684	NC	6.60958	2.4e-07	UP	0	1	NC	TRYZ_DROME	Trypsin zeta
cluster_contig1314	2.91482	6.45e-11	UP	0.69446	0.15496	NC	2.22279	7.36e-07	UP	GNAQ_DROME	G protein alpha q subunit
cluster_contig13145	1.19722	0.0391354	UP	-1.36055	0.00560745	NC	2.57433	4.01e-07	NC
cluster_contig13148	-3.28472	1.46e-12	DOWN	-1.28002	0.0156862	NC	-1.98752	5.29e-06	NC	SDS3_MOUSE	Sin3 histone deacetylase corepressor complex component SDS3
cluster_contig13153	-2.63547	1.56e-09	DOWN	-2.10047	1.96e-06	DOWN	-0.524811	0.326293	NC	WWOX_DROME	WW domain-containing oxidoreductase
cluster_contig13156	-0.348969	0.566339	NC	0.845055	0.0996428	NC	-1.18364	0.0142664	DOWN	PHRF1_HUMAN	PHD and RING finger domain-containing protein 1
cluster_contig13157	-0.568244	0.253543	NC	0.561918	0.268633	NC	-1.12432	0.0116234	DOWN	YL357_MIMIV	Uncharacterized protein L357
cluster_contig1316	-1.13308	0.0138151	DOWN	9.51247	1.08e-22	UP	-10.5293	1.74e-30	DOWN	CACB2_HUMAN	Voltage-dependent L-type calcium channel subunit beta-2
cluster_contig13161	-2.0455	2.57e-06	DOWN	-1.88214	2.08e-05	DOWN	-0.159041	0.798201	NC	KI10A_DROME	Kinesin-like protein Klp10A
cluster_contig13162	1.18277	0.0078539	UP	1.27734	0.00357529	UP	-0.0823394	0.8775	NC	PP6R2_HUMAN	Serine/threonine-protein phosphatase 6 regulatory subunit 2
cluster_contig13168	-1.761	8.44e-05	DOWN	8.72141	3.35e-17	UP	-10.3649	3.49e-29	DOWN	MAB21_DROPS	Protein mab-21
cluster_contig1317	-8.53813	1.49e-17	DOWN	-9.30605	3.27e-22	DOWN	0.759529	0.164564	NC	CACB2_HUMAN	Voltage-dependent L-type calcium channel subunit beta-2
cluster_contig13176	1.37676	0.0317567	UP	-1.46959	0.00759628	DOWN	2.86059	2.83e-07	UP
cluster_contig13179	0	1	NC	-1.39752	0.00811122	DOWN	0.878395	0.121262	NC
cluster_contig13185	4.19047	3.46e-18	NC	-0.659711	0.183531	NC	4.87056	2.61e-23	UP	YCX91_PHAAO	Uncharacterized protein ORF91
cluster_contig13199	-1.37028	0.00266277	DOWN	-0.158476	0.830259	NC	-1.20325	0.0103578	DOWN	PF21A_HUMAN	PHD finger protein 21A
cluster_contig132	1.0645	0.103978	NC	2.05379	0.00110462	UP	0	1	NC
cluster_contig13211	-0.677691	0.160571	NC	0.840257	0.0738413	NC	-1.5083	0.000521161	DOWN	CK5P1_DROME	CDK5RAP1-like protein
cluster_contig13212	-2.56349	5.29e-09	DOWN	1.80982	0.000210806	NC	-4.35781	1.63e-19	NC	SC5A8_XENLA	Sodium-coupled monocarboxylate transporter 1
cluster_contig13214	2.44579	3.05e-06	NC	-3.40214	6.62e-14	DOWN	5.86233	9.06e-29	NC	ACSL4_HUMAN	Long-chain-fatty-acid--CoA ligase 4
cluster_contig13215	-1.05145	0.0366201	DOWN	0.165269	0.863762	NC	-1.20194	0.0217394	DOWN
cluster_contig13216	0.342182	0.519825	NC	1.18905	0.00926582	UP	-0.83564	0.0814045	NC	ADHX_SPAAU	Alcohol dehydrogenase class-3
cluster_contig13223	-3.62141	1.54e-13	DOWN	-1.93136	0.000255541	DOWN	-1.67424	0.000312002	DOWN	nelfe	negative elongation factor complex member E
cluster_contig13225	-7.87289	2.02e-13	DOWN	-7.25937	1.35e-09	NC	-0.622548	0.220309	NC	DDX18_DROME	Probable ATP-dependent RNA helicase pitchoune
cluster_contig13239	-0.500946	0.321647	NC	-1.79831	2.93e-05	DOWN	1.31767	0.00270366	NC	ANTR1_ARATH	Sodium-dependent phosphate transport protein 1, chloroplastic
cluster_contig13249	1.7438	9.47e-05	UP	1.37723	0.00187056	UP	0.375131	0.576134	NC	FXL16_RAT	F-box/LRR-repeat protein 16
cluster_contig13254	-1.32924	0.00516535	DOWN	-0.790186	0.131984	NC	-0.524137	0.362269	NC
cluster_contig13259	-2.83856	1.56e-08	DOWN	0	1	NC	-2.62225	8.94e-08	DOWN	H1B_CHITE	Histone H1B
cluster_contig13265	-1.14573	0.00851517	DOWN	-0.284898	0.624571	NC	-0.848625	0.063122	NC	7B2_XENLA	Neuroendocrine protein 7B2
cluster_contig13267	-2.4894	5.76e-09	DOWN	-1.32936	0.00295345	DOWN	-1.14958	0.00971796	DOWN	BGAL_FELCA	Beta-galactosidase
cluster_contig13271	-0.527755	0.30425	NC	1.20112	0.0137723	UP	-1.71441	0.000165211	DOWN	F10A1_CHICK	Hsc70-interacting protein
cluster_contig1329	-2.01337	0.000172455	DOWN	-1.38215	0.0197409	DOWN	-0.619325	0.298667	NC
cluster_contig13293	-1.32514	0.00269488	DOWN	-0.709972	0.166389	NC	-0.607798	0.206647	NC	S2611_HUMAN	Sodium-independent sulfate anion transporter
cluster_contig13297	-2.16267	6.86e-06	DOWN	-3.27813	4.86e-12	DOWN	1.12782	0.0138671	UP	PEPT1_DROME	Peptide transporter family 1
cluster_contig13302	1.45136	0.00466584	UP	-0.0461711	1	NC	1.50269	0.0049367	UP
cluster_contig13319	-1.48289	0.000632185	DOWN	0.442126	0.456079	NC	-1.91345	1.36e-05	DOWN	AT10D_HUMAN	Probable phospholipid-transporting ATPase VD
cluster_contig1332	1.44172	0.00164406	UP	-0.0635517	0.952519	NC	1.51232	0.00112286	UP
cluster_contig13320	2.13148	8e-07	UP	-0.342376	0.560124	NC	2.482	1.1e-08	UP	AT10A_MOUSE	Probable phospholipid-transporting ATPase VA
cluster_contig13321	-0.070057	0.91346	NC	1.45865	0.00088806	UP	-1.5198	0.000457408	DOWN	XP_015126057.1	PREDICTED: homeobox protein B-H1-like [Diachasma alloeum]
cluster_contig13322	-0.204427	0.72586	NC	1.09616	0.0143089	UP	-1.29199	0.00289807	DOWN	MPP5_PONAB	MAGUK p55 subfamily member 5
cluster_contig13323	0.795389	0.117004	NC	-0.223462	0.686948	NC	1.03528	0.0309713	UP	PEF1_HUMAN	Peflin
cluster_contig13329	1.58219	0.00175275	UP	0.584164	0.243642	NC	0.998173	0.1026	NC	QTRD1_AEDAE	Queuine tRNA-ribosyltransferase subunit QTRTD1 homolog {ECO:0000255|HAMAP-Rule:MF_03043}
cluster_contig13334	1.41243	0.00142451	UP	0.474409	0.371437	NC	0.947627	0.0468541	NC
cluster_contig13338	1.2944	0.0206255	UP	-1.47325	0.00179849	DOWN	2.78569	3.03e-08	UP
cluster_contig1334	1.57017	0.00021666	UP	1.30149	0.0028905	UP	0.276409	0.62287	NC	CHAD_HUMAN	Chondroadherin
cluster_contig1336	2.75632	1.26e-07	NC	-2.15663	1.75e-06	DOWN	4.92053	2.99e-21	NC	K1468_MOUSE	LisH domain and HEAT repeat-containing protein KIAA1468
cluster_contig13368	-1.117	0.0117352	DOWN	-0.179635	0.783801	NC	-0.928541	0.0442107	NC	FAS_MOUSE	Fatty acid synthase
cluster_contig13371	-1.67597	0.000122676	DOWN	-1.11059	0.0169683	DOWN	-0.555829	0.264328	NC	PIPA_DROME	1-phosphatidylinositol 4,5-bisphosphate phosphodiesterase
cluster_contig13372	-12.5791	3.84e-49	DOWN	0	1	NC	-6.67849	3.46e-36	NC	TMOD_CAEEL	Tropomodulin
cluster_contig13379	-0.951693	0.0807231	NC	-2.12833	1.26e-05	DOWN	1.18751	0.0172712	UP
cluster_contig13392	0.278774	0.682778	NC	8.46596	1.8e-15	UP	-8.08052	1.67e-14	NC	RGS7_BOVIN	Regulator of G-protein signaling 7
cluster_contig13395	-2.91586	1.22e-06	DOWN	0	1	NC	-2.69007	2.71e-06	NC	OR46a	odorant receptor 46a, isoform A-like isoform X2
cluster_contig13397	-2.87741	1.76e-07	DOWN	-1.16027	0.162526	NC	-1.70957	0.000373545	DOWN	SWAHC_MOUSE	Ankyrin repeat domain-containing protein SOWAHC
cluster_contig13399	-1.12965	0.0289723	DOWN	-0.577885	0.360727	NC	-0.54127	0.363015	NC	TITF1_CANFA	Thyroid transcription factor 1
cluster_contig134	-1.36229	0.0246208	DOWN	0	1	NC	-0.576544	0.416716	NC	OR22B	Odorant receptor 22b
cluster_contig1340	1.89231	0.00533761	NC	-1.43184	0.005031	DOWN	3.33233	1.88e-08	NC	NXF1_BOVIN	Nuclear RNA export factor 1
cluster_contig13401	1.35831	0.0149436	UP	1.00075	0.0556733	NC	0.371945	0.781491	NC
cluster_contig13405	-3.03045	4.48e-09	DOWN	-2.60849	8.69e-07	DOWN	-0.411159	0.486556	NC	RBP1_DROME	RNA-binding protein 1
cluster_contig13417	1.7597	4.94e-05	UP	0.479453	0.369074	NC	1.2913	0.00402431	UP	SET1_DROME	Histone-lysine N-methyltransferase SETD1 {ECO:0000250|UniProtKB:Q9UPS6}
cluster_contig13423	-2.23944	2.33e-06	NC	0.158286	0.858881	NC	-2.3858	8.25e-07	DOWN	CC017_DANRE	Uncharacterized protein C3orf17 homolog
cluster_contig13429	-1.11543	0.0142176	DOWN	0.660865	0.226717	NC	-1.75492	9.94e-05	DOWN	KIBRA_DROYA	Protein kibra
cluster_contig1343	-1.38375	0.00423959	DOWN	-1.25845	0.0107424	DOWN	-0.111029	0.918265	NC	RPGF2_RAT	Rap guanine nucleotide exchange factor 2
cluster_contig13431	-1.26695	0.00732354	DOWN	0.628623	0.405957	NC	-1.87522	0.000307761	DOWN	PLK2_MOUSE	Serine/threonine-protein kinase PLK2
cluster_contig13433	-1.6342	0.000199683	NC	0.229922	0.704021	NC	-1.85346	1.98e-05	DOWN	PLK2_MOUSE	Serine/threonine-protein kinase PLK2
cluster_contig13435	1.51722	0.00037199	UP	1.91	6.25e-06	UP	-0.378252	0.467846	NC	ARP5_AEDAE	Actin-related protein 5
cluster_contig13436	-0.127306	0.878006	NC	1.21465	0.0275295	UP	-1.33052	0.0167109	DOWN
cluster_contig13437	0	1	NC	-3.57934	3.15e-09	DOWN	0.951733	0.0819369	NC
cluster_contig13439	-3.35861	6.94e-11	DOWN	-2.43757	6.43e-06	DOWN	-0.903152	0.106394	NC	INSR_MOUSE	Insulin receptor
cluster_contig13442	-0.364648	0.633876	NC	-1.4949	0.00294386	DOWN	1.13908	0.0214577	UP	OCLP1_APIME	Omega-conotoxin-like protein 1
cluster_contig13449	-1.52015	0.0018062	DOWN	-0.940604	0.105964	NC	-0.572578	0.255023	NC	XKR4_RAT	XK-related protein 4
cluster_contig1345	-2.98274	8.38e-09	NC	-1.12129	0.157138	NC	-1.85968	4.03e-05	DOWN	OXDD_MOUSE	D-aspartate oxidase
cluster_contig13450	-0.863211	0.104341	NC	2.29849	0.000797528	UP	-3.15596	2.71e-07	NC	S4A10_BOVIN	Sodium-driven chloride bicarbonate exchanger
cluster_contig13453	-9.99558	4.73e-28	DOWN	0	1	NC	-9.88691	1.53e-25	DOWN	ERAP2_BOVIN	Endoplasmic reticulum aminopeptidase 2
cluster_contig13454	0	1	NC	-1.01632	0.0547724	NC	1.56254	0.00344332	UP
cluster_contig1346	1.31098	0.0487123	UP	0.906438	0.280147	NC	0	1	NC	IR25A	Ionotropic receptor 25a
cluster_contig13470	1.45557	0.00080557	UP	1.5208	0.000665602	UP	-0.0504427	0.971138	NC	DYST_HUMAN	Dystonin
cluster_contig13472	-2.14463	5.34e-05	DOWN	-1.34518	0.0412337	DOWN	-0.787809	0.121879	NC	HEY1_MOUSE	Hairy/enhancer-of-split related with YRPW motif protein 1
cluster_contig13484	1.32332	0.00387312	NC	1.71785	0.000235996	UP	-0.391152	0.541931	NC	OCRL_HUMAN	Inositol polyphosphate 5-phosphatase OCRL-1
cluster_contig13485	-0.66203	0.168625	NC	-1.6907	9.51e-05	DOWN	1.03904	0.0211804	UP	KIFA3_STRPU	Kinesin-associated protein 3
cluster_contig13486	-1.33009	0.00204054	DOWN	-0.81492	0.0842682	NC	-0.505214	0.311142	NC	ABHD5_PONAB	1-acylglycerol-3-phosphate O-acyltransferase ABHD5
cluster_contig13493	0.832226	0.0812259	NC	-0.295101	0.632713	NC	1.13493	0.0141545	UP	SPIN_DROME	Protein spinster
cluster_contig13495	0.264705	0.71901	NC	-1.26853	0.0114154	DOWN	1.54472	0.00231602	UP
cluster_contig13500	-1.38852	0.00319528	DOWN	0.586579	0.243031	NC	-1.97482	9.04e-06	NC	MYS9_DROME	Myosin heavy chain 95F
cluster_contig13509	-1.90863	0.00331994	DOWN	0	1	NC	-3.62479	9.76e-06	NC
cluster_contig13512	-0.796282	0.085345	NC	-1.31363	0.00283724	DOWN	0.527589	0.288663	NC	CEAD_ECOLX	Colicin-D
cluster_contig13518	-0.782004	0.160581	NC	-1.35962	0.00815907	DOWN	0.585864	0.327206	NC	Y8611_DROME	Probable ATP-dependent RNA helicase CG8611
cluster_contig1352	-1.55995	0.00327008	DOWN	0	1	NC	-1.49537	0.00707184	DOWN	ANXB9_DROME	Annexin B9
cluster_contig13522	1.85302	5.86e-05	UP	1.25828	0.00867262	NC	0.61502	0.272125	NC	GATB_CULQU	Glutamyl-tRNA(Gln) amidotransferase subunit B, mitochondrial {ECO:0000255|HAMAP-Rule:MF_03147}
cluster_contig13525	9.19951	3.24e-22	UP	9.2115	1.57e-20	UP	0	1	NC	GATB_CULQU	Glutamyl-tRNA(Gln) amidotransferase subunit B, mitochondrial {ECO:0000255|HAMAP-Rule:MF_03147}
cluster_contig1353	-3.25702	5.95e-11	NC	0	1	NC	-2.08637	1.35e-05	DOWN	ANXB9_DROME	Annexin B9
cluster_contig13553	-1.74435	0.00209724	NC	0	1	NC	-7.59959	8.8e-12	DOWN	MARH6_HUMAN	E3 ubiquitin-protein ligase MARCH6
cluster_contig13557	-3.45815	1.33e-13	NC	7.65909	3.86e-12	NC	-11.0048	3.05e-34	DOWN	SPX2_XENTR	Sugar phosphate exchanger 2
cluster_contig13558	-0.55346	0.265367	NC	0.620117	0.225373	NC	-1.16973	0.00961701	DOWN	TOM70_HUMAN	Mitochondrial import receptor subunit TOM70
cluster_contig13567	-1.34444	0.00254153	DOWN	-0.100047	0.920076	NC	-1.23718	0.00521758	DOWN
cluster_contig13574	1.39572	0.00452752	UP	1.4452	0.00873822	UP	-0.0344977	0.983413	NC	ERP44_MOUSE	Endoplasmic reticulum resident protein 44
cluster_contig13587	-0.696508	0.137776	NC	-1.88815	8.66e-06	DOWN	1.20526	0.00576315	UP	LAMA_DROME	Laminin subunit alpha
cluster_contig13588	-0.984424	0.0331496	NC	0.51817	0.321805	NC	-1.49053	0.000707283	DOWN	RNF41_MOUSE	E3 ubiquitin-protein ligase NRDP1
cluster_contig1359	-2.87493	5.64e-09	NC	-1.28947	0.029104	NC	-1.57445	0.00117161	DOWN	VMP03_EULPE	Venom metalloproteinase 3
cluster_contig13595	-1.72063	5.65e-05	DOWN	0.74721	0.117256	NC	-2.44704	8.56e-09	NC	GRCR1_DROME	Glutaredoxin domain-containing cysteine-rich protein CG31559
cluster_contig13597	0.352264	0.509279	NC	-0.693141	0.156376	NC	1.05767	0.0183356	UP	SUZ12_MOUSE	Polycomb protein Suz12
cluster_contig13608	0.311145	0.582406	NC	-0.713663	0.150877	NC	1.04078	0.0243792	UP	BLMH_CHICK	Bleomycin hydrolase
cluster_contig13611	0.785338	0.11477	NC	-0.948169	0.0448779	NC	1.74585	9.37e-05	UP	ODO1_MACFA	2-oxoglutarate dehydrogenase, mitochondrial
cluster_contig13613	10.6478	7.63e-32	NC	0.52321	0.292497	NC	10.0293	7.3e-28	UP	ODO1_MACFA	2-oxoglutarate dehydrogenase, mitochondrial
cluster_contig13624	-1.52938	0.0095269	DOWN	0	1	NC	-0.422315	0.460176	NC
cluster_contig13627	-3.25744	9.66e-11	NC	-4.66975	2.06e-20	DOWN	1.42675	0.00127307	NC	COL1A1	collagen, type I, alpha
cluster_contig1363	1.82649	1.52e-05	UP	0.26268	0.658127	NC	1.57151	0.000235005	UP	MRP7_HUMAN	Multidrug resistance-associated protein 7
cluster_contig13630	-1.15393	0.0138422	DOWN	-2.5995	3.67e-09	DOWN	1.45772	0.000939368	UP
cluster_contig13631	1.49034	0.0107553	NC	1.33592	0.0437061	UP	0	1	NC	GATB_CULQU	Glutamyl-tRNA(Gln) amidotransferase subunit B, mitochondrial {ECO:0000255|HAMAP-Rule:MF_03147}
cluster_contig13641	-0.615071	0.200793	NC	0.759465	0.116321	NC	-1.36769	0.0017457	DOWN	RERG_MOUSE	Ras-related and estrogen-regulated growth inhibitor
cluster_contig13645	-1.07714	0.0160151	DOWN	-0.661094	0.186973	NC	-0.40355	0.440883	NC	YETS4_HUMAN	YEATS domain-containing protein 4
cluster_contig13646	-0.392841	0.580973	NC	-1.41499	0.00560745	DOWN	1.03457	0.0479508	UP	COPIA_DROME	Copia protein
cluster_contig13651	-0.522186	0.297813	NC	1.03198	0.0301146	UP	-1.54061	0.000519069	DOWN	CD2B2_DROME	CD2 antigen cytoplasmic tail-binding protein 2 homolog
cluster_contig13655	-3.53651	7.63e-13	NC	-2.40308	4.75e-06	NC	-1.12482	0.0114226	DOWN	THUM1_DROME	THUMP domain-containing protein 1 homolog
cluster_contig13661	0.572107	0.36175	NC	-0.541897	0.374717	NC	1.12502	0.0354499	UP	EVE_DROME	Segmentation protein even-skipped
cluster_contig13677	-1.37632	0.00137042	DOWN	-0.944097	0.0401107	NC	-0.419626	0.416925	NC	RS26_DROME	40S ribosomal protein S26
cluster_contig13683	-2.64113	4.53e-07	DOWN	-2.816	7.35e-08	DOWN	0.193152	0.713914	NC	PRKAA_XENLA	Interferon-inducible double-stranded RNA-dependent protein kinase activator A homolog A
cluster_contig13684	-0.0868467	0.906713	NC	-1.0119	0.0410693	DOWN	0.942798	0.0585674	NC	MED16_AEDAE	Mediator of RNA polymerase II transcription subunit 16
cluster_contig13691	-1.84459	0.00273608	DOWN	0	1	NC	-4.37401	4.47e-09	NC	PEN2_DROME	Gamma-secretase subunit pen-2
cluster_contig13696	-8.08668	1.07e-14	NC	-8.82339	6.24e-19	DOWN	0.730514	0.176222	NC	DPEP1_HUMAN	Dipeptidase 1
cluster_contig13702	-0.672835	0.155179	NC	0.450982	0.409546	NC	-1.10671	0.0138631	DOWN	RT31_BOVIN	28S ribosomal protein S31, mitochondrial
cluster_contig13705	1.21901	0.00521285	UP	0.324614	0.568983	NC	0.911177	0.0462684	NC	NRBP_DROME	Nuclear receptor-binding protein homolog
cluster_contig13721	-1.44771	0.00515647	NC	-2.23894	4.8e-06	DOWN	0.80216	0.121234	NC	SCAI_MOUSE	Protein SCAI
cluster_contig13731	8.83259	1.21e-19	UP	-1.3301	0.00373683	NC	10.0767	3.51e-28	NC	RSF1_HUMAN	Remodeling and spacing factor 1
cluster_contig13733	-0.762037	0.10278	NC	0.304299	0.582862	NC	-1.05628	0.0169901	DOWN	DALY_DROME	Division abnormally delayed protein
cluster_contig1374	0.209419	0.746463	NC	-1.32891	0.00535192	DOWN	1.55116	0.000857055	UP	IPO7_MOUSE	Importin-7
cluster_contig13744	-0.86355	0.248172	NC	-1.40171	0.0410838	DOWN	0.544173	0.548384	NC	HS3S5_MOUSE	Heparan sulfate glucosamine 3-O-sulfotransferase 5
cluster_contig13745	0	1	NC	-2.82944	6.67e-07	DOWN	1.75079	0.00096949	UP
cluster_contig13757	-7.68447	2.55e-12	NC	-8.16549	1.08e-14	DOWN	0.488344	0.383423	NC	CND2_XENLA	Condensin complex subunit 2
cluster_contig13759	-1.78472	0.000161466	DOWN	-1.29898	0.0133581	DOWN	-0.480886	0.349982	NC	YF1F_SCHPO	Uncharacterized protein C9E9.15
cluster_contig13760	-0.896224	0.0769499	NC	-1.09073	0.0317345	DOWN	0.198832	0.783313	NC	RPA12_BOVIN	DNA-directed RNA polymerase I subunit RPA12
cluster_contig13763	-0.80249	0.145677	NC	-1.83179	0.000206403	DOWN	1.03384	0.050915	NC	PLCD_BOVIN	1-acyl-sn-glycerol-3-phosphate acyltransferase delta
cluster_contig13764	7.57506	6.76e-12	UP	-0.437719	0.561317	NC	7.92578	2.08e-13	NC	FEN1_ANOGA	Flap endonuclease 1 {ECO:0000255|HAMAP-Rule:MF_03140}
cluster_contig13772	-0.333608	0.533007	NC	2.28258	9.58e-08	UP	-2.60436	1.08e-09	DOWN	RN19A_HUMAN	E3 ubiquitin-protein ligase RNF19A
cluster_contig13776	-1.09181	0.0381376	NC	-1.19404	0.0268766	DOWN	0.102224	0.973085	NC	CP52A_XENLA	Uncharacterized protein C16orf52 homolog A
cluster_contig13784	-1.0802	0.0325039	DOWN	-0.0958415	0.938637	NC	-0.973056	0.0630023	NC
cluster_contig13786	-1.50108	0.000545595	DOWN	0.20509	0.753703	NC	-1.69299	9.37e-05	DOWN	TPBG_HUMAN	Trophoblast glycoprotein
cluster_contig1380	-1.28032	0.0101739	DOWN	-0.930026	0.0773569	NC	-0.334411	0.665973	NC	RBM47_PONAB	RNA-binding protein 47
cluster_contig13804	-7.74828	9.91e-13	DOWN	0	1	NC	-7.64471	5.37e-12	DOWN
cluster_contig13805	0.169813	0.783717	NC	1.46927	0.0101816	UP	-1.28681	0.0359118	DOWN	COLL1_DROME	Collagen alpha chain CG42342
cluster_contig13810	-1.1697	0.00951038	DOWN	-0.331989	0.582271	NC	-0.827366	0.0826883	NC	DERF6_DERFA	Mite allergen Der f 6
cluster_contig13811	-1.0773	0.0235449	DOWN	-0.947227	0.0598311	NC	-0.116879	0.883404	NC	TRYT_DROME	Trypsin theta
cluster_contig13817	-4.0033	2.56e-15	NC	6.30683	2.18e-06	NC	-10.1941	7.23e-28	DOWN	XPO7_CHICK	Exportin-7
cluster_contig13819	-1.3749	0.00143536	DOWN	-0.543479	0.290234	NC	-0.820543	0.0775737	NC	FABP5_CAEEL	Fatty acid-binding protein homolog 5
cluster_contig13820	-1.71943	5.81e-05	DOWN	-1.05009	0.0213799	DOWN	-0.656991	0.176822	NC	RISC_HUMAN	Retinoid-inducible serine carboxypeptidase
cluster_contig13828	-8.02046	2.45e-44	DOWN	0	1	NC	-7.22669	7.63e-40	NC	TRY5_AEDAE	Trypsin 5G1
cluster_contig13831	-3.34472	9.59e-11	DOWN	0	1	NC	-4.95626	4.8e-17	NC	GBB2_DROME	Guanine nucleotide-binding protein subunit beta-2
cluster_contig13860	-0.793147	0.0821758	NC	-1.28926	0.00313132	DOWN	0.508928	0.305099	NC	XP_015119363.1	PREDICTED: apidaecins type 14-like [Diachasma alloeum]
cluster_contig13865	-4.0241	3.05e-11	DOWN	-2.5677	0.000200461	DOWN	-1.44788	0.00366826	DOWN	RP132_FOWPN	DNA-directed RNA polymerase 132 kDa polypeptide
cluster_contig13869	-8.99665	1.2e-20	DOWN	0	1	NC	-3.57535	1.8e-08	NC	SCRT_DROME	Protein scarlet
cluster_contig13882	1.19286	0.0258495	UP	1.10083	0.0423508	UP	0	1	NC	CHIT1_HUMAN	Chitotriosidase-1
cluster_contig13884	1.11887	0.0110986	UP	0.985319	0.0297112	NC	0.133764	0.840873	NC	CHIA_RAT	Acidic mammalian chitinase
cluster_contig13887	0.809597	0.082994	NC	1.09477	0.0201997	UP	-0.26716	0.678591	NC	UTP6_MOUSE	U3 small nucleolar RNA-associated protein 6 homolog
cluster_contig1389	-0.50237	0.320607	NC	1.05835	0.022949	UP	-1.55006	0.00041918	DOWN	ZY11B_MOUSE	Protein zyg-11 homolog B
cluster_contig13896	0.0670825	0.920071	NC	1.32007	0.0026675	UP	-1.24214	0.00455088	DOWN	TMOD_CAEEL	Tropomodulin
cluster_contig13904	-1.64464	0.00351338	DOWN	-1.92124	0.000711237	DOWN	0.27968	0.732006	NC	5HT1R_DROME	5-hydroxytryptamine receptor 1
cluster_contig13913	-0.108918	0.862683	NC	2.05303	3.67e-06	UP	-2.15042	1.04e-06	DOWN	CCDCX_DROME	Coiled-coil domain-containing protein CG32809
cluster_contig13914	0.674915	0.194951	NC	1.1781	0.0436305	UP	-0.485528	0.569851	NC	CCDCX_ANOGA	Coiled-coil domain-containing protein AGAP005037
cluster_contig13915	9.79195	1.37e-26	UP	-0.488419	0.369929	NC	10.1899	4.03e-29	UP	CCDCX_ANOGA	Coiled-coil domain-containing protein AGAP005037
cluster_contig13917	1.3736	0.0436011	UP	2.12329	0.00282562	UP	0	1	NC	CCDCX_ANOGA	Coiled-coil domain-containing protein AGAP005037
cluster_contig13922	1.08437	0.0136404	UP	0.517613	0.313853	NC	0.570941	0.243907	NC	KPC1_DROME	Protein kinase C, brain isozyme
cluster_contig13923	0	1	NC	-4.97374	2.6e-13	NC	8.45482	9.61e-17	UP	RUSD1_DANRE	RNA pseudouridylate synthase domain-containing protein 1
cluster_contig13926	-0.391918	0.493579	NC	2.7411	3.51e-08	UP	-3.12005	2.69e-10	DOWN	SPTN5_HUMAN	Spectrin beta chain, non-erythrocytic 5
cluster_contig13928	9.8489	5.21e-27	UP	2.32005	1.08e-05	NC	7.44152	5.37e-11	NC	EWG_DROME	DNA-binding protein Ewg
cluster_contig13933	-1.22544	0.00480932	DOWN	-0.888875	0.0554831	NC	-0.318598	0.560191	NC	RL40_CAEEL	Ubiquitin-60S ribosomal protein L40
cluster_contig13936	1.44396	0.00963252	UP	1.16168	0.0200269	NC	0.286163	0.883402	NC	PRPK_MOUSE	TP53-regulating kinase
cluster_contig13939	1.12643	0.0118449	NC	-1.20382	0.00697338	DOWN	2.35208	3.98e-08	NC	PA2_APIDO	Phospholipase A2
cluster_contig13943	0.261588	0.767961	NC	-0.800663	0.137318	NC	1.06976	0.0479508	UP	TSL_DROME	Torso-like protein
cluster_contig1395	1.08614	0.0252324	UP	0.804565	0.169312	NC	0.296836	0.574572	NC	ITBN_DROME	Integrin beta-nu
cluster_contig13950	-1.10321	0.0130817	DOWN	-0.822566	0.0839621	NC	-0.270339	0.636262	NC	TAF12_MOUSE	Transcription initiation factor TFIID subunit 12
cluster_contig13976	0.393455	0.58241	NC	2.72752	1.84e-05	NC	-2.31795	0.000542048	DOWN	RL33A_YEAST	60S ribosomal protein L33-A
cluster_contig13983	-2.04107	0.000179814	DOWN	-2.08835	0.000122072	DOWN	0.0654847	0.849305	NC	TDG_HUMAN	G/T mismatch-specific thymine DNA glycosylase
cluster_contig13984	0	1	NC	-8.85778	3.12e-19	DOWN	4.218	5.82e-13	NC	AGT2L_DROME	Alanine--glyoxylate aminotransferase 2-like
cluster_contig13987	-0.932474	0.0817801	NC	7.49911	2.8e-11	UP	-8.31299	6.57e-16	DOWN	CO061_MOUSE	Uncharacterized protein C15orf61 homolog
cluster_contig13998	-2.4767	4.32e-08	DOWN	-0.11891	0.989881	NC	-2.34253	8e-08	DOWN	PRI1_MOUSE	DNA primase small subunit
cluster_contig14	-1.66517	8.93e-05	DOWN	-0.447172	0.414324	NC	-1.2051	0.00557299	DOWN	VATC_MANSE	V-type proton ATPase subunit C
cluster_contig14001	1.18133	0.0098525	UP	1.10615	0.0195472	UP	0.0954726	0.89771	NC	NBEA_DROME	Neurobeachin
cluster_contig14002	-0.878932	0.056812	NC	0.180848	0.778417	NC	-1.05056	0.0200915	DOWN	LIP3_DROME	Lipase 3
cluster_contig14004	-1.97485	7.38e-06	DOWN	-1.21148	0.0105416	DOWN	-0.747198	0.123089	NC	DNS2B_HUMAN	Deoxyribonuclease-2-beta
cluster_contig1401	0.400741	0.451107	NC	1.09293	0.0187862	UP	-0.67865	0.171615	NC	PM34_HUMAN	Peroxisomal membrane protein PMP34
cluster_contig14011	-1.21453	0.0391354	DOWN	-1.55457	0.00600823	DOWN	0.353803	0.602787	NC
cluster_contig1402	-1.13968	0.0190224	DOWN	-0.277476	0.710457	NC	-0.846996	0.109365	NC
cluster_contig14026	0.367965	0.50647	NC	1.49325	0.000678739	UP	-1.115	0.0136066	DOWN	TPC13_DANRE	Trafficking protein particle complex subunit 13
cluster_contig14035	1.69732	0.00724835	UP	-1.13608	0.029104	DOWN	2.8433	5.04e-07	UP	DOA_DROME	Serine/threonine-protein kinase Doa
cluster_contig1404	0.201882	0.770393	NC	-2.40876	7.21e-08	DOWN	2.63005	4.63e-09	UP	FUTSC_DROME	Microtubule-associated protein futsch
cluster_contig14046	-1.41968	0.00469054	DOWN	0	1	NC	-0.778049	0.192268	NC	SCRIB_DANRE	Protein scribble homolog
cluster_contig14047	-1.81711	0.000120093	DOWN	-0.642332	0.33709	NC	-1.15571	0.0113113	NC	TAF11_DROME	Transcription initiation factor TFIID subunit 11
cluster_contig14050	0.181387	0.765534	NC	2.44198	6.69e-08	UP	-2.2441	6.13e-07	DOWN	DPOLZ_HUMAN	DNA polymerase zeta catalytic subunit
cluster_contig14052	-2.45243	7.4e-06	DOWN	-1.1935	0.081447	NC	-1.2434	0.0177985	DOWN
cluster_contig14059	0.16104	0.800941	NC	1.23171	0.00621048	UP	-1.06294	0.0183829	DOWN	ABHDB_BOVIN	Alpha/beta hydrolase domain-containing protein 11
cluster_contig14063	-0.564435	0.253027	NC	0.619903	0.217748	NC	-1.17	0.00861574	DOWN
cluster_contig14066	-2.34684	5.33e-08	NC	-0.343037	0.608864	NC	-1.99216	2.53e-06	DOWN	ZN157_HUMAN	Zinc finger protein 157
cluster_contig14068	-0.253215	0.648694	NC	-1.19081	0.00699796	DOWN	0.9454	0.0356074	NC	F151B_HUMAN	Protein FAM151B
cluster_contig14070	1.11094	0.0119605	UP	-0.824225	0.0784584	NC	1.94686	4.36e-06	UP	HUWE1_HUMAN	E3 ubiquitin-protein ligase HUWE1
cluster_contig14074	-0.726403	0.130137	NC	0.495211	0.417939	NC	-1.21141	0.0115257	DOWN
cluster_contig14075	-0.356795	0.532187	NC	0.718851	0.236376	NC	-1.06861	0.0463651	DOWN
cluster_contig1409	1.03523	0.0244878	UP	0.222827	0.716341	NC	0.823704	0.090606	NC	AKTIP_DANRE	AKT-interacting protein
cluster_contig14094	0.979502	0.0414979	NC	-0.279319	0.63682	NC	1.269	0.00626568	UP	RPC3_MOUSE	DNA-directed RNA polymerase III subunit RPC3
cluster_contig14095	-1.17348	0.0132275	DOWN	-0.859065	0.0877047	NC	-0.302746	0.658742	NC	LRCH3_HUMAN	Leucine-rich repeat and calponin homology domain-containing protein 3
cluster_contig141	0.591686	0.241626	NC	-0.634754	0.210033	NC	1.23641	0.00631481	UP	MBTP2_CRIGR	Membrane-bound transcription factor site-2 protease
cluster_contig14112	-1.5602	0.000470522	DOWN	0.239387	0.658036	NC	-1.78863	3.34e-05	DOWN	SPF30_DANRE	Survival of motor neuron-related-splicing factor 30
cluster_contig14119	-1.26666	0.00571089	DOWN	-0.507045	0.374717	NC	-0.746648	0.125807	NC	SYAM_DROME	Alanine--tRNA ligase, mitochondrial {ECO:0000255|HAMAP-Rule:MF_03133}
cluster_contig14124	-1.04728	0.0589592	NC	-1.46701	0.00643272	DOWN	0.424552	0.543025	NC	CIDEB_HUMAN	Cell death activator CIDE-B
cluster_contig14130	-1.66536	0.000127844	DOWN	-1.34005	0.00293102	DOWN	-0.304862	0.592509	NC	RNF31_HUMAN	E3 ubiquitin-protein ligase RNF31
cluster_contig14137	-1.02049	0.0212458	DOWN	-0.800639	0.0904057	NC	-0.219288	0.701436	NC	CP6K1_BLAGE	Cytochrome P450 6k1
cluster_contig14139	0	1	NC	-2.11254	0.000170608	NC	1.23825	0.0396183	UP
cluster_contig14142	-1.77723	0.00139364	DOWN	0	1	NC	-2.37367	6.15e-05	DOWN
cluster_contig14153	-0.392143	0.468053	NC	0.663492	0.175695	NC	-1.0451	0.0207155	DOWN	VPS29_MOUSE	Vacuolar protein sorting-associated protein 29
cluster_contig14158	-1.16631	0.0105878	DOWN	-1.19431	0.00984494	DOWN	0.0445214	0.942886	NC	EFCB1_XENLA	EF-hand calcium-binding domain-containing protein 1
cluster_contig1416	1.23313	0.00496366	UP	-0.0838769	0.910978	NC	1.33101	0.00239026	UP	ZNF84_HUMAN	Zinc finger protein 84
cluster_contig14162	-1.78783	0.000540434	DOWN	0.00805481	1	NC	-1.77686	0.000506892	NC	NRF6_CAEEL	Nose resistant to fluoxetine protein 6
cluster_contig14164	-10.6545	3.19e-33	DOWN	0	1	NC	-10.5497	1.19e-30	DOWN	DCP1B_MOUSE	mRNA-decapping enzyme 1B
cluster_contig14169	-1.22886	0.00803444	DOWN	0.167501	0.846647	NC	-1.39183	0.00329808	DOWN
cluster_contig14177	-0.268518	0.627403	NC	-1.2771	0.00354376	DOWN	1.01599	0.0224799	UP	MMEL1_MOUSE	Membrane metallo-endopeptidase-like 1
cluster_contig14188	-0.985246	0.0308894	NC	0.225748	0.778889	NC	-1.19835	0.0112991	DOWN	SEM5A_HUMAN	Semaphorin-5A
cluster_contig14191	1.42723	0.00183431	UP	0.385526	0.506506	NC	1.05151	0.03082	UP	GTR1_PIG	Solute carrier family 2, facilitated glucose transporter member 1
cluster_contig14199	-1.5357	0.000816228	DOWN	-1.60224	0.000524731	DOWN	0.0792196	0.908288	NC	EAA3_BOVIN	Excitatory amino acid transporter 3
cluster_contig14203	-0.373528	0.475178	NC	0.692098	0.154269	NC	-1.05968	0.0172064	DOWN	BAB1_DROME	Protein bric-a-brac 1
cluster_contig14205	-7.46017	4.05e-11	NC	-7.37385	4.24e-10	DOWN	-0.089336	0.868384	NC	APOD_HUMAN	Apolipoprotein D
cluster_contig14208	-1.00335	0.0329655	NC	9.66473	8.46e-24	NC	-10.5575	1.08e-30	DOWN	ADA12_MOUSE	Disintegrin and metalloproteinase domain-containing protein 12
cluster_contig14214	-1.48165	0.00679759	DOWN	-0.806091	0.279442	NC	-0.658105	0.257775	NC	MD2L2_RAT	Mitotic spindle assembly checkpoint protein MAD2B
cluster_contig14223	1.05058	0.0192128	UP	1.91682	6.79e-06	NC	-0.865366	0.0571152	NC	GYS_DROME	Glycogen [starch] synthase
cluster_contig14224	-1.36322	0.00336803	DOWN	-1.73852	0.000139713	DOWN	0.390042	0.463108	NC	IF2B1_CHICK	Insulin-like growth factor 2 mRNA-binding protein 1
cluster_contig1423	0.385855	0.45908	NC	12.0113	2.39e-42	NC	-11.5098	2.29e-38	DOWN	MTA3_MOUSE	Metastasis-associated protein MTA3
cluster_contig14234	1.08903	0.0135694	UP	0.310677	0.587767	NC	0.788069	0.0913063	NC	KI20A_MOUSE	Kinesin-like protein KIF20A
cluster_contig14242	0.123527	0.85363	NC	1.60835	0.000256819	UP	-1.47344	0.000908664	DOWN	ASO_CUCSA	L-ascorbate oxidase
cluster_contig14249	-1.40745	0.00327277	DOWN	-1.86681	6.89e-05	DOWN	0.472244	0.398134	NC
cluster_contig1425	-0.644175	0.261029	NC	0.781605	0.14152	NC	-1.41459	0.00364704	DOWN	DIHR_ACHDO	Diuretic hormone receptor
cluster_contig14251	1.51142	0.00294419	UP	2.03717	1.93e-05	NC	-0.518882	0.352949	NC	ARHL2_MOUSE	Poly(ADP-ribose) glycohydrolase ARH3
cluster_contig14254	-0.356114	0.579334	NC	-1.22623	0.0229667	DOWN	0.874242	0.143025	NC
cluster_contig14263	-0.831536	0.0700878	NC	0.570895	0.251625	NC	-1.39977	0.00112126	DOWN	DYST_HUMAN	Dystonin
cluster_contig14266	0.0742869	0.914289	NC	1.61791	0.000426851	UP	-1.53735	0.000837102	DOWN
cluster_contig14267	-0.979197	0.0365589	NC	-1.0993	0.0180848	DOWN	0.131214	0.832691	NC	IYD1_PONAB	Iodotyrosine dehalogenase 1
cluster_contig14271	0.0654873	0.923569	NC	-1.08742	0.0207267	DOWN	1.16183	0.0119747	UP	SIVA_MOUSE	Apoptosis regulatory protein Siva
cluster_contig14272	-1.16711	0.00847858	DOWN	-0.887901	0.059262	NC	-0.263963	0.651751	NC	ALKB6_DANRE	Alpha-ketoglutarate-dependent dioxygenase alkB homolog 6
cluster_contig14277	1.03339	0.0546001	NC	-0.5484	0.340538	NC	1.59372	0.00144832	UP	RBM38_XENTR	RNA-binding protein 38
cluster_contig14281	-0.267466	0.633411	NC	-1.0331	0.0228787	DOWN	0.774634	0.0969758	NC	CRB_DROME	Protein crumbs
cluster_contig14293	1.20079	0.0391354	UP	1.1395	0.0318361	NC	0.0745927	1	NC	LIPK_MOUSE	Lipase member K
cluster_contig14295	-1.88034	1.51e-05	DOWN	-0.958562	0.0441242	NC	-0.905632	0.0618906	NC
cluster_contig14300	-1.49307	0.000665636	DOWN	-0.611385	0.242763	NC	-0.870023	0.063219	NC	XP_011313397.1	PREDICTED: uncharacterized protein LOC105272863 [Fopius arisanus]
cluster_contig14302	1.14033	0.0473492	UP	0.104456	0.876	NC	1.0458	0.105744	NC
cluster_contig14307	-1.13812	0.0143315	NC	-2.37738	5.94e-08	DOWN	1.25288	0.00497064	NC	CD109_HUMAN	CD109 antigen
cluster_contig14309	-1.27313	0.00435149	DOWN	-0.415955	0.48365	NC	-0.849722	0.0663149	NC	MIC1_MOUSE	Uncharacterized protein C18orf8 homolog
cluster_contig14313	-0.929937	0.0556102	NC	0.529753	0.389416	NC	-1.45444	0.00253094	DOWN	ATAT_ANOGA	Alpha-tubulin N-acetyltransferase {ECO:0000255|HAMAP-Rule:MF_03130}
cluster_contig14321	-1.78354	0.000147315	DOWN	-0.0670455	0.910888	NC	-1.70122	0.000724865	DOWN	SORL_RABIT	Sortilin-related receptor
cluster_contig14335	-1.14906	0.00863178	DOWN	-0.141633	0.834044	NC	-1.00122	0.0254955	DOWN	NEDD4_MOUSE	E3 ubiquitin-protein ligase NEDD4
cluster_contig1434	-1.01886	0.0209795	DOWN	-0.801476	0.0874801	NC	-0.210546	0.716188	NC	5NTC_PONAB	Cytosolic purine 5'-nucleotidase
cluster_contig1435	3.3862	1.65e-12	NC	10.3459	6.09e-29	UP	-6.85174	2.7e-08	NC	MOCOS_BOMMO	Molybdenum cofactor sulfurase {ECO:0000255|HAMAP-Rule:MF_03050}
cluster_contig14358	-0.410307	0.434728	NC	0.936055	0.0563375	NC	-1.33973	0.00318742	DOWN
cluster_contig14360	9.94867	8.7e-28	UP	4.29653	6.94e-17	NC	0	1	NC	WNK3_MOUSE	Serine/threonine-protein kinase WNK3
cluster_contig14364	-1.09015	0.0174341	DOWN	-2.05464	2.44e-06	DOWN	0.976487	0.0325059	NC	RIR2_DROME	Ribonucleoside-diphosphate reductase subunit M2
cluster_contig14365	-2.60971	1.98e-06	DOWN	-1.98602	0.00168707	NC	-0.623602	0.206436	NC	ECE1_RAT	Endothelin-converting enzyme 1
cluster_contig14366	0	1	NC	-1.61051	0.0083057	DOWN	0.420185	0.618462	NC
cluster_contig1438	-1.50278	0.00110414	NC	0.0302567	0.957076	NC	-1.52436	0.00076486	DOWN	HSF_DROME	Heat shock factor protein
cluster_contig14380	-2.56315	1.57e-08	DOWN	-2.61659	9.08e-09	DOWN	0.0627667	0.937028	NC	XP_011307373.1	PREDICTED: uncharacterized protein LOC105269080 [Fopius arisanus]
cluster_contig14386	-0.863217	0.0703866	NC	0.707949	0.175102	NC	-1.56681	0.000547691	DOWN	SPS1_DROME	Selenide, water dikinase
cluster_contig14402	1.57945	0.0308851	UP	-1.37543	0.016805	DOWN	2.96636	7.69e-07	UP	YCX91_PHAAO	Uncharacterized protein ORF91
cluster_contig14407	0	1	NC	-4.4084	9.32e-17	NC	10.1326	1.01e-28	UP	TRR_DROME	Histone-lysine N-methyltransferase trr
cluster_contig14416	-9.42311	9.23e-24	DOWN	0	1	NC	-9.31942	2.3e-21	DOWN	LIN52_CHICK	Protein lin-52 homolog
cluster_contig14422	0.292968	0.592867	NC	1.01611	0.0283624	UP	-0.709259	0.145218	NC	LFG1_HUMAN	Protein lifeguard 1
cluster_contig14424	2.66199	1.57e-08	NC	9.58619	3.36e-23	UP	-6.80857	5.27e-08	NC	MSIR6_DROME	RNA-binding protein Musashi homolog Rbp6 {ECO:0000250|UniProtKB:Q920Q6, ECO:0000303|PubMed:8417324}
cluster_contig14426	1.26869	0.00411246	UP	1.06511	0.017132	UP	0.209249	0.766993	NC	MSIR6_DROME	RNA-binding protein Musashi homolog Rbp6 {ECO:0000250|UniProtKB:Q920Q6, ECO:0000303|PubMed:8417324}
cluster_contig14427	1.18384	0.00683022	UP	0.889212	0.0555347	NC	0.305346	0.584417	NC	MSIR6_DROME	RNA-binding protein Musashi homolog Rbp6 {ECO:0000250|UniProtKB:Q920Q6, ECO:0000303|PubMed:8417324}
cluster_contig1443	3.57703	1.8e-14	UP	2.62622	1.59e-09	UP	0.955781	0.116762	NC	COL3A1	collagen, type III, alpha
cluster_contig14433	-1.48406	0.00328822	DOWN	-0.890205	0.136171	NC	-0.582121	0.290971	NC	P3A2_STRPU	DNA-binding protein P3A2
cluster_contig14443	-1.08054	0.0642297	NC	0	1	NC	-1.56525	0.0289441	DOWN	PTN23_HUMAN	Tyrosine-protein phosphatase non-receptor type 23
cluster_contig14452	-1.91138	9.94e-05	DOWN	-1.21659	0.029104	DOWN	-0.68253	0.188211	NC	GP143_MOUSE	G-protein coupled receptor 143
cluster_contig14458	-0.724539	0.119446	NC	0.57988	0.248413	NC	-1.30079	0.00268295	DOWN	HSDL2_XENLA	Hydroxysteroid dehydrogenase-like protein 2
cluster_contig14464	-1.48081	0.000532563	DOWN	0.319627	0.583479	NC	-1.79248	2.48e-05	DOWN	SMO_DROME	Protein smoothened
cluster_contig14467	-0.851972	0.227155	NC	-2.24234	3.01e-05	DOWN	1.3977	0.00666677	UP	TRAIP_MOUSE	E3 ubiquitin-protein ligase TRAIP
cluster_contig14470	0.324969	0.578038	NC	-1.06479	0.0233923	DOWN	1.3991	0.00203449	UP	MICU3_MOUSE	Calcium uptake protein 3, mitochondrial
cluster_contig14474	-1.33686	0.00262291	DOWN	-0.391229	0.48672	NC	-0.928391	0.0535132	NC	MTH2_DROYA	G-protein coupled receptor Mth2
cluster_contig14480	1.1756	0.0721016	NC	-1.34378	0.00846953	DOWN	2.52622	2.2e-06	NC	UBE3A_HUMAN	Ubiquitin-protein ligase E3A
cluster_contig1449	-1.3523	0.00178347	DOWN	0.448394	0.399367	NC	-1.79075	2.51e-05	DOWN	NDUAA_DROME	NADH dehydrogenase [ubiquinone] 1 alpha subcomplex subunit 10, mitochondrial
cluster_contig14509	1.37819	0.0020123	UP	1.08311	0.0184232	UP	0.308209	0.614414	NC	FXRD1_XENLA	FAD-dependent oxidoreductase domain-containing protein 1
cluster_contig14510	0.375755	0.51491	NC	-2.26777	1.97e-07	DOWN	2.64925	1.78e-09	UP	FXRD1_XENLA	FAD-dependent oxidoreductase domain-containing protein 1
cluster_contig14513	-0.341435	0.536884	NC	1.04657	0.0248433	UP	-1.3846	0.00175374	DOWN
cluster_contig14524	0	1	NC	-7.09042	8.48e-09	DOWN	6.84056	1.4e-08	NC	NADK_MOUSE	NAD kinase
cluster_contig14525	0.41476	0.556841	NC	8.0155	9.08e-13	UP	-7.4887	3.17e-11	DOWN	NADK_MOUSE	NAD kinase
cluster_contig1456	-1.68253	0.00261929	DOWN	-1.17634	0.0639561	NC	-0.496753	0.421098	NC	HCD2_DROME	3-hydroxyacyl-CoA dehydrogenase type-2
cluster_contig14564	-0.698902	0.147078	NC	-1.63751	0.000184916	DOWN	0.945699	0.0421232	NC	DYN_DROME	Dynamin
cluster_contig14578	0	1	NC	-1.79278	0.000839274	DOWN	1.76926	0.00138855	UP
cluster_contig14586	-1.61364	0.000532927	DOWN	-0.0568604	1	NC	-1.54582	0.000812448	DOWN	XP_015111616.1	PREDICTED: venom acid phosphatase Acph-1-like [Diachasma alloeum]
cluster_contig14589	-0.132854	0.839652	NC	1.01862	0.0648162	NC	-1.13617	0.0328322	DOWN
cluster_contig14595	0	1	NC	-8.4112	3.23e-16	DOWN	2.70176	1.14e-06	NC
cluster_contig14605	1.34965	0.00296947	UP	-0.185298	0.79213	NC	1.54917	0.00059267	UP	HTH_DROME	Homeobox protein homothorax
cluster_contig14608	1.74059	4.55e-05	UP	0.868687	0.0618566	NC	0.877217	0.0591876	NC	CL065_HUMAN	Probable peptide chain release factor C12orf65, mitochondrial
cluster_contig14613	7.05577	2.82e-09	UP	-1.58266	0.00256193	NC	8.53821	4.21e-17	NC	BEST2_HUMAN	Bestrophin-2
cluster_contig14620	-4.38266	2.63e-18	NC	0	1	NC	-10.1911	7.62e-28	DOWN	EIF3C_AEDAE	Eukaryotic translation initiation factor 3 subunit C {ECO:0000255|HAMAP-Rule:MF_03002}
cluster_contig14627	0	1	NC	-1.35578	0.0118553	DOWN	0.889229	0.121912	NC	TTLL2_HUMAN	Probable tubulin polyglutamylase TTLL2
cluster_contig1463	1.3961	0.00109765	UP	0.408209	0.44998	NC	1.00303	0.0246914	UP	C56D2_HUMAN	Cytochrome b561 domain-containing protein 2
cluster_contig14638	1.00018	0.0262457	UP	0.133804	0.845537	NC	0.87709	0.0582691	NC	PUM_DROME	Maternal protein pumilio
cluster_contig14651	-2.0897	1.42e-06	DOWN	-1.83755	3.05e-05	DOWN	-0.237288	0.691438	NC	NADE_DROME	Probable glutamine-dependent NAD(+) synthetase
cluster_contig14654	-7.60008	6.76e-12	DOWN	-7.84588	9.35e-13	NC	0.247891	0.821628	NC	CDC23_BOVIN	Cell division cycle protein 23 homolog
cluster_contig14656	-2.42889	9.65e-09	NC	-0.528446	0.30503	NC	-1.89278	8.93e-06	DOWN	AMPN_MANSE	Aminopeptidase N
cluster_contig14660	-1.83429	1.7e-05	DOWN	-2.08356	1.08e-06	DOWN	0.26183	0.64413	NC	CP4C1_BLADI	Cytochrome P450 4C1
cluster_contig14661	0.874536	0.0689854	NC	3.13883	7.97e-12	UP	-2.25189	1.04e-06	DOWN	ZFYV1_HUMAN	Zinc finger FYVE domain-containing protein 1
cluster_contig14668	0.448446	0.414359	NC	-0.563006	0.309957	NC	1.01883	0.0352686	UP
cluster_contig14672	-0.407669	0.456971	NC	-1.37415	0.00273416	DOWN	0.970096	0.0421559	NC	L2GL1_MOUSE	Lethal(2) giant larvae protein homolog 1
cluster_contig14684	0.484116	0.428943	NC	-1.73788	0.000320175	DOWN	2.23141	3.27e-06	NC	WDR7_HUMAN	WD repeat-containing protein 7
cluster_contig14685	0.17138	0.779567	NC	-2.38476	6.03e-08	DOWN	2.56491	5.36e-09	NC	WDR7_HUMAN	WD repeat-containing protein 7
cluster_contig14688	1.38231	0.00182792	UP	-0.318789	0.590935	NC	1.70984	9.37e-05	UP	WDR7_HUMAN	WD repeat-containing protein 7
cluster_contig14695	-1.07322	0.0396352	DOWN	0.310376	0.738253	NC	-1.36639	0.0115687	DOWN
cluster_contig147	-3.1913	5.34e-13	DOWN	-0.850401	0.114996	NC	-2.33346	3.71e-08	DOWN	T184C_XENLA	Transmembrane protein 184C
cluster_contig1470	-1.04607	0.0458006	DOWN	0.114784	0.829487	NC	-1.15243	0.0190678	DOWN	HS2ST_DROME	Heparin sulfate O-sulfotransferase
cluster_contig14713	-1.37521	0.00971711	DOWN	-1.76145	0.000699269	DOWN	0.398812	0.527628	NC
cluster_contig1473	0.309839	0.566963	NC	1.06729	0.0169583	UP	-0.74895	0.106533	NC	XP_015124532.1	PREDICTED: dentin sialophosphoprotein-like [Diachasma alloeum]
cluster_contig14730	-0.682367	0.190927	NC	0.46	0.446782	NC	-1.12518	0.0208076	DOWN	GNS_MOUSE	N-acetylglucosamine-6-sulfatase
cluster_contig14732	-1.14942	0.0109674	DOWN	-0.378989	0.512265	NC	-0.759417	0.117694	NC	MAB21_DROPS	Protein mab-21
cluster_contig14739	0.544851	0.459858	NC	7.16573	1.35e-09	UP	0	1	NC	DTNB_MOUSE	Dystrobrevin beta
cluster_contig1474	1.14578	0.0175665	UP	0.0376837	0.911827	NC	1.11659	0.0296085	UP
cluster_contig14741	-3.34711	4.67e-09	DOWN	0	1	NC	-1.85674	0.000127947	DOWN	SMOX_MOUSE	Spermine oxidase
cluster_contig14742	-0.383724	0.468321	NC	0.663698	0.20992	NC	-1.0383	0.0271631	DOWN
cluster_contig14743	1.44434	0.00102251	UP	0.950883	0.0363841	NC	0.498457	0.370475	NC	FR1OP_MACFA	FGFR1 oncogene partner
cluster_contig14752	-0.762011	0.136641	NC	0.295494	0.638683	NC	-1.05304	0.0311448	DOWN	TOPK_DANRE	Lymphokine-activated killer T-cell-originated protein kinase homolog
cluster_contig14761	-1.2985	0.00286675	DOWN	0.390088	0.465041	NC	-1.68491	7.45e-05	DOWN	DPYD_RAT	Dihydropyrimidine dehydrogenase [NADP(+)]
cluster_contig14768	0	1	NC	-1.25348	0.0318518	DOWN	0.689273	0.250037	NC	TTF2_DROME	Transcription termination factor 2
cluster_contig14769	6.98637	3.83e-09	UP	1.60144	0.00671284	UP	0	1	NC	IKKA_XENLA	Inhibitor of nuclear factor kappa-B kinase subunit alpha
cluster_contig14772	-8.06525	1.61e-14	DOWN	-8.37417	5.5e-16	DOWN	0.30852	0.569851	NC	5HTR_HELVI	5-hydroxytryptamine receptor
cluster_contig14777	1.10942	0.0285023	UP	0.278567	0.608446	NC	0.842266	0.146336	NC	MACO2_DANRE	Macoilin-2 {ECO:0000312|EMBL:AAX11928.1}
cluster_contig14785	-0.0476622	0.943166	NC	1.62492	0.000194527	UP	-1.66195	0.000122336	DOWN	RT02_HUMAN	28S ribosomal protein S2, mitochondrial
cluster_contig1479	-0.345453	0.521062	NC	-1.0362	0.0228722	DOWN	0.70026	0.141239	NC	COX15_HUMAN	Cytochrome c oxidase assembly protein COX15 homolog
cluster_contig14791	1.54654	0.000668756	NC	1.33871	0.00257637	UP	0.219115	0.818883	NC	LPHN_DROAN	Latrophilin Cirl {ECO:0000250|UniProtKB:A1Z7G7}
cluster_contig14792	1.13254	0.0273711	UP	-0.495295	0.376773	NC	1.63925	0.000700585	UP	LPHN_DROAN	Latrophilin Cirl {ECO:0000250|UniProtKB:A1Z7G7}
cluster_contig14800	-1.21382	0.0112861	DOWN	-0.157119	0.905454	NC	-1.04935	0.0234734	DOWN	VA727_ARATH	Vesicle-associated membrane protein 727
cluster_contig14801	2.75236	3.83e-09	UP	1.71884	0.000249382	UP	1.04594	0.0564422	NC	CLOCK_DROME	Circadian locomoter output cycles protein kaput
cluster_contig14822	-0.63231	0.193795	NC	-1.09688	0.0158241	DOWN	0.481059	0.344767	NC	SH2D3_HUMAN	SH2 domain-containing protein 3C
cluster_contig14823	-0.663086	0.169579	NC	0.831813	0.0934054	NC	-1.4848	0.000875907	DOWN	PAN2_CHICK	PAB-dependent poly(A)-specific ribonuclease subunit PAN2 {ECO:0000255|HAMAP-Rule:MF_03182}
cluster_contig14825	-1.27691	0.0047623	DOWN	-0.995414	0.0385979	NC	-0.267768	0.648079	NC	RPB11_DROME	DNA-directed RNA polymerase II subunit RPB11
cluster_contig14826	-1.46537	0.00069412	DOWN	-0.907887	0.05414	NC	-0.547526	0.264998	NC	PELO_DROME	Protein pelota
cluster_contig14838	0	1	NC	-1.9367	0.000318342	DOWN	4.41869	3.73e-10	UP
cluster_contig14839	-0.606599	0.206712	NC	0.418234	0.441439	NC	-1.02088	0.0227602	DOWN	SL9B2_MOUSE	Mitochondrial sodium/hydrogen exchanger 9B2
cluster_contig14840	0.103848	0.935111	NC	-2.26145	3.97e-06	DOWN	2.38521	1.31e-06	NC
cluster_contig14855	-1.50922	0.000508857	DOWN	-2.28503	9.67e-08	DOWN	0.789198	0.0893807	NC	MBOA1_MOUSE	Lysophospholipid acyltransferase 1
cluster_contig14859	-1.06359	0.0162427	DOWN	-0.219188	0.725672	NC	-0.83749	0.069288	NC	ERGI2_DANRE	Endoplasmic reticulum-Golgi intermediate compartment protein 2
cluster_contig1486	-0.268866	0.630693	NC	-1.01136	0.0265065	DOWN	0.756012	0.107879	NC	P85AA_XENLA	Phosphatidylinositol 3-kinase regulatory subunit alpha
cluster_contig14864	1.6326	0.000356408	UP	1.52467	0.00104121	UP	0.120943	0.885448	NC	KCTD5_MOUSE	BTB/POZ domain-containing protein KCTD5
cluster_contig14866	-0.963821	0.0344421	NC	10.0231	1.92e-26	UP	-10.8775	3.09e-33	DOWN	PB1_HUMAN	Protein polybromo-1
cluster_contig14876	-1.49763	0.00199728	DOWN	-0.934743	0.089613	NC	-0.547917	0.334473	NC	CA2D3_HUMAN	Voltage-dependent calcium channel subunit alpha-2/delta-3
cluster_contig14889	1.40827	0.0094917	NC	7.82079	9.33e-12	UP	0	1	NC
cluster_contig14893	-1.54858	0.00120861	DOWN	-0.791959	0.156174	NC	-0.744301	0.172422	NC	ALKB1_MOUSE	Alkylated DNA repair protein alkB homolog 1
cluster_contig14895	-0.821652	0.124426	NC	0.287328	0.698317	NC	-1.10136	0.0392277	DOWN
cluster_contig14896	-7.72881	1.59e-12	DOWN	0	1	NC	-7.62211	6.87e-12	DOWN	LSAMP_HUMAN	Limbic system-associated membrane protein
cluster_contig1490	0.24461	0.723402	NC	-0.82031	0.109647	NC	1.08067	0.0315964	UP	NRF6_CAEEL	Nose resistant to fluoxetine protein 6
cluster_contig14909	-1.01361	0.022636	DOWN	-0.347369	0.543255	NC	-0.655413	0.168451	NC	PUF68_DROME	Poly(U)-binding-splicing factor half pint
cluster_contig14919	-2.44631	2.43e-05	DOWN	0	1	NC	-1.25031	0.0393631	DOWN	SC5A6_DROME	Putative sodium-dependent multivitamin transporter
cluster_contig1492	0.745746	0.117221	NC	-0.652352	0.189158	NC	1.40901	0.00133819	UP	FANCI_HUMAN	Fanconi anemia group I protein
cluster_contig14927	-0.132413	0.842979	NC	-1.10548	0.0213119	DOWN	0.982122	0.0420394	NC	EST6_APIME	Venom carboxylesterase-6
cluster_contig14931	-2.9985	1.64e-09	NC	6.74191	6.03e-08	NC	-9.62003	1.56e-23	DOWN	ABCGN_DICDI	ABC transporter G family member 23
cluster_contig14932	-1.07326	0.021682	DOWN	0.198894	0.799061	NC	-1.26464	0.0077171	DOWN	CTRB1_LITVA	Chymotrypsin BI
cluster_contig14933	-1.43621	0.00103453	DOWN	0.121501	0.874811	NC	-1.54919	0.000442895	DOWN	CTRC_RAT	Chymotrypsin-C
cluster_contig14946	-1.41407	0.0012349	DOWN	-0.48391	0.377599	NC	-0.917555	0.0450719	NC	RM04_BOVIN	39S ribosomal protein L4, mitochondrial
cluster_contig14953	1.32991	0.00204851	UP	-0.103637	0.885607	NC	1.43893	0.0008317	UP	AUB_DROME	Protein aubergine {ECO:0000312|EMBL:AGA18944.1}
cluster_contig14961	0.581583	0.252695	NC	-0.424814	0.441679	NC	1.01785	0.0290374	UP	PKHA7_DANRE	Pleckstrin homology domain-containing family A member 7
cluster_contig14963	-3.09589	4.35e-09	DOWN	-2.55102	3.98e-06	DOWN	-0.535493	0.398027	NC	RET_RAT	Proto-oncogene tyrosine-protein kinase receptor Ret
cluster_contig14965	-8.15105	4.89e-15	DOWN	0	1	NC	-8.05093	2.51e-14	DOWN	RUSD1_DANRE	RNA pseudouridylate synthase domain-containing protein 1
cluster_contig14966	-1.3513	0.0136634	NC	-1.64755	0.00177174	DOWN	0.314499	0.605251	NC
cluster_contig14970	-1.02351	0.0224912	DOWN	-0.24218	0.702057	NC	-0.769277	0.10003	NC	CABL1_HUMAN	CDK5 and ABL1 enzyme substrate 1
cluster_contig14973	1.56593	0.0144154	UP	1.16168	0.133033	NC	0	1	NC
cluster_contig14978	-8.41993	9.07e-17	NC	-10.303	8.31e-30	DOWN	1.88687	3.2e-05	NC	AP1S2_MOUSE	AP-1 complex subunit sigma-2
cluster_contig14982	0	1	NC	-1.65769	0.00897417	DOWN	7.60181	1.89e-11	UP
cluster_contig14994	-1.85352	0.000545595	NC	0	1	NC	-2.69771	7.12e-07	DOWN
cluster_contig14999	-1.69607	0.00010077	DOWN	-0.627728	0.233766	NC	-1.05661	0.0207515	DOWN	CLASR_BOVIN	CLK4-associating serine/arginine rich protein
cluster_contig1500	-1.86805	0.000205501	DOWN	-0.21438	0.701032	NC	-1.63505	0.00443834	DOWN
cluster_contig15000	-1.1026	0.0128288	DOWN	-1.09821	0.0150601	DOWN	0.00952896	0.993333	NC	SAC1_MOUSE	Phosphatidylinositide phosphatase SAC1
cluster_contig1501	-2.26303	9.57e-08	DOWN	-1.48639	0.000680692	DOWN	-0.764978	0.101151	NC	CCDC6_HUMAN	Coiled-coil domain-containing protein 6
cluster_contig15018	1.94392	5.93e-06	UP	-0.663995	0.176254	NC	2.61376	1.13e-09	UP	PIP1_DROME	1-phosphatidylinositol 4,5-bisphosphate phosphodiesterase classes I and II
cluster_contig1503	-2.47052	3.26e-05	DOWN	0	1	NC	-7.6397	5.37e-12	DOWN	SAV1_HUMAN	Protein salvador homolog 1
cluster_contig15031	-1.18502	0.0129221	DOWN	-1.27886	0.00846953	DOWN	0.104963	0.898602	NC	RFT1_DROME	Protein RFT1 homolog
cluster_contig15032	0.537408	0.482105	NC	-1.77051	0.00025685	DOWN	2.31924	6.71e-06	NC	RPOM_HUMAN	DNA-directed RNA polymerase, mitochondrial
cluster_contig15040	-1.34073	0.00824917	DOWN	1.67581	0.00458237	UP	-2.99841	2.16e-08	DOWN
cluster_contig15051	1.68617	0.00296056	UP	-0.972556	0.071118	NC	2.66468	4.73e-07	UP	ABCB8_DANRE	ATP-binding cassette sub-family B member 8, mitochondrial
cluster_contig15070	0	1	NC	-3.93321	5.69e-09	NC	7.83076	1.01e-12	UP	MDHM_CAEEL	Probable malate dehydrogenase, mitochondrial
cluster_contig15074	-1.10363	0.0119419	DOWN	0.968877	0.036743	NC	-2.05498	1.29e-06	DOWN	HYOU1_MOUSE	Hypoxia up-regulated protein 1
cluster_contig1508	-2.56458	1.31e-05	DOWN	0	1	NC	-1.76475	0.0101377	NC
cluster_contig15086	1.55026	0.00813282	UP	0.57701	0.408617	NC	0	1	NC	TRET1_BOMMO	Facilitated trehalose transporter Tret1 {ECO:0000303|PubMed:20035867}
cluster_contig15091	-0.283928	0.611173	NC	1.92831	6.59e-06	UP	-2.20095	2.32e-07	DOWN	HTR5A_MOUSE	HEAT repeat-containing protein 5A
cluster_contig15092	0.141956	0.817825	NC	1.63929	0.000266992	UP	-1.48402	0.000999472	DOWN	HTR5B_XENTR	HEAT repeat-containing protein 5B
cluster_contig15094	-1.10577	0.0143642	DOWN	-1.45106	0.00107292	DOWN	0.350152	0.51864	NC	DHDH_XENTR	Trans-1,2-dihydrobenzene-1,2-diol dehydrogenase
cluster_contig15107	-0.825418	0.143981	NC	0.787467	0.265896	NC	-1.60297	0.00519737	DOWN	LIRP_LOCMI	LIRP
cluster_contig1511	0	1	NC	-8.23387	4.12e-15	DOWN	8.13253	1.12e-14	UP	DNLI3_HUMAN	DNA ligase 3
cluster_contig15114	-2.73357	1.72e-10	NC	-3.73138	2.77e-17	NC	1.01911	0.0224883	UP	C6A13_DROME	Probable cytochrome P450 6a13
cluster_contig15118	1.0375	0.0207639	UP	-0.101354	0.889362	NC	1.15216	0.0100884	UP	ECR_AEDAE	Ecdysone receptor
cluster_contig15119	-1.31068	0.00544974	DOWN	-1.39322	0.00340462	DOWN	0.0921559	0.907855	NC
cluster_contig15125	0.737054	0.228779	NC	-0.763555	0.242821	NC	1.50834	0.00721957	UP	EAF6_XENTR	Chromatin modification-related protein MEAF6
cluster_contig15127	0	1	NC	-2.02147	0.000109741	DOWN	1.01974	0.0686115	NC	SYIM_MOUSE	Isoleucine--tRNA ligase, mitochondrial
cluster_contig15129	2.62385	1.29e-07	UP	1.60163	0.00100788	UP	1.03653	0.0907236	NC	VIAAT_XENTR	Vesicular inhibitory amino acid transporter
cluster_contig15137	-2.00331	0.000468363	DOWN	0	1	NC	-1.22504	0.0193281	DOWN	PTN4_HUMAN	Tyrosine-protein phosphatase non-receptor type 4
cluster_contig15139	-0.641081	0.228062	NC	-1.16044	0.0167089	DOWN	0.530424	0.330413	NC
cluster_contig15143	-7.59456	6.76e-12	DOWN	-7.96739	1.27e-13	DOWN	0.375502	0.547696	NC	PAPOG_HUMAN	Poly(A) polymerase gamma
cluster_contig15149	-1.51824	0.000545016	DOWN	-2.10839	1.16e-06	DOWN	0.607033	0.211704	NC	UBA5_BOMMO	Ubiquitin-like modifier-activating enzyme 5
cluster_contig15150	0.122861	0.849968	NC	-1.06199	0.0234885	DOWN	1.18657	0.00945387	NC	UBA5_BOMMO	Ubiquitin-like modifier-activating enzyme 5
cluster_contig15167	-1.48246	0.000561976	DOWN	-1.48273	0.000657382	DOWN	0.0122288	0.992749	NC	RAB6_DROME	Ras-related protein Rab6 {ECO:0000312|EMBL:AAF53168.1}
cluster_contig15169	-4.75703	5.79e-19	NC	-5.97766	8.08e-28	DOWN	1.22988	0.00630044	NC	SUCA_DROME	Succinyl-CoA ligase [ADP/GDP-forming] subunit alpha, mitochondrial
cluster_contig15174	0.739833	0.229433	NC	1.80193	0.00393924	UP	0	1	NC	DPOLQ_HUMAN	DNA polymerase theta
cluster_contig15175	-0.781072	0.119941	NC	0.495698	0.421701	NC	-1.26502	0.0103577	DOWN	NTAN1_HUMAN	Protein N-terminal asparagine amidohydrolase
cluster_contig15184	1.56485	0.000824367	UP	0.268098	0.621968	NC	1.30313	0.00875661	UP	ZN543_HUMAN	Zinc finger protein 543
cluster_contig15186	-2.27914	5.31e-08	DOWN	-1.73999	4.13e-05	DOWN	-0.532414	0.279209	NC	XP_015113360.1	PREDICTED: uncharacterized protein LOC107038652 [Diachasma alloeum]
cluster_contig15199	1.219	0.00578516	UP	1.03118	0.0248224	UP	0.200221	0.742817	NC	MFSD6_PIG	Major facilitator superfamily domain-containing protein 6
cluster_contig15205	0.187122	0.801841	NC	-0.87832	0.0867375	NC	1.0753	0.0323927	UP	MTAP2_RAT	Microtubule-associated protein 2
cluster_contig15210	-0.582333	0.288849	NC	-1.60663	0.000479756	DOWN	1.03427	0.0279503	UP
cluster_contig1522	0.780778	0.0922904	NC	1.19141	0.00819481	UP	-0.398696	0.461291	NC	LACB2_XENLA	Beta-lactamase-like protein 2
cluster_contig15225	-1.78133	0.00193059	DOWN	0	1	NC	-2.27166	0.000379885	DOWN
cluster_contig15226	-1.31192	0.0023817	DOWN	1.20677	0.0067817	UP	-2.51381	3.19e-09	DOWN	TRIPC_RAT	E3 ubiquitin-protein ligase TRIP12
cluster_contig15229	-1.9803	0.000975824	DOWN	0	1	NC	-1.2575	0.0292688	DOWN
cluster_contig15231	-0.815804	0.0926099	NC	-1.14814	0.0143089	DOWN	0.348981	0.532611	NC	TM242_DANRE	Transmembrane protein 242
cluster_contig15247	6.87636	1.88e-08	UP	1.14896	0.241223	NC	0	1	NC	MACD2_XENLA	O-acetyl-ADP-ribose deacetylase MACROD2
cluster_contig15248	-1.02312	0.0203573	DOWN	-0.583203	0.243188	NC	-0.421675	0.412301	NC	PDI_DROME	Protein disulfide-isomerase
cluster_contig15250	-1.22385	0.00730996	DOWN	0.173183	0.815331	NC	-1.38506	0.00249049	DOWN	GATA_AEDAE	Glutamyl-tRNA(Gln) amidotransferase subunit A, mitochondrial {ECO:0000255|HAMAP-Rule:MF_03150}
cluster_contig15253	0.437452	0.495937	NC	-0.757818	0.153277	NC	1.20626	0.0158317	UP	UNC4_DROME	Homeobox protein unc-4
cluster_contig15258	1.17155	0.0070973	UP	-0.196056	0.75497	NC	1.37655	0.00136866	UP	AUB_DROME	Protein aubergine {ECO:0000312|EMBL:AGA18944.1}
cluster_contig1527	1.52801	0.000638235	UP	0.4739	0.3576	NC	1.05568	0.0301349	UP	PKHG4_HUMAN	Puratrophin-1
cluster_contig15284	1.07018	0.0219951	UP	0.91234	0.0532874	NC	0.168945	0.834153	NC	WDR44_BOVIN	WD repeat-containing protein 44
cluster_contig15288	-7.15612	1.14e-09	NC	-7.71977	6.24e-12	DOWN	0.564572	0.485582	NC	LPHN3_HUMAN	Latrophilin-3
cluster_contig15289	-1.07283	0.0195785	DOWN	-0.812219	0.100433	NC	-0.253366	0.676597	NC	LPHN_DROAN	Latrophilin Cirl {ECO:0000250|UniProtKB:A1Z7G7}
cluster_contig15296	-0.778821	0.135844	NC	0.734716	0.389572	NC	-1.4928	0.012858	DOWN	TTC5_HUMAN	Tetratricopeptide repeat protein 5
cluster_contig15301	0.791676	0.101749	NC	-0.682509	0.163166	NC	1.48967	0.000757961	UP	BCAS3_DROME	Breast carcinoma-amplified sequence 3 homolog
cluster_contig15313	-2.06986	1.17e-06	NC	-1.09667	0.0163696	DOWN	-0.954602	0.0377419	NC	MED14_AEDAE	Mediator of RNA polymerase II transcription subunit 14
cluster_contig15314	-2.55049	3.22e-08	DOWN	-3.27541	1.52e-12	DOWN	0.738163	0.127051	NC	AVR2B_XENLA	Activin receptor type-2B
cluster_contig15328	-1.22408	0.0099063	DOWN	-1.66313	0.000311616	DOWN	0.44926	0.40456	NC
cluster_contig15329	-1.23775	0.00411715	DOWN	-0.391145	0.47183	NC	-0.84461	0.0641716	NC	PAHX_HUMAN	Phytanoyl-CoA dioxygenase, peroxisomal
cluster_contig15337	-1.22551	0.00472226	DOWN	-0.976964	0.0319591	NC	-0.250539	0.658898	NC	LRC15_HUMAN	Leucine-rich repeat-containing protein 15
cluster_contig15339	-8.53004	1.75e-17	NC	-8.92162	1.21e-19	DOWN	0.396194	0.489158	NC	DHDH_XENTR	Trans-1,2-dihydrobenzene-1,2-diol dehydrogenase
cluster_contig15341	-2.78271	2.48e-08	DOWN	-1.98668	0.000283454	DOWN	-0.781541	0.119464	NC
cluster_contig15343	-1.11781	0.0104987	DOWN	-0.720689	0.132357	NC	-0.383731	0.464722	NC	MAP2_BOVIN	Methionine aminopeptidase 2 {ECO:0000255|HAMAP-Rule:MF_03175}
cluster_contig15350	0.143652	0.854628	NC	-0.913815	0.0570838	NC	1.07137	0.0246963	UP	BTBD2_HUMAN	BTB/POZ domain-containing protein 2
cluster_contig15354	0.623209	0.22201	NC	1.44145	0.00727514	UP	-0.798655	0.229913	NC	MAOX_ANAPL	NADP-dependent malic enzyme
cluster_contig15358	2.67108	1.64e-05	UP	0.512912	0.365828	NC	2.16893	0.00254073	NC	LBX1_XENTR	Transcription factor LBX1
cluster_contig15364	-1.63885	0.000117517	DOWN	-1.00653	0.0277275	DOWN	-0.627162	0.191028	NC	CUA3A_TENMO	Larval cuticle protein A3A
cluster_contig15365	-0.371777	0.601283	NC	-1.1323	0.036129	DOWN	0.767158	0.165315	NC	PPBT_CHICK	Alkaline phosphatase, tissue-nonspecific isozyme
cluster_contig1537	-1.6558	0.000655459	DOWN	-1.68278	0.000720126	DOWN	0.0405596	0.984119	NC	CCR7_MOUSE	C-C chemokine receptor type 7
cluster_contig15382	-1.6572	0.000137368	DOWN	0.491053	0.333154	NC	-2.13501	5.88e-07	DOWN	TRAIP_MOUSE	E3 ubiquitin-protein ligase TRAIP
cluster_contig15383	-1.66715	8.56e-05	DOWN	0.209488	0.751544	NC	-1.8617	1.28e-05	DOWN	CAH3_HUMAN	Carbonic anhydrase 3
cluster_contig15384	2.06179	2.22e-06	UP	0.0830771	0.897965	NC	1.98076	6.36e-06	UP	T185B_BOVIN	Transmembrane protein 185B
cluster_contig15385	1.40453	0.00531381	UP	0.0670454	0.950079	NC	1.34916	0.00988358	UP	SV2C_RAT	Synaptic vesicle glycoprotein 2C
cluster_contig1539	-1.2404	0.00926889	DOWN	-0.235397	0.788447	NC	-0.999222	0.0375103	NC
cluster_contig15393	-0.204576	0.736163	NC	5.48611	5.57e-20	UP	-5.67572	3.3e-21	DOWN	XP_015111075.1	PREDICTED: keratin-associated protein 19-2-like [Diachasma alloeum]
cluster_contig15395	0	1	NC	-1.61486	0.00252732	DOWN	1.65002	0.00214604	UP	THA2_ARATH	Probable low-specificity L-threonine aldolase 2
cluster_contig15398	-7.93931	8.49e-14	NC	-9.96753	3.66e-27	DOWN	2.03471	7.97e-06	NC	ABCF3_HUMAN	ATP-binding cassette sub-family F member 3
cluster_contig1546	-0.830115	0.165127	NC	-1.33132	0.013577	DOWN	0.51075	0.384777	NC	TRET1_CULQU	Facilitated trehalose transporter Tret1 {ECO:0000250|UniProtKB:Q7PIR5}
cluster_contig1547	-8.93938	2.88e-20	DOWN	-7.86088	5.92e-13	DOWN	-1.07806	0.0363522	DOWN	CTR1_SOLIN	Chymotrypsin-1
cluster_contig1553	-0.377636	0.481604	NC	-1.63162	0.000170506	NC	1.2622	0.00410591	UP	B3G2P_DROME	Galactosylgalactosylxylosylprotein 3-beta-glucuronosyltransferase P
cluster_contig15538	-1.95005	1.21e-05	DOWN	-1.52614	0.000975323	DOWN	-0.412766	0.459064	NC	PKN_DROME	Serine/threonine-protein kinase N
cluster_contig1555	-0.960339	0.0393303	NC	-1.90953	1.16e-05	DOWN	0.963408	0.0364034	NC	ARG28_HUMAN	Rho guanine nucleotide exchange factor 28
cluster_contig1558	-1.22918	0.0345655	DOWN	-2.35342	2.44e-06	DOWN	1.14037	0.0203887	UP
cluster_contig1563	-10.2137	9.48e-30	DOWN	0	1	NC	-6.72561	2.35e-24	NC	PCID2_HUMAN	PCI domain-containing protein 2
cluster_contig1566	-2.0891	9.83e-07	DOWN	-1.58121	0.000318133	DOWN	-0.48985	0.332308	NC	V111_FOWPN	Probable serine/threonine-protein kinase FPV111
cluster_contig1568	-2.33949	2.15e-07	DOWN	-1.41003	0.00327719	DOWN	-0.91384	0.0655746	NC	DIA1_XENTR	Deleted in autism protein 1 homolog
cluster_contig1569	1.30591	0.00573104	UP	-0.155428	0.850971	NC	1.47828	0.00168106	UP	MYO9B_HUMAN	Unconventional myosin-IXb
cluster_contig15705	0.180632	0.759382	NC	-0.812058	0.0852573	NC	1.0037	0.0256595	UP	RDH12_BOVIN	Retinol dehydrogenase 12
cluster_contig15708	-0.987424	0.0393532	NC	-1.3012	0.00547183	DOWN	0.330142	0.553291	NC	ZCH18_MOUSE	Zinc finger CCCH domain-containing protein 18
cluster_contig15709	-1.46671	0.0151906	DOWN	-1.95422	0.000602627	DOWN	0.491249	0.467859	NC	FCSD2_HUMAN	FCH and double SH3 domains protein 2
cluster_contig15719	-1.09323	0.0190491	DOWN	-0.484633	0.427648	NC	-0.60311	0.211496	NC	GATA4_XENLA	Transcription factor GATA-4
cluster_contig1579	-2.02115	3.32e-06	DOWN	0.217471	0.820818	NC	-2.22722	9.51e-07	DOWN	PNBA_BACSU	Para-nitrobenzyl esterase
cluster_contig1580	0.994257	0.075779	NC	-2.71608	9.6e-10	DOWN	3.7268	3.72e-15	NC	PRP6_RAT	Pre-mRNA-processing factor 6
cluster_contig1582	9.71945	4.75e-26	UP	-1.53964	0.000546646	DOWN	11.1666	6.19e-37	UP	AF10_MOUSE	Protein AF-10
cluster_contig15823	0.439361	0.387852	NC	-0.620227	0.211697	NC	1.06888	0.0162335	UP	GRM1B_HUMAN	GRAM domain-containing protein 1B
cluster_contig1588	-0.841086	0.103182	NC	-1.19297	0.0158963	DOWN	0.361255	0.553757	NC
cluster_contig1589	-7.94258	8.49e-14	DOWN	0	1	NC	-7.83863	4.07e-13	DOWN	MPIP_DROME	M-phase inducer phosphatase
cluster_contig159	-1.35969	0.00185825	DOWN	-0.936512	0.0469983	NC	-0.414507	0.42786	NC	GPCP1_RAT	Glycerophosphocholine phosphodiesterase GPCPD1
cluster_contig1598	3.84875	4.47e-18	NC	1.06062	0.0191647	UP	2.80851	9e-11	NC	TRET1_CULQU	Facilitated trehalose transporter Tret1 {ECO:0000250|UniProtKB:Q7PIR5}
cluster_contig16036	-1.23361	0.0045844	DOWN	-0.817973	0.0837324	NC	-0.406035	0.434683	NC	OGT1_MOUSE	UDP-N-acetylglucosamine--peptide N-acetylglucosaminyltransferase 110 kDa subunit
cluster_contig16037	0.73921	0.111733	NC	1.52477	0.000418454	UP	-0.773863	0.098157	NC	KC1A_XENLA	Casein kinase I isoform alpha
cluster_contig16039	-0.824352	0.0816663	NC	1.05605	0.0380083	UP	-1.87323	4.65e-05	NC	SR140_PONAB	U2 snRNP-associated SURP motif-containing protein
cluster_contig16040	0.13469	0.884531	NC	-2.13208	5.63e-06	NC	2.27529	1.53e-06	UP	FXL20_HUMAN	F-box/LRR-repeat protein 20
cluster_contig1605	-1.62038	0.00315947	DOWN	0	1	NC	-1.28099	0.0142816	DOWN
cluster_contig16185	-1.32456	0.0031235	DOWN	0.136837	0.875052	NC	-1.45351	0.00140587	DOWN	DIHR_ACHDO	Diuretic hormone receptor
cluster_contig1625	-0.143309	0.87119	NC	7.55941	1.68e-11	UP	-7.58452	1.13e-11	DOWN	Y1760_DROME	Probable G-protein coupled receptor CG31760
cluster_contig16266	-1.32661	0.00410082	DOWN	-1.35357	0.00409291	DOWN	0.0385703	0.963436	NC	RUND1_MOUSE	RUN domain-containing protein 1
cluster_contig1627	2.32931	9.35e-07	UP	1.7893	6.52e-05	UP	0.547287	0.510765	NC	ANKF1_HUMAN	Ankyrin repeat and fibronectin type-III domain-containing protein 1
cluster_contig1629	-4.10533	2.98e-18	DOWN	-4.02907	1.85e-17	DOWN	-0.0654425	0.915876	NC	SYMC_XENLA	Methionine--tRNA ligase, cytoplasmic
cluster_contig1632	-0.898907	0.0751387	NC	-1.5394	0.00133827	DOWN	0.648623	0.232814	NC
cluster_contig1638	0.801162	0.0882069	NC	-1.01862	0.0264617	DOWN	1.8314	2.03e-05	NC	DDX17_DROME	ATP-dependent RNA helicase p62
cluster_contig164	-1.13833	0.0129032	DOWN	-1.10683	0.0204356	DOWN	-0.0239176	0.958221	NC	ODC_BOVIN	Mitochondrial 2-oxodicarboxylate carrier
cluster_contig16413	0	1	NC	-1.22863	0.0880175	NC	1.80335	0.00731786	UP	M4K3_HUMAN	Mitogen-activated protein kinase kinase kinase kinase 3
cluster_contig16415	-1.19151	0.0130663	DOWN	-0.594841	0.296787	NC	-0.584311	0.295064	NC	AKA10_MOUSE	A-kinase anchor protein 10, mitochondrial
cluster_contig16417	-1.57229	0.000525372	DOWN	-0.820318	0.117677	NC	-0.743011	0.123165	NC	MGT4B_DANRE	Alpha-1,3-mannosyl-glycoprotein 4-beta-N-acetylglucosaminyltransferase B
cluster_contig1642	-1.2499	0.0141049	DOWN	-0.807373	0.188217	NC	-0.435258	0.44441	NC	BRN_DROME	Beta-1,3-galactosyltransferase brn
cluster_contig1648	7.14891	8.49e-10	UP	-0.958967	0.0782997	NC	8.02103	4.7e-14	UP	ODO1_MACFA	2-oxoglutarate dehydrogenase, mitochondrial
cluster_contig1649	-0.720792	0.127304	NC	1.06079	0.0208174	UP	-1.7657	4.11e-05	DOWN	ODO1_MACFA	2-oxoglutarate dehydrogenase, mitochondrial
cluster_contig1651	1.10759	0.0147461	NC	1.20886	0.0099882	UP	-0.0936825	0.916469	NC	NR2C2_MOUSE	Nuclear receptor subfamily 2 group C member 2
cluster_contig1653	-1.19552	0.0155326	NC	-2.43769	8.85e-08	NC	1.25371	0.00693543	UP	RN19A_HUMAN	E3 ubiquitin-protein ligase RNF19A
cluster_contig1657	0.185831	0.777125	NC	4.04341	5.6e-12	UP	-3.83864	8.6e-11	DOWN	U430_DROME	UPF0430 protein CG31712
cluster_contig1670	2.29306	1.76e-07	UP	0.381331	0.52121	NC	1.92769	1.36e-05	UP	CL190_DROME	Restin homolog
cluster_contig1674	1.88423	0.0006857	UP	0.956496	0.109741	NC	0	1	NC	APOD_HUMAN	Apolipoprotein D
cluster_contig16743	0.157884	0.813558	NC	-0.83354	0.0927601	NC	1.00144	0.0367321	UP	MFSD6_HUMAN	Major facilitator superfamily domain-containing protein 6
cluster_contig16779	3.54734	7.61e-11	UP	0.905228	0.0756294	NC	2.65411	5.49e-06	UP	ERCC6_HUMAN	DNA excision repair protein ERCC-6
cluster_contig16781	-1.02679	0.0284601	DOWN	-0.780253	0.124988	NC	-0.246354	0.681631	NC	LOC107043586	Odorant receptor
cluster_contig1681	-0.0295757	0.970388	NC	1.62292	0.000689941	UP	-1.63562	0.000568746	DOWN	DHX16_HUMAN	Putative pre-mRNA-splicing factor ATP-dependent RNA helicase DHX16
cluster_contig1683	-1.00797	0.0242427	DOWN	-0.446309	0.40748	NC	-0.551446	0.268053	NC	APC4_HUMAN	Anaphase-promoting complex subunit 4
cluster_contig1686	-1.16037	0.0340789	NC	-2.43952	5.79e-07	DOWN	1.29179	0.00924398	NC	ELVL1_AEDAE	Elongation of very long chain fatty acids protein AAEL008004
cluster_contig169	-0.247891	0.657824	NC	0.768321	0.102312	NC	-1.00834	0.0232547	DOWN	STK10_MOUSE	Serine/threonine-protein kinase 10
cluster_contig1691	-1.59596	0.00499279	DOWN	-1.09623	0.108002	NC	-0.49243	0.406812	NC	SDCG8_MOUSE	Serologically defined colon cancer antigen 8 homolog
cluster_contig1693	6.70297	2.6e-33	NC	-1.61693	0.000158184	NC	8.32631	2.05e-46	UP	FOXO_DROWI	Forkhead box protein O {ECO:0000250|UniProtKB:Q95V55}
cluster_contig16933	-2.22288	2.63e-06	DOWN	0	1	NC	-2.12162	7.77e-06	DOWN
cluster_contig16935	1.8593	6.95e-05	UP	1.28945	0.00790344	UP	0.576241	0.31885	NC	ADCY2_DROME	Adenylate cyclase type 2
cluster_contig1699	-1.3934	0.00265674	DOWN	-0.56538	0.370981	NC	-0.817497	0.0800186	NC	PABP2_DROME	Polyadenylate-binding protein 2
cluster_contig17	-0.857384	0.0776251	NC	-1.08354	0.0228722	DOWN	0.235095	0.695655	NC
cluster_contig1701	-1.032	0.0229421	DOWN	0.541907	0.290643	NC	-1.56913	0.000286584	DOWN	C3G_DROME	Guanine nucleotide-releasing factor 2
cluster_contig1702	1.45464	0.000946904	UP	0.828494	0.0748061	NC	0.637011	0.22155	NC	BRN_DROME	Beta-1,3-galactosyltransferase brn
cluster_contig17064	-1.99482	3.11e-06	DOWN	-0.509513	0.349278	NC	-1.47354	0.000663976	DOWN	ECHD3_RAT	Enoyl-CoA hydratase domain-containing protein 3, mitochondrial
cluster_contig17073	-0.773781	0.119	NC	0.2835	0.590233	NC	-1.05322	0.0197993	DOWN	DHGL_DROME	Glucose dehydrogenase [FAD, quinone]
cluster_contig1711	0	1	NC	-1.98299	0.00055206	DOWN	2.13588	0.000280528	NC
cluster_contig1715	-1.3905	0.0104189	DOWN	0	1	NC	-1.36386	0.0158163	NC
cluster_contig1720	1.86881	7.65e-05	UP	-0.177037	0.778744	NC	2.05834	1.3e-05	UP	RHDF1_DROME	Inactive rhomboid protein 1
cluster_contig1722	-1.29775	0.00315549	DOWN	-3.06868	1.33e-12	DOWN	1.78659	2.56e-05	UP	CPLX_DROME	Complexin
cluster_contig1723	-0.170168	0.808474	NC	-1.02452	0.0316463	DOWN	0.873844	0.0632663	NC	ADCY9_CHICK	Adenylate cyclase type 9
cluster_contig1726	-0.204999	0.741923	NC	-1.03783	0.0266479	DOWN	0.845226	0.0742133	NC	GLPK5_DANRE	Putative glycerol kinase 5
cluster_contig1728	-0.233166	0.684769	NC	1.25503	0.00573322	UP	-1.47524	0.000830641	DOWN	SPRTN_HUMAN	SprT-like domain-containing protein Spartan
cluster_contig1729	1.24906	0.0056438	UP	1.21108	0.00919168	UP	0.0436961	0.950927	NC	POL4_DROME	Retrovirus-related Pol polyprotein from transposon 412
cluster_contig1731	-2.97396	7.68e-12	NC	-1.19773	0.00916696	NC	-1.76777	4.42e-05	DOWN	ARMC7_MOUSE	Armadillo repeat-containing protein 7
cluster_contig1733	0.94068	0.0427032	NC	-0.939198	0.0428959	NC	1.89316	1.23e-05	UP	XP_015110860.1	PREDICTED: uncharacterized protein LOC107037053 [Diachasma alloeum]
cluster_contig1735	-10.0371	2.11e-28	DOWN	-8.35503	9.37e-16	DOWN	-1.69037	0.000112923	DOWN	ALG14_MOUSE	UDP-N-acetylglucosamine transferase subunit ALG14 homolog
cluster_contig1737	-3.97458	3.92e-14	DOWN	0	1	NC	-2.72882	3.2e-09	DOWN	Y1505_DROME	La-related protein CG11505
cluster_contig1738	2.12422	9.59e-07	UP	0.949016	0.0441689	NC	1.18652	0.00987691	UP	CLAP1_XENTR	CLIP-associating protein 1 {ECO:0000250|UniProtKB:Q7Z460}
cluster_contig1740	-2.22479	5.83e-06	DOWN	-0.756048	0.208372	NC	-1.45262	0.0069555	DOWN
cluster_contig1745	-1.34888	0.00180496	DOWN	0.651595	0.188088	NC	-1.99713	2.45e-06	DOWN	ABHD2_DROME	Abhydrolase domain-containing protein 2
cluster_contig1748	-2.04729	1.62e-05	NC	-0.0834949	0.968788	NC	-1.95613	9.71e-06	DOWN	OSP_DROME	Protein outspread
cluster_contig1752	-1.67362	0.000792456	DOWN	-1.75262	0.0003868	DOWN	0.0957429	0.831033	NC	HEXC_BOMMO	Chitooligosaccharidolytic beta-N-acetylglucosaminidase
cluster_contig1753	0.9329	0.0841669	NC	-1.3074	0.00496271	DOWN	2.24984	1.53e-06	UP	TBC16_HUMAN	TBC1 domain family member 16
cluster_contig1756	-1.01069	0.039575	DOWN	-0.809494	0.128256	NC	-0.192023	0.758545	NC	ADAL_HUMAN	Adenosine deaminase-like protein
cluster_contig176	-1.00035	0.0236902	DOWN	0.197137	0.753519	NC	-1.18754	0.00645556	DOWN	AMPN_FELCA	Aminopeptidase N
cluster_contig1760	-0.0262106	0.970611	NC	1.30443	0.003025	UP	-1.32005	0.00239663	DOWN	EXOSX_HUMAN	Exosome component 10
cluster_contig1761	-1.14745	0.00863428	DOWN	-0.836187	0.0735874	NC	-0.296009	0.595197	NC	ART2_YEAST	Putative uncharacterized protein ART2
cluster_contig1762	-1.2027	0.00592905	DOWN	0.748418	0.112453	NC	-1.94688	3.8e-06	DOWN	LRC15_HUMAN	Leucine-rich repeat-containing protein 15
cluster_contig1770	-1.38843	0.00116128	DOWN	-0.750129	0.113921	NC	-0.623214	0.194408	NC	MYRO1_BREBR	Myrosinase 1 {ECO:0000303|PubMed:11804799}
cluster_contig1773	-0.282181	0.725467	NC	-1.24655	0.0201766	DOWN	0.978096	0.0817496	NC
cluster_contig1778	-0.0415833	0.966681	NC	-2.32518	1.41e-07	DOWN	2.2912	1.76e-07	NC	DLL_DROME	Homeotic protein distal-less
cluster_contig178	-7.51489	1.87e-11	DOWN	0	1	NC	-2.30324	0.000134949	NC	LRIT3_HUMAN	Leucine-rich repeat, immunoglobulin-like domain and transmembrane domain-containing protein 3
cluster_contig1783	1.33249	0.00824917	UP	-0.225895	0.74865	NC	1.56786	0.00155152	UP	CRN_DROME	Protein crooked neck
cluster_contig1784	-8.46365	4.63e-17	DOWN	0	1	NC	-2.87443	1.35e-05	NC	P3_HUMAN	P3 protein
cluster_contig1787	1.11332	0.0421522	UP	1.8386	0.000467337	NC	0	1	NC	IHOG_DROVI	Interference hedgehog {ECO:0000250|UniProtKB:Q9VM64}
cluster_contig1788	1.0695	0.0314864	UP	0.616259	0.280889	NC	0.463937	0.456823	NC	IHOG_DROVI	Interference hedgehog {ECO:0000250|UniProtKB:Q9VM64}
cluster_contig1790	-2.50034	1.63e-08	NC	8.92147	1.65e-18	NC	-11.3024	1.11e-36	DOWN	MTF2_PONAB	Metal-response element-binding transcription factor 2
cluster_contig1794	-0.925344	0.0543379	NC	-1.16555	0.0138396	DOWN	0.253214	0.662893	NC	CBPB_ASTAS	Carboxypeptidase B
cluster_contig1796	-0.153332	0.798009	NC	1.34835	0.00188028	UP	-1.49188	0.000463316	DOWN	TS101_HUMAN	Tumor susceptibility gene 101 protein
cluster_contig1798	0	1	NC	-0.897808	0.134162	NC	1.29551	0.0294848	UP	THK33220.1	chemosensory protein 3
cluster_contig1817	0.850662	0.0641288	NC	-0.143049	0.834733	NC	1.00827	0.0258827	UP	CLCN7_HUMAN	H(+)/Cl(-) exchange transporter 7
cluster_contig1819	0.627577	0.202712	NC	-1.99646	2.75e-06	DOWN	2.63949	7.18e-10	UP	TITIN_DROME	Titin
cluster_contig1820	0.517945	0.314306	NC	-0.781759	0.111568	NC	1.30246	0.00368947	UP	THIM_HUMAN	3-ketoacyl-CoA thiolase, mitochondrial
cluster_contig1823	0.122818	0.841573	NC	-0.952567	0.0387914	NC	1.09287	0.0142904	UP	INE_DROME	Sodium- and chloride-dependent GABA transporter ine
cluster_contig1824	-0.00244852	1	NC	1.43104	0.00277626	NC	-1.4213	0.0027932	DOWN	FHL2_BOVIN	Four and a half LIM domains protein 2
cluster_contig1828	-1.19596	0.00841344	DOWN	-0.364142	0.525055	NC	-0.815815	0.102914	NC
cluster_contig1831	-1.77787	0.00450894	DOWN	-1.4811	0.0413862	NC	-0.283076	0.621114	NC	RP147_FOWPN	DNA-directed RNA polymerase 147 kDa polypeptide
cluster_contig1837	-1.25713	0.00364217	DOWN	-0.494362	0.342111	NC	-0.755044	0.105489	NC	CTR2_VESOR	Chymotrypsin-2
cluster_contig1843	-1.82674	0.000177118	DOWN	-1.47444	0.0047477	DOWN	-0.350082	0.530715	NC	MTFP1_HUMAN	Mitochondrial fission process protein 1
cluster_contig1845	-1.12026	0.0104334	DOWN	-0.0815832	0.911827	NC	-1.03231	0.0200915	DOWN	S2611_HUMAN	Sodium-independent sulfate anion transporter
cluster_contig1847	-0.0889606	0.957471	NC	7.45346	4.73e-11	UP	-7.42228	7.01e-11	NC	XP_015113256.1	PREDICTED: uncharacterized protein LOC107038587 isoform X1 [Diachasma alloeum]
cluster_contig1848	-0.934711	0.0524672	NC	0.311294	0.683356	NC	-1.23243	0.0126833	DOWN	DCAL1_DRONO	Dromaiocalcin-1
cluster_contig1849	-1.14015	0.00949935	DOWN	-1.25457	0.00453542	DOWN	0.121667	0.847673	NC	NCKX5_MOUSE	Sodium/potassium/calcium exchanger 5
cluster_contig1850	-0.0981491	0.875048	NC	1.66445	9.51e-05	UP	-1.7568	3.17e-05	DOWN	FOXN3_MOUSE	Forkhead box protein N3
cluster_contig1854	10.6617	5.88e-32	UP	-0.057997	0.917997	NC	10.6341	1.46e-32	NC
cluster_contig1860	1.03127	0.0298648	UP	1.52361	0.000603213	UP	-0.486989	0.334409	NC	AF10_MOUSE	Protein AF-10
cluster_contig1861	1.01234	0.0228516	UP	0.80809	0.0852305	NC	0.21659	0.714803	NC	AF10_MOUSE	Protein AF-10
cluster_contig1866	3.14276	4.65e-10	UP	6.08032	1.32e-17	UP	0	1	NC	RL1B_YEAST	60S ribosomal protein L1-B
cluster_contig1868	0.540039	0.287274	NC	-0.687312	0.165569	NC	1.24376	0.00575196	UP	EGFR_APIME	Epidermal growth factor receptor
cluster_contig1872	1.31999	0.0119723	UP	0.49864	0.45187	NC	0.831621	0.152507	NC	LYST_BOVIN	Lysosomal-trafficking regulator
cluster_contig1877	-1.0526	0.0175665	DOWN	-1.11484	0.0129399	DOWN	0.0656713	0.924513	NC	EP15R_HUMAN	Epidermal growth factor receptor substrate 15-like 1
cluster_contig1890	-1.46776	0.00392088	DOWN	-0.172226	0.86009	NC	-1.28286	0.0184169	DOWN
cluster_contig1893	-2.38323	2.69e-06	NC	0	1	NC	-2.18498	1.13e-05	DOWN	TOLL_DROME	Protein toll
cluster_contig1894	-0.00788219	1	NC	10.8848	3.59e-33	UP	-10.7697	2.23e-32	NC	MVL_DROME	Protein Malvolio
cluster_contig1896	-1.18653	0.0206682	DOWN	-0.707432	0.272251	NC	-0.471373	0.384857	NC
cluster_contig19	9.28771	7.46e-23	UP	0.0233504	0.970306	NC	9.17782	1.31e-21	NC	SAP47_DROME	Synapse-associated protein of 47 kDa
cluster_contig1902	-1.10777	0.0113067	DOWN	-0.738175	0.121401	NC	-0.360513	0.497121	NC	HIBCH_DANRE	3-hydroxyisobutyryl-CoA hydrolase, mitochondrial
cluster_contig1910	-0.509096	0.302773	NC	0.618258	0.211461	NC	-1.12516	0.0105691	DOWN	UBA1_RABIT	Ubiquitin-like modifier-activating enzyme 1
cluster_contig1911	1.84721	1.56e-05	UP	1.17747	0.0087472	UP	0.676399	0.168307	NC	M3K10_XENLA	Mitogen-activated protein kinase kinase kinase 10
cluster_contig1912	-1.10742	0.0289247	DOWN	2.01477	0.0005001	NC	-3.10612	9.05e-09	NC	PELET_DROME	Transposable element P transposase
cluster_contig1916	1.24562	0.0170289	UP	0.657003	0.185582	NC	0.602767	0.412236	NC	TRAP1_MOUSE	Heat shock protein 75 kDa, mitochondrial
cluster_contig1924	1.53369	0.000473348	UP	3.85509	1.31e-16	UP	-2.30618	6.53e-07	DOWN	PTP10_DROME	Tyrosine-protein phosphatase 10D
cluster_contig1939	-1.39262	0.00120032	DOWN	-0.4479	0.399442	NC	-0.934795	0.0403118	NC	XP_015126510.1	PREDICTED: uncharacterized protein LOC107048065 [Diachasma alloeum]
cluster_contig1949	-9.0677	1.1e-21	NC	0	1	NC	-9.03142	1.18e-20	DOWN	FNBP4_MOUSE	Formin-binding protein 4
cluster_contig1953	-8.51087	2.4e-17	DOWN	-8.14699	1.97e-14	NC	-0.37444	0.442438	NC	DOCK1_HUMAN	Dedicator of cytokinesis protein 1
cluster_contig1954	-0.239226	0.829621	NC	-1.74162	0.00065092	DOWN	1.51444	0.00278008	UP	YCX91_PHAAO	Uncharacterized protein ORF91
cluster_contig1962	1.16254	0.0193851	UP	0.590495	0.293361	NC	0.582828	0.316898	NC	OXSR1_PIG	Serine/threonine-protein kinase OSR1
cluster_contig1964	-1.12437	0.0122902	DOWN	0.0200927	0.996595	NC	-1.12696	0.0141545	DOWN	LOZEN_DROME	Protein lozenge
cluster_contig1966	1.95759	3.93e-06	UP	0.171062	0.792446	NC	1.78752	2.85e-05	NC	HCN4_HUMAN	Potassium/sodium hyperpolarization-activated cyclic nucleotide-gated channel 4
cluster_contig1971	-0.34996	0.521104	NC	0.963066	0.0416579	NC	-1.30014	0.00374423	DOWN	ZN236_HUMAN	Zinc finger protein 236
cluster_contig1972	-2.1742	0.000195605	DOWN	0	1	NC	-2.9132	1.76e-06	DOWN	KCNK9_XENLA	Potassium channel subfamily K member 9
cluster_contig1973	0.948013	0.0439472	NC	-0.358435	0.542704	NC	1.31406	0.00380894	UP	OGA_MOUSE	Protein O-GlcNAcase {ECO:0000303|PubMed:16517082}
cluster_contig1980	-2.61957	8.65e-10	DOWN	-0.509207	0.337043	NC	-2.08821	9.96e-07	DOWN	K0930_XENLA	Uncharacterized protein KIAA0930 homolog
cluster_contig1983	0.176618	0.793884	NC	1.31409	0.00907618	UP	-1.12308	0.0358959	DOWN	SOX21_XENLA	Transcription factor Sox-21 {ECO:0000303|PubMed:18956331}
cluster_contig1985	-2.06158	8.82e-07	DOWN	-0.965173	0.0339493	NC	-1.08739	0.0138	DOWN	PNPH_BOVIN	Purine nucleoside phosphorylase
cluster_contig1994	-0.679465	0.149937	NC	0.630714	0.216133	NC	-1.29896	0.00330134	DOWN	KRH1_DROME	Krueppel homolog 1
cluster_contig1997	-1.57632	0.000923195	DOWN	-0.367676	0.666064	NC	-1.20807	0.00866291	NC	XP_015120265.1	PREDICTED: general transcriptional corepressor CYC8-like [Diachasma alloeum]
cluster_contig2007	-0.875692	0.159713	NC	0.452997	0.464919	NC	-1.3204	0.0161374	DOWN
cluster_contig2012	0.526961	0.285717	NC	1.27184	0.00400542	UP	-0.735175	0.119096	NC	TMM47_DANRE	Transmembrane protein 47
cluster_contig2017	-1.4121	0.00443529	DOWN	0	1	NC	-1.67934	0.00106174	DOWN	STUB_DROME	Serine proteinase stubble
cluster_contig2018	-1.37593	0.00148333	DOWN	-0.00779019	0.985936	NC	-1.3544	0.00222278	DOWN	NOL11_HUMAN	Nucleolar protein 11
cluster_contig2019	-1.21462	0.00612519	DOWN	-0.982969	0.0352872	NC	-0.222257	0.704304	NC	UBE3B_MOUSE	Ubiquitin-protein ligase E3B
cluster_contig202	-1.49177	0.00112831	DOWN	-1.95389	1.34e-05	DOWN	0.476846	0.36096	NC	PPT1_MACFA	Palmitoyl-protein thioesterase 1
cluster_contig2029	-1.99763	0.000413159	DOWN	0	1	NC	-2.35917	0.000202932	DOWN
cluster_contig203	-1.18758	0.00653498	DOWN	-1.43226	0.000980075	DOWN	0.255378	0.655955	NC	RN167_MOUSE	E3 ubiquitin-protein ligase RNF167
cluster_contig2030	-1.30037	0.00327317	NC	9.95505	5.75e-26	NC	-11.134	2.67e-35	DOWN	ACADM_DROME	Probable medium-chain specific acyl-CoA dehydrogenase, mitochondrial
cluster_contig2043	0.418802	0.416331	NC	1.43777	0.000981154	UP	-1.00378	0.0258165	NC	IF4G3_HUMAN	Eukaryotic translation initiation factor 4 gamma 3
cluster_contig2052	0	1	NC	-8.46612	1.15e-16	DOWN	8.3676	3.21e-16	UP	DNS2B_HUMAN	Deoxyribonuclease-2-beta
cluster_contig2055	0	1	NC	-1.367	0.0116761	DOWN	8.14469	9.14e-15	UP	SRYA_DROPS	Serendipity locus protein alpha
cluster_contig2057	1.41733	0.00119546	NC	1.39332	0.0026884	UP	0.0377194	0.926204	NC	SOCS5_MOUSE	Suppressor of cytokine signaling 5
cluster_contig2063	-9.07105	3.57e-21	DOWN	-7.4416	1.38e-10	NC	-1.62789	0.000459605	NC	S2538_XENTR	Solute carrier family 25 member 38 {ECO:0000255|HAMAP-Rule:MF_03064}
cluster_contig2064	7.16277	8.49e-10	UP	-1.85602	0.000122282	DOWN	8.93029	6.76e-20	UP	DEPD5_HUMAN	DEP domain-containing protein 5
cluster_contig2069	-1.1445	0.0129357	DOWN	-0.597884	0.292505	NC	-0.542416	0.260208	NC	RSPRY_HUMAN	RING finger and SPRY domain-containing protein 1
cluster_contig2076	-1.14804	0.01562	DOWN	2.26046	2.58e-05	NC	-3.39085	2.73e-11	NC	DTWD2_HUMAN	DTW domain-containing protein 2
cluster_contig2079	0.608112	0.380726	NC	-1.31025	0.0129418	DOWN	1.92666	0.000316288	NC
cluster_contig2082	1.07681	0.0146226	UP	0.852465	0.0697733	NC	0.238774	0.67516	NC	UN13A_RAT	Protein unc-13 homolog A
cluster_contig2083	-3.00714	6.21e-06	NC	0	1	NC	-7.05082	3.95e-09	DOWN
cluster_contig2091	0.822552	0.137903	NC	-0.897216	0.0861128	NC	1.73403	0.000437931	UP	ICK_MOUSE	Serine/threonine-protein kinase ICK
cluster_contig2104	-9.41886	1.01e-23	DOWN	-9.6028	1.83e-24	DOWN	0.190619	0.740928	NC	SRC42_DROME	Tyrosine-protein kinase Src42A
cluster_contig2106	1.42207	0.0010397	UP	0.0595135	0.935756	NC	1.3746	0.00169099	UP	ACVR1_HUMAN	Activin receptor type-1
cluster_contig2107	-1.10542	0.0148724	DOWN	0.189618	0.728704	NC	-1.28678	0.00312821	DOWN
cluster_contig2108	-2.18745	4.15e-07	NC	0.113738	0.828497	NC	-2.2916	7.26e-08	DOWN	XP_015113759.1	PREDICTED: uncharacterized protein LOC107038919 [Diachasma alloeum]
cluster_contig2114	-3.10432	2.72e-12	DOWN	-2.06369	4.35e-06	NC	-1.03713	0.0209092	NC	RGPS2_MACFA	Ras-specific guanine nucleotide-releasing factor RalGPS2
cluster_contig2118	-7.77475	7.86e-13	DOWN	0	1	NC	-1.14537	0.0810192	NC	DYH3_MOUSE	Dynein heavy chain 3, axonemal
cluster_contig2119	2.01671	4.15e-06	UP	0.682855	0.174342	NC	1.34141	0.00339053	UP	PANG1_DROME	Protein pangolin, isoforms A/H/I/S
cluster_contig2127	0	1	NC	-9.90446	1.09e-26	DOWN	9.80347	3.96e-26	UP	FLOT2_DROME	Flotillin-2
cluster_contig2130	-0.843422	0.161716	NC	-1.27056	0.024789	DOWN	0.43365	0.529932	NC
cluster_contig2132	-0.929888	0.0493516	NC	1.25314	0.00884041	UP	-2.17345	1.02e-06	DOWN	COX16_PONAB	Cytochrome c oxidase assembly protein COX16 homolog, mitochondrial
cluster_contig2137	0	1	NC	-1.23777	0.0226629	DOWN	0.916113	0.116762	NC
cluster_contig2138	-0.551962	0.326157	NC	1.38846	0.00522065	UP	-1.93065	5.31e-05	DOWN
cluster_contig2141	7.50341	1.44e-11	UP	1.06586	0.111607	NC	0	1	NC	STAC2_MOUSE	SH3 and cysteine-rich domain-containing protein 2
cluster_contig2144	1.24135	0.00575633	UP	2.12816	7.86e-07	UP	-0.872296	0.0601697	NC	ASP_DROME	Protein abnormal spindle
cluster_contig2149	-0.501086	0.331346	NC	0.631032	0.210917	NC	-1.12496	0.0123007	DOWN	LIPP_RABIT	Pancreatic triacylglycerol lipase
cluster_contig215	0.00510414	0.987199	NC	-1.0081	0.0534304	NC	1.02478	0.0412832	UP	CGT_MOUSE	2-hydroxyacylsphingosine 1-beta-galactosyltransferase
cluster_contig2152	0	1	NC	-0.758977	0.292588	NC	7.08993	5.4e-09	UP	CE164_MOUSE	Centrosomal protein of 164 kDa {ECO:0000250|UniProtKB:Q9UPV0}
cluster_contig2154	-1.45886	0.00185793	DOWN	-1.9505	1.83e-05	DOWN	0.504853	0.319435	NC	AT8A1_MOUSE	Phospholipid-transporting ATPase IA
cluster_contig2155	0.455577	0.398941	NC	-0.869273	0.0747425	NC	1.34096	0.00314372	UP	DEN1A_XENLA	DENN domain-containing protein 1A
cluster_contig2159	0.571598	0.247331	NC	1.35617	0.00273338	UP	-0.771807	0.115288	NC	S27A4_MOUSE	Long-chain fatty acid transport protein 4
cluster_contig216	-1.07037	0.0495075	DOWN	1.2028	0.0485947	NC	-2.25929	3.43e-05	NC
cluster_contig2161	0.776917	0.100791	NC	1.32757	0.00480597	UP	-0.534495	0.342922	NC	NU107_MOUSE	Nuclear pore complex protein Nup107
cluster_contig2162	-1.17799	0.00773203	DOWN	0.413216	0.4294	NC	-1.58185	0.000209748	DOWN	RUSD2_MOUSE	RNA pseudouridylate synthase domain-containing protein 2
cluster_contig2163	1.30152	0.0118194	UP	-0.115874	0.89038	NC	1.42734	0.00570788	UP	CTNA_DROME	Catenin alpha
cluster_contig2169	1.8658	0.000242646	NC	-0.550402	0.323202	NC	2.42922	7.82e-07	UP	GNAS_ANOGA	Guanine nucleotide-binding protein G(s) subunit alpha
cluster_contig217	0.10225	0.87295	NC	-1.12181	0.0126156	DOWN	1.23596	0.00494605	UP	FA46C_HUMAN	Protein FAM46C
cluster_contig218	2.26063	2.51e-07	UP	-0.661779	0.193213	NC	2.92621	3.64e-11	UP	ECHD3_RAT	Enoyl-CoA hydratase domain-containing protein 3, mitochondrial
cluster_contig2191	-1.21358	0.00556091	DOWN	-0.567617	0.266073	NC	-0.633542	0.193535	NC	UNC50_DROME	Protein unc-50 homolog
cluster_contig220	1.13264	0.0117395	UP	0.194638	0.754461	NC	0.948979	0.0426241	NC	HEAT1_HUMAN	HEAT repeat-containing protein 1
cluster_contig2211	-1.37859	0.00280592	DOWN	-1.16231	0.0145576	DOWN	-0.20164	0.783968	NC	LRC24_HUMAN	Leucine-rich repeat-containing protein 24
cluster_contig2214	0	1	NC	-1.80716	0.000779301	DOWN	2.53199	9.68e-06	UP
cluster_contig2215	-1.40229	0.00108961	DOWN	-0.259591	0.665792	NC	-1.12903	0.0106045	DOWN	PUM_DROME	Maternal protein pumilio
cluster_contig2219	-1.67682	7.22e-05	DOWN	0.574146	0.255453	NC	-2.23512	1.08e-07	DOWN	FRI_AEDAE	Ferritin subunit
cluster_contig2222	0.308841	0.708184	NC	7.17414	1.35e-09	UP	-6.75712	7.41e-08	NC	DNAT_DROME	Dopamine N-acetyltransferase {ECO:0000312|EMBL:AAF47172.1}
cluster_contig2223	-1.30623	0.00285582	DOWN	-0.27048	0.668189	NC	-1.02002	0.0231226	NC	DNAT_DROME	Dopamine N-acetyltransferase {ECO:0000312|EMBL:AAF47172.1}
cluster_contig2230	-1.25442	0.0134951	DOWN	1.11984	0.0401489	UP	-2.36323	1.44e-06	DOWN	OFUT1_DROME	GDP-fucose protein O-fucosyltransferase 1
cluster_contig2232	0.695914	0.198955	NC	1.44395	0.00500647	UP	-0.735185	0.209662	NC	FRU_DROME	Sex determination protein fruitless
cluster_contig2235	-7.99706	3.67e-14	DOWN	0	1	NC	-2.16064	6.85e-05	NC	GRIK2_HUMAN	Glutamate receptor ionotropic, kainate 2
cluster_contig2245	1.58317	0.000203376	UP	1.90105	7.01e-06	NC	-0.294206	0.587836	NC	SPG7_MOUSE	Paraplegin
cluster_contig2250	-2.29607	8.79e-07	DOWN	-0.0127135	0.9177	NC	-2.26627	7.08e-06	DOWN	PANG1_DROME	Protein pangolin, isoforms A/H/I/S
cluster_contig2252	1.63519	0.000292655	UP	0.838998	0.0984792	NC	0.815026	0.103508	NC	DPH3_DROME	DPH3 homolog
cluster_contig2255	-0.747837	0.105006	NC	0.525187	0.304377	NC	-1.26077	0.0036284	DOWN	UBIQP_GEOCY	Polyubiquitin
cluster_contig2265	1.18007	0.0734316	NC	-1.17742	0.0228761	DOWN	2.37276	1.44e-05	NC	SAE2_XENTR	SUMO-activating enzyme subunit 2
cluster_contig2269	7.01606	3.83e-09	NC	-4.15927	1.01e-18	NC	11.0798	3.22e-36	UP	XP_015112702.1	PREDICTED: uncharacterized protein LOC107038231 [Diachasma alloeum]
cluster_contig2273	-0.680548	0.171166	NC	1.14811	0.0235312	UP	-1.81258	9.41e-05	DOWN	SMC4_XENLA	Structural maintenance of chromosomes protein 4
cluster_contig2275	-0.254283	0.689676	NC	-1.55022	0.000958323	DOWN	1.31294	0.00573285	UP
cluster_contig2276	0.842765	0.146015	NC	-0.736009	0.255452	NC	1.58642	0.00404735	UP	NAC3_RAT	Sodium/calcium exchanger 3
cluster_contig2282	-0.895238	0.0494772	NC	1.55938	0.000363244	UP	-2.45021	1.04e-08	DOWN	DIHR_ACHDO	Diuretic hormone receptor
cluster_contig2294	-0.385709	0.570822	NC	-2.45902	1.72e-07	DOWN	2.08483	5.83e-06	UP	XP_015111904.1	PREDICTED: uncharacterized protein LOC107037721 [Diachasma alloeum]
cluster_contig2296	-1.26809	0.00336581	DOWN	-1.83745	1.51e-05	DOWN	0.58129	0.232523	NC	NIT2_RAT	Omega-amidase NIT2
cluster_contig2306	-1.13441	0.0118863	DOWN	-0.430837	0.442501	NC	-0.690707	0.160433	NC	H2B_DROYA	Histone H2B
cluster_contig2307	0	1	NC	-7.08468	6.19e-09	DOWN	2.96208	0.000103116	NC
cluster_contig2308	-1.31222	0.0233686	DOWN	-1.47122	0.00903408	DOWN	0.171873	0.789336	NC	TIA1_HUMAN	Nucleolysin TIA-1 isoform p40
cluster_contig2310	0.899884	0.144409	NC	-0.796344	0.129976	NC	1.70848	0.00146868	UP	CRTC1_MOUSE	CREB-regulated transcription coactivator 1
cluster_contig2311	-1.84031	0.00019009	NC	7.0231	6.19e-09	NC	-8.74302	1.05e-18	DOWN	WDR82_DROME	WD repeat-containing protein 82 {ECO:0000250|UniProtKB:Q6UXN9}
cluster_contig2313	-9.14909	8.8e-22	DOWN	0	1	NC	-9.05043	8.27e-21	DOWN	GATB_CULQU	Glutamyl-tRNA(Gln) amidotransferase subunit B, mitochondrial {ECO:0000255|HAMAP-Rule:MF_03147}
cluster_contig2316	-8.1431	4.89e-15	DOWN	0	1	NC	-1.1412	0.0548966	NC	RIBC2_HUMAN	RIB43A-like with coiled-coils protein 2
cluster_contig2322	-0.956411	0.0320163	NC	0.457525	0.387341	NC	-1.4067	0.00106559	DOWN	RAS3_DROME	Ras-like protein 3
cluster_contig2332	-0.667788	0.168465	NC	-1.00961	0.0297286	DOWN	0.350667	0.516403	NC	POMT2_DROPS	Protein O-mannosyl-transferase 2
cluster_contig2335	-1.06494	0.0382552	DOWN	-0.662024	0.267062	NC	-0.391307	0.548377	NC	K0556_MOUSE	Uncharacterized protein KIAA0556
cluster_contig2337	-1.10542	0.0276519	NC	7.32797	2.4e-10	UP	-8.32691	5.48e-16	NC	MRJP1_APIME	Major royal jelly protein 1
cluster_contig2344	-0.519774	0.311579	NC	-1.28557	0.00519609	DOWN	0.777448	0.115831	NC	GLT35_DROME	Polypeptide N-acetylgalactosaminyltransferase 35A
cluster_contig2347	1.65102	0.000463828	UP	-0.470923	0.428484	NC	2.12541	5.51e-06	UP	5NTC_PONAB	Cytosolic purine 5'-nucleotidase
cluster_contig2353	-0.988995	0.101074	NC	7.03426	4.54e-09	NC	-7.91408	1.68e-13	DOWN	ZFP90_MOUSE	Zinc finger protein 90
cluster_contig2361	0	1	NC	-2.00608	0.00192139	DOWN	-0.295009	0.707328	NC	ADAS_HUMAN	Alkyldihydroxyacetonephosphate synthase, peroxisomal
cluster_contig2362	0.924524	0.0438816	NC	-0.18695	0.771612	NC	1.12238	0.0129313	UP	AMRA1_MOUSE	Activating molecule in BECN1-regulated autophagy protein 1
cluster_contig2363	-1.31816	0.0144753	DOWN	0	1	NC	-0.967874	0.119023	NC	SIF1_DROME	Protein still life, isoform SIF type 1
cluster_contig2364	0.356626	0.504459	NC	1.08644	0.0178493	UP	-0.715632	0.139111	NC	ALKB8_XENTR	Alkylated DNA repair protein alkB homolog 8
cluster_contig2366	-0.386506	0.593322	NC	7.28662	3.18e-10	UP	-7.55278	1.46e-11	NC	OSP_DROME	Protein outspread
cluster_contig2369	-2.20553	0.000167239	DOWN	0	1	NC	-3.55918	6.05e-08	DOWN
cluster_contig237	-0.521469	0.388332	NC	-1.62599	0.000582922	DOWN	1.11292	0.0193906	UP	SNMP1_APIME	Sensory neuron membrane protein 1 {ECO:0000303|PubMed:18342246}
cluster_contig2371	-1.69638	0.000380902	DOWN	-1.06159	0.0641184	NC	-0.626491	0.191258	NC	PAKM_DROME	Serine/threonine-protein kinase PAK mbt
cluster_contig2381	-1.9166	0.000864984	DOWN	-1.82064	0.00270165	NC	-0.0839235	0.8759	NC
cluster_contig2385	-0.29401	0.592382	NC	-2.21948	1.74e-07	DOWN	1.94452	4.5e-06	UP	TRR_DROME	Histone-lysine N-methyltransferase trr
cluster_contig2394	-0.835674	0.0653109	NC	5.71069	3.27e-31	UP	-6.53644	5.01e-38	DOWN	CP020795.1	Oryzias latipes strain HNI chromosome 17
cluster_contig2410	0.265738	0.648201	NC	-0.945733	0.0441503	NC	1.21965	0.00690625	UP	VPS29_MOUSE	Vacuolar protein sorting-associated protein 29
cluster_contig2416	-1.679	0.000780724	DOWN	0	1	NC	-2.36611	1.49e-05	DOWN	TRET1_BOMMO	Facilitated trehalose transporter Tret1 {ECO:0000303|PubMed:20035867}
cluster_contig2418	0.99601	0.130174	NC	1.41352	0.0173888	UP	0	1	NC
cluster_contig2419	1.3832	0.0247774	UP	0.413081	0.661218	NC	0	1	NC
cluster_contig242	0.369651	0.643796	NC	-1.46833	0.00412785	NC	1.85439	0.000344346	UP
cluster_contig2422	3.48001	8.81e-12	NC	2.31884	4.57e-06	UP	0	1	NC	POL2_DROME	Retrovirus-related Pol polyprotein from transposon 297
cluster_contig2427	0.219946	0.752781	NC	1.39427	0.0126006	UP	-1.16793	0.0503263	NC	TPC10_DROME	Trafficking protein particle complex subunit 10
cluster_contig2428	0.0944631	0.90594	NC	1.01022	0.0436413	UP	-0.907839	0.0694634	NC	COPIA_DROME	Copia protein
cluster_contig2429	-3.81627	1.47e-06	DOWN	0	1	NC	-0.686371	0.253404	NC	OR9A	Odorant receptor 9a
cluster_contig2433	-1.10686	0.0116595	DOWN	-0.342155	0.542318	NC	-0.750734	0.109488	NC	LRC58_XENLA	Leucine-rich repeat-containing protein 58
cluster_contig2437	-1.58532	0.00192335	DOWN	2.14113	0.0101986	NC	-3.70707	1.43e-08	NC	ETS1B_XENLA	Protein c-ets-1-B
cluster_contig2438	-0.884746	0.0649193	NC	0.144209	0.828565	NC	-1.01949	0.0301326	DOWN	DPOE1_MOUSE	DNA polymerase epsilon catalytic subunit A
cluster_contig2443	0.807357	0.0986849	NC	1.87799	0.000108578	UP	-1.0546	0.049936	DOWN	FBXL7_MOUSE	F-box/LRR-repeat protein 7
cluster_contig2445	-1.98012	3.35e-06	DOWN	-0.89684	0.0572074	NC	-1.0692	0.0180259	DOWN	SPB1_CHICK	pre-rRNA processing protein FTSJ3 {ECO:0000255|HAMAP-Rule:MF_03163}
cluster_contig2454	-1.40156	0.00411368	DOWN	0.683499	0.311109	NC	-2.07266	5.07e-05	DOWN
cluster_contig2457	-0.185257	0.826622	NC	1.07806	0.0439114	NC	-1.25099	0.0171776	DOWN	OSBL9_XENTR	Oxysterol-binding protein-related protein 9
cluster_contig2465	-0.629075	0.263186	NC	0.827325	0.0997182	NC	-1.4448	0.00206935	DOWN
cluster_contig2466	-4.98845	1.87e-20	DOWN	-5.2012	4.93e-22	DOWN	0.221857	0.701469	NC	IKBE_MOUSE	NF-kappa-B inhibitor epsilon
cluster_contig2467	-0.437238	0.415844	NC	0.710558	0.163426	NC	-1.13622	0.0140681	DOWN	MYCC_BACIU	Mycosubtilin synthase subunit C
cluster_contig2469	-2.89522	1.02e-07	DOWN	0	1	NC	-1.68064	0.00119349	DOWN
cluster_contig2481	-0.27493	0.679356	NC	-1.57203	0.00100383	DOWN	1.30571	0.00594463	UP	FBXL2_BOVIN	F-box/LRR-repeat protein 2 {ECO:0000305}
cluster_contig2483	3.64904	1.55e-13	UP	0.213254	0.779347	NC	3.4479	4.35e-12	UP	IP6K3_HUMAN	Inositol hexakisphosphate kinase 3
cluster_contig2488	0.235835	0.723956	NC	1.58657	0.0023637	UP	-1.33633	0.0125822	NC
cluster_contig249	0	1	NC	-6.56311	1.76e-33	DOWN	4.90421	8.69e-24	UP	COL3A1	collagen, type III, alpha
cluster_contig2496	-0.244936	0.736804	NC	1.17303	0.0148404	UP	-1.40163	0.00331357	NC
cluster_contig2499	-1.37363	0.00136663	DOWN	0.644695	0.198413	NC	-2.00665	2.2e-06	DOWN
cluster_contig2500	1.07967	0.0235394	UP	0.0387589	0.969875	NC	1.04967	0.0304226	UP	SCNA_DROME	Sodium channel protein para
cluster_contig2503	-1.25071	0.00422538	DOWN	-0.652101	0.192705	NC	-0.588816	0.225915	NC	TPC1_RAT	Two pore calcium channel protein 1
cluster_contig2516	0.686924	0.151081	NC	1.02715	0.0234913	UP	-0.333125	0.53709	NC
cluster_contig2517	-0.145104	0.813549	NC	-1.0769	0.0213119	DOWN	0.943764	0.0460142	NC	ROUGH_DROME	Homeobox protein rough
cluster_contig2518	-0.671751	0.234645	NC	0.556168	0.43259	NC	-1.21288	0.0290893	DOWN
cluster_contig252	-1.14878	0.0100031	DOWN	-1.45045	0.00104424	DOWN	0.314031	0.574678	NC	MTX2_MOUSE	Metaxin-2
cluster_contig2522	-2.08525	0.000146349	NC	0	1	NC	-2.77991	6.39e-06	DOWN
cluster_contig2523	-1.21685	0.0114226	DOWN	-0.286241	0.680284	NC	-0.917361	0.0718161	NC	NDUB7_CAEEL	NADH dehydrogenase [ubiquinone] 1 beta subcomplex subunit 7
cluster_contig2524	2.02953	1.64e-05	UP	1.03796	0.0329722	UP	0.997181	0.0647455	NC
cluster_contig2526	-1.74528	0.000236584	DOWN	-2.32835	5.53e-07	DOWN	0.585959	0.276166	NC	LUCI_LUCMI	Luciferin 4-monooxygenase
cluster_contig2531	-1.27564	0.00385421	DOWN	2.273	6.53e-07	UP	-3.53336	9.79e-15	DOWN	XP_015114362.1	PREDICTED: uncharacterized protein LOC107039319 [Diachasma alloeum]
cluster_contig2537	1.03046	0.0457045	NC	-0.127868	0.821048	NC	1.17091	0.018898	UP	WDR7_HUMAN	WD repeat-containing protein 7
cluster_contig254	-1.17424	0.00928602	DOWN	-0.824305	0.0910957	NC	-0.337056	0.555968	NC	UFM1_AEDAE	Ubiquitin-fold modifier 1
cluster_contig2540	0	1	NC	-0.814123	0.23503	NC	7.09784	2.9e-09	UP
cluster_contig2546	-1.23766	0.012029	DOWN	-0.489549	0.494623	NC	-0.73886	0.143224	NC
cluster_contig2549	-0.204323	0.720693	NC	0.906269	0.048519	NC	-1.09891	0.0125418	DOWN	VWA9_XENTR	von Willebrand factor A domain-containing protein 9
cluster_contig255	-7.64077	4.13e-12	DOWN	-7.66399	1.02e-11	NC	0.0312046	0.982966	NC
cluster_contig2553	1.28918	0.00933992	UP	0.137923	0.783232	NC	1.16076	0.0322601	UP	SUWA_DROME	Protein suppressor of white apricot
cluster_contig2555	-1.99992	3.08e-06	DOWN	-2.47065	9.35e-09	DOWN	0.478772	0.347908	NC	PICK1_RAT	PRKCA-binding protein
cluster_contig2563	0.820292	0.0833864	NC	1.31177	0.00378805	UP	-0.478649	0.362155	NC	CSKP_DROME	Peripheral plasma membrane protein CASK
cluster_contig2568	-2.10695	0.000105807	DOWN	-1.67088	0.00565153	DOWN	-0.427363	0.411175	NC	MSTAA_DROME	Protein msta, isoform A
cluster_contig2571	1.41407	0.00181942	UP	0.190302	0.780727	NC	1.23606	0.00843938	UP	JING_AEDAE	Zinc finger protein jing homolog
cluster_contig2575	-1.92318	4.97e-06	DOWN	-1.64563	0.000122381	DOWN	-0.266072	0.637169	NC	FA32A_XENTR	Protein FAM32A
cluster_contig2576	-2.94961	2.05e-07	DOWN	0	1	NC	-4.5506	1.89e-11	NC	DORS_DROME	Embryonic polarity protein dorsal
cluster_contig2577	-0.11555	0.877178	NC	1.15866	0.0167976	UP	-1.26537	0.00827631	DOWN	CL190_DROME	Restin homolog
cluster_contig2578	0.108025	0.880178	NC	1.48541	0.00192802	UP	-1.36515	0.00466908	NC	RPB11_DROME	DNA-directed RNA polymerase II subunit RPB11
cluster_contig258	-1.04356	0.0735766	NC	0	1	NC	-2.66788	2.76e-05	DOWN
cluster_contig2580	-1.00674	0.0236205	DOWN	-0.679374	0.164059	NC	-0.316164	0.564322	NC	RHPN2_HUMAN	Rhophilin-2
cluster_contig2581	-0.373088	0.477858	NC	0.707501	0.143082	NC	-1.07002	0.0161998	DOWN	HDAC4_HUMAN	Histone deacetylase 4
cluster_contig2589	-1.91189	0.000148269	NC	-2.54012	2.73e-07	DOWN	0.64143	0.238067	NC	RGS_DROME	Regulator of G-protein signaling loco
cluster_contig2591	0.61406	0.202521	NC	-0.579179	0.250283	NC	1.20184	0.00621593	UP	CP4C1_BLADI	Cytochrome P450 4C1
cluster_contig2593	-7.32929	1.55e-10	DOWN	0	1	NC	-1.44844	0.00933343	DOWN	DDX19_DROME	DEAD-box helicase Dbp80
cluster_contig2594	0.0266569	0.970057	NC	1.25119	0.00436991	UP	-1.2143	0.00528902	DOWN	PGM2_HUMAN	Phosphoglucomutase-2
cluster_contig2596	1.23861	0.0257401	UP	1.20516	0.0493452	UP	0	1	NC
cluster_contig2604	1.54202	0.000563394	UP	2.86067	1.61e-10	NC	-1.30142	0.00630826	NC	RXR_LYMST	Retinoic acid receptor RXR {ECO:0000250|UniProtKB:Q8T5C6}
cluster_contig261	-2.76412	8.32e-11	DOWN	-1.11881	0.0127508	DOWN	-1.63105	0.000136095	DOWN	KPC4_DROME	Putative protein kinase C delta type homolog
cluster_contig2610	1.08702	0.0169636	UP	0.726021	0.155734	NC	0.371461	0.497088	NC	NRDC_MOUSE	Nardilysin
cluster_contig2616	-4.66358	3.35e-20	NC	-2.34637	2.49e-05	NC	-2.31008	8.73e-08	DOWN	MESH_BOMMO	Protein mesh {ECO:0000303|PubMed:22854041}
cluster_contig2617	0.26891	0.631076	NC	-0.72646	0.132405	NC	1.00291	0.0261475	UP	TOP2_BOMMO	DNA topoisomerase 2
cluster_contig2618	-2.51206	5.76e-06	DOWN	-1.92072	0.00204895	DOWN	-0.583898	0.229433	NC
cluster_contig2620	-0.205284	0.729334	NC	1.14212	0.0114078	UP	-1.33667	0.00237197	DOWN	XP_015108870.1	PREDICTED: uncharacterized protein LOC107035793 isoform X1 [Diachasma alloeum]
cluster_contig2625	2.37624	3.38e-06	UP	8.69854	5.11e-17	UP	0	1	NC	CHIA_RAT	Acidic mammalian chitinase
cluster_contig2634	-1.2097	0.0188876	DOWN	-0.26028	0.832833	NC	-0.938876	0.0571194	NC	TTL3A_DROME	Tubulin glycylase 3A
cluster_contig2637	-0.461341	0.40202	NC	-1.92775	1.56e-05	DOWN	1.48104	0.0011123	UP	KAT6B_MACFA	Histone acetyltransferase KAT6B
cluster_contig264	-1.16314	0.0170515	DOWN	-1.28295	0.00830864	DOWN	0.131618	0.825664	NC	TRET1_CULQU	Facilitated trehalose transporter Tret1 {ECO:0000250|UniProtKB:Q7PIR5}
cluster_contig2640	8.95027	1.74e-20	UP	8.96215	8.73e-19	UP	0	1	NC	PANG1_DROME	Protein pangolin, isoforms A/H/I/S
cluster_contig2641	-0.920477	0.0398014	NC	-1.01592	0.0243147	DOWN	0.105575	0.869021	NC	GULP1_MOUSE	PTB domain-containing engulfment adapter protein 1
cluster_contig2643	0.932337	0.114854	NC	-1.09426	0.0389961	DOWN	2.03069	9.99e-05	NC	NMD3_PONAB	60S ribosomal export protein NMD3
cluster_contig2647	1.15723	0.0339183	UP	-1.18998	0.0238516	DOWN	2.35734	2.35e-06	UP	CELF2_DANRE	CUGBP Elav-like family member 2
cluster_contig2648	0	1	NC	-0.70268	0.313608	NC	2.56452	0.000165979	UP	S35E3_DANRE	Solute carrier family 35 member E3
cluster_contig2652	-0.662008	0.172999	NC	1.04255	0.030205	UP	-1.69625	0.000145391	DOWN	CAD23_MOUSE	Cadherin-23
cluster_contig2655	-0.0390714	0.968556	NC	1.15023	0.013602	UP	-1.17518	0.010643	DOWN	ZN277_HUMAN	Zinc finger protein 277
cluster_contig2656	-0.593625	0.221391	NC	-1.11461	0.0131589	DOWN	0.533843	0.284639	NC	RTF1_DROME	RNA polymerase-associated protein Rtf1
cluster_contig2658	-2.04905	3.44e-06	DOWN	-1.73375	0.000120694	DOWN	-0.307008	0.578968	NC	TRYT_PIG	Tryptase
cluster_contig2665	3.19125	7.14e-11	NC	1.22813	0.0120721	UP	1.96831	0.000172227	NC	TTKA_DROME	Protein tramtrack, alpha isoform
cluster_contig2666	1.40071	0.00718842	UP	-0.722528	0.189085	NC	2.13428	1.4e-05	UP	COPIA_DROME	Copia protein
cluster_contig2667	0.441599	0.38202	NC	1.23369	0.00495957	UP	-0.787048	0.0879577	NC	ODO1_MACFA	2-oxoglutarate dehydrogenase, mitochondrial
cluster_contig2668	1.07988	0.0169229	UP	1.97857	3.52e-06	NC	-0.896617	0.0486382	NC	ODO1_MACFA	2-oxoglutarate dehydrogenase, mitochondrial
cluster_contig2671	0.641796	0.20249	NC	1.05822	0.034644	UP	-0.403038	0.527233	NC	LOLAL_DROME	Longitudinals lacking protein-like
cluster_contig2672	-1.50202	0.0118194	DOWN	0	1	NC	-1.89232	0.000602871	NC	TM1L2_MOUSE	TOM1-like protein 2
cluster_contig2674	-2.06207	2.21e-06	DOWN	-1.52992	0.00065062	DOWN	-0.521345	0.321562	NC	MOT7_MOUSE	Monocarboxylate transporter 7
cluster_contig2675	-1.21857	0.00695591	DOWN	-1.70041	0.0001152	DOWN	0.495131	0.341314	NC	PIMT_MOUSE	Protein-L-isoaspartate(D-aspartate) O-methyltransferase
cluster_contig2676	1.38296	0.0216299	UP	0.403495	0.59034	NC	0.993876	0.157841	NC	GPDA_DROPS	Glycerol-3-phosphate dehydrogenase [NAD(+)], cytoplasmic
cluster_contig268	-1.00932	0.0232473	DOWN	-0.284989	0.633001	NC	-0.722259	0.122445	NC	BRE4_CAEBR	Beta-1,4-N-acetylgalactosaminyltransferase bre-4
cluster_contig2680	0.0433415	0.960792	NC	1.37291	0.00623982	UP	-1.31815	0.00902671	DOWN
cluster_contig2681	-0.405706	0.443032	NC	-1.28917	0.00373225	DOWN	0.902778	0.047939	NC	CELF2_DANRE	CUGBP Elav-like family member 2
cluster_contig2683	0.671782	0.166208	NC	1.09168	0.0179446	UP	-0.409061	0.453319	NC	ABL_DROME	Tyrosine-protein kinase Abl
cluster_contig269	-1.42207	0.0020368	DOWN	-1.42793	0.0021173	DOWN	0.0147305	0.983301	NC	SV2C_RAT	Synaptic vesicle glycoprotein 2C
cluster_contig2691	1.063	0.0229824	UP	-0.115662	0.881713	NC	1.18756	0.0110103	UP	VPS29_MOUSE	Vacuolar protein sorting-associated protein 29
cluster_contig2692	-1.80707	1.99e-05	DOWN	-1.74386	4.57e-05	DOWN	-0.0464323	0.948947	NC	VPS29_MOUSE	Vacuolar protein sorting-associated protein 29
cluster_contig2693	-1.68692	0.000144169	DOWN	-0.862247	0.0892277	NC	-0.813794	0.0887624	NC	NAV2_HUMAN	Neuron navigator 2
cluster_contig2698	3.77883	7.65e-12	NC	2.08093	9.8e-06	UP	0	1	NC	LARP_DROME	La-related protein 1
cluster_contig270	-1.17512	0.00925667	DOWN	-0.618213	0.233554	NC	-0.549599	0.298563	NC	PSB4_XENLA	Proteasome subunit beta type-4
cluster_contig2707	1.18724	0.00714396	UP	1.24068	0.00545108	UP	-0.0429158	0.95491	NC	DDX46_HUMAN	Probable ATP-dependent RNA helicase DDX46
cluster_contig271	-1.003	0.0233792	DOWN	-0.396694	0.464792	NC	-0.594994	0.219443	NC	MAP12_DANRE	Methionine aminopeptidase 1D, mitochondrial {ECO:0000255|HAMAP-Rule:MF_03174}
cluster_contig2712	1.44969	0.000716215	UP	0.365307	0.510549	NC	1.10407	0.0128203	UP	PYR1_DROME	CAD protein
cluster_contig2717	1.93694	1.65e-05	UP	0.373832	0.478436	NC	1.57305	0.000787811	UP	LAC4_TRAVI	Laccase-4
cluster_contig2726	-1.47718	0.00344317	DOWN	0.996666	0.081447	NC	-2.467	1.4e-06	DOWN	AMPM_MANSE	Membrane alanyl aminopeptidase
cluster_contig2728	0.715154	0.14825	NC	3.4971	3.14e-13	UP	-2.77017	6.09e-09	DOWN	HMDH_BLAGE	3-hydroxy-3-methylglutaryl-coenzyme A reductase
cluster_contig2737	1.54109	0.0223977	UP	0.611696	0.52493	NC	0	1	NC
cluster_contig2738	-1.5729	0.00860921	DOWN	-1.5128	0.0141622	DOWN	-0.0470247	0.981596	NC
cluster_contig2741	-9.34084	4.06e-23	DOWN	-8.55856	3.65e-17	DOWN	-0.775153	0.121368	NC	LRMP_HUMAN	Lymphoid-restricted membrane protein
cluster_contig2742	-0.653768	0.234139	NC	-1.09538	0.0349887	DOWN	0.450117	0.463147	NC	TSTD3_MOUSE	Thiosulfate sulfurtransferase/rhodanese-like domain-containing protein 3
cluster_contig2745	-1.65779	0.000116516	DOWN	-0.198636	0.755825	NC	-1.44461	0.00104015	DOWN	TRYE_DROME	Trypsin epsilon
cluster_contig2751	-1.44161	0.00972344	DOWN	-1.25795	0.035542	DOWN	-0.17743	0.779176	NC
cluster_contig2757	1.53198	0.000480411	UP	1.01312	0.0318781	UP	0.528619	0.308425	NC	SOX6_XENTR	Transcription factor Sox-6 {ECO:0000312|EMBL:AAI61247.1}
cluster_contig2760	-1.10338	0.0124357	DOWN	-1.36249	0.0018489	DOWN	0.266544	0.637363	NC	ACOC_CHICK	Cytoplasmic aconitate hydratase
cluster_contig2765	-1.2744	0.00382981	DOWN	-1.13119	0.0127788	DOWN	-0.130125	0.843901	NC	JUPIT_DROME	Microtubule-associated protein Jupiter {ECO:0000303|PubMed:16518797}
cluster_contig2768	0.666245	0.158377	NC	-0.641722	0.190922	NC	1.31826	0.00234366	UP	SC23A_MOUSE	Protein transport protein Sec23A
cluster_contig2772	-1.94017	6.41e-05	DOWN	-1.59148	0.00148849	DOWN	-0.335493	0.627672	NC	LPD6B_HUMAN	Ly6/PLAUR domain-containing protein 6B
cluster_contig2777	0.161451	0.816333	NC	1.13315	0.0318518	UP	-0.959102	0.0883501	NC	BRE1_DROME	E3 ubiquitin-protein ligase Bre1
cluster_contig2780	-0.456664	0.395648	NC	9.4407	4.04e-22	UP	-9.77484	1.02e-24	NC
cluster_contig2782	7.24373	2.7e-10	UP	2.0634	0.000732103	NC	0	1	NC
cluster_contig2793	-0.0279207	0.973969	NC	-1.51691	0.000679237	NC	1.50518	0.000807388	UP	PYX_DROME	Transient receptor potential channel pyrexia
cluster_contig2795	-2.50952	2.54e-09	DOWN	-1.54045	0.000341369	DOWN	-0.959803	0.0325086	NC	HXK2_DROME	Hexokinase type 2
cluster_contig2796	-1.30411	0.00508941	DOWN	5.53096	3.41e-14	NC	-6.81012	2.39e-22	NC	YI31B_YEAST	Transposon Ty3-I Gag-Pol polyprotein
cluster_contig2797	-0.451822	0.380468	NC	0.79802	0.0870964	NC	-1.23265	0.00459153	DOWN	MED1_AEDAE	Mediator of RNA polymerase II transcription subunit 1
cluster_contig2805	-1.209	0.00748387	DOWN	3.04985	9.17e-08	NC	-4.24114	5.61e-15	NC	PIP1_DROME	1-phosphatidylinositol 4,5-bisphosphate phosphodiesterase classes I and II
cluster_contig2815	-0.601847	0.283956	NC	7.87062	4.88e-12	UP	-8.35823	3.21e-16	DOWN
cluster_contig2823	-1.0622	0.0175326	DOWN	-0.674289	0.171548	NC	-0.370419	0.500282	NC	XP_015118587.1	PREDICTED: uncharacterized protein LOC107042188 [Diachasma alloeum] &gt;XP_015118588.1 PREDICTED: uncharacterized protein LOC107042188 [Diachasma alloeum]
cluster_contig2825	-2.51194	5.68e-09	DOWN	-1.54288	0.000592705	DOWN	-0.964259	0.0310509	NC	PYR1_DROME	CAD protein
cluster_contig2829	-0.790469	0.154565	NC	-1.2379	0.014425	DOWN	0.465434	0.370121	NC	YCX91_PHAAO	Uncharacterized protein ORF91
cluster_contig2843	1.57309	0.000214589	UP	1.29477	0.00295689	NC	0.271992	0.637279	NC	XP_015111715.1	PREDICTED: basic proline-rich protein-like isoform X1 [Diachasma alloeum]
cluster_contig2845	-1.19171	0.0126635	DOWN	0.475197	0.490149	NC	-1.6572	0.000818992	DOWN	TRYE_DROER	Trypsin epsilon
cluster_contig2851	1.26191	0.00633786	UP	-0.373986	0.52589	NC	1.64331	0.000265758	UP	SRP19_DROME	Signal recognition particle 19 kDa protein
cluster_contig2855	0	1	NC	-2.30928	4.73e-06	DOWN	2.16903	1.41e-05	UP	RFX7_HUMAN	DNA-binding protein RFX7
cluster_contig2864	-0.630892	0.185902	NC	0.439011	0.408117	NC	-1.0588	0.0169955	DOWN	MAD1_MOUSE	Max dimerization protein 1
cluster_contig2865	-1.22298	0.00697303	DOWN	0.388839	0.462264	NC	-1.60075	0.000216908	DOWN	DPH1_HUMAN	Diphthamide biosynthesis protein 1
cluster_contig2866	1.25278	0.0282933	UP	1.34571	0.0155393	UP	0	1	NC
cluster_contig2870	-1.04645	0.0182078	DOWN	-0.884233	0.0577085	NC	-0.150677	0.803907	NC	RBL1_MOUSE	Retinoblastoma-like protein 1
cluster_contig2871	-0.336789	0.596877	NC	-1.22898	0.011454	DOWN	0.904203	0.0654613	NC	CHAO_DROME	Chaoptin
cluster_contig2874	-1.58877	0.000197509	DOWN	-0.765436	0.111618	NC	-0.809372	0.0789449	NC	MD12L_HUMAN	Mediator of RNA polymerase II transcription subunit 12-like protein
cluster_contig2876	0	1	NC	-2.398	4.61e-06	DOWN	3.20185	1.61e-08	NC	MTOR_MOUSE	Serine/threonine-protein kinase mTOR
cluster_contig2886	-1.38635	0.00181358	DOWN	-0.766039	0.120775	NC	-0.612812	0.231966	NC	UDB17_RAT	UDP-glucuronosyltransferase 2B17
cluster_contig2888	1.78449	6.8e-05	UP	-0.730438	0.137024	NC	2.5324	1.07e-08	UP	BRC1_DROME	Broad-complex core protein isoforms 1/2/3/4/5
cluster_contig2896	-1.26996	0.00338401	DOWN	-0.288588	0.623833	NC	-0.970816	0.0312876	NC	PPAN_DROME	Protein Peter pan
cluster_contig2898	-1.86878	4.47e-05	NC	-0.618021	0.306761	NC	-1.24245	0.00802021	DOWN	WWOX_DROME	WW domain-containing oxidoreductase
cluster_contig2900	0.108392	0.860602	NC	-1.08058	0.0158573	DOWN	1.20577	0.00573285	UP	PLB1_MONDO	Phospholipase B1, membrane-associated
cluster_contig2909	0.516182	0.31283	NC	-0.74386	0.129268	NC	1.27621	0.00417939	UP	UBP34_HUMAN	Ubiquitin carboxyl-terminal hydrolase 34
cluster_contig291	-0.103636	0.878742	NC	-1.306	0.00447637	DOWN	1.2103	0.0092779	UP	RN168_XENTR	E3 ubiquitin-protein ligase RNF168
cluster_contig2913	-0.157197	0.799644	NC	1.40513	0.00282536	UP	-1.55395	0.000688326	DOWN	PHR_POTTR	Deoxyribodipyrimidine photo-lyase
cluster_contig2921	-2.07221	6.44e-06	NC	-0.495064	0.524023	NC	-1.56847	0.000367393	DOWN	LOXL4_BOVIN	Lysyl oxidase homolog 4
cluster_contig2924	2.10418	0.00136862	NC	7.11433	1.82e-09	UP	0	1	NC	LPHN_DROAN	Latrophilin Cirl {ECO:0000250|UniProtKB:A1Z7G7}
cluster_contig294	1.08497	0.0253722	UP	0.106375	0.89216	NC	0.991646	0.0502135	NC
cluster_contig2940	-1.05038	0.0170289	DOWN	-0.870298	0.0601307	NC	-0.173123	0.771871	NC	HECD1_HUMAN	E3 ubiquitin-protein ligase HECTD1
cluster_contig2942	2.35214	0.000127643	NC	-1.30376	0.0123637	DOWN	3.67009	9.29e-11	NC	EVI5_DROME	Ecotropic viral integration site 5 ortholog
cluster_contig2948	-0.49771	0.326981	NC	0.842285	0.0744838	NC	-1.33313	0.00237143	DOWN	XPF_DROME	DNA repair endonuclease XPF
cluster_contig2949	-4.15708	1.49e-18	DOWN	-1.82898	0.00025685	NC	-2.3098	7.75e-08	NC	PKHG4_HUMAN	Puratrophin-1
cluster_contig295	0.359152	0.493444	NC	1.21161	0.00603784	UP	-0.842345	0.0661004	NC	UBE4A_HUMAN	Ubiquitin conjugation factor E4 A {ECO:0000305}
cluster_contig2950	-1.68649	0.000595345	DOWN	-1.53765	0.00246605	DOWN	-0.138757	0.885724	NC	HIG1A_MOUSE	HIG1 domain family member 1A, mitochondrial
cluster_contig2956	-0.398266	0.480305	NC	-3.2131	4.36e-13	NC	2.83277	1.29e-10	UP	MTOR_MOUSE	Serine/threonine-protein kinase mTOR
cluster_contig2958	-1.05337	0.0165756	DOWN	0.0972339	0.891364	NC	-1.14072	0.00931496	DOWN	PLST_RAT	Plastin-3
cluster_contig2959	0.747688	0.159993	NC	-0.985033	0.0452828	NC	1.74625	0.0001908	UP
cluster_contig2960	-10.171	1.91e-29	DOWN	-8.17078	8.91e-15	DOWN	-2.00453	1.76e-05	DOWN	HTS_DROME	Protein hu-li tai shao
cluster_contig2969	-7.50076	2.42e-11	DOWN	0	1	NC	-7.40151	9.16e-11	DOWN	QIN_AVIS3	Transforming protein Qin
cluster_contig2970	1.8465	7.03e-05	NC	2.03321	1.88e-05	UP	-0.172442	0.843218	NC	CI_DROYA	Protein cubitus interruptus
cluster_contig2974	-1.34284	0.00173701	DOWN	0.353589	0.52939	NC	-1.68208	7.32e-05	NC	STUB_DROME	Serine proteinase stubble
cluster_contig2975	-2.17908	2.92e-07	DOWN	0.185334	0.812181	NC	-2.35021	6.52e-08	NC	STUB_DROME	Serine proteinase stubble
cluster_contig2979	0.889071	0.0768745	NC	1.07634	0.0351453	UP	-0.175453	0.824474	NC	ELF1_DROME	Protein grainyhead
cluster_contig298	-2.09954	0.000234501	DOWN	0	1	NC	-1.28151	0.0213672	DOWN	YTHD2_MOUSE	YTH domain-containing family protein 2
cluster_contig2983	-0.730785	0.125753	NC	-1.05016	0.0234522	DOWN	0.325142	0.561182	NC	TBCD9_HUMAN	TBC1 domain family member 9
cluster_contig2996	0.261072	0.725188	NC	7.74804	2.27e-11	UP	-7.37764	1.2e-10	DOWN	CPMD8_HUMAN	C3 and PZP-like alpha-2-macroglobulin domain-containing protein 8
cluster_contig2997	0.66211	0.20062	NC	1.96724	4.66e-05	UP	-1.29033	0.0117315	DOWN
cluster_contig2998	0	1	NC	-3.05405	1.96e-07	NC	8.46381	1.34e-16	UP	NBEA_DROME	Neurobeachin
cluster_contig300	1.9015	1.86e-05	UP	0.665854	0.197837	NC	1.24782	0.00767004	UP	4ET_MOUSE	Eukaryotic translation initiation factor 4E transporter
cluster_contig3005	-2.44664	7.54e-08	DOWN	-0.937066	0.0978649	NC	-1.49448	0.000668493	NC	SOS_DROME	Protein son of sevenless
cluster_contig3009	0.0221474	0.976023	NC	1.20649	0.00611872	UP	-1.17466	0.00709227	DOWN	TRET1_CULQU	Facilitated trehalose transporter Tret1 {ECO:0000250|UniProtKB:Q7PIR5}
cluster_contig301	-0.36478	0.504834	NC	0.881536	0.06495	NC	-1.23576	0.00604718	DOWN	GSHB_XENLA	Glutathione synthetase
cluster_contig3010	-1.58118	0.00023462	NC	0.699727	0.190127	NC	-2.2654	2.18e-07	DOWN	TRET1_CULQU	Facilitated trehalose transporter Tret1 {ECO:0000250|UniProtKB:Q7PIR5}
cluster_contig3020	-1.07128	0.0186574	DOWN	1.16909	0.019639	UP	-2.22662	1.04e-06	DOWN	MICA3_HUMAN	Protein-methionine sulfoxide oxidase MICAL3
cluster_contig3023	-1.20797	0.0309841	DOWN	-0.988302	0.110063	NC	-0.213356	0.784978	NC
cluster_contig3028	-0.517038	0.295281	NC	0.535936	0.296194	NC	-1.04396	0.0192865	DOWN	CC033_HUMAN	Protein C3orf33
cluster_contig3034	1.10061	0.0173345	UP	1.28515	0.0101361	UP	-0.168114	0.878243	NC	KI13A_MOUSE	Kinesin-like protein KIF13A
cluster_contig3037	-1.80354	3.19e-05	DOWN	-0.55459	0.292448	NC	-1.23223	0.00718283	DOWN	ITA8_CHICK	Integrin alpha-8
cluster_contig3038	1.27683	0.00460274	UP	0.112136	0.869011	NC	1.17238	0.0113468	UP	MCTP1_HUMAN	Multiple C2 and transmembrane domain-containing protein 1
cluster_contig305	-0.349069	0.676054	NC	-1.33652	0.0148056	DOWN	0.996403	0.0699147	NC
cluster_contig3052	-1.6445	0.00312779	NC	0	1	NC	-1.00434	0.0470598	DOWN	RP147_VACCA	DNA-directed RNA polymerase 147 kDa polypeptide
cluster_contig3058	-2.3019	6.25e-06	DOWN	-1.93441	0.000396815	DOWN	-0.360267	0.539801	NC
cluster_contig3063	1.34336	0.00456235	NC	1.84982	8.8e-05	UP	-0.498485	0.395192	NC	GDPD1_RAT	Glycerophosphodiester phosphodiesterase domain-containing protein 1
cluster_contig3074	0.181565	0.760064	NC	-0.858714	0.0674172	NC	1.05089	0.0192337	UP	IMP4_BOVIN	U3 small nucleolar ribonucleoprotein protein IMP4
cluster_contig3076	-1.34629	0.0016937	DOWN	-0.863309	0.0626306	NC	-0.468153	0.354105	NC	FAH2A_HUMAN	Fumarylacetoacetate hydrolase domain-containing protein 2A
cluster_contig3078	-0.236522	0.683347	NC	-1.45827	0.000979869	DOWN	1.23363	0.0059166	UP	UBN2_BOVIN	Ubinuclein-2
cluster_contig3085	-3.60408	1.29e-13	DOWN	-2.31304	3.97e-06	DOWN	-1.27508	0.00763606	DOWN	ATG4B_XENLA	Cysteine protease ATG4B
cluster_contig3088	1.0063	0.0336632	UP	-0.462729	0.428989	NC	1.47943	0.00124268	UP	SAHH3_HUMAN	Putative adenosylhomocysteinase 3
cluster_contig3102	-0.448632	0.374143	NC	1.04486	0.0224859	UP	-1.48284	0.000620013	DOWN	XP_015122036.1	PREDICTED: guanylate cyclase 32E-like isoform X1 [Diachasma alloeum]
cluster_contig3114	-1.49096	0.000582251	DOWN	-0.309388	0.608446	NC	-1.16856	0.00878683	DOWN	LS12A_DANRE	Protein LSM12 homolog A
cluster_contig3116	2.52323	9.06e-08	UP	0.67895	0.158983	NC	1.8555	0.000196332	UP	TAF1_DROME	Transcription initiation factor TFIID subunit 1
cluster_contig3117	8.04554	1.31e-14	NC	-2.19102	1.27e-06	NC	10.1437	8.91e-29	UP	KDM4B_DROME	Probable lysine-specific demethylase 4B
cluster_contig3118	-1.53468	0.000957512	DOWN	-0.620339	0.30906	NC	-0.901272	0.0585674	NC	OR13A	Odorant receptor 13a
cluster_contig3125	0.797109	0.127134	NC	-0.23907	0.732361	NC	1.04572	0.0418846	UP
cluster_contig3135	-0.040016	0.986957	NC	1.58193	0.0196654	UP	-1.60412	0.0197033	NC	TIM16_DROME	Mitochondrial import inner membrane translocase subunit Tim16
cluster_contig314	1.66211	0.000163516	UP	1.02402	0.0295585	UP	0.650314	0.206357	NC	ZN713_HUMAN	Zinc finger protein 713
cluster_contig3145	-0.1003	0.883329	NC	-1.04729	0.0257994	DOWN	0.954411	0.0415471	NC	XP_015116095.1	PREDICTED: centromere-associated protein E-like [Diachasma alloeum] &gt;XP_015116096.1 PREDICTED: centromere-associated protein E-like [Diachasma alloeum] &gt;XP_015116097.1 PREDICTED: centromere-associated protein E-like [Diachasma alloeum]
cluster_contig316	0	1	NC	-0.457092	0.518201	NC	2.56261	3.06e-05	UP
cluster_contig3164	-1.22225	0.00660452	DOWN	-0.633642	0.230903	NC	-0.575665	0.252029	NC	AURKB_DROME	Aurora kinase B
cluster_contig3169	1.55463	0.0105381	UP	0.850161	0.277009	NC	0	1	NC
cluster_contig317	1.67916	0.000133835	UP	-0.00212302	1	NC	1.69234	0.000125987	UP	AT8B2_HUMAN	Phospholipid-transporting ATPase ID
cluster_contig3175	0.36757	0.484658	NC	1.37908	0.00153882	UP	-1.00723	0.0247325	DOWN	ZN362_HUMAN	Zinc finger protein 362
cluster_contig3187	0.870016	0.053752	NC	1.24597	0.00453988	UP	-0.36582	0.490348	NC	VMP03_EULPE	Venom metalloproteinase 3
cluster_contig3189	1.33758	0.00330122	UP	-0.0606843	0.940271	NC	1.4111	0.00193642	UP
cluster_contig3191	1.18685	0.00685998	UP	0.359466	0.521955	NC	0.843465	0.0684839	NC	MTMRE_HUMAN	Myotubularin-related protein 14
cluster_contig32	1.12041	0.0133433	NC	11.1229	4.43e-35	UP	-9.88348	1.53e-25	NC	SL9A8_HUMAN	Sodium/hydrogen exchanger 8
cluster_contig3200	-1.72153	0.000382448	DOWN	-0.350516	0.570403	NC	-1.35753	0.0128129	DOWN
cluster_contig3202	-1.26056	0.0255941	NC	-1.73399	0.00123691	DOWN	0.483686	0.434286	NC
cluster_contig3204	0.00369738	0.999412	NC	-1.55084	0.000376644	DOWN	1.5688	0.000277182	UP	SR140_PONAB	U2 snRNP-associated SURP motif-containing protein
cluster_contig3212	1.8118	2.19e-05	UP	0.97173	0.0334853	NC	0.857371	0.0675775	NC	CABIN_HUMAN	Calcineurin-binding protein cabin-1
cluster_contig3214	-2.21558	5.9e-06	NC	-0.139859	1	NC	-2.06484	3.66e-06	DOWN	P3A2_STRPU	DNA-binding protein P3A2
cluster_contig3219	-0.789337	0.0865948	NC	0.229258	0.713177	NC	-1.01006	0.0250456	DOWN	NKCL_MANSE	Bumetanide-sensitive sodium-(potassium)-chloride cotransporter
cluster_contig322	-2.63335	6.86e-08	NC	-3.70136	2.41e-14	DOWN	1.07475	0.0199905	NC	PSA_MOUSE	Puromycin-sensitive aminopeptidase
cluster_contig3227	0	1	NC	-0.787429	0.157423	NC	3.9262	1.21e-09	UP
cluster_contig3228	-0.57756	0.255134	NC	0.910884	0.0486154	NC	-1.47846	0.000700388	DOWN	NOB1_BOVIN	RNA-binding protein NOB1
cluster_contig323	1.33109	0.00377292	UP	1.76759	5.42e-05	UP	-0.424295	0.388598	NC	AMPM_MANSE	Membrane alanyl aminopeptidase
cluster_contig3230	0	1	NC	-2.99246	8.28e-06	DOWN	0.537176	0.436257	NC
cluster_contig3231	-2.89369	8.49e-11	DOWN	-2.12399	2.46e-06	DOWN	-0.75954	0.119039	NC	MRJP1_APIME	Major royal jelly protein 1
cluster_contig3234	0	1	NC	-1.33679	0.013002	DOWN	1.57371	0.00491819	UP	OR92A	Putative odorant receptor 92a
cluster_contig3235	-0.794515	0.0945104	NC	-1.10564	0.0169356	DOWN	0.320079	0.574077	NC	MBOA7_XENLA	Lysophospholipid acyltransferase 7
cluster_contig3236	0	1	NC	-11.875	4.16e-48	NC	12.4204	3.19e-47	UP	HSP97_STRFN	97 kDa heat shock protein
cluster_contig3237	-0.460995	0.398368	NC	-1.00483	0.0346845	DOWN	0.557214	0.272424	NC	RSP7_CAEEL	Probable splicing factor, arginine/serine-rich 7
cluster_contig3250	-9.87811	3.58e-27	DOWN	-8.73836	2.26e-18	DOWN	-1.13124	0.0212619	DOWN	CYH1_HUMAN	Cytohesin-1
cluster_contig3254	-1.25284	0.0394313	DOWN	-0.679643	0.501927	NC	-0.572711	0.280969	NC	NSMA3_DANRE	Sphingomyelin phosphodiesterase 4
cluster_contig3257	-1.1273	0.0116594	DOWN	-0.368438	0.53168	NC	-0.749103	0.110907	NC	MLXPL_HUMAN	Carbohydrate-responsive element-binding protein
cluster_contig3259	1.28822	0.00702552	UP	-0.00628069	0.999862	NC	1.30687	0.00645785	UP	PSF1_MOUSE	DNA replication complex GINS protein PSF1
cluster_contig3269	4.14323	2.99e-14	UP	2.3486	1.72e-06	UP	0	1	NC	BC035323.1	Mus musculus transmembrane protein 147, mRNA (cDNA clone IMAGE:2654944), complete cds
cluster_contig3271	-0.569012	0.24006	NC	1.20509	0.0065636	UP	-1.77005	2.95e-05	DOWN	A1AT_BOMMO	Antitrypsin
cluster_contig3277	-1.00835	0.0290439	DOWN	-1.1889	0.00978766	DOWN	0.191754	0.753218	NC	TTC14_DROME	Tetratricopeptide repeat protein 14 homolog
cluster_contig328	2.81621	7.2e-11	NC	1.3861	0.001377	UP	1.44588	0.00121684	NC	MEX3B_XENLA	RNA-binding protein MEX3B
cluster_contig3284	-1.56372	0.000325273	DOWN	-1.70396	0.000102521	DOWN	0.150349	0.820474	NC
cluster_contig3289	-0.834874	0.0700821	NC	0.447239	0.40792	NC	-1.2731	0.00390355	DOWN	OSBL9_XENTR	Oxysterol-binding protein-related protein 9
cluster_contig3290	2.66539	1.2e-08	NC	1.3358	0.00341471	UP	1.3421	0.0102094	NC
cluster_contig3293	-1.18323	0.047918	DOWN	0	1	NC	-2.17178	0.00014302	DOWN
cluster_contig3295	-1.51019	0.000800781	DOWN	-0.42992	0.471891	NC	-1.07414	0.0209234	NC	NFYA_RAT	Nuclear transcription factor Y subunit alpha
cluster_contig3305	-0.381508	0.476143	NC	0.769764	0.117404	NC	-1.1429	0.0119889	DOWN	XP_022209689.1	uncharacterized protein DDB_G0271670 isoform X1 [Drosophila obscura]
cluster_contig3310	-1.44949	0.000793663	DOWN	-0.70559	0.156319	NC	-0.741496	0.109858	NC	A4GAT_MOUSE	Lactosylceramide 4-alpha-galactosyltransferase
cluster_contig3333	-1.19399	0.00682099	DOWN	-0.60335	0.231457	NC	-0.581408	0.249943	NC	TRET1_CULQU	Facilitated trehalose transporter Tret1 {ECO:0000250|UniProtKB:Q7PIR5}
cluster_contig3334	-0.207593	0.718821	NC	1.05994	0.0196269	UP	-1.25743	0.00412398	DOWN	ARI1_DANRE	E3 ubiquitin-protein ligase arih1
cluster_contig3335	-0.704885	0.153859	NC	0.980797	0.0445565	NC	-1.67442	0.000197847	DOWN
cluster_contig3339	2.62562	1.13e-06	UP	3.88262	1.23e-10	NC	0	1	NC	DIP2_DROME	Disco-interacting protein 2
cluster_contig335	-2.31591	6.24e-08	DOWN	-1.18434	0.00957055	DOWN	-1.11084	0.0136842	DOWN	PB1_HUMAN	Protein polybromo-1
cluster_contig3352	-0.12604	0.843155	NC	-1.58425	0.000271019	DOWN	1.47346	0.000697783	UP	NU301_DROME	Nucleosome-remodeling factor subunit NURF301
cluster_contig3355	0	1	NC	-1.33458	0.0116761	DOWN	1.08088	0.0488423	UP	SOX6_XENTR	Transcription factor Sox-6 {ECO:0000312|EMBL:AAI61247.1}
cluster_contig3358	-2.13171	1e-05	DOWN	-0.844783	0.211972	NC	-1.27229	0.00643689	NC	GALDH_ARATH	L-galactose dehydrogenase
cluster_contig3363	-1.54641	0.000928881	DOWN	-1.06675	0.0421424	DOWN	-0.474115	0.330353	NC	UBE2H_MOUSE	Ubiquitin-conjugating enzyme E2 H
cluster_contig3364	-1.12808	0.0200675	DOWN	-1.37961	0.0042862	DOWN	0.261237	0.672704	NC
cluster_contig3365	-1.77339	0.000535515	NC	-3.56506	1.43e-13	DOWN	1.79337	0.000101016	NC	MGN2_BOVIN	Protein mago nashi homolog 2
cluster_contig3366	-2.45963	7.01e-06	DOWN	-1.6522	0.00872845	DOWN	-0.795583	0.167757	NC
cluster_contig3372	8.3443	2.14e-16	UP	-0.844152	0.0846794	NC	9.10088	5.77e-21	NC	NETA_DROME	Netrin-A
cluster_contig339	0	1	NC	-1.54734	0.0153739	DOWN	0.646168	0.368791	NC
cluster_contig3396	1.44324	0.00344543	UP	-0.617811	0.25469	NC	2.07343	1.35e-05	UP	STNB_DROME	Protein stoned-B
cluster_contig34	-1.2715	0.00326636	DOWN	-1.0267	0.0231753	DOWN	-0.2344	0.682949	NC	DCAKD_MOUSE	Dephospho-CoA kinase domain-containing protein
cluster_contig3402	-0.746075	0.116393	NC	0.558573	0.290643	NC	-1.29644	0.00370429	DOWN	CYCL_DROME	Protein cycle
cluster_contig3407	-1.32432	0.0023807	DOWN	0.184422	0.789347	NC	-1.49176	0.000652069	DOWN	KDM4B_DROME	Probable lysine-specific demethylase 4B
cluster_contig3410	0	1	NC	-6.16899	1.85e-25	DOWN	4.72914	1.41e-19	NC	YCX91_PHAAO	Uncharacterized protein ORF91
cluster_contig3414	1.17863	0.0258388	UP	-0.198153	0.794992	NC	1.38473	0.00827552	UP
cluster_contig3415	-0.433846	0.393993	NC	-1.65047	0.000113707	DOWN	1.23278	0.00466136	UP	COL3A1	collagen, type III, alpha
cluster_contig3416	0.781284	0.124652	NC	-3.87323	6.8e-18	DOWN	4.66971	1.5e-23	UP	COL3A1	collagen, type III, alpha
cluster_contig342	-1.21518	0.00533236	DOWN	-0.819894	0.0828444	NC	-0.386426	0.463147	NC	NCDN_DROME	Neurochondrin homolog
cluster_contig3420	-1.10231	0.0381142	DOWN	-1.53038	0.00240578	DOWN	0.435053	0.46977	NC	WNT4_MOUSE	Protein Wnt-4
cluster_contig3424	0.0914234	0.899508	NC	-1.02104	0.0530311	NC	1.12327	0.0269409	UP	PEPT1_DROME	Peptide transporter family 1
cluster_contig3425	1.28967	0.00933992	UP	0.450649	0.407153	NC	0.843463	0.142873	NC	YI31B_YEAST	Transposon Ty3-I Gag-Pol polyprotein
cluster_contig3428	1.98918	0.00131157	NC	-1.54443	0.00319488	DOWN	3.54162	2.6e-10	NC	ZDHC2_HUMAN	Palmitoyltransferase ZDHHC2
cluster_contig3432	0	1	NC	-1.4085	0.0128577	DOWN	0.346365	0.645513	NC
cluster_contig3435	-0.0787526	0.923243	NC	-1.05558	0.0328009	DOWN	0.987547	0.0427301	NC	CAC1G_RAT	Voltage-dependent T-type calcium channel subunit alpha-1G
cluster_contig3437	-1.09307	0.0243721	NC	7.8408	7.51e-12	NC	-8.82211	2.98e-19	DOWN	IF4H_PONAB	Eukaryotic translation initiation factor 4H
cluster_contig3446	-11.1337	4.33e-37	DOWN	-10.6088	3.57e-32	NC	-0.516518	0.345973	NC	JHD1_DROME	JmjC domain-containing histone demethylation protein 1
cluster_contig3447	0	1	NC	-1.72383	0.00170148	DOWN	0.889282	0.0938896	NC
cluster_contig3450	-1.35747	0.0151669	DOWN	0	1	NC	-1.16471	0.0238401	DOWN
cluster_contig3457	-1.85065	0.000241352	DOWN	-1.27537	0.0267316	DOWN	-0.571956	0.234379	NC	ACE_DROME	Angiotensin-converting enzyme
cluster_contig3458	-1.63015	0.000230242	DOWN	-1.24266	0.00775589	DOWN	-0.376939	0.478232	NC	RM24_DROME	Probable 39S ribosomal protein L24, mitochondrial
cluster_contig3460	1.28169	0.00417865	UP	0.646995	0.201829	NC	0.646146	0.200619	NC	DLG5_HUMAN	Disks large homolog 5
cluster_contig3461	-0.52844	0.284719	NC	0.507619	0.317745	NC	-1.03318	0.0197071	DOWN	ILK_PONAB	Integrin-linked protein kinase
cluster_contig3463	-1.51757	0.000353591	DOWN	-1.69053	7.2e-05	DOWN	0.186869	0.751127	NC	PNPO_BOVIN	Pyridoxine-5'-phosphate oxidase
cluster_contig3464	0.402753	0.467558	NC	-1.18077	0.00969342	DOWN	1.59179	0.000344346	UP	ZASP_DROME	PDZ and LIM domain protein Zasp
cluster_contig3465	-8.68675	1.51e-18	DOWN	0	1	NC	-8.58794	1.18e-17	DOWN	ZASP_DROME	PDZ and LIM domain protein Zasp
cluster_contig3467	-1.08297	0.0221458	DOWN	-1.54959	0.000712307	DOWN	0.479157	0.374499	NC	TTKB_DROME	Protein tramtrack, beta isoform
cluster_contig3473	-1.44706	0.00198391	DOWN	-0.375672	0.539904	NC	-1.06168	0.034364	DOWN	TPK1_MOUSE	Thiamin pyrophosphokinase 1
cluster_contig3476	2.10106	7.05e-05	UP	0.274021	0.746712	NC	1.83873	0.000875711	UP	JAG1_MOUSE	Protein jagged-1
cluster_contig3480	0.431415	0.416747	NC	-1.10461	0.0155041	DOWN	1.54572	0.000418156	UP	FEM1B_CHICK	Protein fem-1 homolog B
cluster_contig3482	1.42814	0.00121799	UP	1.29632	0.00423257	UP	0.144914	0.82251	NC	ILPR_BRALA	Insulin-like peptide receptor
cluster_contig3483	-1.94781	3.66e-06	DOWN	-1.61422	0.000165941	DOWN	-0.321766	0.5545	NC	SCC4_AEDAE	MAU2 chromatid cohesion factor homolog
cluster_contig3484	-2.40585	2.07e-08	NC	-0.70644	0.155733	NC	-1.68307	0.000127947	DOWN	ARCH_DROME	Protein archease-like
cluster_contig3487	-1.32074	0.00261839	DOWN	1.21147	0.00642784	NC	-2.52955	3.2e-09	NC	P4B_VAR67	Major core protein 4b
cluster_contig3488	-1.53965	0.000298889	DOWN	-0.46465	0.382142	NC	-1.0722	0.0151932	DOWN	NTAN1_HUMAN	Protein N-terminal asparagine amidohydrolase
cluster_contig3491	-1.6153	0.000538781	DOWN	-0.495495	0.441631	NC	-1.10111	0.0209601	NC	GRIK2_HUMAN	Glutamate receptor ionotropic, kainate 2
cluster_contig3492	-2.11225	0.000137734	DOWN	-3.29062	4.77e-10	DOWN	1.19077	0.0164977	UP	GRIK3_RAT	Glutamate receptor ionotropic, kainate 3
cluster_contig3493	-1.52052	0.000460799	NC	9.59826	2.57e-23	NC	-10.999	3.37e-34	DOWN
cluster_contig3496	-2.09966	4.17e-06	DOWN	-1.7859	0.000130905	DOWN	-0.298227	0.647442	NC	CAS_DROME	Transcription factor castor
cluster_contig3498	0	1	NC	-3.8285	1.1e-11	NC	8.56376	1.89e-17	UP	TRIPC_RAT	E3 ubiquitin-protein ligase TRIP12
cluster_contig3499	0.391783	0.491005	NC	-0.988602	0.037137	NC	1.39297	0.00208428	UP	AFAD_MOUSE	Afadin
cluster_contig3502	1.36457	0.00243375	UP	0.603423	0.251922	NC	0.776177	0.116801	NC	ZN235_HUMAN	Zinc finger protein 235
cluster_contig351	-1.13932	0.0818418	NC	-1.20885	0.0475567	DOWN	0.0811973	0.819352	NC	POPD1_CHICK	Blood vessel epicardial substance
cluster_contig3514	-1.19503	0.00756896	DOWN	0.418842	0.499966	NC	-1.60005	0.000392245	DOWN	ASCC1_MOUSE	Activating signal cointegrator 1 complex subunit 1
cluster_contig3520	-0.533671	0.276098	NC	0.719012	0.137429	NC	-1.24046	0.00453731	DOWN	ATX2_DROME	Ataxin-2 homolog
cluster_contig3523	-1.03349	0.0494717	DOWN	-0.152644	0.969408	NC	-0.875009	0.0654605	NC
cluster_contig353	-2.1483	0.000143704	DOWN	0	1	NC	-1.09013	0.052466	NC
cluster_contig3538	-0.763748	0.141296	NC	-1.49403	0.00163287	DOWN	0.747054	0.135787	NC	KYN37712.1	Proteasome subunit alpha type-4 [Trachymyrmex septentrionalis]
cluster_contig3543	0.202394	0.730605	NC	2.7042	1.35e-09	UP	-2.49608	1.87e-08	DOWN	KANK1_HUMAN	KN motif and ankyrin repeat domain-containing protein 1
cluster_contig3546	0.419253	0.414142	NC	1.72323	6.09e-05	UP	-1.29868	0.00298439	DOWN	ABCG4_HUMAN	ATP-binding cassette sub-family G member 4
cluster_contig3549	1.03983	0.019021	UP	0.45415	0.392398	NC	0.596279	0.222351	NC	GYS_DROME	Glycogen [starch] synthase
cluster_contig3550	-0.0823613	0.899424	NC	1.0396	0.028675	UP	-1.11463	0.016198	DOWN	ROCK2_MOUSE	Rho-associated protein kinase 2
cluster_contig3553	-1.377	0.0365481	DOWN	0	1	NC	-7.1253	2.14e-09	DOWN	D10_FOWPN	mRNA-decapping protein D10
cluster_contig3555	-8.10641	8.81e-15	DOWN	-6.73324	1.69e-07	NC	-1.37568	0.00981539	NC
cluster_contig3557	-1.16551	0.00792463	DOWN	-0.523483	0.314404	NC	-0.633307	0.190444	NC	ARL2_DROME	ADP-ribosylation factor-like protein 2
cluster_contig3558	0.429602	0.558301	NC	2.43308	5.13e-05	UP	0	1	NC	DNA2_CHICK	DNA replication ATP-dependent helicase/nuclease DNA2
cluster_contig356	-7.33225	1.55e-10	NC	-8.20707	8.91e-15	DOWN	0.874644	0.159497	NC	RPAB3_MOUSE	DNA-directed RNA polymerases I, II, and III subunit RPABC3
cluster_contig3560	0.0544941	0.954869	NC	-1.51305	0.00226122	DOWN	1.58006	0.00141078	UP	WBP2_HUMAN	WW domain-binding protein 2
cluster_contig3566	-0.933283	0.0739698	NC	8.05376	4.92e-13	UP	-8.86511	1.5e-19	NC	MTU1_DROME	Mitochondrial tRNA-specific 2-thiouridylase 1
cluster_contig3568	-1.55978	0.000277165	DOWN	-0.830986	0.0820316	NC	-0.719421	0.124517	NC	BYST_HUMAN	Bystin
cluster_contig3569	-1.07592	0.0183946	DOWN	-0.824342	0.0917406	NC	-0.235082	0.696727	NC	PACS2_HUMAN	Phosphofurin acidic cluster sorting protein 2
cluster_contig357	-1.54647	0.00477116	DOWN	-1.25488	0.0502842	NC	-0.28331	0.630556	NC	RPAB3_MOUSE	DNA-directed RNA polymerases I, II, and III subunit RPABC3
cluster_contig3571	-1.28384	0.00754668	DOWN	-1.06358	0.0361169	DOWN	-0.211334	0.758004	NC	HGNAT_MOUSE	Heparan-alpha-glucosaminide N-acetyltransferase
cluster_contig3572	1.11969	0.0120711	UP	0.641096	0.191372	NC	0.493239	0.349358	NC	HGNAT_MOUSE	Heparan-alpha-glucosaminide N-acetyltransferase
cluster_contig3576	0	1	NC	-1.6695	0.0044934	DOWN	1.56723	0.00411646	UP
cluster_contig3578	-1.60823	0.000167239	NC	-0.476296	0.366794	NC	-1.12986	0.0115331	DOWN	RBP2A_PLAF7	Reticulocyte-binding protein 2 homolog a {ECO:0000312|EMBL:CAD52492.1}
cluster_contig3584	-1.3707	0.00487011	DOWN	-1.18326	0.0274332	DOWN	-0.180591	0.729531	NC	MON1A_HUMAN	Vacuolar fusion protein MON1 homolog A
cluster_contig3586	1.95954	5.01e-06	NC	1.35165	0.00191493	UP	0.620164	0.233714	NC	ISY1_HUMAN	Pre-mRNA-splicing factor ISY1 homolog
cluster_contig3588	-1.19547	0.00584018	DOWN	-1.49923	0.000488629	DOWN	0.315073	0.562222	NC	EXU_DROVI	Maternal protein exuperantia
cluster_contig3598	-0.196004	0.744395	NC	-5.49159	3.75e-31	NC	5.30105	1.14e-29	UP	YCX91_PHAAO	Uncharacterized protein ORF91
cluster_contig36	-3.47065	1.91e-14	NC	-0.921448	0.0777985	NC	-2.53756	1.94e-08	DOWN	GR43a	gustatory receptor for sugar taste 43a-like (LOC107042314)
cluster_contig3602	1.15662	0.030137	UP	-0.0278598	0.952319	NC	1.19232	0.0270335	UP
cluster_contig3603	-1.40679	0.00171585	DOWN	-1.72764	0.000100013	DOWN	0.333905	0.529411	NC	ACO11_CHORO	Acyl-CoA Delta(11) desaturase
cluster_contig3608	-1.91558	1.17e-05	DOWN	-0.299236	0.689551	NC	-1.6108	0.00016516	DOWN	BAIP3_MOUSE	BAI1-associated protein 3
cluster_contig362	-0.663803	0.264445	NC	-1.1217	0.0366045	DOWN	0.471716	0.440921	NC
cluster_contig3621	-1.40876	0.00173813	DOWN	-0.945657	0.0534179	NC	-0.452918	0.397261	NC	RAB23_MOUSE	Ras-related protein Rab-23
cluster_contig3625	-1.38629	0.0016462	DOWN	-0.992888	0.0342467	NC	-0.377666	0.489891	NC	RPC3_HUMAN	DNA-directed RNA polymerase III subunit RPC3
cluster_contig3626	-1.20943	0.00901396	DOWN	-0.972309	0.0437346	NC	-0.227413	0.74199	NC	KEN_DROYA	Probable transcription factor Ken
cluster_contig3632	2.33394	0.000518842	UP	0.871681	0.233554	NC	0	1	NC
cluster_contig3634	-1.46257	0.000955144	DOWN	-1.29859	0.00440028	DOWN	-0.153304	0.8118	NC	VGL2B_DANRE	Vesicular glutamate transporter 2.2
cluster_contig364	1.43283	0.00190993	UP	-0.200317	0.752299	NC	1.64552	0.000326626	UP	STK10_MOUSE	Serine/threonine-protein kinase 10
cluster_contig3642	-0.675645	0.171548	NC	-1.63185	0.00024055	DOWN	0.971977	0.037482	NC	AL7A1_BOVIN	Alpha-aminoadipic semialdehyde dehydrogenase
cluster_contig3643	-1.15323	0.0113126	DOWN	-0.400101	0.488155	NC	-0.739325	0.131568	NC	UNC89_CAEEL	Muscle M-line assembly protein unc-89
cluster_contig3644	-1.62072	0.000232313	DOWN	0.0260652	0.947035	NC	-1.63397	0.000154748	DOWN	DTBP1_DROME	Dysbindin protein homolog
cluster_contig3645	-1.16459	0.00745772	DOWN	-0.54278	0.285237	NC	-0.611652	0.205512	NC	GDIA_MOUSE	Rab GDP dissociation inhibitor alpha
cluster_contig3649	1.55097	0.00056248	UP	0.0983578	0.889689	NC	1.46348	0.00140959	UP	RC3H1_XENLA	Roquin-1
cluster_contig3653	-0.512177	0.307122	NC	0.670339	0.17789	NC	-1.16861	0.00884201	DOWN	TM223_MOUSE	Transmembrane protein 223
cluster_contig366	-0.248606	0.656069	NC	-1.19214	0.00697173	DOWN	0.952167	0.0342124	NC	CHDM_DROME	Chromodomain-helicase-DNA-binding protein Mi-2 homolog
cluster_contig3666	-1.48165	0.00264797	DOWN	-0.485754	0.477347	NC	-0.983214	0.0532097	NC	NAS15_CAEEL	Zinc metalloproteinase nas-15
cluster_contig3667	1.00837	0.0257865	UP	-1.59358	0.000226948	DOWN	2.62243	8.8e-10	UP	ABCAD_MOUSE	ATP-binding cassette sub-family A member 13
cluster_contig3670	-1.60221	0.000174966	DOWN	-1.46622	0.000759105	DOWN	-0.122805	0.844426	NC	GLAS_DROVI	Protein glass
cluster_contig3672	-2.41644	2.06e-08	NC	-1.76722	5.98e-05	DOWN	-0.627166	0.204278	NC	MITD1_RAT	MIT domain-containing protein 1
cluster_contig3674	0.274338	0.744413	NC	-1.20695	0.0185108	DOWN	1.49085	0.00436202	UP	PCY2_HUMAN	Ethanolamine-phosphate cytidylyltransferase
cluster_contig3680	-7.65911	3.25e-12	DOWN	-7.7446	3.86e-12	NC	0.0777116	1	NC
cluster_contig3683	-0.168396	0.813982	NC	-1.75603	0.000112075	DOWN	1.60697	0.000443894	UP	SLOB_DROME	Slowpoke-binding protein
cluster_contig3685	-2.11224	7.1e-05	DOWN	0	1	NC	-1.76357	0.000283319	DOWN	HBAP1_RAT	HSPB1-associated protein 1
cluster_contig3692	-1.29176	0.0426366	DOWN	-2.07614	0.000488629	DOWN	0.793182	0.204093	NC	LN596316.1	Cyprinus carpio genome assembly common carp genome ,scaffold 000000330
cluster_contig3696	-1.43601	0.00129113	DOWN	-1.15267	0.0130844	DOWN	-0.267519	0.689259	NC	TAF2_DROME	Transcription initiation factor TFIID subunit 2
cluster_contig3697	1.16439	0.0087981	UP	1.23912	0.00482225	UP	-0.063568	0.907863	NC	INP4A_HUMAN	Type I inositol 3,4-bisphosphate 4-phosphatase
cluster_contig3699	-1.68398	0.00150236	DOWN	0	1	NC	-1.0691	0.104948	NC	ZDH23_HUMAN	Palmitoyltransferase ZDHHC23
cluster_contig3701	-2.31027	5.12e-06	NC	-1.44204	0.0142246	DOWN	-0.859889	0.0714492	NC	PBCB_SCHGR	Putative beta-carotene-binding protein
cluster_contig3703	-2.54663	1.85e-06	DOWN	-1.79728	0.00342114	DOWN	-0.736258	0.152476	NC	XP_015108356.1	PREDICTED: uncharacterized protein LOC107035461 [Diachasma alloeum]
cluster_contig3707	6.41905	8.65e-07	NC	-1.23261	0.0488464	NC	7.55663	3.17e-11	UP	TPH1_CHICK	Tryptophan 5-hydroxylase 1
cluster_contig3708	-0.681009	0.148799	NC	-1.82779	1.75e-05	DOWN	1.15488	0.00874458	UP	PLCX1_MOUSE	PI-PLC X domain-containing protein 1
cluster_contig3713	1.08647	0.020531	UP	1.11355	0.0141223	NC	-0.0139075	0.945988	NC	GLSK_MOUSE	Glutaminase kidney isoform, mitochondrial
cluster_contig3719	1.55921	0.000902242	NC	1.67714	0.000741229	UP	-0.104361	0.958428	NC	FAK1_RAT	Focal adhesion kinase 1
cluster_contig372	0	1	NC	-1.56905	0.0111649	DOWN	0.209113	0.891461	NC
cluster_contig3720	1.73189	0.000159917	NC	1.75102	7.12e-05	UP	-0.0163632	0.911366	NC	FAK1_HUMAN	Focal adhesion kinase 1
cluster_contig3722	-1.37912	0.00182555	DOWN	-0.589124	0.262926	NC	-0.778953	0.100873	NC	TBCK_CHICK	TBC domain-containing protein kinase-like protein
cluster_contig3725	-0.463553	0.38202	NC	-1.02727	0.0281587	DOWN	0.575562	0.255523	NC	TPPC3_CHICK	Trafficking protein particle complex subunit 3
cluster_contig3735	1.17628	0.00720584	UP	1.96852	4.06e-06	UP	-0.783483	0.0953897	NC	SV2B_RAT	Synaptic vesicle glycoprotein 2B
cluster_contig3737	-1.95795	0.000243759	DOWN	-0.848066	0.287181	NC	-1.09712	0.0236182	NC	IF4A_CAEEL	Eukaryotic initiation factor 4A
cluster_contig3742	0.270204	0.633411	NC	1.19259	0.0101197	UP	-0.913839	0.0566127	NC	XP_019859606.1	PREDICTED: protein enabled homolog [Amphimedon queenslandica]
cluster_contig3747	0.778632	0.100044	NC	-0.352654	0.541941	NC	1.13888	0.0117192	UP	ATR_XENLA	Serine/threonine-protein kinase atr
cluster_contig3749	2.4978	4.36e-07	NC	-1.68913	0.000160196	DOWN	4.20729	1.22e-17	NC	DPOLZ_HUMAN	DNA polymerase zeta catalytic subunit
cluster_contig375	0	1	NC	-2.96051	2.51e-06	DOWN	2.61795	2.14e-05	NC	ANK1_HUMAN	Ankyrin-1
cluster_contig3750	0	1	NC	-1.75374	0.00169366	DOWN	7.60385	8.8e-12	UP
cluster_contig3754	1.01322	0.0318946	UP	0.61772	0.247739	NC	0.405404	0.479974	NC	IRS1_CHLAE	Insulin receptor substrate 1
cluster_contig3756	-10.5394	2.56e-32	DOWN	-6.66	4.94e-07	NC	-3.87682	5.26e-16	NC	BAIP2_RAT	Brain-specific angiogenesis inhibitor 1-associated protein 2
cluster_contig3758	-1.15749	0.00823045	DOWN	-0.586794	0.245841	NC	-0.557658	0.257771	NC	ACINU_HUMAN	Apoptotic chromatin condensation inducer in the nucleus
cluster_contig376	1.69622	6.45e-05	UP	1.08162	0.0159383	UP	0.622421	0.201982	NC	XP_015119684.1	PREDICTED: uncharacterized protein LOC107042938 [Diachasma alloeum]
cluster_contig3765	-1.30566	0.00354359	DOWN	-0.163221	0.849263	NC	-1.13039	0.0116875	DOWN	DCA13_CHICK	DDB1- and CUL4-associated factor 13
cluster_contig3768	0.238961	0.675998	NC	1.72758	5.27e-05	UP	-1.47486	0.000585139	DOWN	TTC14_DROME	Tetratricopeptide repeat protein 14 homolog
cluster_contig3775	-0.784556	0.101727	NC	0.34774	0.583836	NC	-1.12245	0.0173709	DOWN	DSCL_DROME	Down syndrome cell adhesion molecule-like protein Dscam2
cluster_contig3779	-1.11855	0.0117388	DOWN	-0.606989	0.232146	NC	-0.504373	0.317689	NC	SNX14_MOUSE	Sorting nexin-14
cluster_contig378	-1.49514	0.000524015	DOWN	-1.072	0.0187441	DOWN	-0.411893	0.426241	NC	TF2H1_DROME	General transcription factor IIH subunit 1
cluster_contig3782	-1.94243	1.01e-05	DOWN	-1.19165	0.0111862	DOWN	-0.730162	0.141937	NC	XP_015125363.1	PREDICTED: uncharacterized protein LOC107047139 [Diachasma alloeum] &gt;XP_015125364.1 PREDICTED: uncharacterized protein LOC107047139 [Diachasma alloeum] &gt;XP_015125366.1 PREDICTED: uncharacterized protein LOC107047139 [Diachasma alloeum] &gt;XP_015125370.1 PREDICTED: uncharacterized protein LOC107047139 [Diachasma alloeum]
cluster_contig3786	0.0754356	0.907091	NC	1.0831	0.0174134	UP	-0.998999	0.0286532	NC	KI18A_HUMAN	Kinesin-like protein KIF18A
cluster_contig3792	-1.07052	0.0195252	DOWN	-0.821725	0.0951591	NC	-0.232912	0.697673	NC	FAAA_HUMAN	Fumarylacetoacetase
cluster_contig3794	-0.840037	0.0678658	NC	-1.08565	0.0163393	DOWN	0.255451	0.657099	NC	PIGT_HUMAN	GPI transamidase component PIG-T
cluster_contig3800	-0.0194257	0.974694	NC	-1.75889	0.000301162	DOWN	1.75465	0.000443663	UP	PO12_NASVI	Retrovirus-related Pol polyprotein from type-1 retrotransposable element R1 2
cluster_contig3801	-3.58209	4.35e-16	DOWN	-1.21489	0.0086852	NC	-2.34707	2.99e-08	NC	RIR2_PLAF4	Ribonucleoside-diphosphate reductase small chain
cluster_contig3802	-2.2103	2.96e-07	DOWN	-0.562636	0.289661	NC	-1.63414	0.000190083	DOWN	MCEL_FOWPN	mRNA-capping enzyme catalytic subunit
cluster_contig3807	-1.67193	7.5e-05	DOWN	-0.839254	0.0716715	NC	-0.821689	0.0729667	NC	XP_015126510.1	PREDICTED: uncharacterized protein LOC107048065 [Diachasma alloeum]
cluster_contig3811	-2.76038	1.05e-08	DOWN	-1.63953	0.00245722	DOWN	-1.10838	0.0137808	DOWN	ECHD3_RAT	Enoyl-CoA hydratase domain-containing protein 3, mitochondrial
cluster_contig382	-2.44568	6.29e-09	DOWN	1.18537	0.00743053	UP	-3.62581	7.77e-17	DOWN	CP023339.1	Drosophila melanogaster strain rover (forR) chromosome 2L
cluster_contig383	-0.532574	0.379412	NC	-1.31767	0.00906131	DOWN	0.796111	0.139894	NC
cluster_contig3835	-0.611534	0.202803	NC	0.798447	0.0933901	NC	-1.39911	0.00125881	DOWN	TWF_DROME	Twinfilin
cluster_contig3840	-1.33566	0.00261016	DOWN	-0.49352	0.376126	NC	-0.832388	0.0768681	NC	DNAT_DROME	Dopamine N-acetyltransferase {ECO:0000312|EMBL:AAF47172.1}
cluster_contig3843	-0.205441	0.733663	NC	0.880402	0.0836769	NC	-1.07207	0.0264046	DOWN	AMX_DROME	TM2 domain-containing protein almondex
cluster_contig3848	-2.54655	3.44e-06	DOWN	0	1	NC	-2.15558	2.43e-05	NC	NDUF3_XENTR	NADH dehydrogenase [ubiquinone] 1 alpha subcomplex assembly factor 3
cluster_contig3849	-1.56386	0.00182627	DOWN	-1.16015	0.0338733	DOWN	-0.389618	0.546962	NC
cluster_contig3856	2.52725	1.29e-07	NC	-1.03189	0.0271634	DOWN	3.57683	6.69e-14	NC	OTOP2_MOUSE	Otopetrin-2
cluster_contig3857	-7.69773	2.01e-12	DOWN	0	1	NC	-2.86863	2.15e-06	NC	ACHA5_HUMAN	Neuronal acetylcholine receptor subunit alpha-5
cluster_contig3859	-1.86132	2.45e-05	DOWN	0.0104758	0.994433	NC	-1.86394	2.56e-05	DOWN	H4_XENTR	Histone H4
cluster_contig3870	-3.63452	1.6e-15	DOWN	-1.14175	0.0233204	DOWN	-2.47749	2.78e-08	DOWN
cluster_contig3871	-1.38167	0.00163777	DOWN	-1.21305	0.00778312	DOWN	-0.166285	0.768998	NC	SF3B1_XENLA	Splicing factor 3B subunit 1
cluster_contig3882	0	1	NC	-9.37849	7.57e-23	DOWN	9.26908	2.8e-22	UP	HERC2_HUMAN	E3 ubiquitin-protein ligase HERC2
cluster_contig389	1.71171	0.000231087	UP	-0.426104	0.464787	NC	2.15032	2.96e-06	UP
cluster_contig3894	-0.037604	0.983158	NC	2.04607	1.59e-05	UP	-2.07644	1.52e-05	DOWN	ACPH1_APIME	Venom acid phosphatase Acph-1
cluster_contig3895	-1.8136	3.01e-05	DOWN	-1.03956	0.0289394	DOWN	-0.770234	0.0989629	NC	ACPH1_APIME	Venom acid phosphatase Acph-1
cluster_contig39	1.83638	0.000951772	NC	1.59548	0.00196949	UP	0	1	NC	PAX6_MOUSE	Paired box protein Pax-6
cluster_contig3902	-1.54665	0.000592694	DOWN	-0.611024	0.25729	NC	-0.92429	0.0582518	NC	RSRC2_XENLA	Arginine/serine-rich coiled-coil protein 2
cluster_contig3903	0	1	NC	-3.14226	1.16e-07	NC	7.89412	2.61e-13	UP	US74C_DROME	UDP-sugar transporter UST74c
cluster_contig3906	1.05748	0.016822	UP	0.53758	0.29028	NC	0.528868	0.291244	NC	XP_015113896.1	PREDICTED: uncharacterized protein LOC107038997 [Diachasma alloeum]
cluster_contig3907	-1.08639	0.0212269	DOWN	-1.07631	0.0247229	DOWN	-0.00286584	1	NC	RDX_DROME	Protein roadkill
cluster_contig3914	0.637372	0.181775	NC	-0.967984	0.0342508	NC	1.61743	0.000150107	UP	KIWI_ARATH	RNA polymerase II transcriptional coactivator KIWI
cluster_contig3916	1.1415	0.0242928	UP	-0.123318	0.889228	NC	1.27703	0.0123007	UP	LAMP5_XENTR	Lysosome-associated membrane glycoprotein 5
cluster_contig3923	1.31651	0.0031229	NC	1.43938	0.00144041	UP	-0.115607	0.870515	NC	DDX54_MOUSE	ATP-dependent RNA helicase DDX54
cluster_contig3924	-1.09221	0.0243554	DOWN	2.3694	5.15e-05	UP	-3.44938	3.25e-10	DOWN	SXL_MEGSC	Sex-lethal homolog
cluster_contig3925	-3.40795	1.01e-14	DOWN	-1.78664	5.69e-05	DOWN	-1.60755	0.000194309	DOWN
cluster_contig3927	1.82234	3.19e-05	UP	1.55532	0.000587287	UP	0.273159	0.648627	NC	MTOR_MOUSE	Serine/threonine-protein kinase mTOR
cluster_contig3930	-1.04181	0.0589592	NC	0.150163	0.898997	NC	-1.17772	0.0371323	DOWN
cluster_contig3940	0	1	NC	-8.08033	2.94e-14	DOWN	7.98163	7.13e-14	UP	KCNAB_DROME	Potassium voltage-gated channel protein Shab
cluster_contig3942	6.85157	1.88e-08	NC	-0.050788	0.975085	NC	6.81163	1.04e-07	UP	KCNAB_DROME	Potassium voltage-gated channel protein Shab
cluster_contig3945	-1.15392	0.0165482	DOWN	0.0492757	0.952981	NC	-1.19475	0.0110287	DOWN	TTC5_HUMAN	Tetratricopeptide repeat protein 5
cluster_contig3947	3.63677	1.61e-16	UP	-0.0410022	0.958658	NC	3.69386	6.89e-17	UP	ANK3_MOUSE	Ankyrin-3
cluster_contig395	-1.60821	0.00262527	DOWN	0	1	NC	-1.84695	0.00025248	NC
cluster_contig3957	1.26449	0.00489363	UP	1.28031	0.00440946	UP	-0.00380204	0.980642	NC	BTKL_DROME	Tyrosine-protein kinase Btk29A
cluster_contig3966	0.656358	0.186621	NC	1.0331	0.036659	UP	-0.368131	0.557502	NC
cluster_contig3967	0.654957	0.256751	NC	-0.43429	0.414263	NC	1.10705	0.031152	UP	CAP1_MACFA	Adenylyl cyclase-associated protein 1
cluster_contig3981	-1.15352	0.0118352	DOWN	-0.0261314	0.950013	NC	-1.10881	0.0241541	DOWN	ORC3_RAT	Origin recognition complex subunit 3
cluster_contig3984	-2.13807	1.23e-05	DOWN	0	1	NC	-3.67376	1.02e-08	NC	VAV_DROME	Protein vav
cluster_contig3989	1.38366	0.00181328	UP	-0.712596	0.146934	NC	2.09983	1.18e-06	UP	MED1_AEDAE	Mediator of RNA polymerase II transcription subunit 1
cluster_contig3994	-0.288193	0.613292	NC	0.743314	0.186813	NC	-1.01788	0.0438017	DOWN	MYO7A_AEDAE	Myosin-VIIa
cluster_contig4001	-0.959992	0.0391589	NC	-1.06113	0.0227832	DOWN	0.115898	0.855595	NC	OCT1_CAEEL	Organic cation transporter 1
cluster_contig4006	-0.231071	0.690536	NC	1.6348	0.000348913	UP	-1.85817	3.29e-05	DOWN	ACSL5_RAT	Long-chain-fatty-acid--CoA ligase 5
cluster_contig4012	9.7058	6.06e-26	UP	-1.1731	0.0120586	DOWN	10.7814	9.11e-34	UP	UBCD6_DROME	Ubiquitin-conjugating enzyme E2-17 kDa
cluster_contig4014	-2.34875	1.68e-07	DOWN	-3.08847	7.37e-12	DOWN	0.747833	0.117184	NC	LOL2B_DANRE	Lysyl oxidase homolog 2B
cluster_contig4019	0	1	NC	-0.606257	0.298902	NC	2.04488	0.000327226	UP	ARIP4_XENTR	Helicase ARIP4
cluster_contig4020	-0.318357	0.559717	NC	-1.05069	0.0208054	DOWN	0.74617	0.113963	NC	KIF4A_HUMAN	Chromosome-associated kinesin KIF4A
cluster_contig4023	-2.37716	2.41e-07	NC	-0.886502	0.113784	NC	-1.48105	0.00164412	DOWN	RBBP5_DROME	Retinoblastoma-binding protein 5 homolog {ECO:0000250|UniProtKB:Q15291}
cluster_contig4029	2.92231	2.92e-11	UP	0.310639	0.597974	NC	2.62573	2.2e-09	UP	C3G_DROME	Guanine nucleotide-releasing factor 2
cluster_contig4030	-1.12854	0.0137791	DOWN	-0.698559	0.175537	NC	-0.422344	0.435373	NC
cluster_contig4033	-1.94644	0.000275005	DOWN	-1.89525	0.000592705	DOWN	-0.0424508	1	NC	DERF6_DERFA	Mite allergen Der f 6
cluster_contig4042	-1.14134	0.00897195	DOWN	-0.110181	0.874199	NC	-1.02218	0.0219878	DOWN	K0100_HUMAN	UPF0378 protein KIAA0100
cluster_contig4052	-0.872831	0.070373	NC	-1.14881	0.015308	DOWN	0.289511	0.626047	NC	NDEL1_PONAB	Nuclear distribution protein nudE-like 1
cluster_contig4059	-1.71486	4.75e-05	DOWN	-1.30716	0.00273115	DOWN	-0.393409	0.450489	NC	CADF_DROME	Cofilin/actin-depolymerizing factor homolog
cluster_contig406	2.43194	2.33e-05	NC	7.78188	1.81e-11	UP	0	1	NC	PRS7_MOUSE	26S protease regulatory subunit 7
cluster_contig4062	-0.875688	0.0518913	NC	0.523082	0.307314	NC	-1.38136	0.00129825	DOWN	ACON_MOUSE	Aconitate hydratase, mitochondrial
cluster_contig4064	0	1	NC	-1.40852	0.00970699	DOWN	1.94597	0.000325624	UP	HMGX4_XENLA	HMG box-containing protein 4
cluster_contig4071	1.06052	0.0299991	UP	-0.224377	0.764732	NC	1.2979	0.00736907	UP	LZIC_MOUSE	Protein LZIC
cluster_contig4072	1.18937	0.00825987	UP	0.527439	0.318308	NC	0.672643	0.181185	NC	SRBS1_MOUSE	Sorbin and SH3 domain-containing protein 1
cluster_contig4091	0.547986	0.279714	NC	3.66762	2.19e-13	UP	-3.10383	7.07e-10	DOWN	MCM5_DROME	DNA replication licensing factor Mcm5
cluster_contig4092	-0.525556	0.365631	NC	-1.67485	0.000353739	DOWN	1.16087	0.0141254	UP	NUMB_DROME	Protein numb
cluster_contig4093	-0.218685	0.706645	NC	1.27985	0.00819481	UP	-1.48162	0.00154434	DOWN	F173B_XENLA	Protein FAM173B
cluster_contig411	-0.900964	0.0445561	NC	0.193111	0.758978	NC	-1.09043	0.0133091	DOWN	ALF_DROME	Fructose-bisphosphate aldolase
cluster_contig4113	-12.2347	3.09e-46	DOWN	-9.17465	2.39e-21	NC	-3.05772	1.62e-12	NC	MP2K4_HUMAN	Dual specificity mitogen-activated protein kinase kinase 4
cluster_contig4127	-1.40145	0.00201338	DOWN	-0.379914	0.525468	NC	-1.01507	0.0331486	DOWN	F26_LITCT	6-phosphofructo-2-kinase/fructose-2,6-bisphosphatase
cluster_contig4130	-0.643972	0.202313	NC	0.710906	0.175537	NC	-1.34238	0.00403682	DOWN	PEO1_MOUSE	Twinkle protein, mitochondrial
cluster_contig4132	-1.22914	0.101884	NC	0	1	NC	-6.89772	1.94e-08	DOWN	UBE2H_MOUSE	Ubiquitin-conjugating enzyme E2 H
cluster_contig4136	-1.65979	8.32e-05	DOWN	-0.636734	0.193309	NC	-1.00671	0.0236012	DOWN	EF1A1_DROME	Elongation factor 1-alpha 1
cluster_contig4141	-2.98251	3.92e-11	NC	-2.92201	1.15e-10	DOWN	-0.0416131	0.972519	NC	RM01_HUMAN	39S ribosomal protein L1, mitochondrial
cluster_contig4143	1.48556	0.00531584	UP	0.200896	0.708505	NC	1.2928	0.0268908	UP	RBNS5_HUMAN	Rabenosyn-5
cluster_contig415	0.852059	0.0663038	NC	1.2957	0.00389462	UP	-0.433279	0.413501	NC	Y9801_DROME	PP2C-like domain-containing protein CG9801
cluster_contig4153	-0.677319	0.160012	NC	1.11467	0.0126974	UP	-1.78152	2.92e-05	NC	SRRM2_HUMAN	Serine/arginine repetitive matrix protein 2
cluster_contig4154	-1.39085	0.0106268	DOWN	-0.690804	0.349968	NC	-0.690021	0.22141	NC	HGNAT_HUMAN	Heparan-alpha-glucosaminide N-acetyltransferase
cluster_contig4156	-1.24987	0.0039566	DOWN	-0.167044	0.799167	NC	-1.07201	0.0158835	DOWN	YPEL1_HUMAN	Protein yippee-like 1
cluster_contig416	-0.887104	0.10251	NC	0.616119	0.334861	NC	-1.49111	0.00473794	DOWN	HYPA_HYPLI	Hypodermin-A
cluster_contig4160	0	1	NC	-7.84306	1.18e-12	DOWN	7.73925	3.3e-12	UP
cluster_contig4162	-1.32666	0.00219688	DOWN	-0.146426	0.826657	NC	-1.16412	0.00882824	DOWN	ATPA_DROME	ATP synthase subunit alpha, mitochondrial
cluster_contig4163	-1.19103	0.00651632	DOWN	0.677772	0.182808	NC	-1.85088	1.83e-05	DOWN	ZFN2B_MOUSE	AN1-type zinc finger protein 2B
cluster_contig4166	-4.13961	3.8e-20	NC	1.4382	0.004464	UP	-5.56475	1.43e-29	NC	XP_001746672.1	hypothetical protein [Monosiga brevicollis MX1] &gt;EDQ88568.1 predicted protein [Monosiga brevicollis MX1]
cluster_contig4169	-2.61984	1.55e-08	NC	0.800622	0.295752	NC	-3.40964	3.17e-11	DOWN	AAK1	AP2-associated protein kinase 1-like
cluster_contig4171	8.96516	1.53e-20	UP	0.218925	0.713281	NC	8.64639	6.3e-18	NC	VG_DROME	Protein vestigial
cluster_contig4184	-1.68602	6.47e-05	DOWN	-1.42688	0.000956529	DOWN	-0.256462	0.650233	NC	VIT_APIME	Vitellogenin
cluster_contig4187	-1.42969	0.000939004	DOWN	-0.961928	0.0374156	NC	-0.461089	0.367714	NC	CPT2_MOUSE	Carnitine O-palmitoyltransferase 2, mitochondrial
cluster_contig4196	1.24902	0.00606233	UP	0.311609	0.635303	NC	0.954432	0.0423445	NC	R3HD2_HUMAN	R3H domain-containing protein 2
cluster_contig4197	-11.2207	8.39e-38	NC	-10.6077	3.41e-32	DOWN	-0.604358	0.205712	NC	S2544_HUMAN	Solute carrier family 25 member 44
cluster_contig4203	-1.3079	0.00293045	DOWN	-0.981683	0.0351806	NC	-0.313705	0.582187	NC	IF4EA_DANRE	Eukaryotic translation initiation factor 4E-1A
cluster_contig4208	-0.971575	0.0312889	NC	3.08483	1.5e-11	UP	-4.05103	2.71e-18	DOWN	ASM_MOUSE	Sphingomyelin phosphodiesterase
cluster_contig4209	1.16062	0.0153909	UP	0.827884	0.166267	NC	0.347997	0.510542	NC	ECHM_CAEEL	Probable enoyl-CoA hydratase, mitochondrial
cluster_contig4218	-1.07744	0.0209859	DOWN	-0.628381	0.243335	NC	-0.433551	0.418788	NC	BUD31_BRABE	Protein BUD31 homolog
cluster_contig4229	-1.72649	0.000755794	DOWN	-0.527786	0.591238	NC	-1.18456	0.0154584	DOWN	RAB5B_CHICK	Ras-related protein Rab-5B
cluster_contig4230	0.414934	0.442667	NC	1.0428	0.027325	UP	-0.612671	0.23262	NC
cluster_contig4236	-0.0853079	0.908845	NC	-1.47465	0.000977752	DOWN	1.39677	0.00163364	UP	IMPA2_MOUSE	Inositol monophosphatase 2
cluster_contig4238	1.11228	0.0226014	UP	0.897745	0.0808922	NC	0.226819	0.750636	NC	USP9X_HUMAN	Probable ubiquitin carboxyl-terminal hydrolase FAF-X
cluster_contig4240	-0.463134	0.357534	NC	0.943549	0.047457	NC	-1.39125	0.00168258	DOWN	MIOX_HUMAN	Inositol oxygenase
cluster_contig4242	1.02401	0.0232277	UP	0.460476	0.381159	NC	0.574511	0.260215	NC	SF3A3_MOUSE	Splicing factor 3A subunit 3
cluster_contig4248	0	1	NC	-2.06954	0.000225687	DOWN	1.36535	0.0123151	UP
cluster_contig4250	-1.85026	1.84e-05	DOWN	-0.295749	0.67495	NC	-1.54876	0.000286265	DOWN	PANG1_DROME	Protein pangolin, isoforms A/H/I/S
cluster_contig4257	-2.30169	1.48e-05	DOWN	-2.38216	1.71e-05	DOWN	0.0886259	0.99073	NC
cluster_contig4261	-0.326185	0.556341	NC	10.6898	1.26e-31	UP	-10.8994	2.12e-33	DOWN	SPT20_HUMAN	Spermatogenesis-associated protein 20
cluster_contig427	0.201925	0.727349	NC	1.1936	0.00702703	UP	-0.979249	0.0292315	NC	ADCY9_CHICK	Adenylate cyclase type 9
cluster_contig4271	-0.952721	0.0420187	NC	-1.08703	0.0206445	DOWN	0.142503	0.825616	NC	XP_015120089.1	PREDICTED: nephrin-like isoform X2 [Diachasma alloeum]
cluster_contig4272	-4.07049	4.91e-15	NC	-6.74999	1.2e-35	NC	2.69282	4.14e-10	UP	IGS10_HUMAN	Immunoglobulin superfamily member 10
cluster_contig4273	-0.476063	0.339477	NC	0.64747	0.188022	NC	-1.11351	0.011651	DOWN	HAP28_HUMAN	28 kDa heat- and acid-stable phosphoprotein
cluster_contig4279	0.738775	0.193655	NC	1.37875	0.00545213	UP	-0.635208	0.242118	NC	ZFP2_MOUSE	Zinc finger protein 2
cluster_contig4283	-9.82559	8.68e-27	DOWN	-10.4563	6.13e-31	NC	0.639685	0.190866	NC	CD109_HUMAN	CD109 antigen
cluster_contig4284	0.562184	0.325102	NC	-0.843737	0.0930857	NC	1.4196	0.00288406	UP	ABCB7_HUMAN	ATP-binding cassette sub-family B member 7, mitochondrial
cluster_contig4288	-1.72744	0.000212549	DOWN	-1.26151	0.0121023	DOWN	-0.455572	0.410903	NC	KC1E_CHICK	Casein kinase I isoform epsilon
cluster_contig4291	-9.17944	5.62e-22	NC	-8.71431	4.1e-18	DOWN	-0.468345	0.347982	NC	LYPA2_RAT	Acyl-protein thioesterase 2
cluster_contig4297	-3.87082	6.29e-17	DOWN	-2.43994	1.59e-07	DOWN	-1.42388	0.00119352	DOWN	IMPA1_BOVIN	Inositol monophosphatase 1
cluster_contig430	-1.21609	0.0134403	DOWN	-1.09886	0.0288083	DOWN	-0.100354	0.951506	NC	GP112_MOUSE	Probable G-protein coupled receptor 112
cluster_contig4300	-0.694688	0.147473	NC	2.52673	4.38e-07	UP	-3.2041	5.36e-11	DOWN	TM147_RAT	Transmembrane protein 147
cluster_contig4301	-2.89549	9.32e-07	NC	-5.82961	3.24e-25	NC	2.94812	1.73e-10	UP
cluster_contig4307	2.74412	3.15e-05	UP	0.867547	0.113146	NC	0	1	NC	TRM7_HUMAN	Putative tRNA (cytidine(32)/guanosine(34)-2'-O)-methyltransferase {ECO:0000255|HAMAP-Rule:MF_03162}
cluster_contig4308	-1.05738	0.0165247	DOWN	0.857755	0.07553	NC	-1.89688	1.03e-05	DOWN	ACOX3_HUMAN	Peroxisomal acyl-coenzyme A oxidase 3
cluster_contig4309	2.64686	3.38e-10	UP	1.37123	0.0015451	NC	1.27966	0.00307587	NC	L2EFL_DROME	Protein lethal(2)essential for life
cluster_contig4311	-0.173774	0.798636	NC	-1.84441	2.57e-05	NC	1.68117	0.000107164	UP	EMAL1_RAT	Echinoderm microtubule-associated protein-like 1
cluster_contig4312	-0.311788	0.568367	NC	-1.29696	0.00323422	DOWN	0.994576	0.0269273	NC	TSN7_HUMAN	Tetraspanin-7
cluster_contig4313	-1.40356	0.00149201	DOWN	-1.06904	0.0220328	DOWN	-0.324023	0.564183	NC	F177A_MOUSE	Protein FAM177A1
cluster_contig4314	9.71601	5.16e-26	UP	5.15294	7.83e-19	NC	0	1	NC	STX_APLCA	Syntaxin
cluster_contig4316	0.340338	0.584597	NC	1.61986	0.000721168	NC	-1.27125	0.00993268	DOWN	ZCHC2_MOUSE	Zinc finger CCHC domain-containing protein 2
cluster_contig4317	0.465712	0.506736	NC	-1.11591	0.0290353	DOWN	1.58901	0.00212515	UP	B4GA1_BOVIN	Beta-1,4-glucuronyltransferase 1 {ECO:0000250|UniProtKB:O43505}
cluster_contig4321	-2.86031	1.75e-10	NC	-2.44703	5.75e-08	DOWN	-0.414203	0.428457	NC	TRET1_CULQU	Facilitated trehalose transporter Tret1 {ECO:0000250|UniProtKB:Q7PIR5}
cluster_contig4326	0.183632	0.788297	NC	-0.932881	0.0870603	NC	1.13114	0.0269592	UP
cluster_contig4329	1.1891	0.0102961	UP	0.454559	0.424714	NC	0.74397	0.140893	NC	GLSK_MOUSE	Glutaminase kidney isoform, mitochondrial
cluster_contig433	-1.02955	0.0193785	DOWN	-0.811168	0.0826329	NC	-0.209383	0.717266	NC	XP_015109925.1	PREDICTED: uncharacterized protein LOC107036468 [Diachasma alloeum]
cluster_contig4332	-8.73522	7.33e-19	DOWN	0	1	NC	-3.82526	9.43e-12	NC	PAK2_RAT	Serine/threonine-protein kinase PAK 2
cluster_contig4335	-2.69076	5.33e-06	DOWN	0	1	NC	-3.35356	4.57e-08	NC	XP_018639668.1	hypothetical protein PGSY75_1461100, partial [Plasmodium gaboni] &gt;KYN96202.1 hypothetical protein PGSY75_1461100, partial [Plasmodium gaboni]
cluster_contig4336	1.09739	0.0152068	UP	0.481084	0.35944	NC	0.624869	0.223389	NC	P5I13_HUMAN	Tumor protein p53-inducible protein 13
cluster_contig4339	-0.619742	0.197497	NC	0.40939	0.455161	NC	-1.01817	0.0241289	DOWN	ENA_DROME	Protein enabled
cluster_contig434	1.19984	0.00719407	UP	0.613912	0.211167	NC	0.597151	0.2481	NC	FUR2_DROME	Furin-like protease 2
cluster_contig435	-2.24903	1.23e-06	DOWN	-1.65063	0.000740034	DOWN	-0.586475	0.29095	NC	CTR2_VESOR	Chymotrypsin-2
cluster_contig4352	-2.08096	9.03e-07	DOWN	-1.45394	0.000884834	DOWN	-0.618009	0.20195	NC	T2AG_IXOSC	Transcription initiation factor IIA subunit 2
cluster_contig4357	-0.988379	0.0258414	NC	0.471442	0.368306	NC	-1.44531	0.000735337	DOWN	ACSF3_XENLA	Acyl-CoA synthetase family member 3, mitochondrial
cluster_contig436	-0.991606	0.0387983	NC	0.342343	0.654222	NC	-1.32292	0.00743532	DOWN	CTR2_VESOR	Chymotrypsin-2
cluster_contig4362	0.503477	0.375835	NC	-0.656892	0.210704	NC	1.1743	0.0139899	UP
cluster_contig4364	2.11398	1.24e-05	UP	0.783015	0.0986368	NC	1.33887	0.0164788	UP	ARFG1_RAT	ADP-ribosylation factor GTPase-activating protein 1
cluster_contig4365	-0.67083	0.155089	NC	0.340756	0.543421	NC	-1.00117	0.0252885	DOWN	ARFG1_RAT	ADP-ribosylation factor GTPase-activating protein 1
cluster_contig4377	1.39696	0.0014846	UP	0.127	0.86217	NC	1.28422	0.00400727	UP	MOEH_DROPS	Moesin/ezrin/radixin homolog 1 {ECO:0000250|UniProtKB:P46150}
cluster_contig438	-1.83022	0.000327983	DOWN	-0.292628	0.771143	NC	-1.5246	0.00206018	DOWN	MESP2_MOUSE	Mesoderm posterior protein 2
cluster_contig4381	-3.04259	2.31e-10	NC	-1.51746	0.00362015	NC	-1.50889	0.00407079	DOWN	SUWA_DROME	Protein suppressor of white apricot
cluster_contig4383	9.53664	1.2e-24	UP	-0.709634	0.151816	NC	10.1572	7.85e-29	UP	CIC_DROME	Putative transcription factor capicua
cluster_contig4387	-0.928641	0.0511708	NC	0.374953	0.551515	NC	-1.28877	0.00594004	DOWN
cluster_contig4391	-9.57097	7.7e-25	DOWN	-8.14274	1.97e-14	NC	-1.42467	0.0016629	NC	ACE_THETS	Angiotensin-converting enzyme
cluster_contig4396	1.24234	0.013438	UP	-0.423103	0.481663	NC	1.67337	0.000485223	UP	GRAP_HUMAN	GRB2-related adapter protein
cluster_contig44	-2.0735	1.13e-06	DOWN	-1.56648	0.000342691	DOWN	-0.494199	0.325134	NC	YPD1_CAEEL	Uncharacterized protein C05D11.1
cluster_contig440	1.28058	0.00418871	UP	0.903653	0.0563149	NC	0.387475	0.497316	NC	CPSF6_DROME	Cleavage and polyadenylation specificity factor subunit CG7185
cluster_contig4400	-1.25348	0.00371834	DOWN	0.289243	0.620468	NC	-1.52827	0.000342146	DOWN	FAM21_CRIGR	WASH complex subunit FAM21
cluster_contig4402	-0.804091	0.164936	NC	7.6071	7.97e-12	UP	-8.29596	7.86e-16	DOWN	HMCS1_BLAGE	Hydroxymethylglutaryl-CoA synthase 1
cluster_contig441	-1.03619	0.0189786	DOWN	-0.16095	0.803954	NC	-0.860795	0.0603202	NC	PDE8B_MOUSE	High affinity cAMP-specific and IBMX-insensitive 3',5'-cyclic phosphodiesterase 8B
cluster_contig4412	-1.98777	0.000487401	DOWN	0	1	NC	-1.93795	0.00184471	DOWN	KLK10_HUMAN	Kallikrein-10
cluster_contig4416	-9.98082	5.83e-28	DOWN	0	1	NC	-4.34633	3.12e-17	NC	HLF_RAT	Hepatic leukemia factor
cluster_contig4418	-0.89912	0.0453625	NC	0.451385	0.391085	NC	-1.34461	0.00176656	DOWN	KLC_DROME	Kinesin light chain
cluster_contig4421	-2.19564	0.000255887	NC	0	1	NC	-7.42365	7.01e-11	DOWN	VP13A_HUMAN	Vacuolar protein sorting-associated protein 13A
cluster_contig4424	1.11828	0.0117127	UP	0.772695	0.104514	NC	0.357014	0.517048	NC	XP_015111641.1	PREDICTED: uncharacterized protein LOC107037544 isoform X1 [Diachasma alloeum]
cluster_contig4426	-0.484851	0.435715	NC	0.713254	0.216661	NC	-1.18958	0.0189192	DOWN	PSB7_MOUSE	Proteasome subunit beta type-7
cluster_contig4430	1.00988	0.023427	UP	0.404591	0.459786	NC	0.617004	0.20447	NC	XP_015110687.1	PREDICTED: uncharacterized protein LOC107036933 [Diachasma alloeum]
cluster_contig4431	0	1	NC	-8.20293	7.33e-15	DOWN	8.10161	1.67e-14	UP	ERLEC_MOUSE	Endoplasmic reticulum lectin 1
cluster_contig4435	1.50162	0.000794308	UP	-0.495446	0.353646	NC	2.01056	5.13e-06	UP
cluster_contig4440	-3.17697	3.83e-08	DOWN	-3.42345	1.66e-09	DOWN	0.262189	0.65858	NC	NADE_DROME	Probable glutamine-dependent NAD(+) synthetase
cluster_contig4445	-11.8287	8.35e-43	DOWN	-10.568	6.63e-32	DOWN	-1.26123	0.00504761	DOWN	UFSP2_DROME	Probable Ufm1-specific protease 2
cluster_contig4447	1.8409	0.000135049	UP	0.0768555	0.911259	NC	1.77332	0.000314506	UP
cluster_contig4450	-1.13914	0.0333806	NC	-1.38408	0.00682911	DOWN	0.258282	0.673607	NC	UT1_HUMAN	Urea transporter 1
cluster_contig4459	1.28726	0.00418182	UP	-0.525923	0.310845	NC	1.82255	2.9e-05	UP	ARH_MOUSE	Low density lipoprotein receptor adapter protein 1
cluster_contig4460	2.21721	4.12e-07	UP	1.43666	0.00138804	UP	0.786329	0.117935	NC	POL_SFV3L	Pro-Pol polyprotein
cluster_contig4467	-3.32126	1.44e-12	DOWN	-3.02728	1.82e-10	DOWN	-0.286121	0.583636	NC	PCNA_SARCR	Proliferating cell nuclear antigen
cluster_contig4472	-2.01552	5.23e-06	NC	-0.491149	0.428135	NC	-1.51755	0.000542301	DOWN
cluster_contig4473	-3.406	1.72e-09	DOWN	-2.37109	0.00027264	NC	-1.02929	0.0290633	NC
cluster_contig4476	-0.568465	0.246166	NC	10.5616	1.3e-30	NC	-11.0217	2.22e-34	DOWN	SPF27_MOUSE	Pre-mRNA-splicing factor SPF27
cluster_contig4479	-0.278336	0.615023	NC	-1.53141	0.000450855	DOWN	1.25956	0.00453447	UP	MICU3_HUMAN	Calcium uptake protein 3, mitochondrial
cluster_contig4481	9.59112	4.55e-25	NC	-1.43929	0.00120984	NC	10.9327	5.24e-35	UP	PTC_DROME	Protein patched
cluster_contig4482	2.12042	2.24e-05	UP	-0.119423	0.891121	NC	2.25079	7.96e-06	UP	SP34_APIME	Venom serine protease 34
cluster_contig4484	1.80785	0.000113371	UP	2.23095	4.19e-06	UP	-0.417725	0.546534	NC	ABCG4_HUMAN	ATP-binding cassette sub-family G member 4
cluster_contig4488	1.2272	0.00846777	UP	1.88859	0.000175486	UP	-0.65376	0.345907	NC	F26_LITCT	6-phosphofructo-2-kinase/fructose-2,6-bisphosphatase
cluster_contig4497	0	1	NC	-1.98889	0.00133833	DOWN	0.602876	0.392166	NC	GCY8E_DROME	Soluble guanylate cyclase 88E
cluster_contig4501	1.17511	0.0109264	UP	-1.09753	0.0164231	DOWN	2.29074	1.72e-07	UP	UNC22_CAEEL	Twitchin {ECO:0000303|PubMed:7190524}
cluster_contig4505	1.40439	0.00149914	UP	0.075087	0.919229	NC	1.33558	0.00300079	UP	DPOLZ_MOUSE	DNA polymerase zeta catalytic subunit
cluster_contig4507	0.742515	0.133611	NC	-0.302979	0.618222	NC	1.05733	0.0247415	UP
cluster_contig4516	0.953126	0.0435883	NC	-0.167497	0.804416	NC	1.13146	0.0148659	UP
cluster_contig4528	-1.11709	0.015763	DOWN	-0.287443	0.667812	NC	-0.820716	0.092231	NC
cluster_contig453	0.314705	0.572377	NC	-1.01624	0.0286765	DOWN	1.34562	0.00244274	UP	ANAG_HUMAN	Alpha-N-acetylglucosaminidase
cluster_contig4530	-1.84604	2.56e-05	DOWN	-1.07935	0.0256991	NC	-0.753653	0.105221	NC	PLOD3_RAT	Procollagen-lysine,2-oxoglutarate 5-dioxygenase 3
cluster_contig4543	-1.53295	0.0113256	NC	-3.49209	2.59e-11	DOWN	1.96235	8.78e-05	NC	SP9_XENTR	Transcription factor Sp9
cluster_contig455	-0.768528	0.104005	NC	1.12066	0.0139752	NC	-1.87286	1.38e-05	DOWN
cluster_contig4553	1.1985	0.0100665	UP	0.25084	0.696097	NC	0.95496	0.0502709	NC	CNTP5_CHICK	Contactin-associated protein-like 5
cluster_contig4554	-1.53152	0.00036506	DOWN	-0.965636	0.0371038	NC	-0.551181	0.265573	NC	WDTC1_HUMAN	WD and tetratricopeptide repeats protein 1
cluster_contig4558	1.48803	0.00444621	UP	-2.37535	1.13e-07	NC	3.8654	1.51e-15	NC	MAN2_DROME	Alpha-mannosidase 2
cluster_contig4568	0.0692555	0.919836	NC	1.21455	0.00735427	UP	-1.13496	0.0120491	DOWN	PKRA_DROME	Protein krasavietz
cluster_contig4571	-0.789195	0.123469	NC	0.800802	0.196061	NC	-1.57391	0.00254203	DOWN	E41LA_MOUSE	Band 4.1-like protein 4A
cluster_contig4573	-0.520128	0.427001	NC	-1.60853	0.00117344	DOWN	1.095	0.0276435	UP	LIPG_BOVIN	Gastric triacylglycerol lipase
cluster_contig4579	0	1	NC	-10.1186	2.5e-28	DOWN	6.84282	2.77e-25	NC	THK33131.1	chemosensory protein 1
cluster_contig4584	0	1	NC	-1.81111	0.00123691	DOWN	1.65278	0.00234316	UP	RDH10_XENTR	Retinol dehydrogenase 10
cluster_contig4590	-1.04964	0.0173744	DOWN	-0.969393	0.0333578	NC	-0.0671847	0.921186	NC	STML2_HUMAN	Stomatin-like protein 2, mitochondrial
cluster_contig4591	0.567388	0.328877	NC	2.33721	6.05e-06	UP	0	1	NC	P5CS_MOUSE	Delta-1-pyrroline-5-carboxylate synthase
cluster_contig4593	-2.13687	1.86e-06	DOWN	-1.72121	0.000207127	DOWN	-0.3995	0.453664	NC	XP_015116300.1	PREDICTED: uncharacterized protein LOC107040645 [Diachasma alloeum]
cluster_contig4600	-0.897808	0.0555201	NC	-1.35069	0.00267956	DOWN	0.463958	0.366618	NC	4CL2_ARATH	4-coumarate--CoA ligase 2
cluster_contig4603	-4.93197	1.71e-12	NC	-3.67977	6.46e-06	NC	-1.23871	0.0196859	DOWN
cluster_contig4608	-2.89195	8.66e-11	DOWN	0.0177329	0.962072	NC	-2.89507	8.6e-10	NC	LIPP_MYOCO	Pancreatic triacylglycerol lipase
cluster_contig461	1.00261	0.0465461	UP	-0.233401	0.698543	NC	1.25126	0.0106978	UP	ZFY_BOVIN	Zinc finger Y-chromosomal protein
cluster_contig4618	-1.96233	4.79e-05	DOWN	-1.33753	0.00876311	NC	-0.60239	0.348715	NC	PKHA7_HUMAN	Pleckstrin homology domain-containing family A member 7
cluster_contig4619	0	1	NC	-1.39396	0.00673065	DOWN	2.11878	0.000104633	UP	PKHA7_HUMAN	Pleckstrin homology domain-containing family A member 7
cluster_contig4624	1.61515	0.000496484	UP	0.52394	0.391085	NC	1.10819	0.0244388	UP
cluster_contig4625	-1.01254	0.0746604	NC	-1.70274	0.00163578	DOWN	0.695599	0.298667	NC	LYSM3_HUMAN	LysM and putative peptidoglycan-binding domain-containing protein 3
cluster_contig4630	10.2769	2.48e-30	NC	0.771389	0.132533	NC	9.41223	2.88e-23	UP	RASA3_HUMAN	Ras GTPase-activating protein 3
cluster_contig4642	1.71263	0.000302961	UP	-0.251506	0.749615	NC	1.9683	3.2e-05	NC	DPOLZ_MOUSE	DNA polymerase zeta catalytic subunit
cluster_contig4648	0.338106	0.675531	NC	-2.28552	2.95e-06	NC	2.63736	1.71e-07	UP	TAF1_DROME	Transcription initiation factor TFIID subunit 1
cluster_contig4653	-0.379826	0.544156	NC	-1.30003	0.00674617	DOWN	0.93683	0.0533338	NC	RHG39_HUMAN	Rho GTPase-activating protein 39
cluster_contig4654	0	1	NC	-9.03253	2.25e-20	DOWN	8.92747	7.71e-20	UP	AFAD_HUMAN	Afadin
cluster_contig4656	-1.62678	0.000210075	DOWN	1.19072	0.010872	UP	-2.80037	2.35e-10	DOWN	SWAHB_MOUSE	Ankyrin repeat domain-containing protein SOWAHB
cluster_contig4659	-8.64221	3.17e-18	DOWN	0	1	NC	-8.54287	2.21e-17	DOWN	PPID_MOUSE	Peptidyl-prolyl cis-trans isomerase D
cluster_contig4663	0.0965258	0.903966	NC	1.09229	0.018591	UP	-0.985175	0.0350361	NC	POL_ALV	Pol polyprotein
cluster_contig4667	-3.12989	1.33e-12	DOWN	-0.429897	0.48031	NC	-2.67943	6.98e-10	DOWN	XP_011304885.1	PREDICTED: uncharacterized protein LOC105267614 isoform X1 [Fopius arisanus]
cluster_contig4669	-1.64009	0.00423194	DOWN	-1.55315	0.0133459	DOWN	-0.0788521	0.902356	NC
cluster_contig467	-1.06789	0.0176348	DOWN	0.0511548	0.944534	NC	-1.11051	0.0136273	DOWN	S2536_DANRE	Solute carrier family 25 member 36-A
cluster_contig4670	1.85348	1.01e-05	UP	0.850219	0.0667265	NC	1.01864	0.0217907	UP	OB56H	General odorant-binding protein 56h
cluster_contig4671	-1.65983	0.000241058	DOWN	-0.890075	0.0783832	NC	-0.758064	0.121321	NC
cluster_contig4675	-2.51861	3.94e-06	DOWN	-2.33033	4.17e-05	DOWN	-0.180304	0.720464	NC	ZCHC4_XENTR	Zinc finger CCHC domain-containing protein 4
cluster_contig4676	-1.11884	0.0149934	DOWN	-0.394578	0.48821	NC	-0.715801	0.154974	NC	S36A4_XENLA	Proton-coupled amino acid transporter 4
cluster_contig468	0.99483	0.0298406	NC	1.45543	0.00103828	UP	-0.448412	0.398885	NC	KHDR2_DANRE	KH domain-containing, RNA-binding, signal transduction-associated protein 2
cluster_contig4681	-2.14853	6.92e-05	DOWN	0	1	NC	-1.84894	0.00138359	DOWN	VATD1_DROME	V-type proton ATPase subunit D 1
cluster_contig4683	-2.91755	9.99e-08	DOWN	-2.85521	2.31e-07	NC	-0.0450051	0.952429	NC
cluster_contig4685	0.0265209	0.970388	NC	1.1177	0.0123637	UP	-1.07674	0.0151802	DOWN	XDH_DROPS	Xanthine dehydrogenase
cluster_contig4687	-0.180149	0.792883	NC	-1.40664	0.00228631	DOWN	1.23871	0.00718283	UP	ABL_DROME	Tyrosine-protein kinase Abl
cluster_contig4688	-2.03696	0.000310591	NC	0	1	NC	-7.51388	2.45e-11	DOWN	SC6A9_BOVIN	Sodium- and chloride-dependent glycine transporter 1
cluster_contig4689	-1.85769	2.4e-05	DOWN	0.802241	0.0912446	NC	-2.65383	1.04e-09	DOWN
cluster_contig4691	-8.83431	1.59e-19	NC	-8.12854	1.61e-14	DOWN	-0.702689	0.234192	NC	POPD1_DANRE	Blood vessel epicardial substance
cluster_contig4696	0.479878	0.359988	NC	-0.580243	0.287523	NC	1.06663	0.023941	UP	CANA_DROME	Calpain-A
cluster_contig4697	-0.0472266	0.964417	NC	1.54257	0.00150501	UP	-1.5762	0.00111733	DOWN	MBL_DROME	Protein muscleblind
cluster_contig4699	1.61753	0.000534575	NC	-0.0884819	0.921876	NC	1.71591	0.000232474	UP	VPP1_MOUSE	V-type proton ATPase 116 kDa subunit a isoform 1
cluster_contig470	-0.251551	0.660687	NC	1.0849	0.0200681	UP	-1.32962	0.00307002	DOWN	RECQ5_MOUSE	ATP-dependent DNA helicase Q5
cluster_contig4704	-1.97109	0.000240182	DOWN	0	1	NC	-2.65369	3.14e-05	DOWN	B4GT7_HUMAN	Beta-1,4-galactosyltransferase 7
cluster_contig4705	-0.553719	0.284249	NC	0.639998	0.247655	NC	-1.18608	0.0134063	DOWN
cluster_contig4706	-1.71833	0.000292833	DOWN	-1.36988	0.00561449	DOWN	-0.333997	0.617824	NC	TRET1_CULQU	Facilitated trehalose transporter Tret1 {ECO:0000250|UniProtKB:Q7PIR5}
cluster_contig4709	-1.4696	0.00202989	DOWN	-0.614286	0.357574	NC	-0.855524	0.0642528	NC	WNK3_MOUSE	Serine/threonine-protein kinase WNK3
cluster_contig471	0	1	NC	-2.55722	3.93e-06	DOWN	0.931507	0.10872	NC
cluster_contig4710	-3.78988	3.5e-17	DOWN	-0.337468	0.561317	NC	-3.44383	3.98e-14	DOWN	INX7_DROME	Innexin inx7
cluster_contig4712	-1.10208	0.0198838	DOWN	-0.328177	0.661841	NC	-0.758278	0.105219	NC	SP9_XENTR	Transcription factor Sp9
cluster_contig4714	-0.425613	0.406979	NC	0.875348	0.0620979	NC	-1.2822	0.00343732	DOWN	TF2H2_RAT	General transcription factor IIH subunit 2
cluster_contig4718	1.00961	0.0287247	UP	0.0722588	0.919794	NC	0.947374	0.0470863	NC	LOLA2_DROME	Longitudinals lacking protein, isoforms H/M/V
cluster_contig4723	0	1	NC	-1.13956	0.031809	DOWN	2.70954	3.74e-06	NC
cluster_contig4734	-2.38222	4.49e-05	DOWN	0	1	NC	-1.62312	0.00196567	DOWN
cluster_contig4735	-1.36076	0.00171328	NC	10.4607	7.84e-30	NC	-11.7008	6.78e-40	DOWN	INT11_CHICK	Integrator complex subunit 11
cluster_contig4736	-1.19234	0.011973	DOWN	-1.09744	0.0274511	DOWN	-0.086198	0.883823	NC	TIGD4_HUMAN	Tigger transposable element-derived protein 4
cluster_contig4739	2.24704	5.75e-07	UP	0.207022	0.75238	NC	2.05072	6.44e-06	UP	GBRB_MUSDO	Gamma-aminobutyric acid receptor subunit beta
cluster_contig4740	-1.01264	0.0686271	NC	0.507013	0.389158	NC	-1.50607	0.00326496	DOWN
cluster_contig4744	-11.0311	3e-36	DOWN	-10.5876	4.72e-32	DOWN	-0.449932	0.36296	NC	HTS_DROME	Protein hu-li tai shao
cluster_contig4748	-0.376568	0.475407	NC	-1.42321	0.00109013	DOWN	1.05669	0.0178749	UP	SETD8_DROPS	Histone-lysine N-methyltransferase pr-set7
cluster_contig4750	-0.628855	0.211273	NC	-1.02258	0.0302828	DOWN	0.410837	0.439595	NC	PIGQ_MOUSE	Phosphatidylinositol N-acetylglucosaminyltransferase subunit Q
cluster_contig4751	1.70116	0.000172633	UP	0.916766	0.0498252	NC	0.795488	0.144089	NC	TAG53_CAEEL	Putative protein tag-53
cluster_contig4754	1.73759	0.00170241	UP	7.90669	3.92e-12	UP	0	1	NC	DOCK1_HUMAN	Dedicator of cytokinesis protein 1
cluster_contig4755	-2.53737	2.73e-06	DOWN	-2.63396	1.09e-06	DOWN	0.107843	0.884548	NC	NTCP7_DANRE	Sodium/bile acid cotransporter 7
cluster_contig4768	-1.00295	0.0370071	DOWN	-0.0510217	0.973585	NC	-0.942411	0.0521327	NC	LOLAL_DROME	Longitudinals lacking protein-like
cluster_contig4778	1.27499	0.00356665	UP	1.34743	0.00261893	UP	-0.0581189	0.947265	NC	ZN362_HUMAN	Zinc finger protein 362
cluster_contig4779	-1.37096	0.0055033	DOWN	-0.125749	0.898905	NC	-1.24188	0.016187	DOWN	XP_011315197.1	PREDICTED: serine protease inhibitor 3-like [Fopius arisanus]
cluster_contig4785	-0.933104	0.0759755	NC	-1.28861	0.0106626	DOWN	0.365651	0.533945	NC	GLCE_HUMAN	D-glucuronyl C5-epimerase
cluster_contig48	1.30344	0.00579818	UP	0.935119	0.0568169	NC	0.374732	0.580937	NC	SEM2A_SCHGR	Semaphorin-2A
cluster_contig480	-3.12642	7.09e-08	NC	-3.09684	1.67e-07	DOWN	-0.0148764	1	NC	BAB2_DROME	Protein bric-a-brac 2
cluster_contig4801	0	1	NC	-2.61464	7.49e-07	DOWN	2.18549	7.08e-05	UP	DGLA_MOUSE	Sn1-specific diacylglycerol lipase alpha
cluster_contig4802	1.63145	0.00140486	UP	-0.158054	0.837647	NC	1.80689	0.000407198	UP
cluster_contig4805	1.38105	0.00288131	UP	2.5098	4.22e-08	NC	-1.10925	0.0250484	NC	TCPZ_MOUSE	T-complex protein 1 subunit zeta
cluster_contig4806	1.83927	2.35e-05	UP	-0.805064	0.0909197	NC	2.66006	8.32e-10	UP	XYLT_DROME	Xylosyltransferase oxt
cluster_contig4809	-0.975115	0.043145	NC	-1.39312	0.0027492	DOWN	0.428671	0.426976	NC	PAL1_DROME	Peptidyl-alpha-hydroxyglycine alpha-amidating lyase 1
cluster_contig4810	-2.99809	2.7e-12	NC	-0.639405	0.205434	NC	-2.34911	2.97e-08	DOWN	YL357_MIMIV	Uncharacterized protein L357
cluster_contig4811	-1.00833	0.0257401	NC	1.04903	0.0298515	UP	-2.03545	3.7e-06	NC	PK1IP_DANRE	p21-activated protein kinase-interacting protein 1-like
cluster_contig4817	-0.158988	0.818051	NC	-1.96371	9.35e-06	NC	1.80963	4.07e-05	UP	ELYS_MOUSE	Protein ELYS
cluster_contig4818	1.74481	0.00159493	NC	-1.04328	0.0387186	DOWN	2.80119	6.35e-08	NC	ELYS_MOUSE	Protein ELYS
cluster_contig4819	-0.26593	0.634553	NC	-1.23786	0.00524799	DOWN	0.984154	0.0295336	NC	BRWD1_HUMAN	Bromodomain and WD repeat-containing protein 1
cluster_contig482	0.556468	0.374003	NC	-0.949242	0.125114	NC	1.51319	0.00630826	UP	R3HD2_HUMAN	R3H domain-containing protein 2
cluster_contig4820	-1.01677	0.0318154	DOWN	-0.490345	0.376773	NC	-0.514846	0.353712	NC	CECR2_HUMAN	Cat eye syndrome critical region protein 2
cluster_contig4821	0.987604	0.027526	NC	1.65223	0.000148044	UP	-0.653247	0.185056	NC	FRMD5_MOUSE	FERM domain-containing protein 5
cluster_contig4823	0.967808	0.0359612	NC	1.43122	0.00108727	UP	-0.455417	0.364231	NC	PDE11_DROME	Dual 3',5'-cyclic-AMP and -GMP phosphodiesterase 11
cluster_contig4828	-7.88575	1.62e-13	DOWN	0	1	NC	-1.06963	0.0959496	NC	NFYB_RAT	Nuclear transcription factor Y subunit beta
cluster_contig4830	-2.95831	1.29e-09	DOWN	-2.83748	9.89e-09	DOWN	-0.114377	0.850275	NC	LMA2L_PONAB	VIP36-like protein
cluster_contig4831	-1.09728	0.0130322	DOWN	-0.781116	0.101575	NC	-0.301799	0.59022	NC	WASH1_BOVIN	WAS protein family homolog 1
cluster_contig484	-1.38679	0.0118016	DOWN	0	1	NC	-8.05376	2.51e-14	DOWN	MED18_AEDAE	Mediator of RNA polymerase II transcription subunit 18
cluster_contig4840	1.12737	0.0181727	UP	1.12344	0.0136053	UP	0.0141015	0.959298	NC	DSCL_DROME	Down syndrome cell adhesion molecule-like protein Dscam2
cluster_contig4844	0.782044	0.116506	NC	-0.459599	0.420637	NC	1.24468	0.00789231	UP
cluster_contig4845	-0.432186	0.401113	NC	0.677568	0.173297	NC	-1.09986	0.0144513	DOWN	ST32B_MOUSE	Serine/threonine-protein kinase 32B
cluster_contig4847	-3.26543	1.16e-07	DOWN	0	1	NC	-1.44814	0.0176049	DOWN
cluster_contig4849	-0.414472	0.450636	NC	-1.02005	0.0329235	DOWN	0.611529	0.235085	NC	YC91_CAEEL	Uncharacterized MFS-type transporter C09D4.1
cluster_contig4853	-10.7596	4.55e-34	DOWN	-10.4649	4.45e-31	DOWN	-0.301866	0.56232	NC	MVL_DROME	Protein Malvolio
cluster_contig4854	-1.47358	0.00089253	DOWN	-2.70971	4.9e-10	DOWN	1.25019	0.00459512	UP	MVL_DROME	Protein Malvolio
cluster_contig4857	1.40482	0.00157427	UP	0.370787	0.506556	NC	1.0396	0.0267288	UP	MARE1_XENTR	Microtubule-associated protein RP/EB family member 1
cluster_contig4873	1.68653	0.000199097	UP	1.36351	0.00252868	UP	0.328725	0.642144	NC
cluster_contig4874	1.10496	0.0225387	UP	0.636218	0.267638	NC	0.473026	0.406066	NC	ZCHC4_XENTR	Zinc finger CCHC domain-containing protein 4
cluster_contig4879	1.15718	0.0080076	UP	-0.439065	0.409248	NC	1.60974	0.000152422	UP	CHD7_MOUSE	Chromodomain-helicase-DNA-binding protein 7
cluster_contig488	0.380682	0.519298	NC	2.26416	5.21e-05	UP	-1.87455	0.0014427	DOWN	OTOP2_MOUSE	Otopetrin-2
cluster_contig4884	-0.822326	0.0977181	NC	0.775283	0.178112	NC	-1.58109	0.00114404	DOWN	TBC25_HUMAN	TBC1 domain family member 25
cluster_contig4886	1.44599	0.00117883	UP	2.76853	8.45e-10	UP	-1.30907	0.00656	DOWN	ZN106_MOUSE	Zinc finger protein 106
cluster_contig4887	-1.35556	0.00237913	DOWN	-0.242703	0.733419	NC	-1.10153	0.0145973	DOWN	RNH2A_DROME	Ribonuclease H2 subunit A
cluster_contig489	2.87278	3.94e-07	UP	0.191408	0.772066	NC	2.68878	4.67e-06	UP	OTOP2_MOUSE	Otopetrin-2
cluster_contig4890	-1.57192	0.000300877	DOWN	0.336712	0.580597	NC	-1.89825	1.29e-05	DOWN	RB40C_MOUSE	Ras-related protein Rab-40C
[truncated: 10,385 more rows]
